# Supplementary material for: Synthetic small molecule GLP-1 secretagogues prepared by means of a three-component indole annulation strategy
Source: PubMed Central journal article supplement (PMC4926213; doi:10.1038/srep28934), 2016-06-29
Supplement: srep28934-s1.pdf [file srep28934-s1.pdf]

## Synthetic small molecule GLP-1 secretagogues prepared by means of a three-component indole annulation strategy

Oleg G. Chepurny<sup>1</sup>, Colin A. Leech<sup>1</sup>, Martin Tomanik<sup>2</sup>, Maria C. DiPoto<sup>2</sup>, Hui Li<sup>2</sup>, Xinping Han<sup>2,†</sup>, Qinghe Meng<sup>3</sup>, Robert N. Cooney<sup>3</sup>, Jimmy Wu<sup>2\*</sup>, George G. Holz<sup>1,4\*</sup>

Departments of Medicine<sup>1</sup>, Surgery<sup>3</sup>, and Pharmacology<sup>4</sup>, State University of New York (SUNY), Upstate Medical University, Syracuse, New York, USA

Department of Chemistry<sup>2</sup>, Dartmouth College, Hanover, New Hampshire, USA

<sup>†</sup>Current Address: Department of Biochemistry, UT Southwestern, Dallas TX 75390

### Table of Contents

|                                                                 |     |
|-----------------------------------------------------------------|-----|
| General Information.....                                        | S2  |
| Synthetic Experimental Procedures .....                         | S3  |
| Characterization of Cyclohepta[ <i>b</i> ]indole products ..... | S4  |
| Characterization of Cyclopenta[ <i>b</i> ]indole products ..... | S7  |
| References.....                                                 | S11 |
| NMR Spectra                                                     |     |
| JWU-A029 .....                                                  | S12 |
| JWU-A030 .....                                                  | S18 |
| JWU-A031 .....                                                  | S24 |
| JWU-A033 .....                                                  | S30 |
| JWU-A034 .....                                                  | S36 |
| (syn)-JWU-B007.....                                             | S42 |
| (anti)-JWU-B008 .....                                           | S47 |
| (syn)-JWU-B009.....                                             | S53 |
| (anti)-JWU-B010 .....                                           | S59 |
| (anti)-JWU-B011 .....                                           | S65 |
| (syn)-JWU-B012.....                                             | S71 |
| JWU-B014 .....                                                  | S77 |
| X-Ray Crystallography Data for (–)-JWU-A021 .....               | S82 |

### General Information

$^1\text{H}$  NMR data were recorded on a Bruker Avance III 500 MHz spectrometer (TBI probe) and Bruker Avance III 600 MHz (BBFO probe) with calibration spectra to  $\text{CHCl}_3$  (7.26 ppm) and  $\text{CH}_2\text{Cl}_2$  (5.32 ppm) at ambient temperature. Multiplicities are indicated as s (singlet), d (doublet), t (triplet), and m (multiplet).  $^{13}\text{C}$  NMR data were recorded at 125 MHz on Bruker Avance III 600 MHz spectrometer (BBFO probe) at ambient temperature and expressed in ppm using solvent as the internal standard  $\text{CD}_2\text{Cl}_2$  (53.84 ppm) and  $\text{CDCl}_3$  (77.16 ppm). IR spectra were recorded on Jasco FT-IR 4100 Series spectrophotometer,  $\nu_{\text{max}}$  ( $\text{cm}^{-1}$ ) are partially reported. Analytical thin layer chromatography (TLC) was performed on SILICYCLE pre-coated TLC plates (silica gel 60 F-254, 0.25mm). Flash column chromatography was performed on silica gel 60 (SILICYCLE 230–400 mesh). Visualization was accomplished with UV light and ceric ammonium molybdate (CAM). High-resolution mass spectroscopy data were acquired from Mass Spectrometry Laboratory of the University of Illinois (Urbana-Champaign, IL).

All reactions were carried out in oven-dried glassware with magnetic stirring. Solvents were freshly distilled. All reagents and starting materials were purchased from commercial vendors and used without further purification.

## Experimental Procedures

### *General Procedure A for the Synthesis of Cyclohepta[b]indoles*

A round-bottom flask was charged with indole (0.66 mmol, 1 equiv), aldehyde or ketone (1.32 mmol, 2 equiv), and diene (3.30 mmol, 5 equiv). Then, CH<sub>2</sub>Cl<sub>2</sub> (2.0 mL) was added followed by GaBr<sub>3</sub> (0.07 mmol, 0.1 equiv). The reaction was stirred at room temperature until it was complete as judged by thin layer chromatography. The volatiles were concentrated *in vacuo* and the residue was purified via silica gel flash chromatography (EtOAc/Hexanes) to yield the desired products.

### *General Procedure B for the Synthesis of Cyclopenta[b]indoles*

A round-bottom flask was charged with indole (0.66 mmol, 1 equiv), aldehyde or ketone (1.32 mmol, 2 equiv), and styrene (3.30 mmol, 5 equiv). Then, dichloroethane (2.0 mL) was added followed by TfOH (0.13 mmol, 0.2 equiv). The reaction was stirred at room temperature until it was complete as judged by thin layer chromatography. The volatiles were concentrated *in vacuo* and the residue was purified via silica gel flash chromatography (EtOAc/Hexanes) to yield the desired products.

## Characterization of Cyclohepta[b]indole products

The preparation of **JWU-A001** through **JWU-A021** were carried out as previously described.<sup>1</sup> All characterization data were identical to those previously reported.<sup>1</sup>

FIG. S1

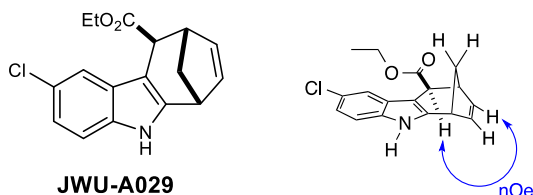

By following the general procedure **A** described above, **JWU-A029** was prepared in 43% yield. <sup>1</sup>H NMR (CD<sub>2</sub>Cl<sub>2</sub>, 600 MHz): δ, ppm 8.04 (1H, s), 7.40 (1H, d, J = 1.5 Hz), 7.14 (1H, d, J = 8.8 Hz), 6.93 (1H, dd, J = 2.5, 9.0 Hz), 6.34 (1H, dd, J = 3.0, 5.6 Hz), 5.85 (1H, dd, J = 3.0, 6.3 Hz), 4.13 (2H, q, J = 7.4 Hz), 3.47 (1H, d, J = 1.0 Hz), 3.40 (1H, dd, J = 3.3, 4.8 Hz), 3.19 (1H, t, J = 4.2 Hz), 2.28 (1H, d, J = 10.4 Hz), 2.13–2.09 (1H, m), 1.23 (3H, t, J = 8.3 Hz); <sup>13</sup>C NMR (CD<sub>2</sub>Cl<sub>2</sub>, 150 MHz): δ 173.6, 142.4, 140.5, 133.0, 131.6, 129.5, 125.2, 120.5, 117.9, 111.6, 101.6, 60.8, 42.3, 41.3, 39.6, 38.8, 14.0; IR (film, cm<sup>-1</sup>): 3401, 2957, 2846, 1713, 1644, 1468, 1259, 732; HRMS (ESI) calcd. for C<sub>17</sub>H<sub>16</sub>ClNO<sub>2</sub> (m/z M+H<sup>+</sup>): 302.0948, found: 302.0950.

FIG. S2

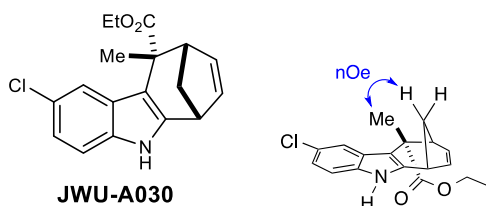

By following the general procedure **A** described above, **JWU-A030** was prepared in 57% yield. **<sup>1</sup>H NMR** (CD<sub>2</sub>Cl<sub>2</sub>, 600 MHz): δ, ppm 8.01 (1H, s), 7.29 (1H, d, J = 2.1 Hz), 7.13 (1H, d, J = 9.0 Hz), 6.91 (1H, dd, J = 1.7, 8.0 Hz), 6.36 (1H, dd, J = 3.0, 5.4 Hz), 5.70 (1H, dd, J = 3.2, 5.2 Hz), 4.17–4.11 (1H, m), 4.06–3.98 (1H, m), 3.29 (1H, t, J = 3.7 Hz), 3.01 (1H, dd, J = 3.0, 4.8 Hz), 2.24 (2H, m, J = 4.9 Hz), 2.07 (1H, d, J = 9.9 Hz), 1.63 (3H, s), 1.16 (2H, t, J = 6.7 Hz); **<sup>13</sup>C NMR** (CD<sub>2</sub>Cl<sub>2</sub>, 150 MHz): δ 175.2, 140.7, 140.4, 132.9, 131.5, 129.0, 124.7, 120.1, 119.0, 111.7, 108.0, 60.5, 49.9, 46.1, 40.9, 39.0, 25.7, 14.0; **IR** (film, cm<sup>-1</sup>): 3455, 3048, 2981, 1720, 1637, 1451, 1262, 736; **HRMS (ESI) calcd.** for C<sub>18</sub>H<sub>18</sub>ClNO<sub>2</sub> (m/z M+H<sup>+</sup>): 316.1104, found: 316.1104.

FIG. S3

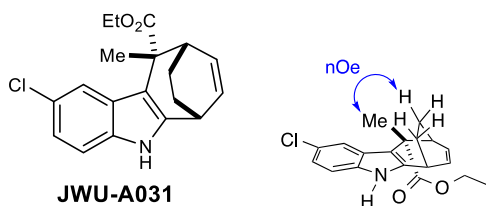

By following the general procedure **A** described above, **JWU-A031** was prepared in 11% yield. **<sup>1</sup>H NMR** (CD<sub>2</sub>Cl<sub>2</sub>, 600 MHz): δ, ppm 7.84 (1H, s), 7.31 (1H, d, J = 2.0 Hz), 7.13 (1H, d, J = 9.4 Hz), 6.93 (1H, dd, J = 2.2, 8.6 Hz), 6.45 (1H, dd, J = 8.0, 8.0 Hz), 6.00 (1H, t, J = 8.0 Hz), 4.11–4.05 (1H, m), 4.02–3.96 (1H, m), 3.24 (1H, t, J = 4.4 Hz), 2.87 (1H, t, J = 7.6 Hz), 2.08–1.96 (2H, m), 1.85–1.78 (1H, m), 1.71–1.65 (1H, m), 1.64 (3H, s), 1.12 (3H, t, J = 7.8 Hz); **<sup>13</sup>C NMR** (CD<sub>2</sub>Cl<sub>2</sub>, 150 MHz): δ 175.6, 139.3, 135.9, 132.7, 130.9, 130.4, 124.6, 120.7, 120.6, 119.9, 110.6, 60.7, 42.2, 34.2, 30.2, 24.3, 19.0, 14.1, 14.0; **IR** (film, cm<sup>-1</sup>): 3399, 2923, 2853, 1720, 1637, 796; **HRMS (ESI) calcd.** for C<sub>19</sub>H<sub>20</sub>ClNO<sub>2</sub> (m/z M+H<sup>+</sup>): 330.1261, found: 330.1254.

FIG. S4

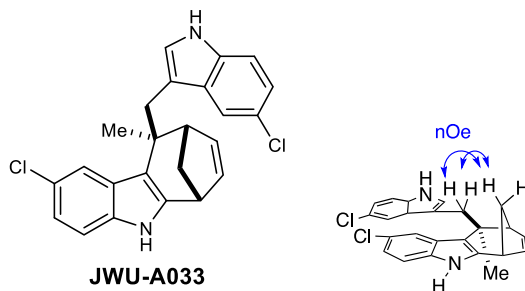

By following the general procedure **A** described above, **JWU-A033** was prepared in 25% yield.  $^1\text{H NMR}$  ( $\text{CD}_2\text{Cl}_2$ , 600 MHz):  $\delta$ , ppm 8.18 (1H, s), 7.95 (1H, s), 7.38 (1H, d,  $J = 1.6$  Hz), 7.24 (1H, d,  $J = 8.1$  Hz), 7.14 (2H, d,  $J = 8.9$  Hz), 7.01 (1H, dd,  $J = 2.8, 8.9$  Hz), 6.94 (1H, d,  $J = 2.8$  Hz), 6.88 (1H, dd,  $J = 2.0, 8.1$  Hz), 6.32 (1H, dd,  $J = 3.1, 5.1$  Hz), 5.71 (1H, dd,  $J = 3.4, 5.5$  Hz), 3.29 (1H, d,  $J = 15.7$  Hz), 3.27 (1H, dd,  $J = 3.3, 3.3$  Hz), 3.11 (1H, d,  $J = 14.2$  Hz), 2.70 (1H, dd,  $J = 3.3, 4.8$  Hz), 2.25 (1H, d,  $J = 8.4$  Hz), 2.12–2.08 (1H, m), 1.19 (3H, d,  $J = 11.3$  Hz);  $^{13}\text{C NMR}$  ( $\text{CD}_2\text{Cl}_2$ , 150 MHz):  $\delta$  140.9, 139.6, 134.4, 133.1, 132.8, 130.2, 128.7, 125.4, 124.8, 124.4, 121.6, 119.7, 118.7, 118.6, 113.0, 112.1, 112.0, 111.6, 48.8, 40.2, 40.1, 39.0, 37.0, 21.7; **IR** (film,  $\text{cm}^{-1}$ ): 3427, 2920, 2853, 1648, 1436, 1098, 737; **HRMS (ESI) calcd.** for  $\text{C}_{24}\text{H}_{20}\text{Cl}_2\text{N}_2$  ( $m/z$   $\text{M}+\text{H}^+$ ): 407.1082, found: 407.1074.

FIG. S5

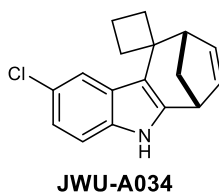

By following the general procedure **A** described above, **JWU-A034** was prepared in 58% yield.  $^1\text{H NMR}$  ( $\text{CD}_2\text{Cl}_2$ , 600 MHz):  $\delta$ , ppm 7.87 (1H, s), 7.63 (1H, d,  $J = 2.5$  Hz), 7.14 (1H, d,  $J = 8.6$  Hz), 6.92 (1H, dd,  $J = 2.7, 8.4$  Hz), 6.43 (1H, dd,  $J = 2.9, 5.9$  Hz), 5.85 (1H, dd,  $J = 3.5, 5.3$  Hz), 3.22 (1H, dd,  $J = 3.0, 3.9$  Hz), 3.19 (1H, dd,  $J = 3.2, 5.2$  Hz), 2.69–2.63

(1H, m), 2.56–2.50 (1H, m), 2.20–2.07 (3H, m), 2.06–1.99 (2H, m), 1.92 (1H, d, J = 10.8 Hz);  $^{13}\text{C}$  NMR (CD<sub>2</sub>Cl<sub>2</sub>, 150 MHz):  $\delta$  142.0, 141.3, 133.2, 131.7, 128.9, 124.7, 119.8, 117.6, 111.8, 111.6, 49.8, 41.6, 41.1, 39.1, 35.3, 27.5, 15.0; IR (film, cm<sup>-1</sup>): 3399, 2923, 2853, 1644, 1467, 1439, 1067, 741; HRMS (ESI) calcd. for C<sub>17</sub>H<sub>16</sub>ClN (m/z M+H<sup>+</sup>): 270.1050, found: 270.1050.

**Characterization of Cyclopenta[b]indole products**

FIG. S6

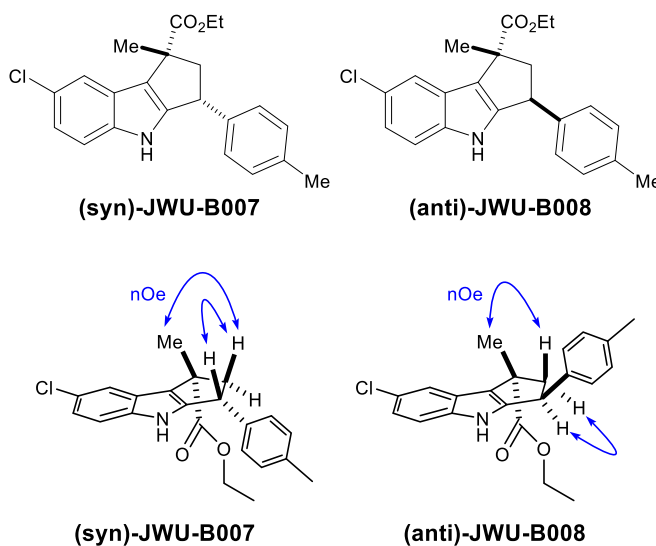

By following the general procedure **B** described above, a 1:1 diastereomeric mixture (**syn**)-**JWU-B007** and (**anti**)-**JWU-B008** was prepared in 65% combined yield. For (**syn**)-**JWU-B007**,  $^1\text{H}$  NMR (CD<sub>2</sub>Cl<sub>2</sub>, 600 MHz):  $\delta$ , ppm 7.82 (1H, s), 7.57 (1H, d, J = 2.1 Hz), 7.12 (1H, d, J = 8.8 Hz), 7.04 (2H, d, J = 8.0 Hz), 6.99 (3H, ddd, J = 8.8, 8.8, 3.5 Hz), 4.36 (1H, dd, J = 6.9, 8.0 Hz), 4.12–4.07 (2H, m), 2.94 (1H, dd, J = 7.0, 13.5 Hz), 2.74 (1H, dd, J = 8.6, 13.3 Hz), 2.23 (3H, s), 1.54 (3H, s), 1.20 (3H, t, J = 7.9 Hz);  $^{13}\text{C}$  NMR (CD<sub>2</sub>Cl<sub>2</sub>, 150 MHz):  $\delta$  176.0, 146.0, 139.9, 139.4, 136.6, 129.3, 127.4, 125.2, 124.6, 122.7, 121.2, 118.8, 112.5, 60.9, 51.5, 49.3, 43.3, 25.1, 20.7, 14.0; IR (film, cm<sup>-1</sup>):

3423, 2923, 2860, 1644, 1449, 1289, 1025, 789; **HRMS (ESI) calcd.** for C<sub>22</sub>H<sub>22</sub>ClNO<sub>2</sub> (m/z M+H<sup>+</sup>): 368.1417, found: 368.1417; **For (anti)-JWU-B008**, <sup>1</sup>H NMR (CD<sub>2</sub>Cl<sub>2</sub>, 600 MHz): δ, ppm 7.83 (1H, s), 7.54 (1H, d, J = 1.5 Hz), 7.13 (1H, d, J = 8.9 Hz), 7.06 (2H, d, J = 7.5 Hz), 7.00 (3H, ddd, J = 5.7, 5.7, 13.9 Hz), 4.49 (1H, t, J = 7.9 Hz), 4.06–4.00 (2H, m), 3.54 (1H, dd, J = 9.0, 13.2 Hz), 2.25 (3H, s), 2.11 (1H, dd, J = 8.2, 12.9 Hz), 1.65 (3H, s), 1.15 (3H, t, J = 8.2 Hz); <sup>13</sup>C NMR (CD<sub>2</sub>Cl<sub>2</sub>, 150 MHz): δ 175.7, 146.7, 140.2, 139.3, 136.6, 129.4, 127.4, 125.2, 124.7, 122.5, 121.1, 118.3, 112.6, 60.9, 52.7, 49.5, 44.2, 25.2, 20.7, 14.0; **IR** (film, cm<sup>-1</sup>): 3421, 2918, 2853, 1640, 1374, 1287, 861; **HRMS (ESI) calcd.** for C<sub>22</sub>H<sub>22</sub>ClNO<sub>2</sub> (m/z M+H<sup>+</sup>): 368.1417, found: 368.1409.

FIG. S7

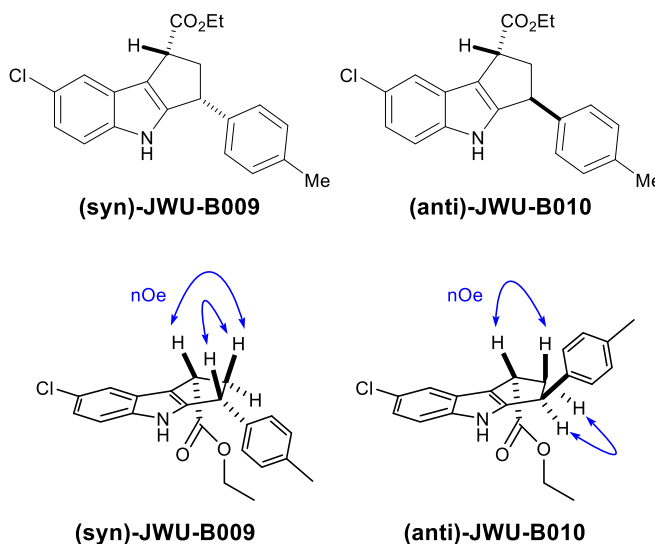

By following the general procedure **B** described above, a 1:1 diastereomeric mixture **(syn)-JWU-B009** and **(anti)-JWU-B010** as prepared in 44% combined yield. **For (syn)-JWU-B009**, <sup>1</sup>H NMR (CD<sub>2</sub>Cl<sub>2</sub>, 600 MHz): δ, ppm 7.87 (1H, s), 7.54 (1H, s), 7.13 (1H, d, J = 8.3 Hz), 7.05 (4H, s), 7.00 (1H, d, J = 6.7 Hz), 4.32 (1H, dd, J = 7.6, 7.6 Hz), 4.15 (2H, dd, J = 6.4, 14.6 Hz), 4.03 (1H, dd, J = 7.0, 7.0 Hz), 3.19–3.13 (1H, m), 2.67–2.61 (1H, m), 2.23



(3H, s), 1.25 (3H, t,  $J = 7.2$  Hz);  $^{13}\text{C-NMR}$  ( $\text{CD}_2\text{Cl}_2$ , 150 MHz):  $\delta$  173.6, 147.5, 140.0, 139.5, 136.7, 129.3, 127.5, 125.3, 125.1, 121.3, 118.8, 117.4, 112.5, 60.9, 44.0, 43.1, 42.7, 20.7, 14.1; **IR** (film,  $\text{cm}^{-1}$ ): 3583, 3357, 2916, 2850, 1713, 1289, 1070, 657; **HRMS (ESI) calcd.** for  $\text{C}_{21}\text{H}_{20}\text{ClNO}_2$  ( $m/z$   $\text{M}+\text{H}^+$ ): 354.1261, found: 354.1253; **For (anti)-JWU-B010**,  $^1\text{H NMR}$  ( $\text{CD}_2\text{Cl}_2$ , 600 MHz):  $\delta$ , ppm 7.89 (1H, s), 7.51 (1H, d,  $J = 2.2$  Hz), 7.13 (1H, d,  $J = 9.1$  Hz), 7.03 (2H, d,  $J = 8.0$  Hz), 6.99 (1H, dd,  $J = 2.2, 8.8$  Hz), 6.95 (2H, d,  $J = 8.0$  Hz), 4.48 (1H, dd,  $J = 7.3, 7.3$  Hz), 4.13–4.07 (3H, m), 3.30–3.24 (1H, m), 2.52–2.47 (1H, m), 2.23 (3H, s), 1.22 (3H, t,  $J = 8.1$  Hz);  $^{13}\text{C NMR}$  ( $\text{CD}_2\text{Cl}_2$ , 150 MHz):  $\delta$  173.7, 147.9, 140.3, 139.4, 136.6, 129.4, 127.1, 125.3, 125.0, 121.3, 118.6, 117.5, 112.6, 60.9, 43.9, 43.5, 42.9, 20.6, 14.1; **IR**(film,  $\text{cm}^{-1}$ ): 3359, 2919, 2846, 1707, 1640, 1204, 1037, 857, 726; **HRMS (ESI) calcd.** for  $\text{C}_{21}\text{H}_{20}\text{ClNO}_2$  ( $m/z$   $\text{M}+\text{H}^+$ ): 354.1261, found: 354.1261.

FIG. S8

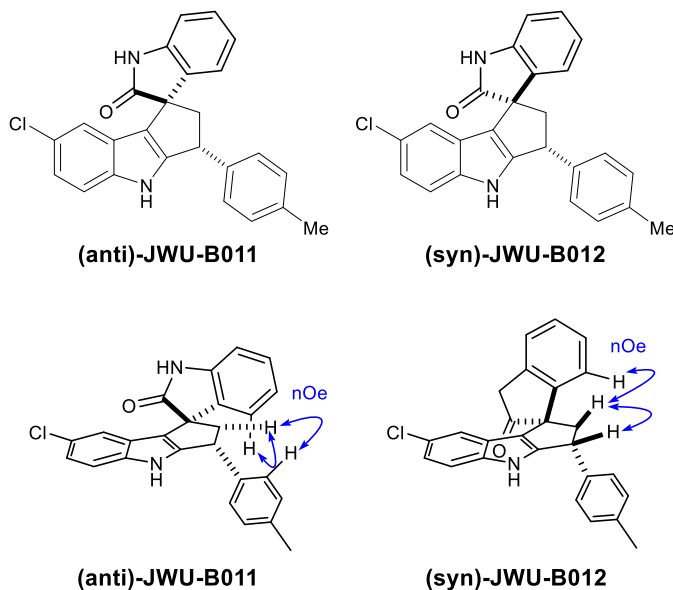

By following the general procedure **B** described above, a 1:1 diastereomeric mixture of **(anti)-JWU-B011** and **(syn)-JWU-B012** was prepared in 27% combined yield. **For (anti)-JWU-B011**,  $^1\text{H NMR}$  ( $\text{CD}_2\text{Cl}_2$ , 600 MHz):  $\delta$ , ppm 8.01 (1H, s), 7.69 (1H, s), 7.25

(2H, d,  $J = 8.8$  Hz), 7.18–7.10 (4H, m), 7.01 (1H, d,  $J = 7.7$  Hz), 6.94 (1H, dd,  $J = 2.1, 8.8$  Hz), 6.90 (2H, dd,  $J = 7.0, 7.0$  Hz), 6.85 (1H, s), 4.76 (1H, t,  $J = 8.0$  Hz), 3.11 (1H, dd,  $J = 8.0, 13.9$  Hz), 2.96 (1H, dd,  $J = 8.8, 14.6$  Hz), 2.26 (3H, s);  $^{13}\text{C NMR}$  ( $\text{CD}_2\text{Cl}_2$ , 150 MHz):  $\delta$  180.3, 148.9, 139.9, 139.6, 139.5, 137.0, 134.6, 129.4, 128.0, 127.8, 125.4, 123.4, 123.3, 122.7, 121.7, 120.1, 117.1, 112.8, 109.6, 54.0, 52.5, 44.5, 20.7; **IR** (film,  $\text{cm}^{-1}$ ): 3397, 2918, 2360, 1709, 1465, 1290, 1098, 805; **HRMS (ESI) calcd.** for  $\text{C}_{25}\text{H}_{19}\text{ClN}_2\text{O}$  ( $m/z$   $\text{M}+\text{H}^+$ ): 399.1261, found: 399.1257; **For (syn)-JWU-B012**,  $^1\text{H NMR}$  ( $\text{CDCl}_3$ , 600 MHz):  $\delta$ , ppm 7.92 (1H, s), 7.47 (1H, s), 7.19 (3H, s), 7.11 (2H, ddt,  $J = 6.7, 6.7, 6.7$  Hz), 6.99–6.94 (3H, m), 6.90 (2H, d,  $J = 7.8$  Hz), 6.69 (1H, d,  $J = 1.7$  Hz), 4.86 (1H, t,  $J = 8.8$  Hz), 3.38 (1H, ddd,  $J = 6.8, 6.8, 6.8$  Hz), 2.63 (1H, dd,  $J = 9.6, 14.4$  Hz), 2.30 (3H, s);  $^{13}\text{C NMR}$  ( $\text{CDCl}_3$ , 150 MHz):  $\delta$  180.6, 148.6, 139.7, 139.6, 139.2, 137.1, 134.5, 129.6, 128.1, 127.9, 125.7, 123.6, 123.4, 122.9, 121.9, 120.1, 117.6, 112.6, 109.6, 54.1, 52.6, 44.6, 21.0; **IR** (film,  $\text{cm}^{-1}$ ): 3273, 3186, 2923, 1692, 1619, 1468, 1339, 816; **HRMS (ESI) calcd.** for  $\text{C}_{25}\text{H}_{19}\text{ClN}_2\text{O}$  ( $m/z$   $\text{M}+\text{H}^+$ ): 399.1261, found: 399.1249.

*FIG. S9*

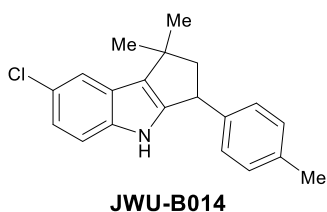

By following the general procedure **B** described above, **JWU-B014** was prepared in 25% yield.  $^1\text{H NMR}$  ( $\text{CDCl}_3$ , 600 MHz):  $\delta$ , ppm 7.70 (1H, s), 7.43 (1H, s), 7.12 (1H, d,  $J = 7.9$  Hz), 7.03 (4H, dd,  $J = 8.3, 22.8$  Hz), 6.96 (1H, dd,  $J = 1.4, 8.9$  Hz), 4.39 (1H, t,  $J = 7.7$  Hz), 2.71 (1H, dd,  $J = 8.8, 12.4$  Hz), 2.23 (3H, s), 2.15 (1H, dd,  $J = 7.3, 11.7$  Hz), 1.42 (3H, s), 1.31 (3H, s);  $^{13}\text{C NMR}$  ( $\text{CDCl}_3$ , 150 MHz):  $\delta$  144.7, 140.9, 139.4, 136.3, 129.3, 128.4,

127.7, 124.7, 124.5, 120.6, 117.6, 112.5, 57.2, 44.1, 39.3, 29.4, 28.5, 20.7; **IR** (film,  $\text{cm}^{-1}$ ); 3418, 2923, 2853, 1633, 1443, 1287, 1044, 812; **HRMS (ESI) calcd.** for  $\text{C}_{20}\text{H}_{20}\text{ClN}$  ( $m/z$   $\text{M}+\text{H}^+$ ); 310.1363, found: 310.1363.

1. Han, X.; Li, H.; Hughes, R. P.; Wu, J. Gallium(III)-Catalyzed Three-Component (4+3) Cycloaddition Reactions. *Angew. Chem. Int. Ed.* **2012**, *52*, 10390–10393.

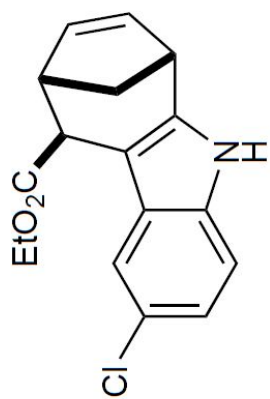

**JWU-A029**

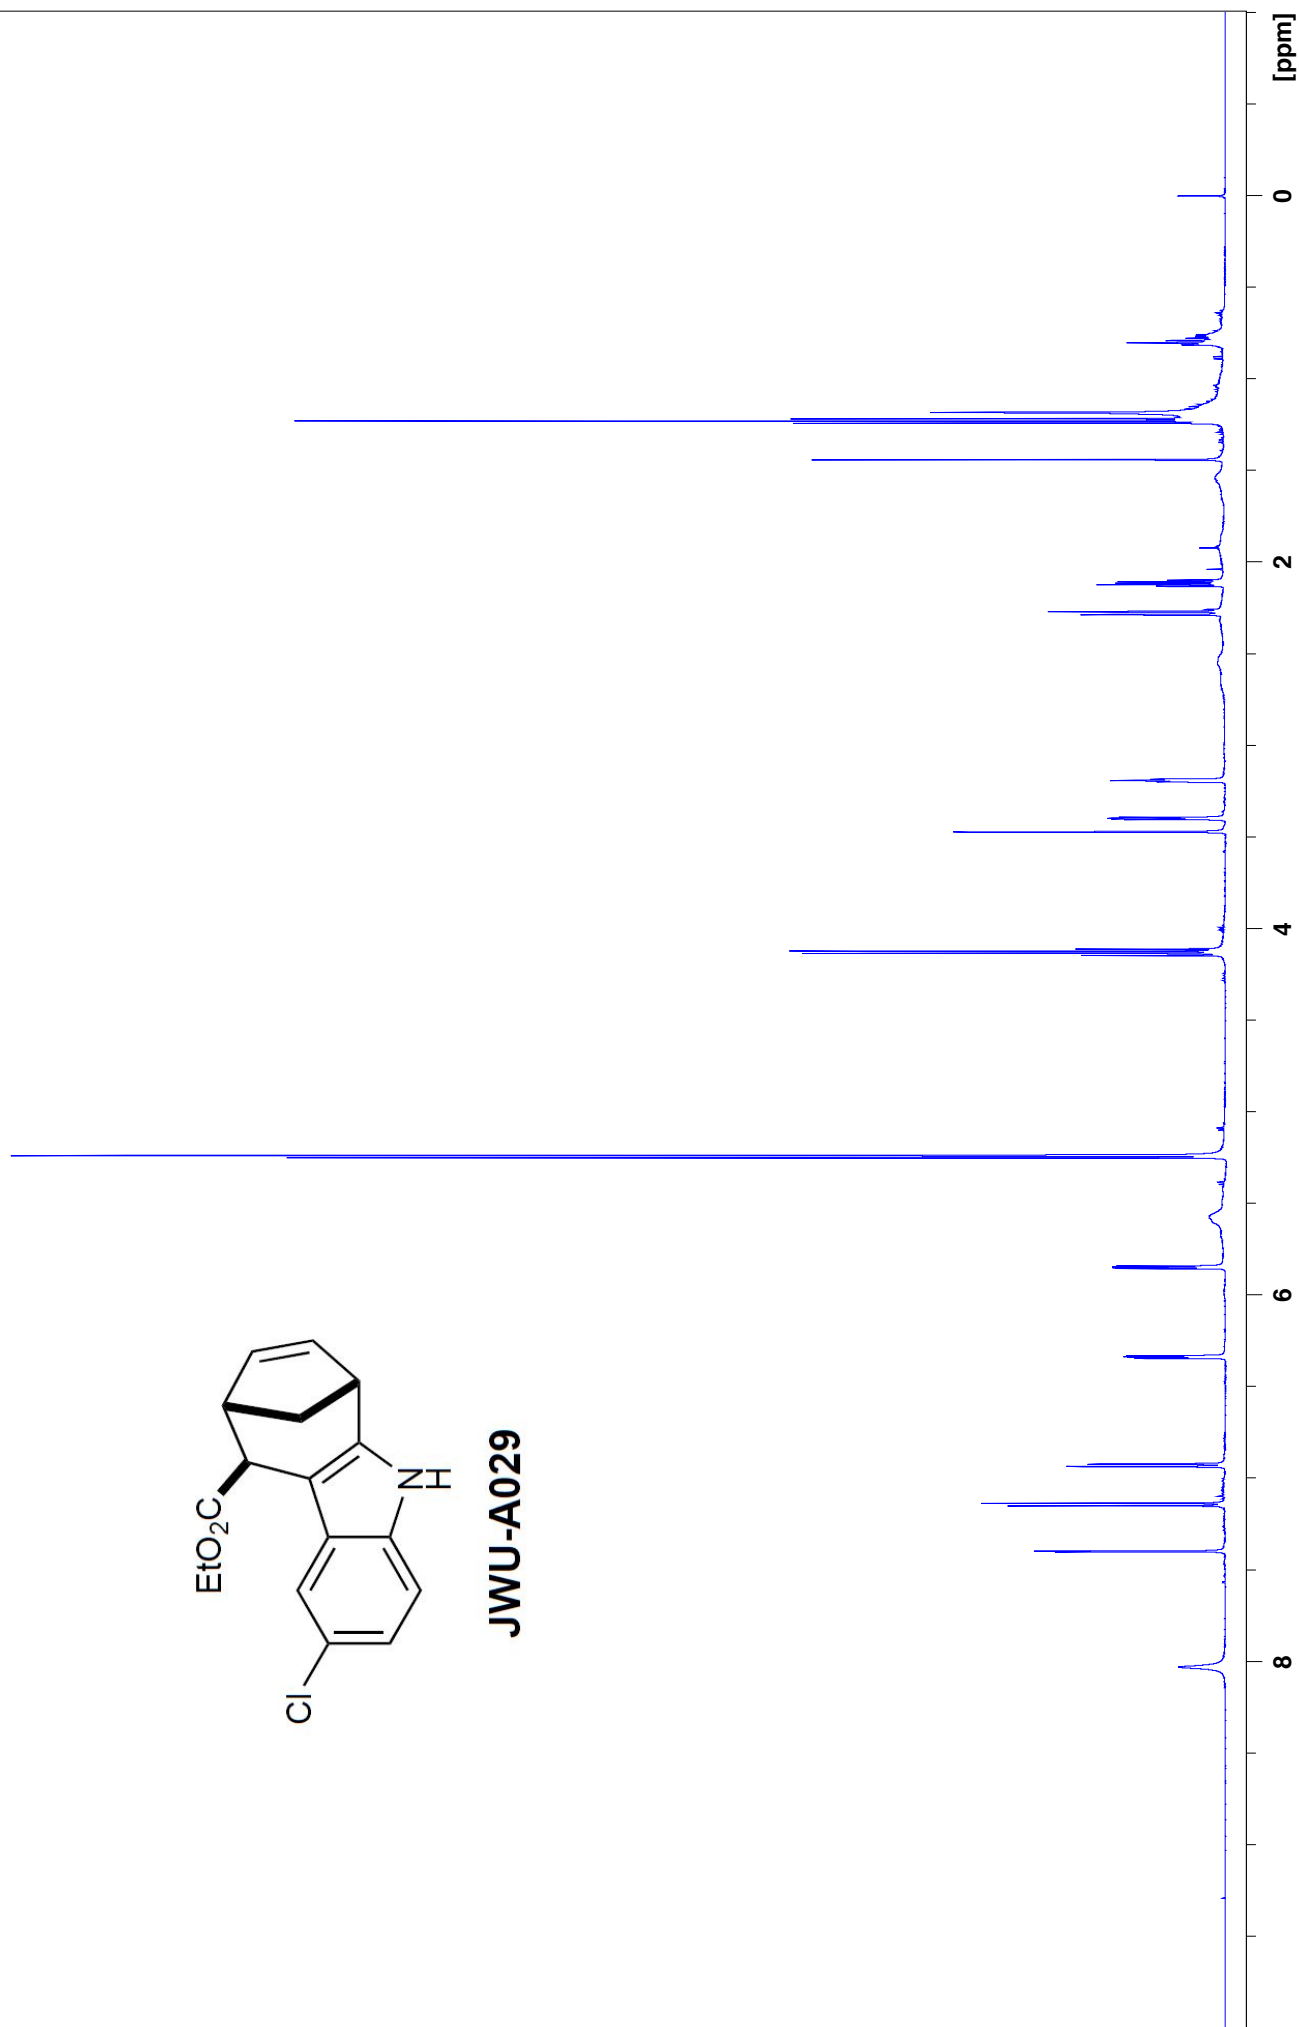

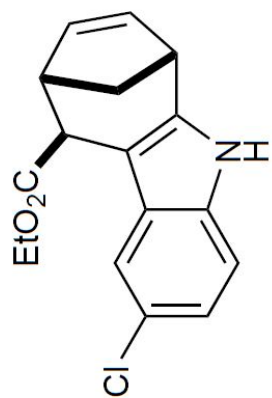

**JWU-A029**

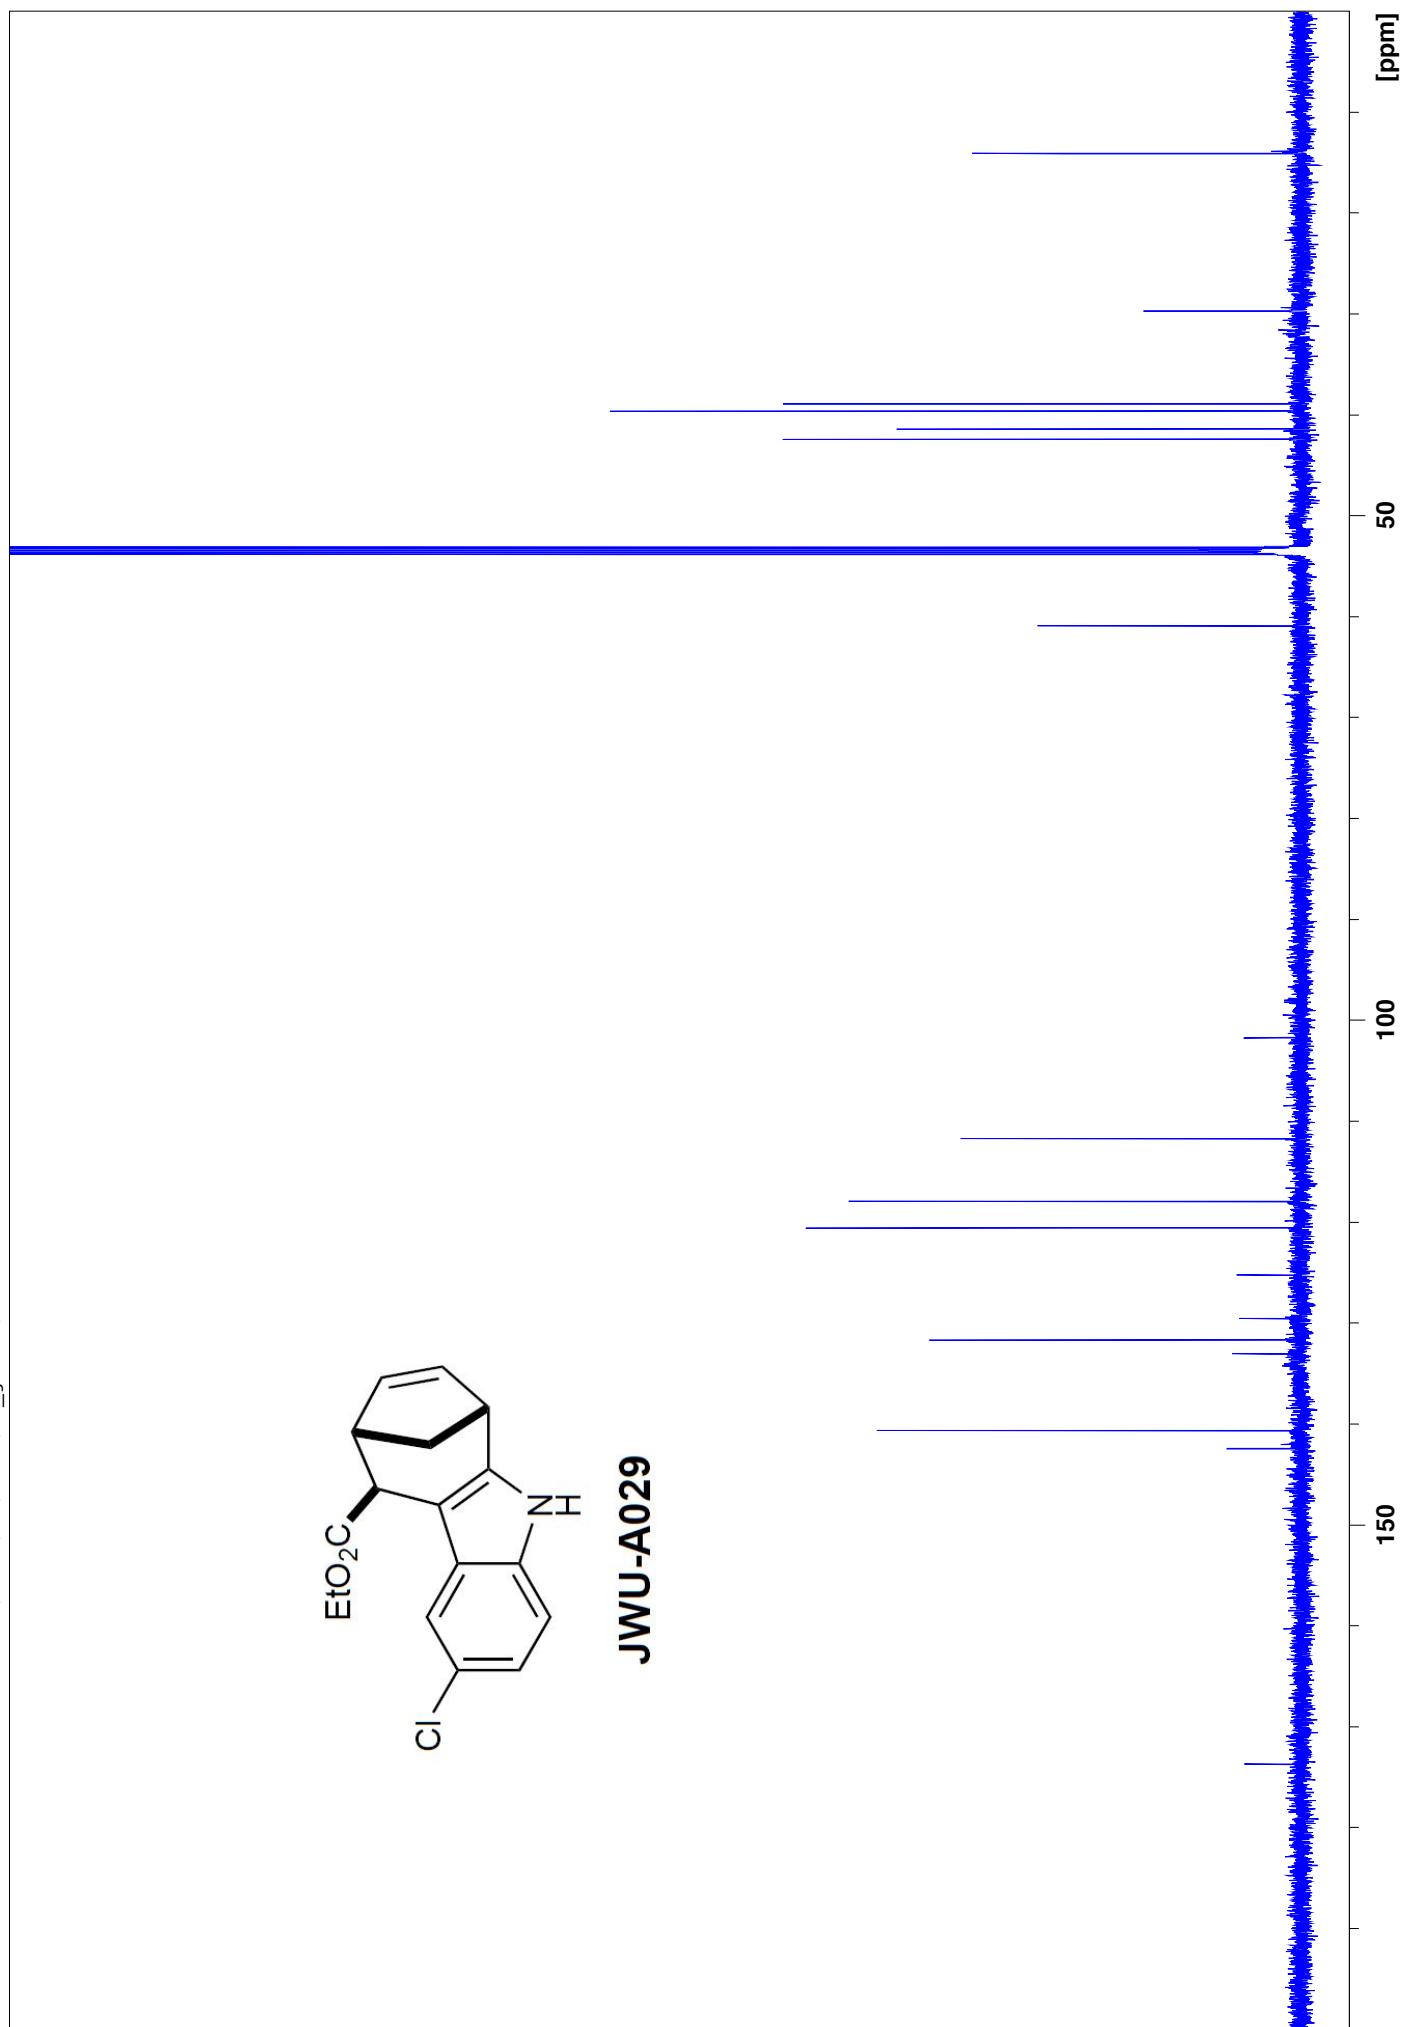

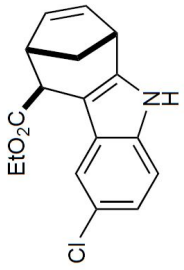

JWU-A029

MT-N3-P106-TT29-8-4-5 12 1 N:\b600\wu\data\wu\_guest\nmr

HMQC

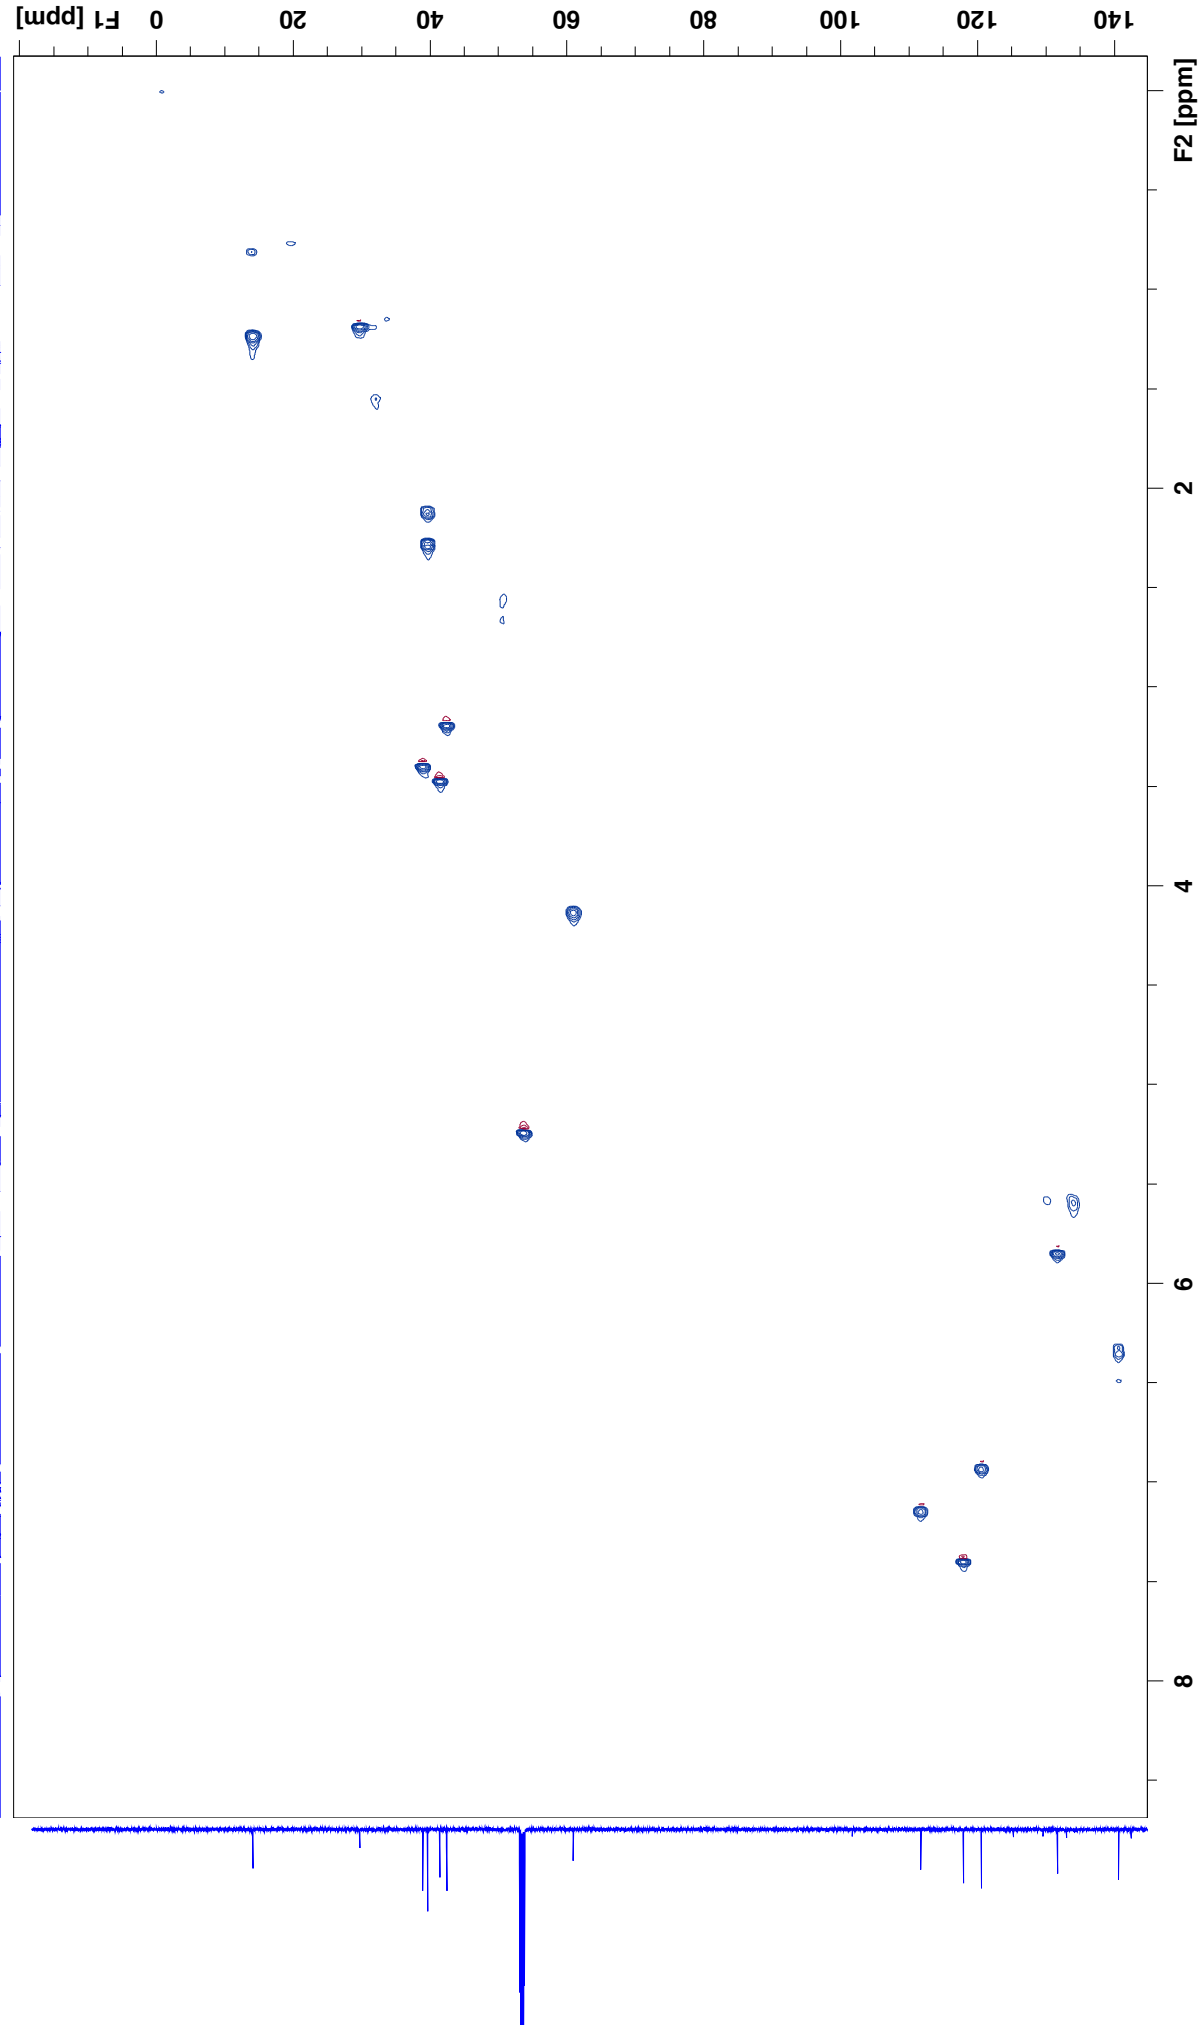

S14

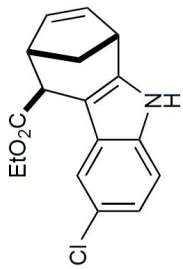

JWU-A029

MT-N3-P106-TT29-8-4-5 13 1 N:\b600\wu\data\wu\_guest\nmr

HMBC

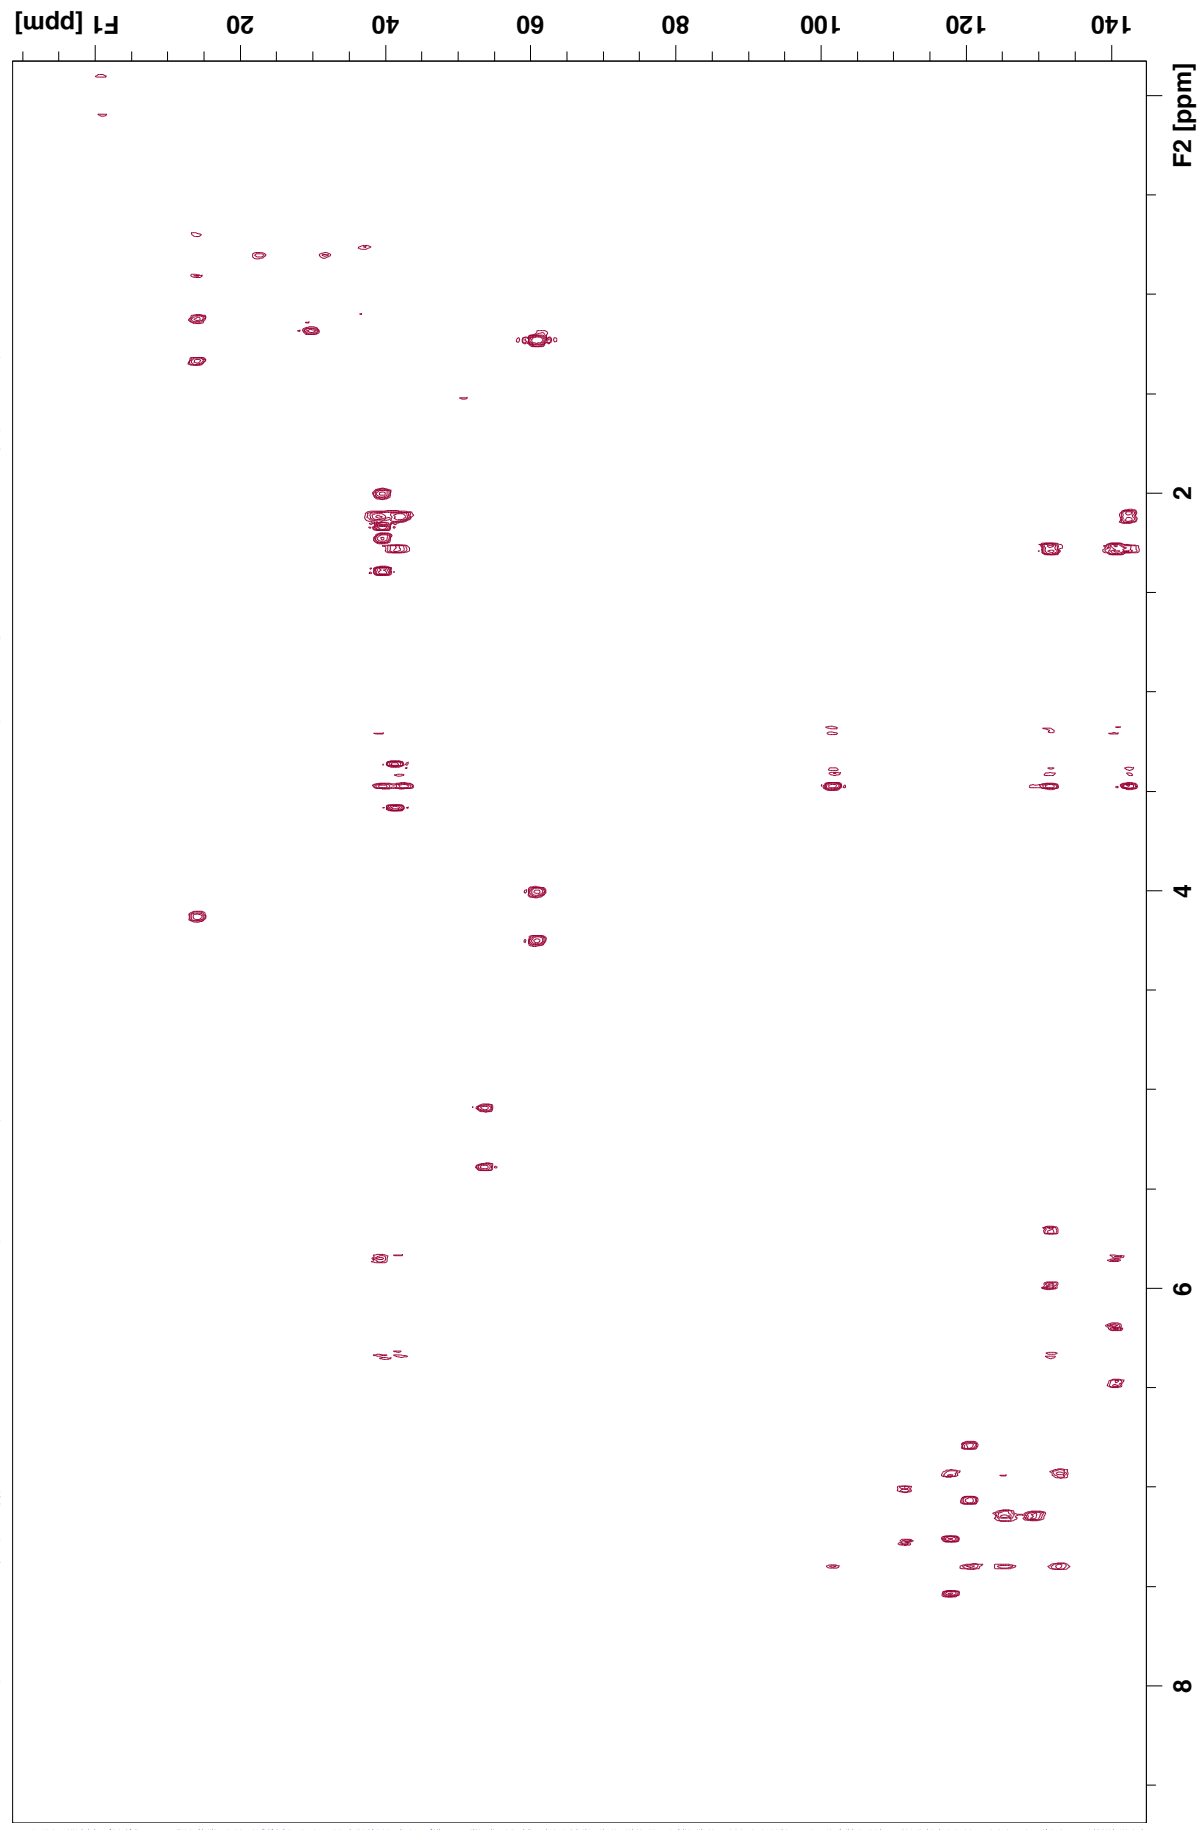

S15

MT-N3-P106-TT29-8-4-5 14 1 N:\b600\wu\data\wu\_guest\nmr

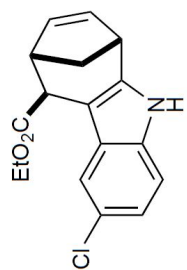

JWU-A029

COSY

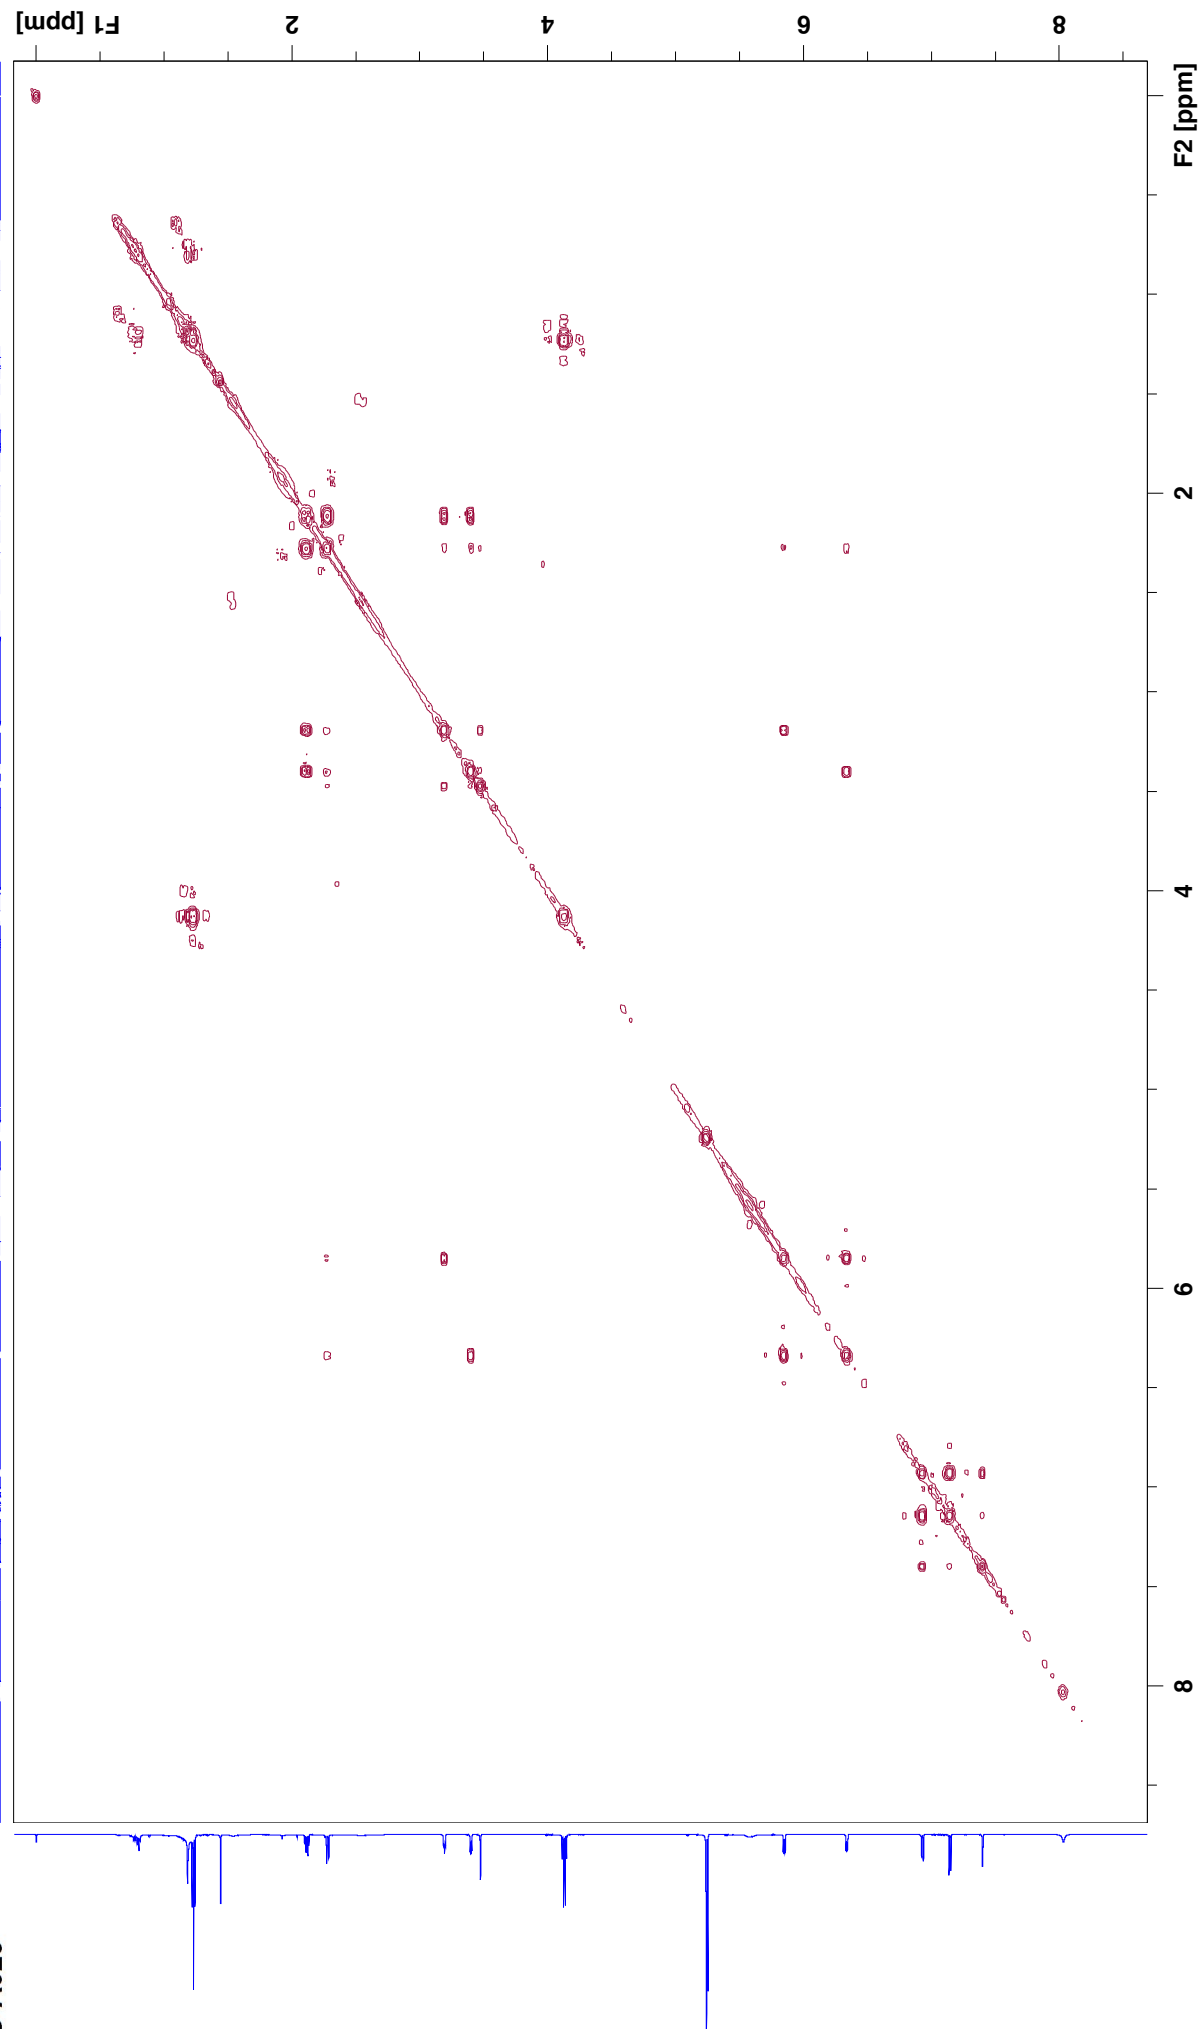



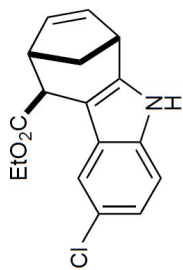

JWU-A029

MT-N3-P106-TR29-8-4-5 15 1 N:\b600\wu\data\wu\_guest\nmr

# NOESY

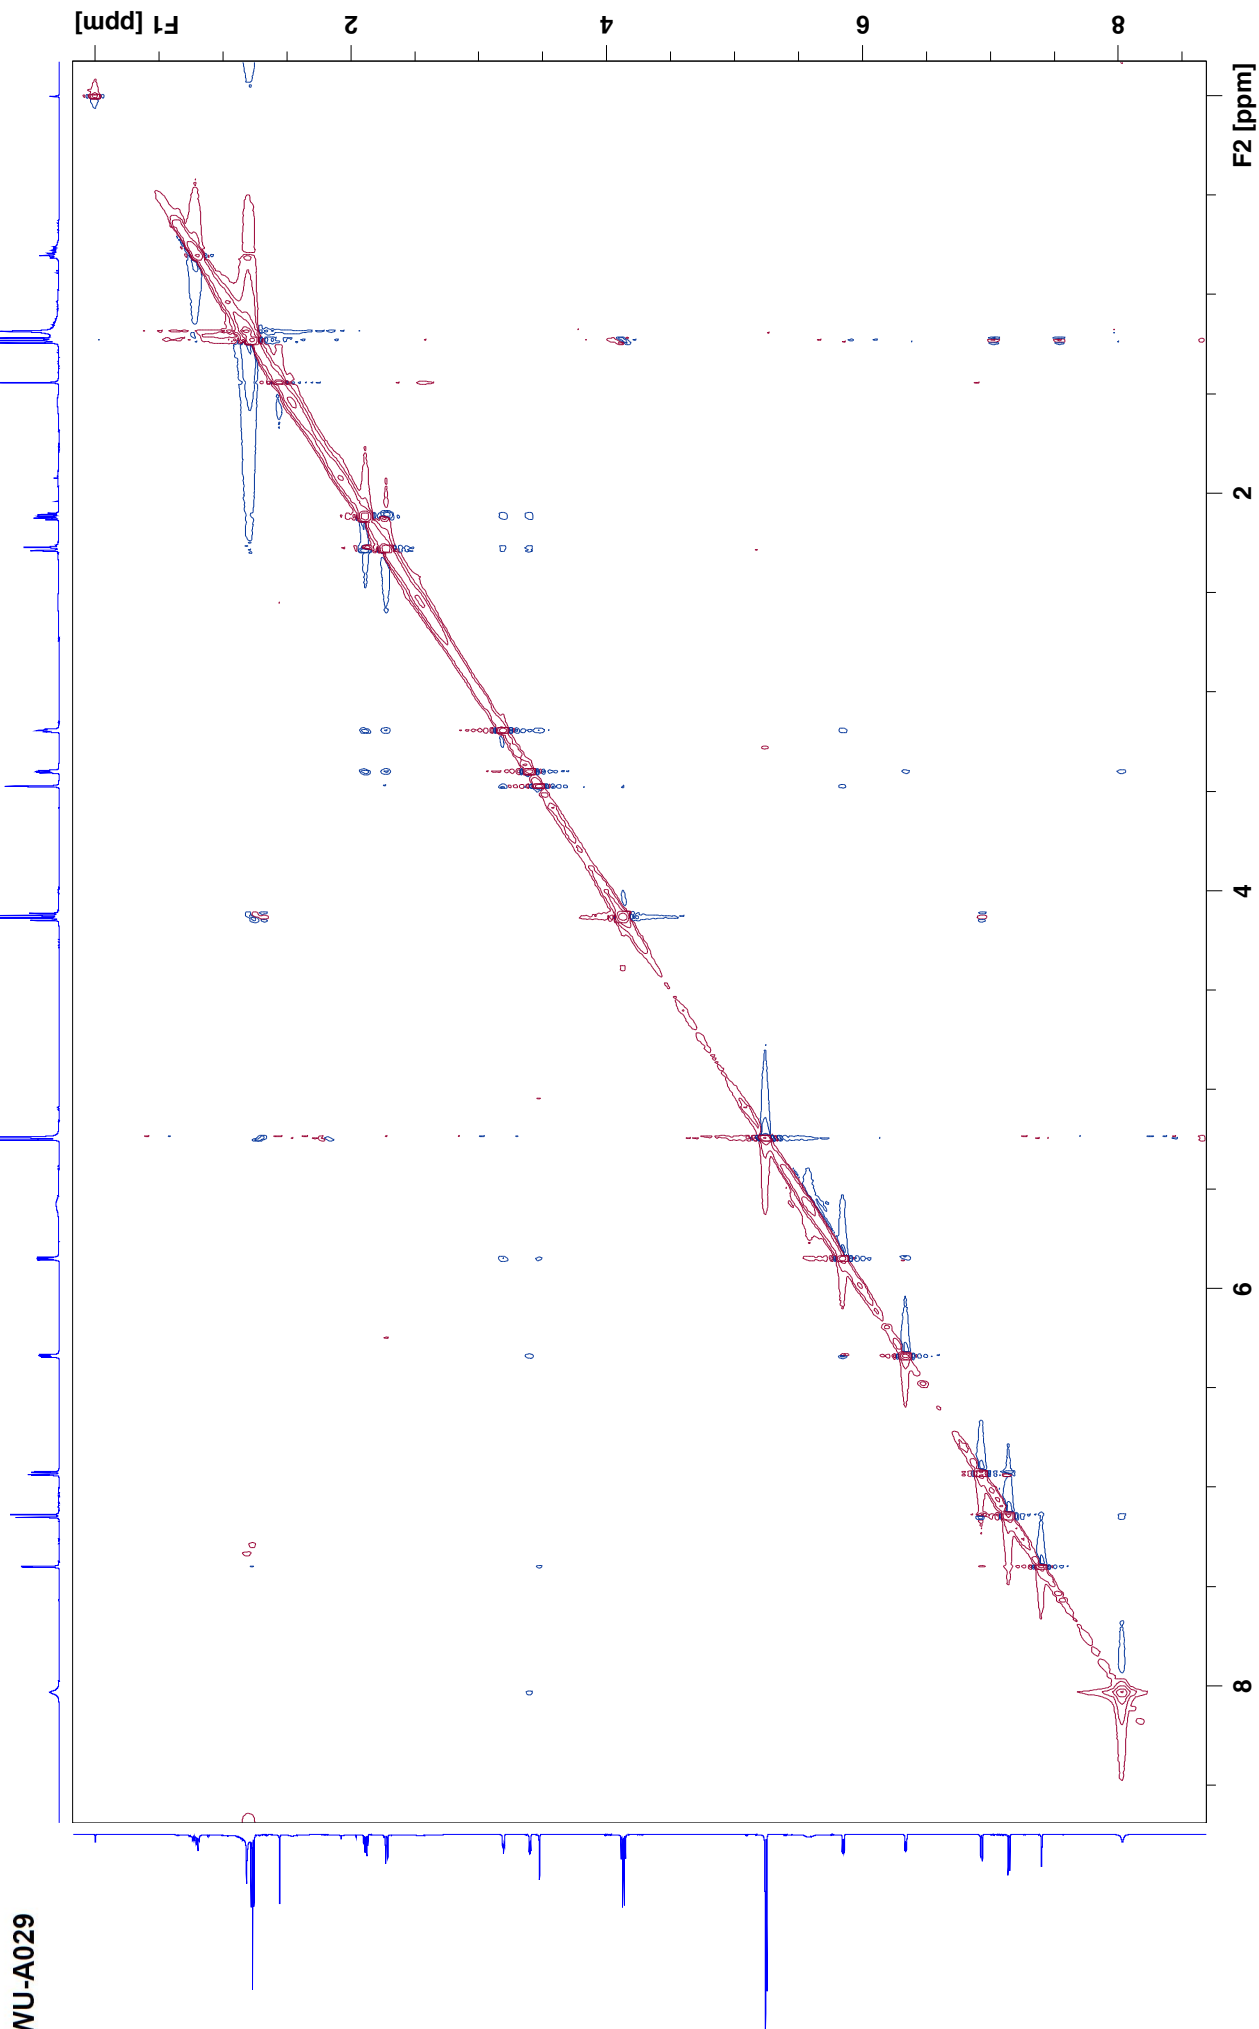

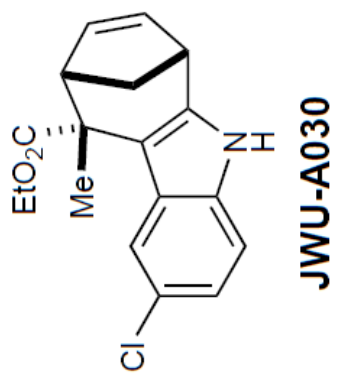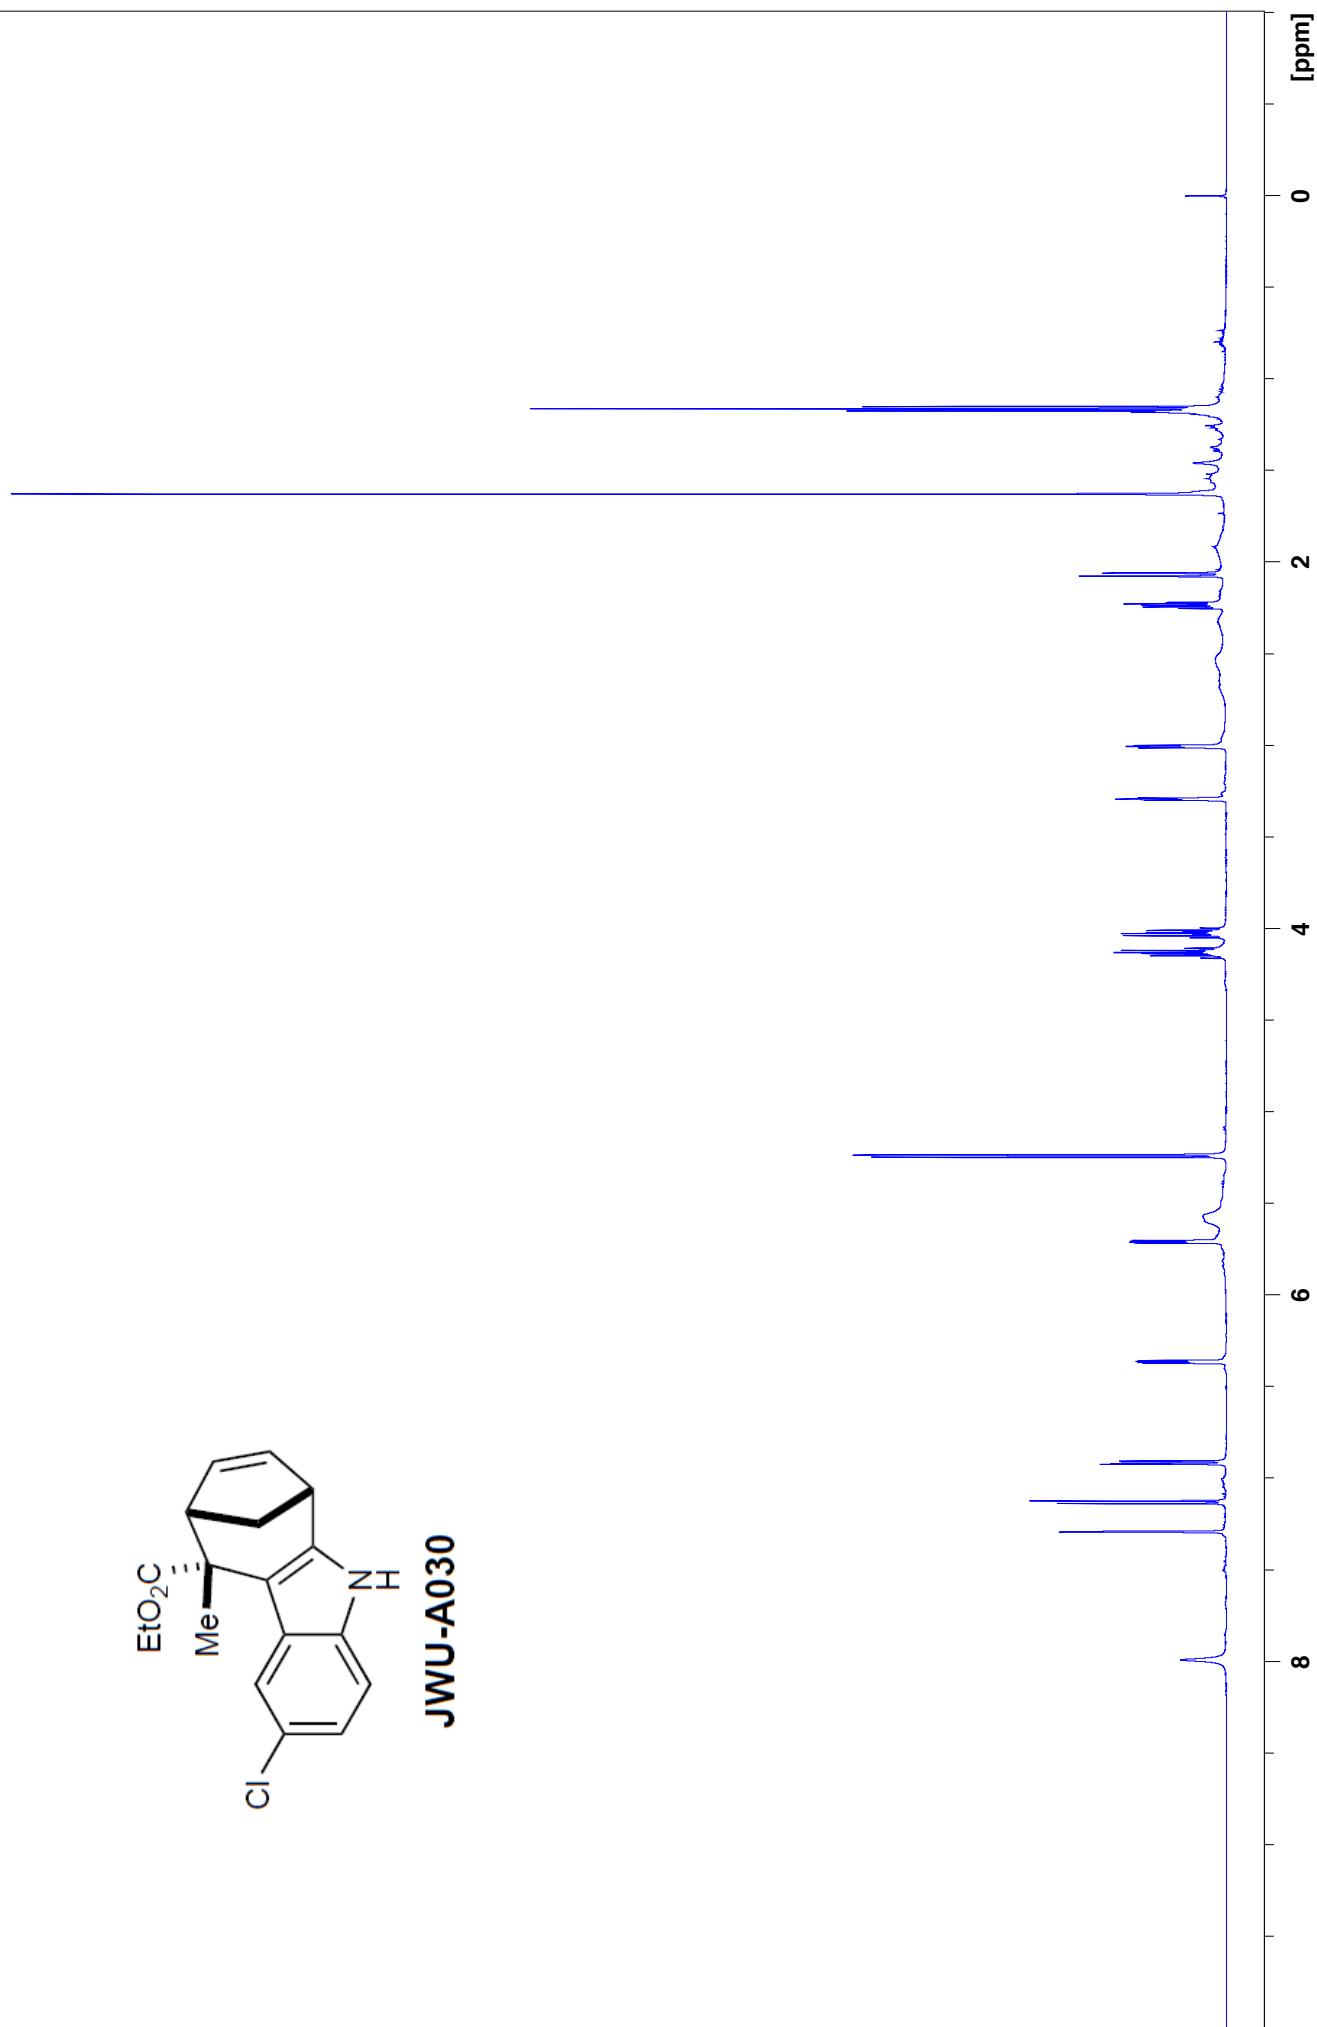

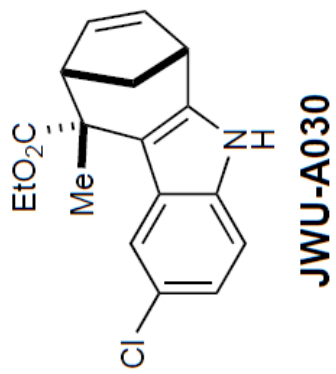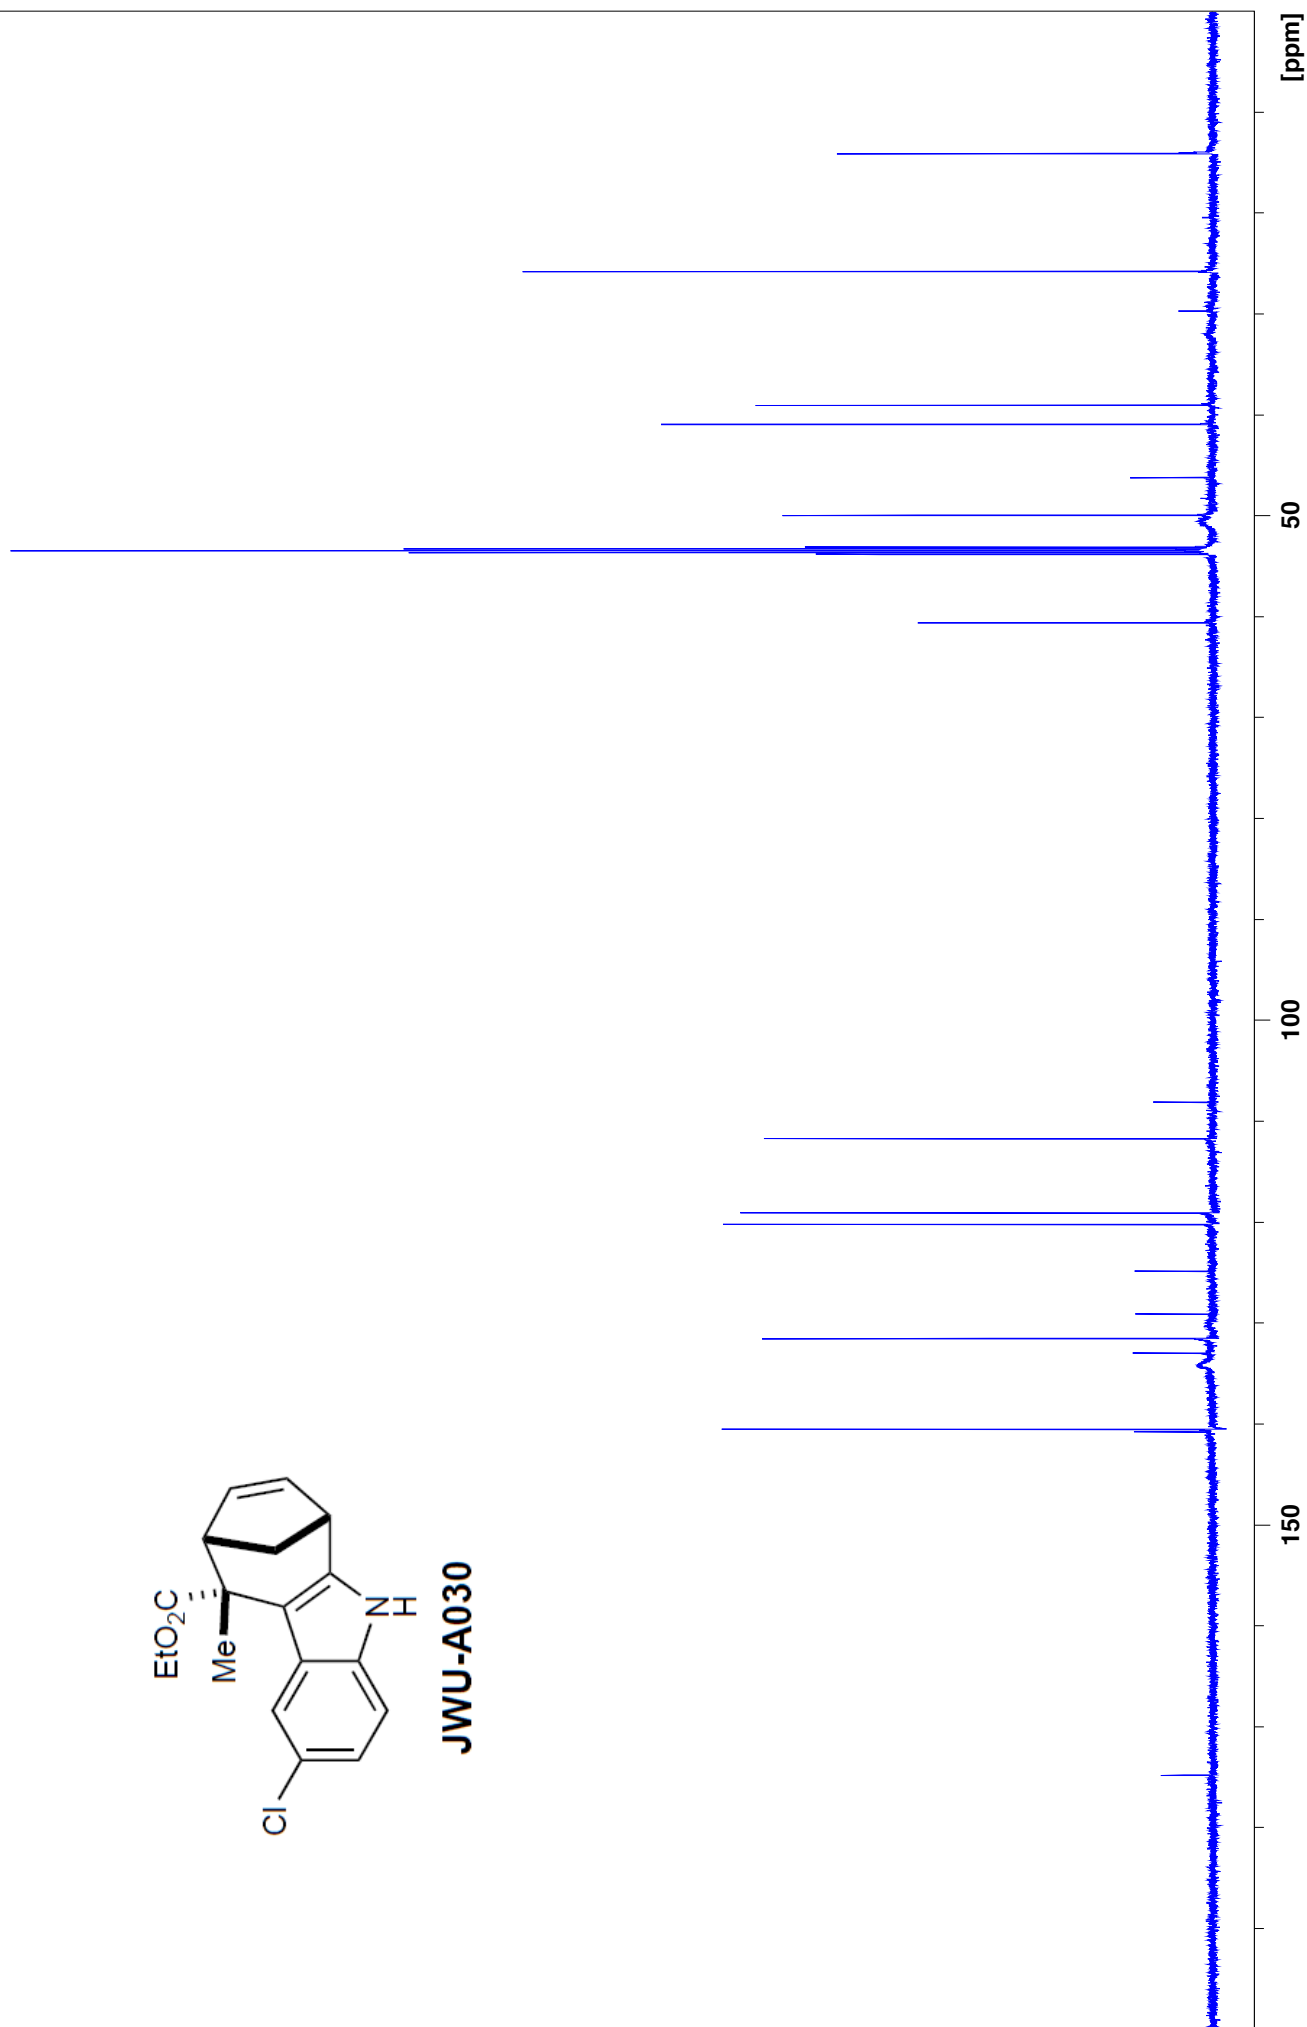

MT-N3-P102-IT26-5-5 13 1 N: \b600\wu\data\wu\_guest\hmr

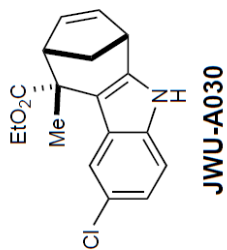

HMQC

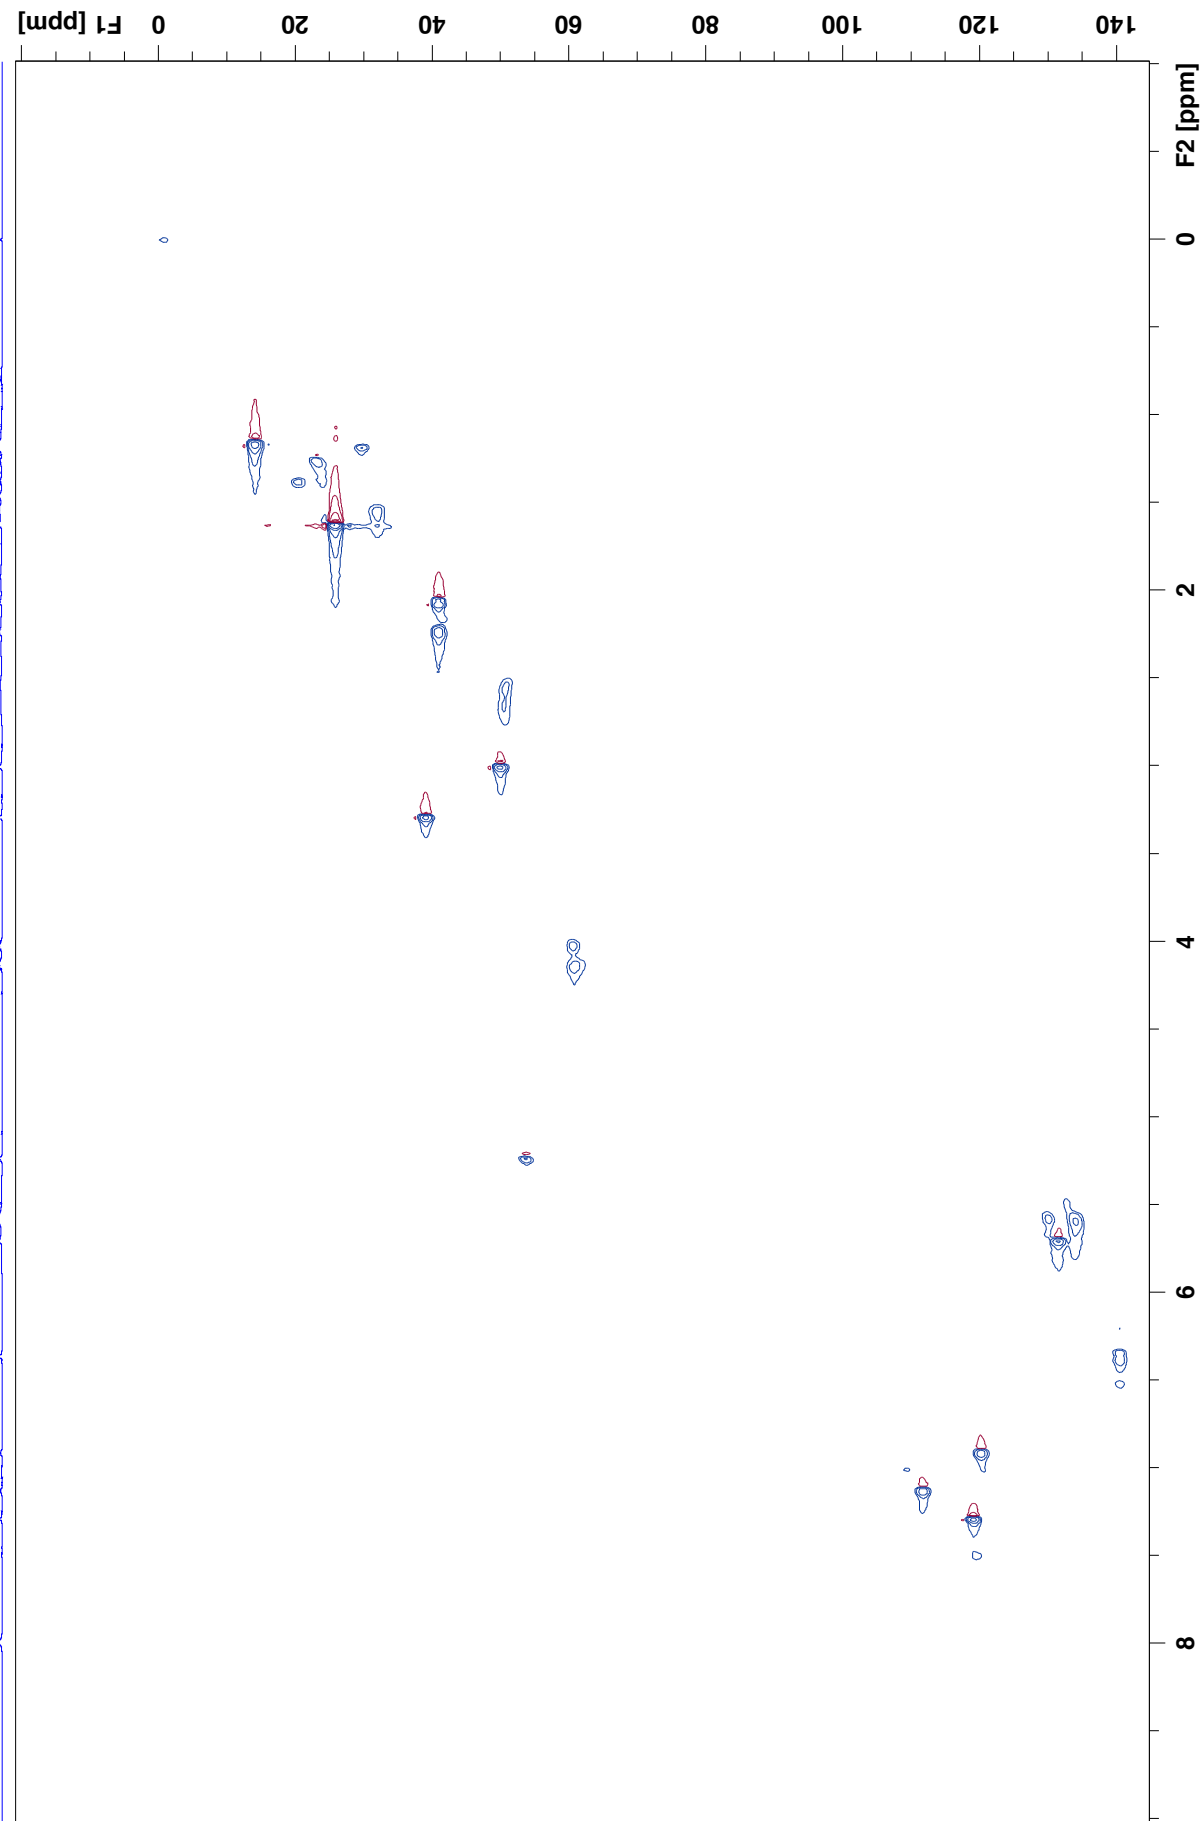

MT-N3-P102-TT26-5-5 14 1 N: \b600\wu\data\wu\_guest\hmr

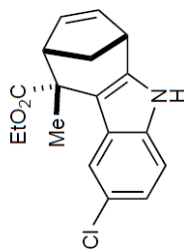

JWU-A030

HMBC

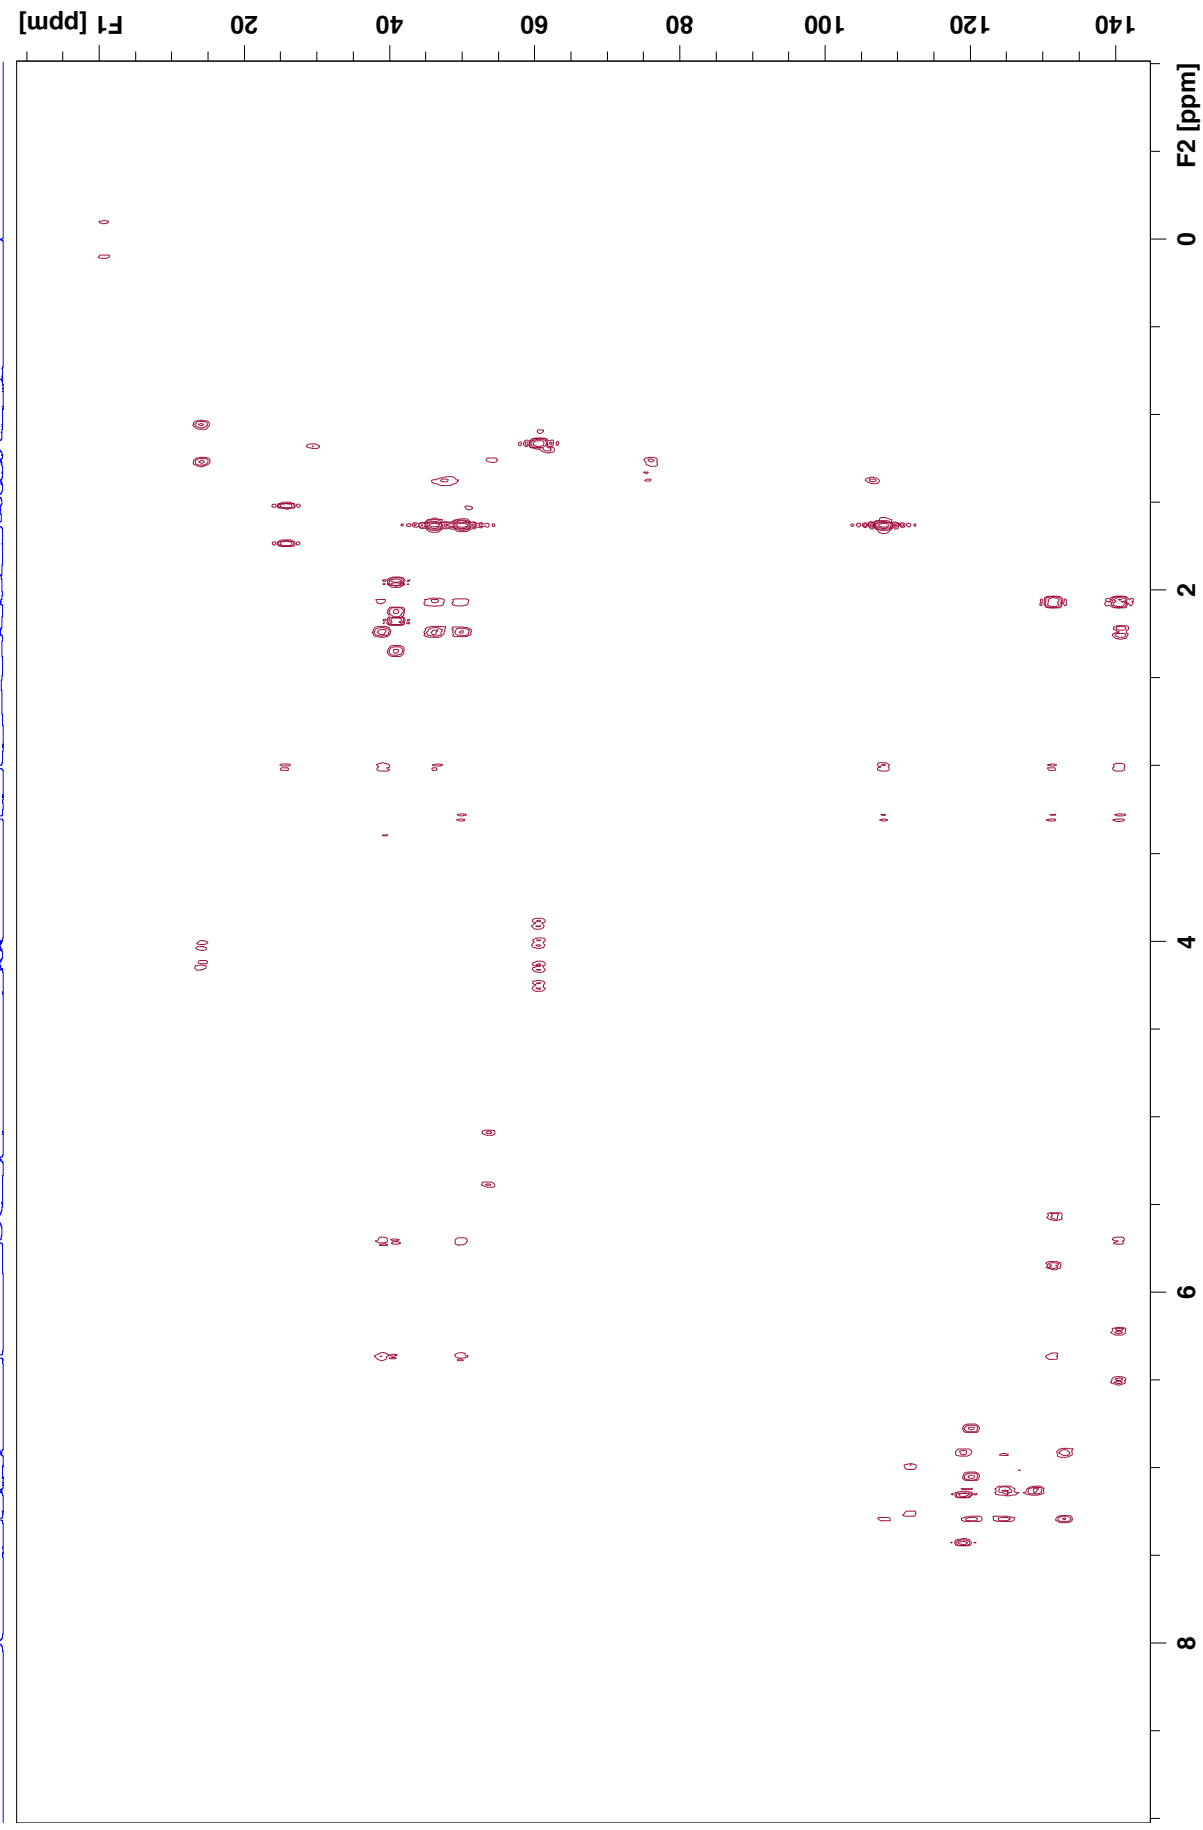

MT-N3-P102-TT26-5-5 16 1 N: \b600\wu\data\wu\_guest\nmr

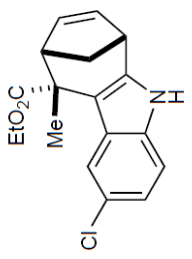

COSY

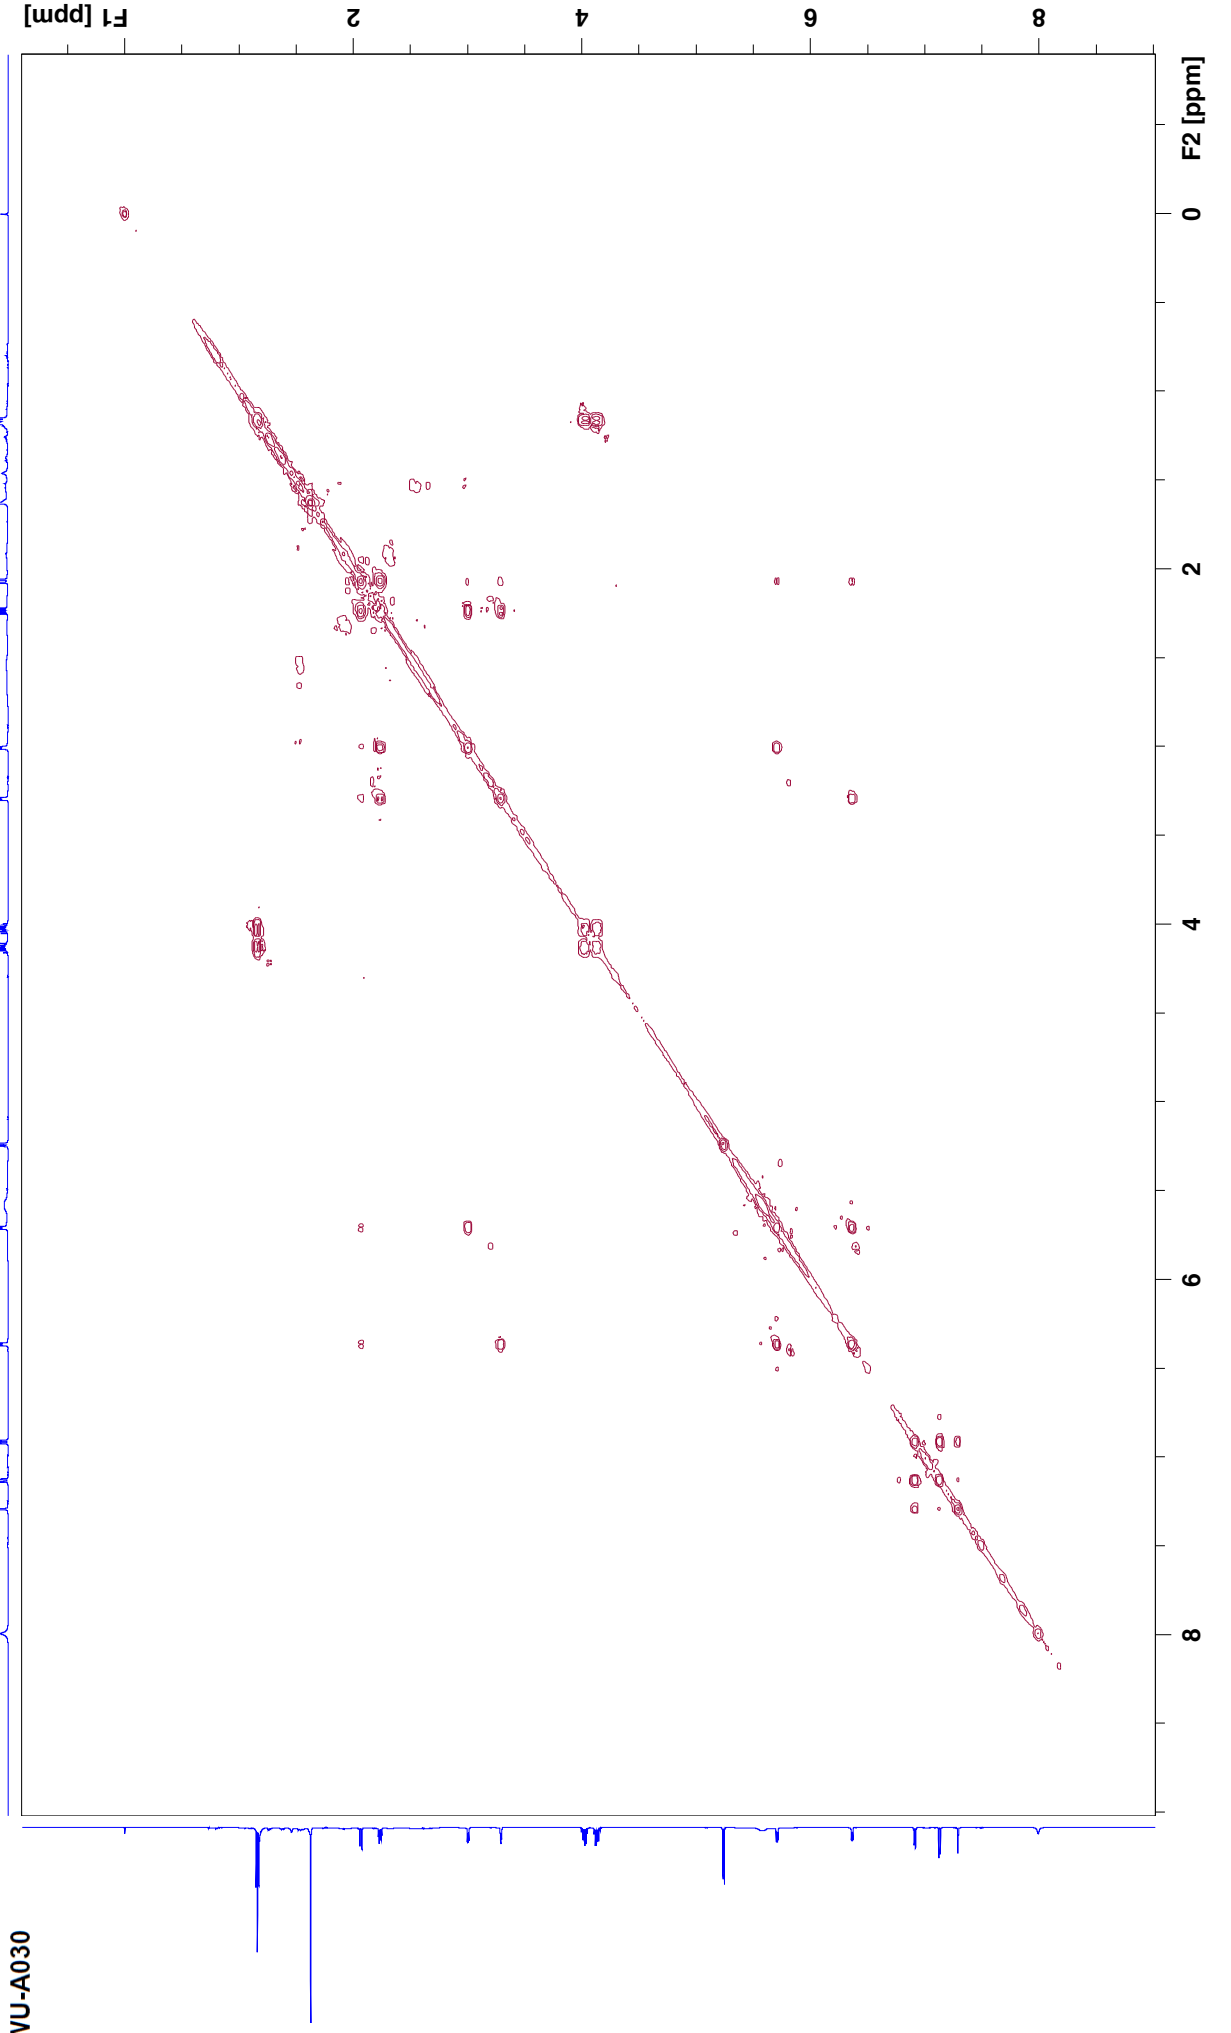

MT-N3-P102-TR26-5-5 15 1 N: \b600\wu\data\wu\_guest\hmr

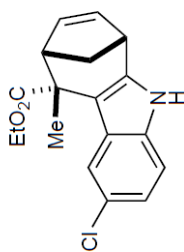

JWU-A030

# NOESY

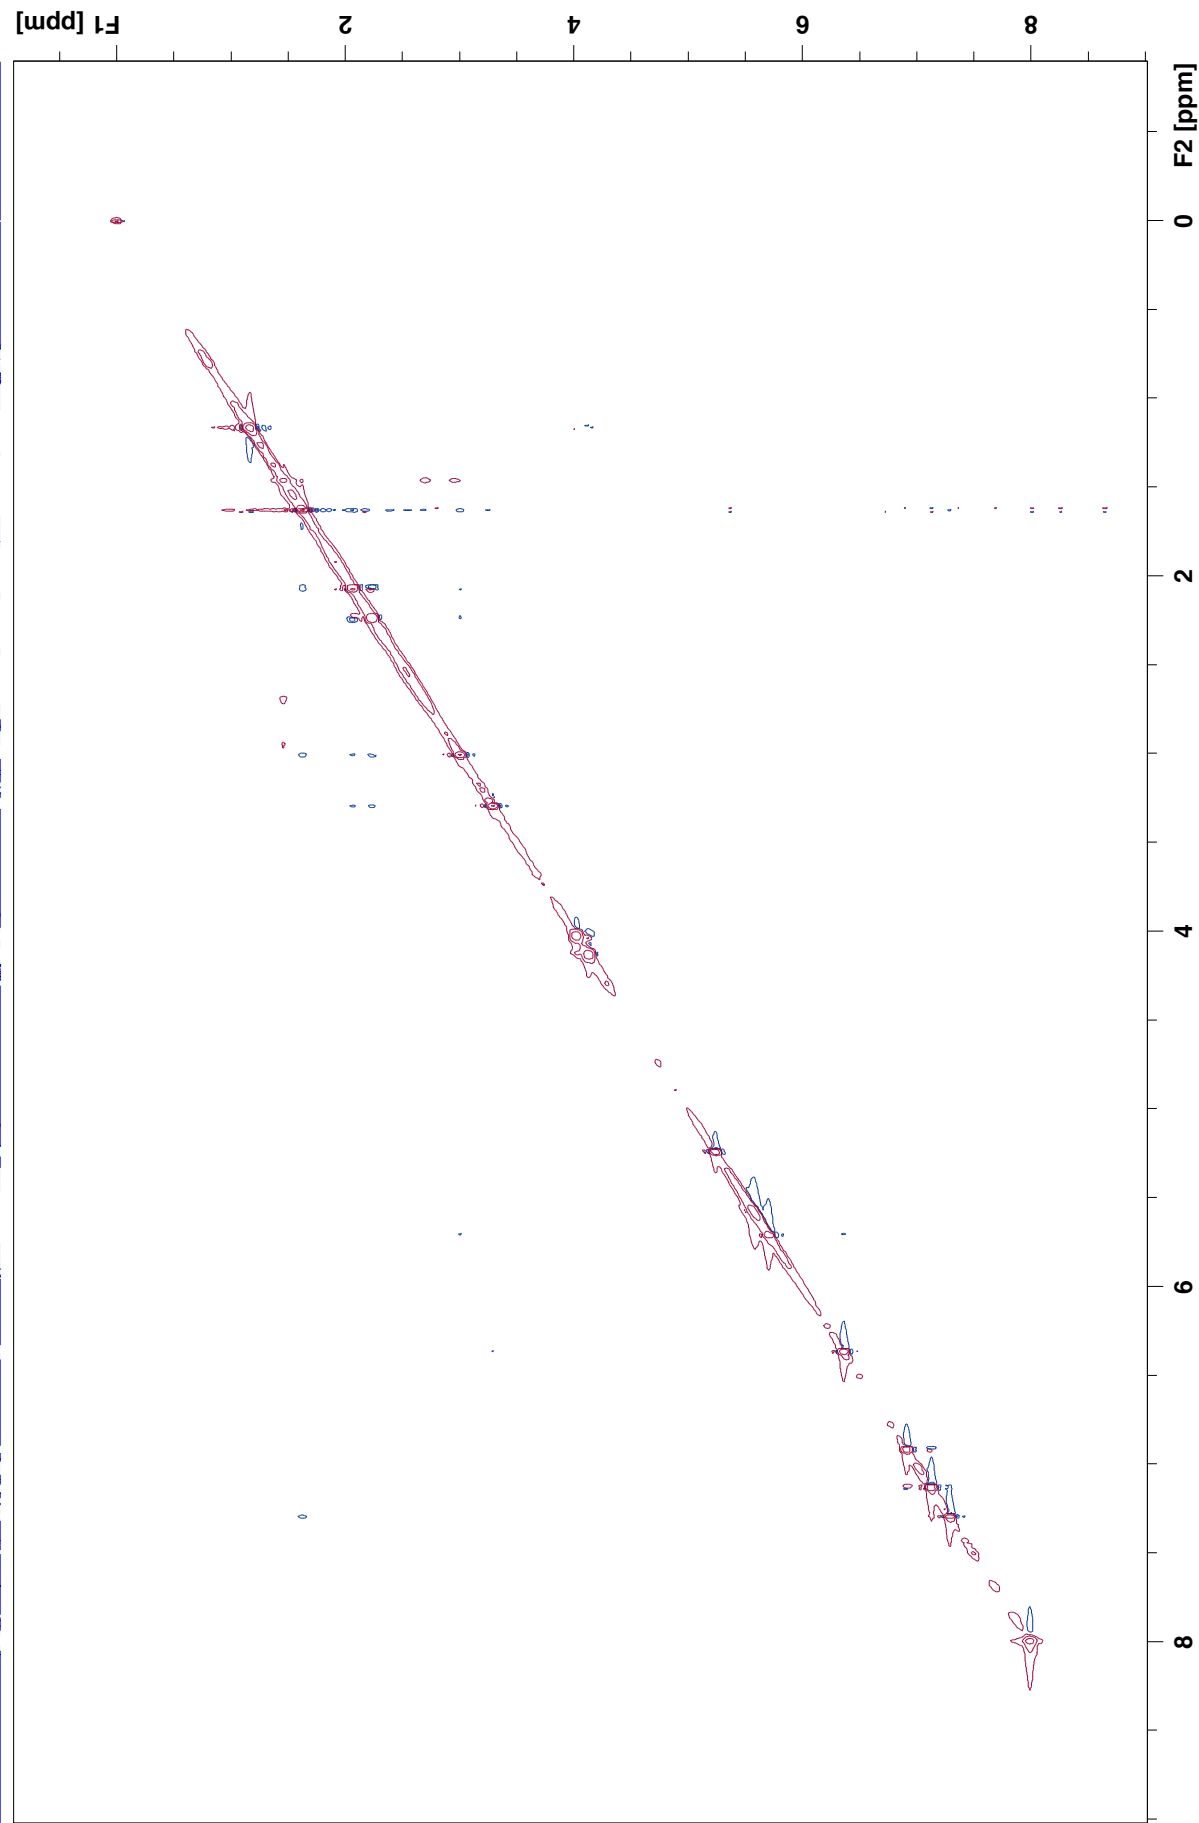

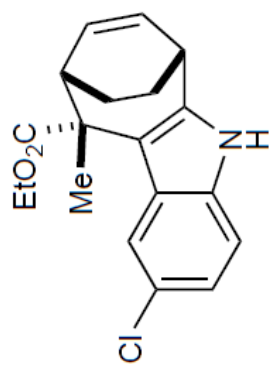

**JWU-A031**

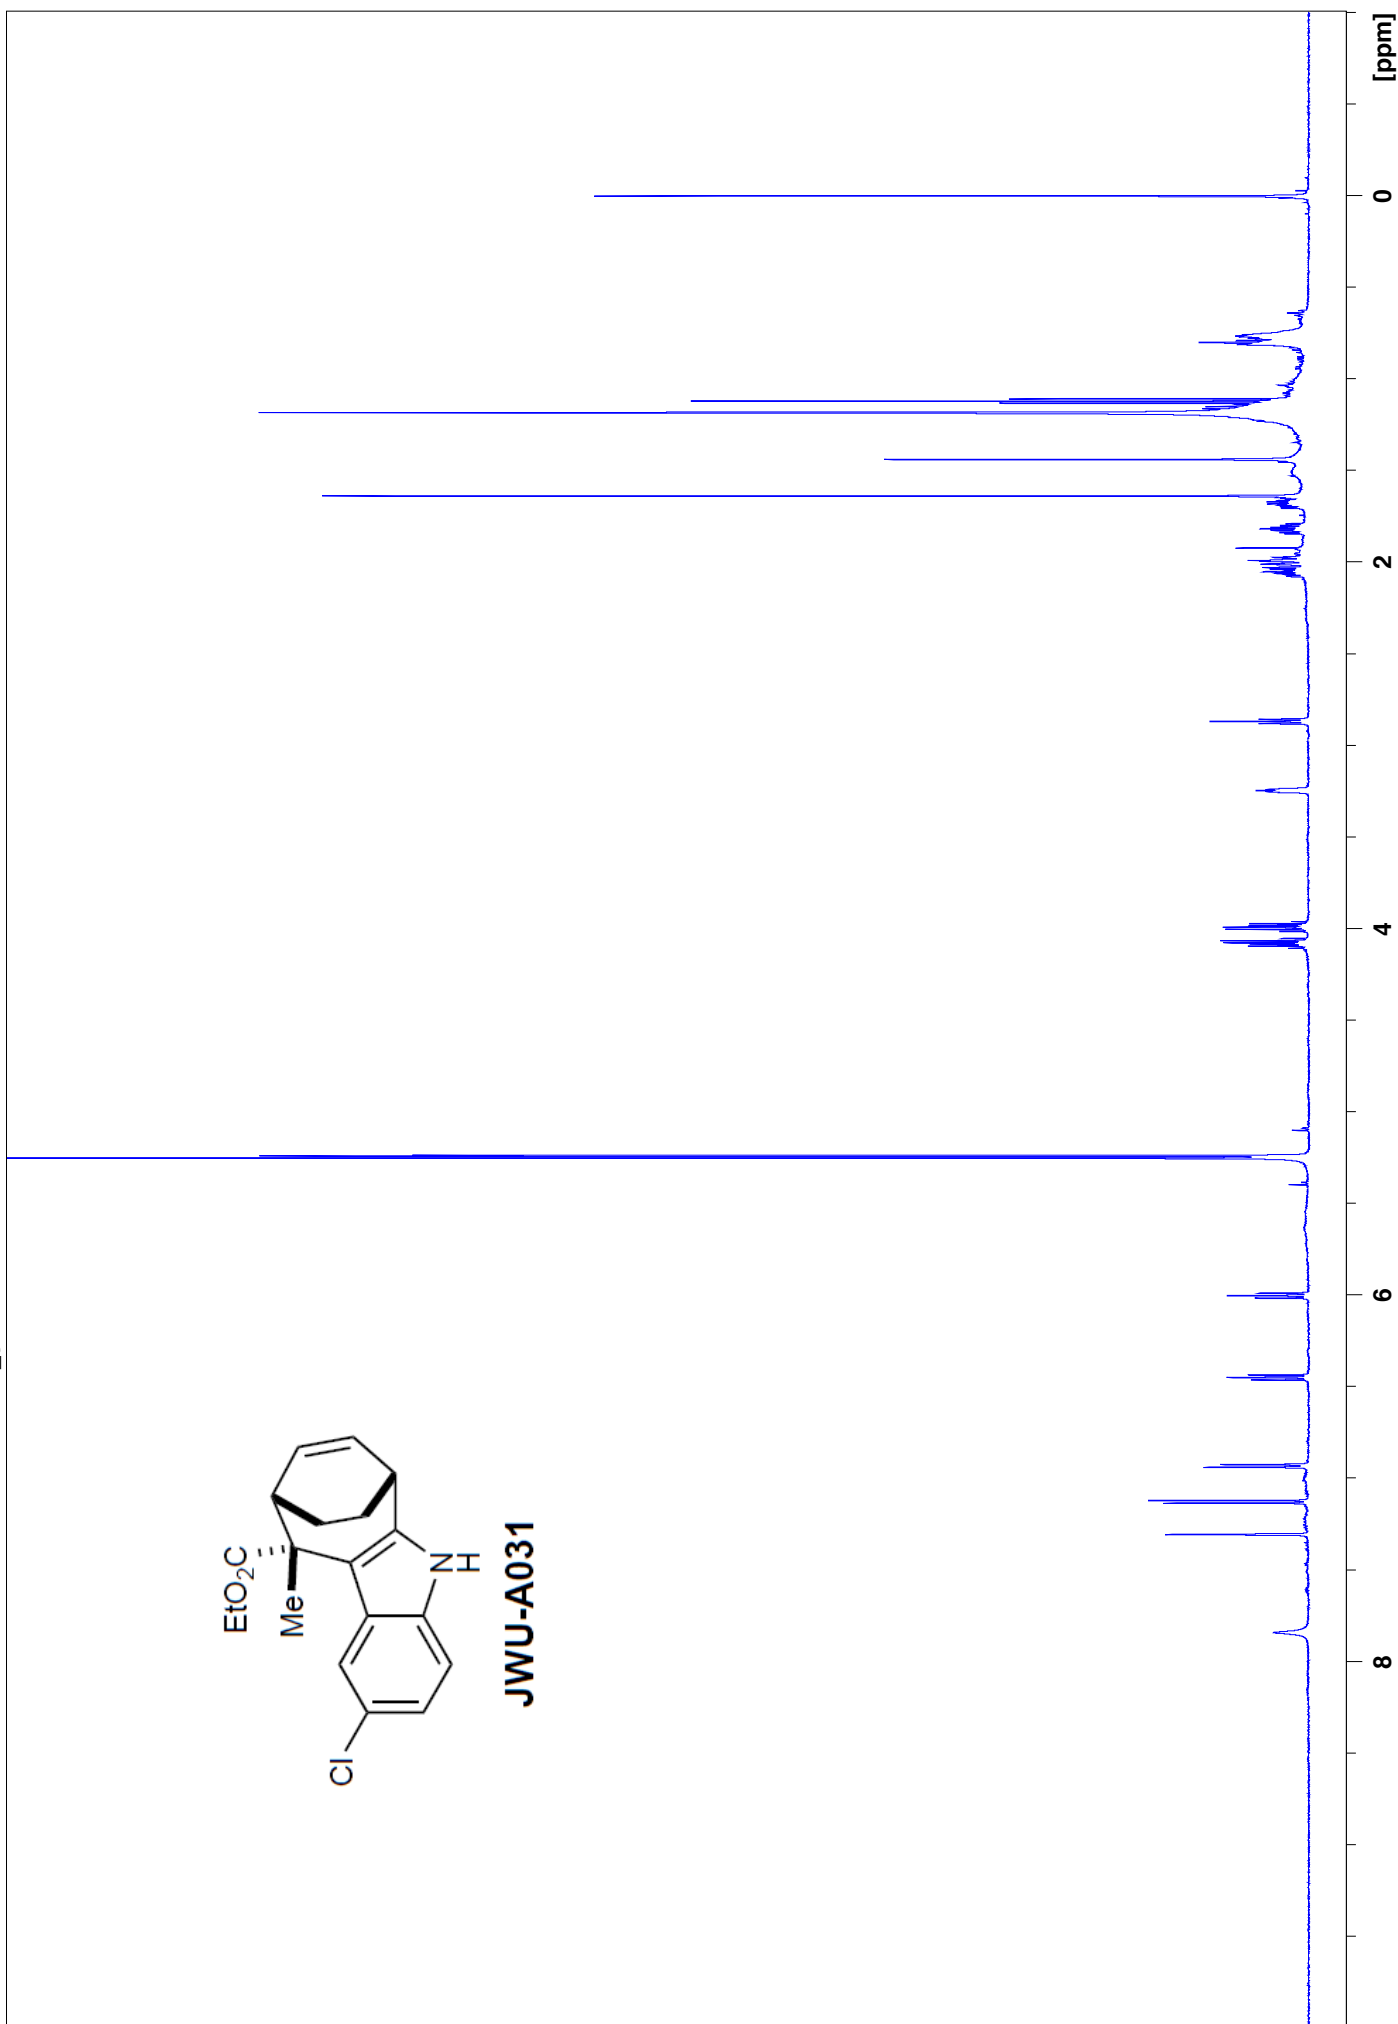



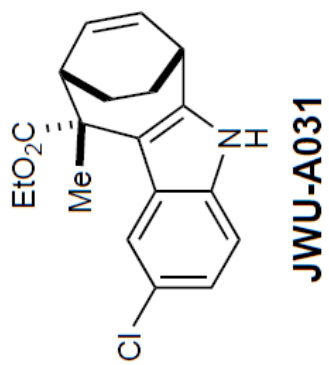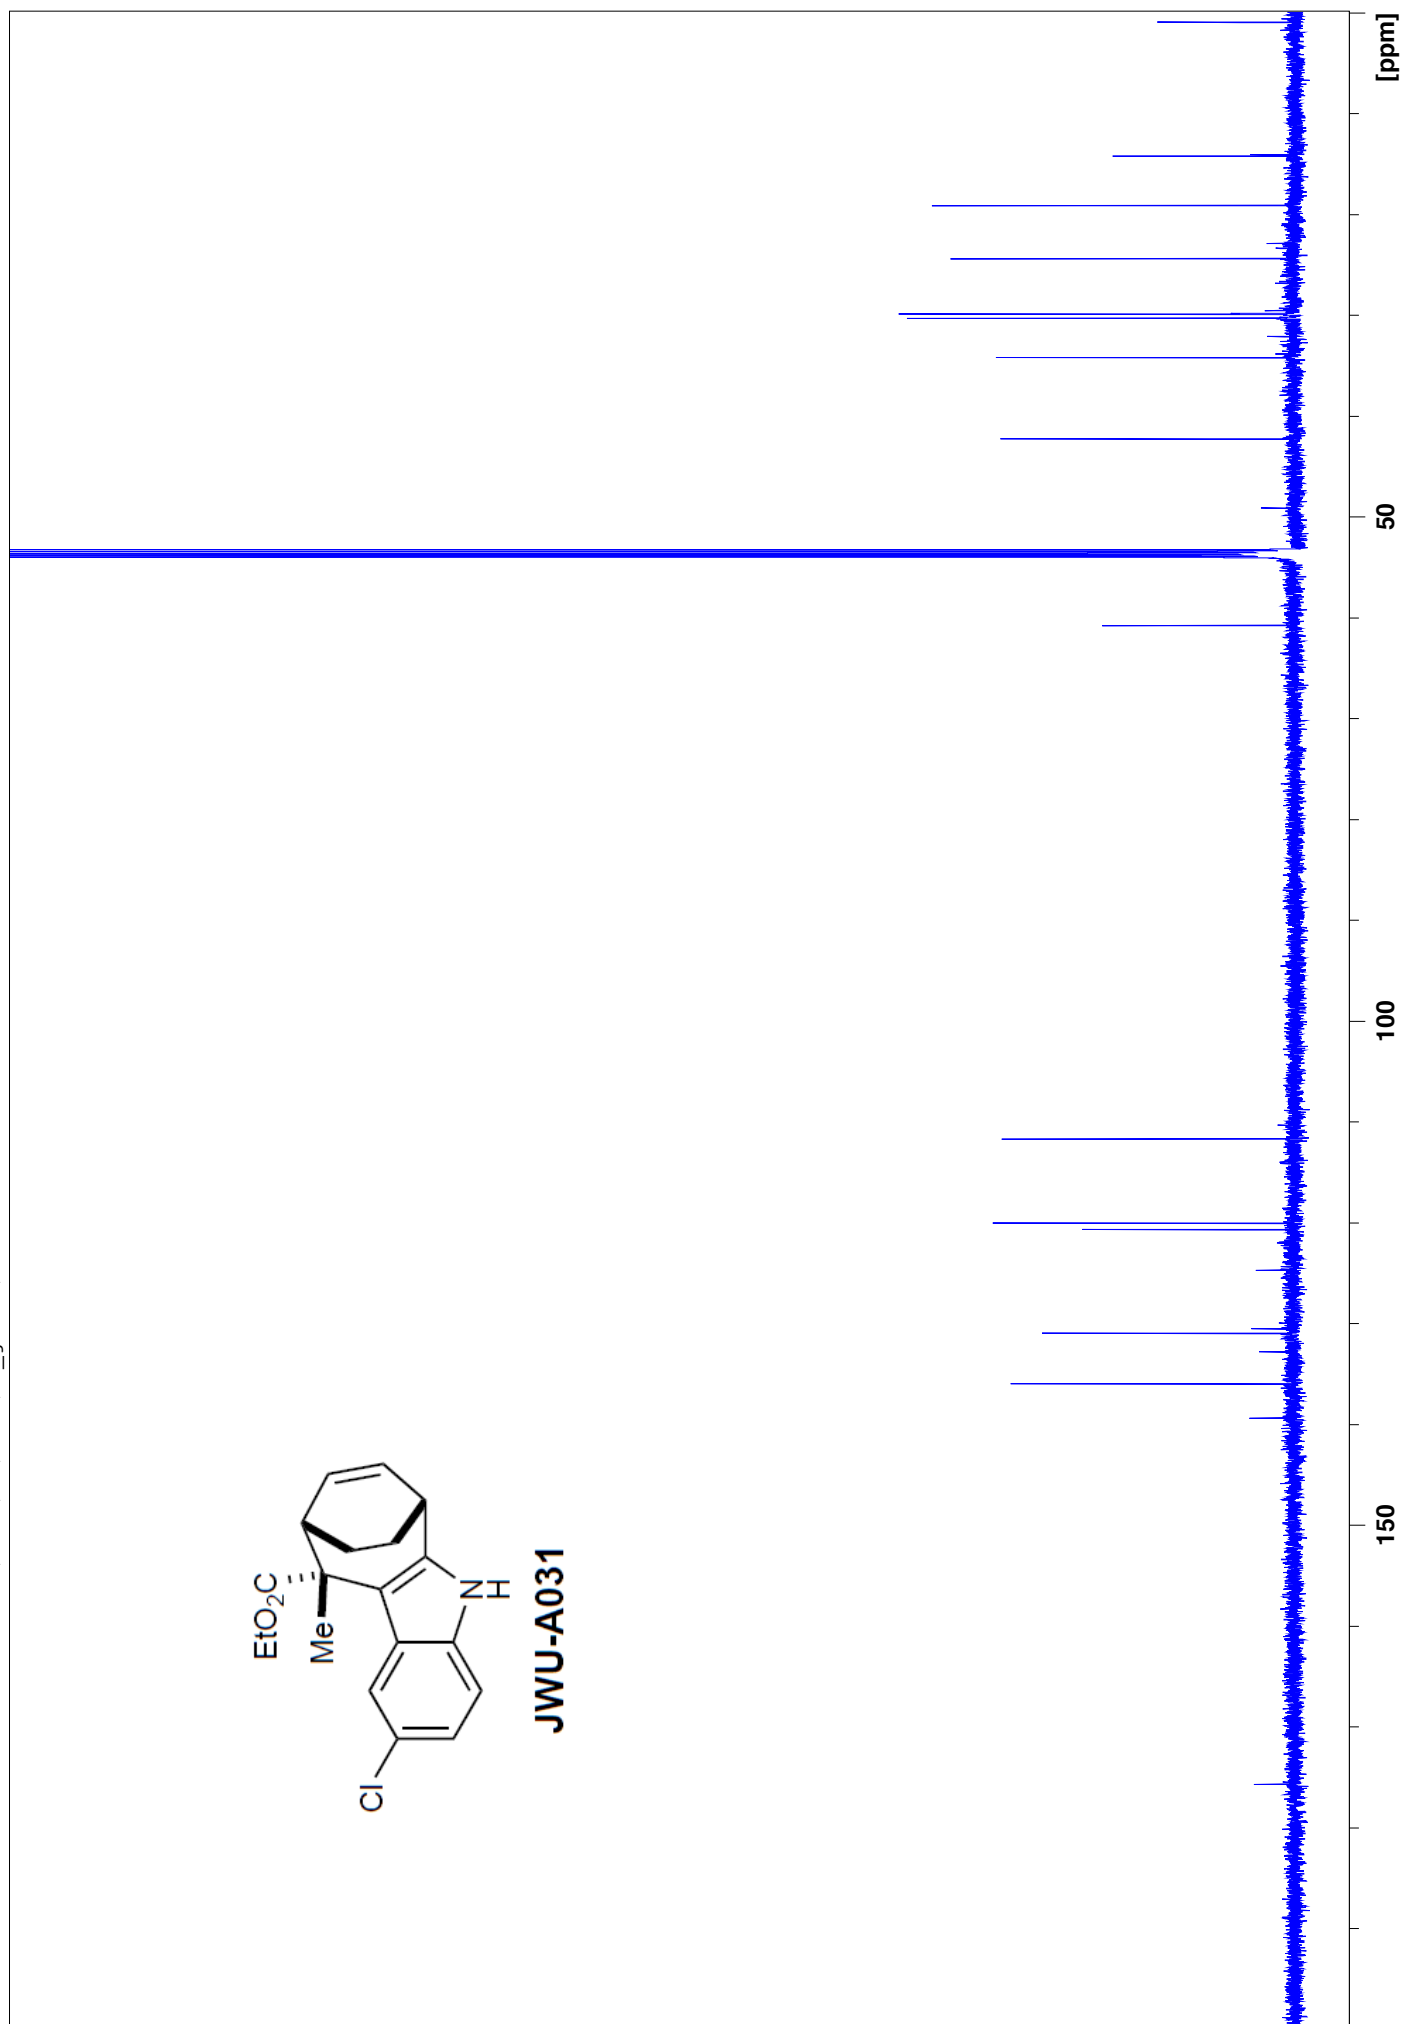

MT-N3-P154-TT14-15-ETOAc-2 12 1 N:\b600\wu\data\wu\_guest\nmr

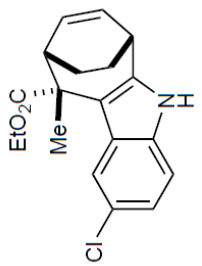

JWU-A031

HMQC

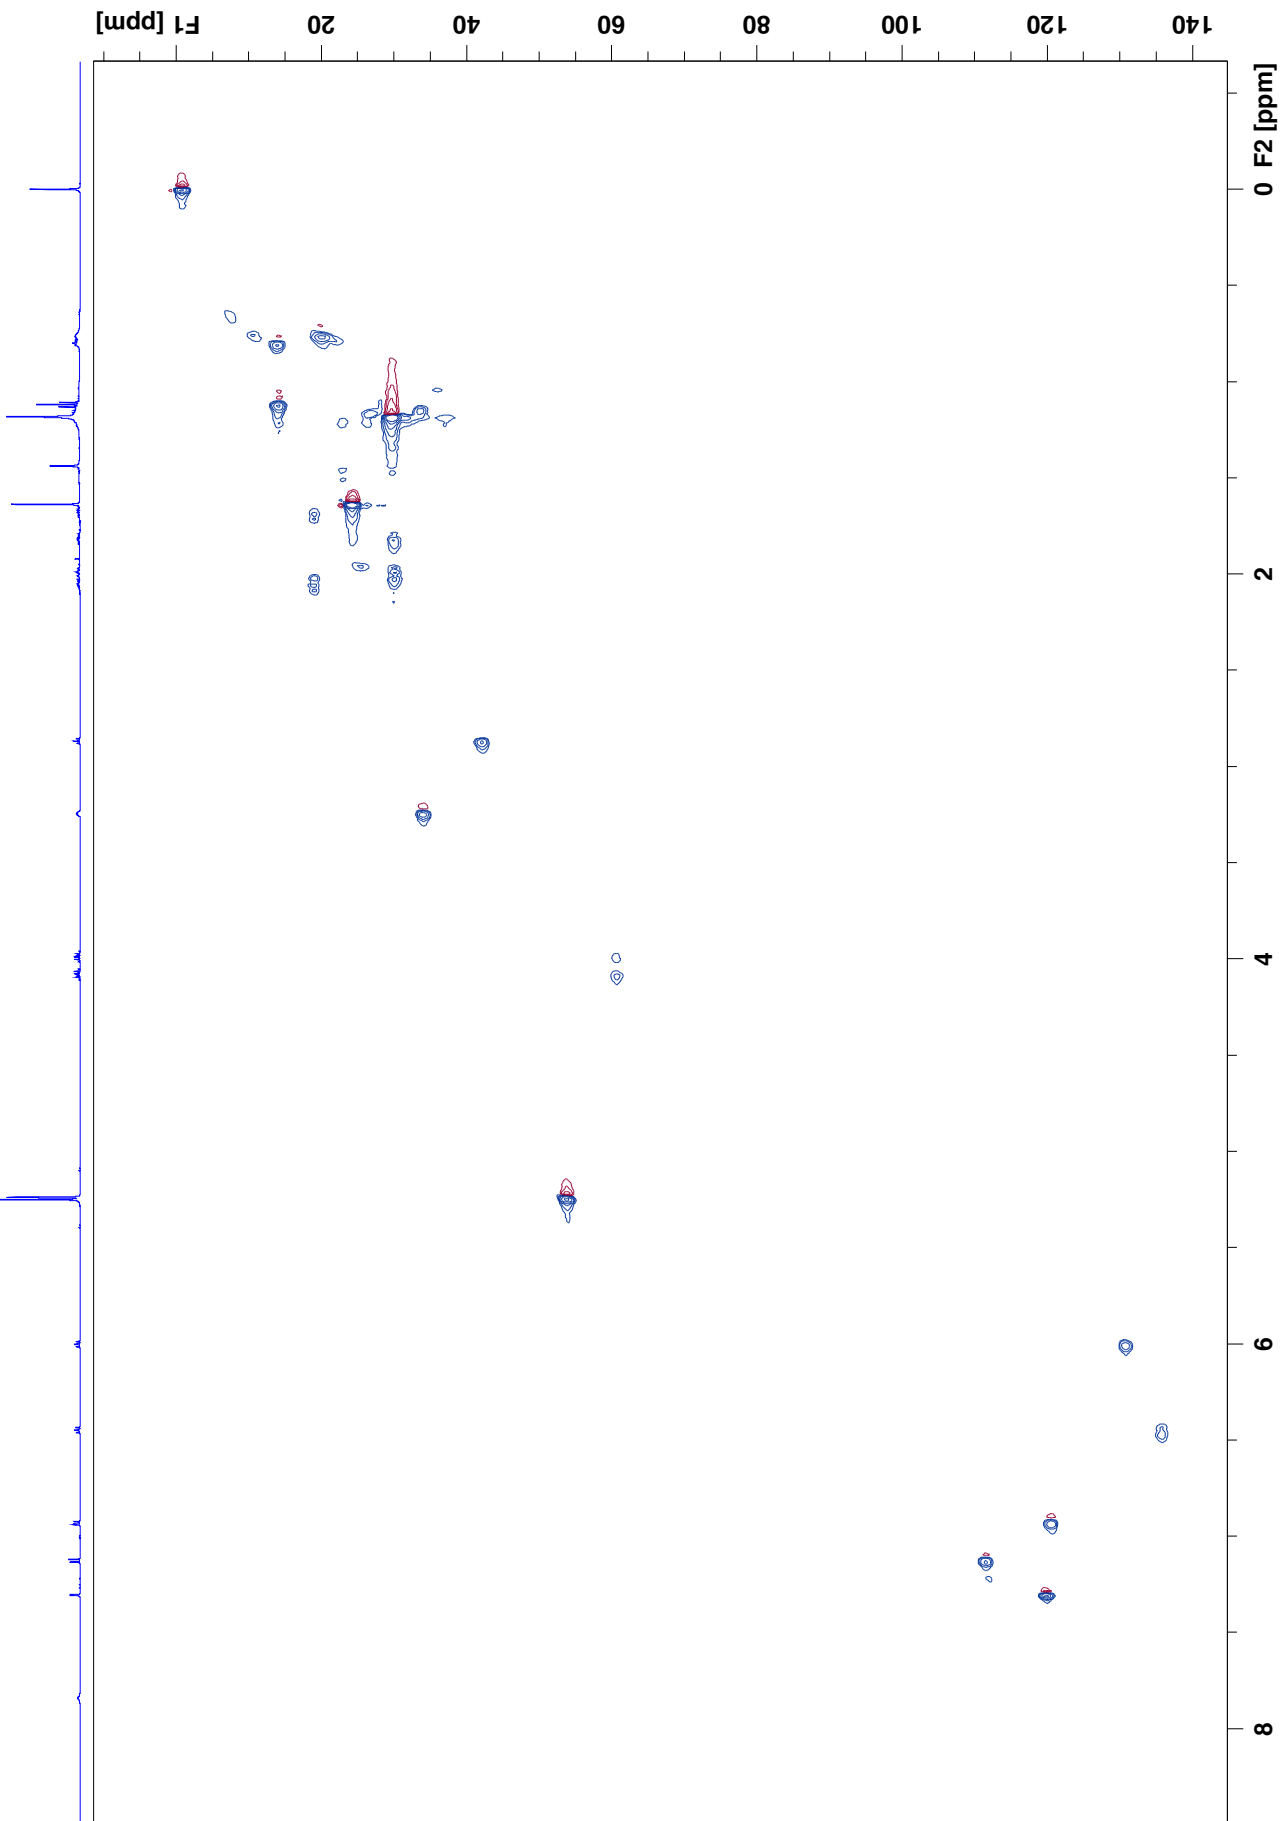

S26

MT-N3-P154-TT14-15-ETOAc-2 I1 1 N:\b600\wu\data\wu\_guest\nmr

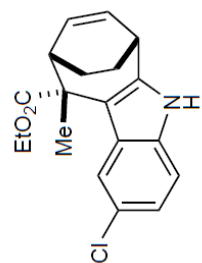

JWU-A031

HMBC

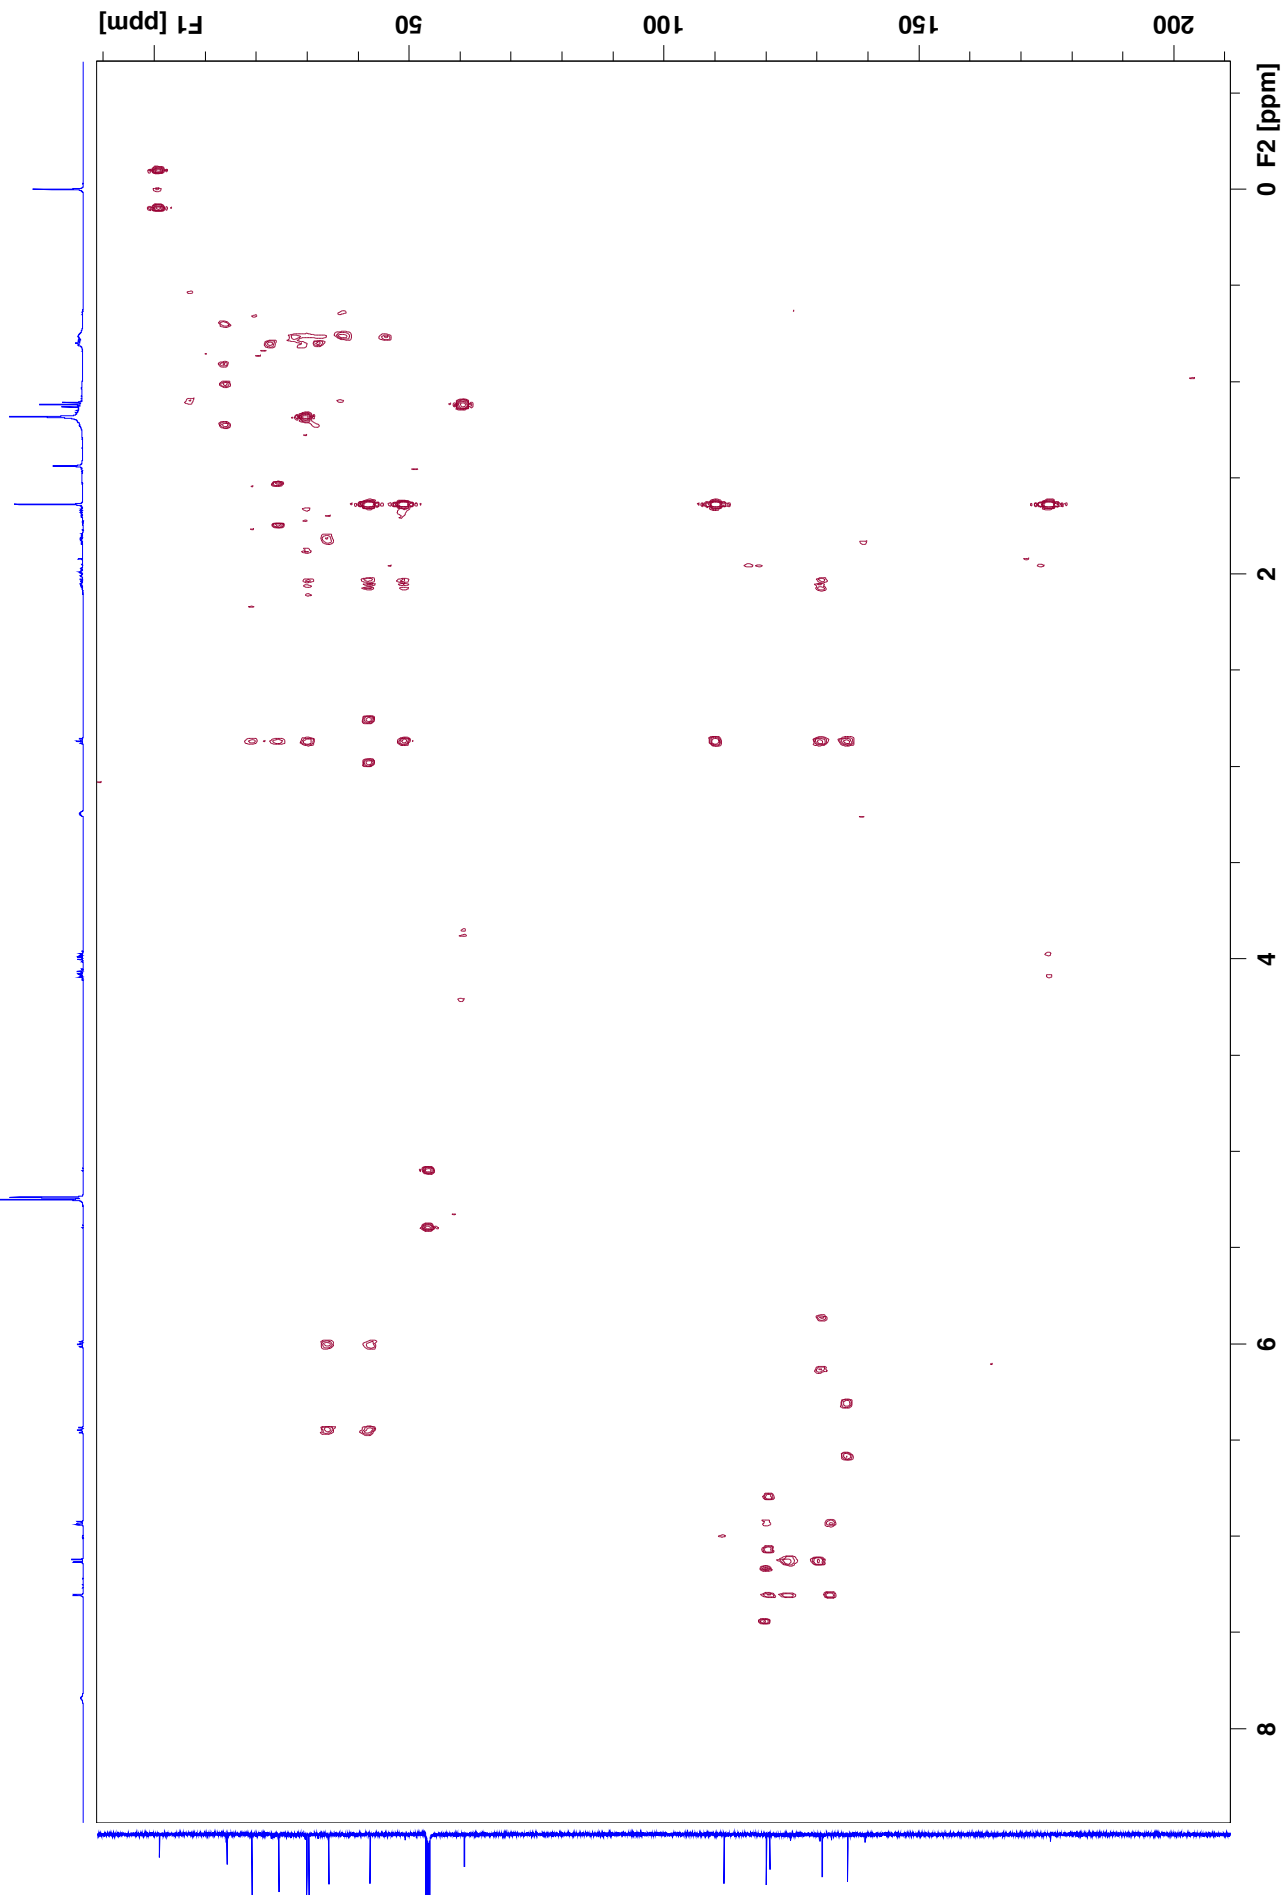

MT-N3-P154-TT14-15-ETOAc-3 I1 1 N:\b600\wu\data\wu\_guest\nmr

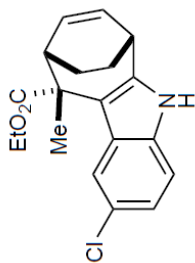

JWU-A031

COSY

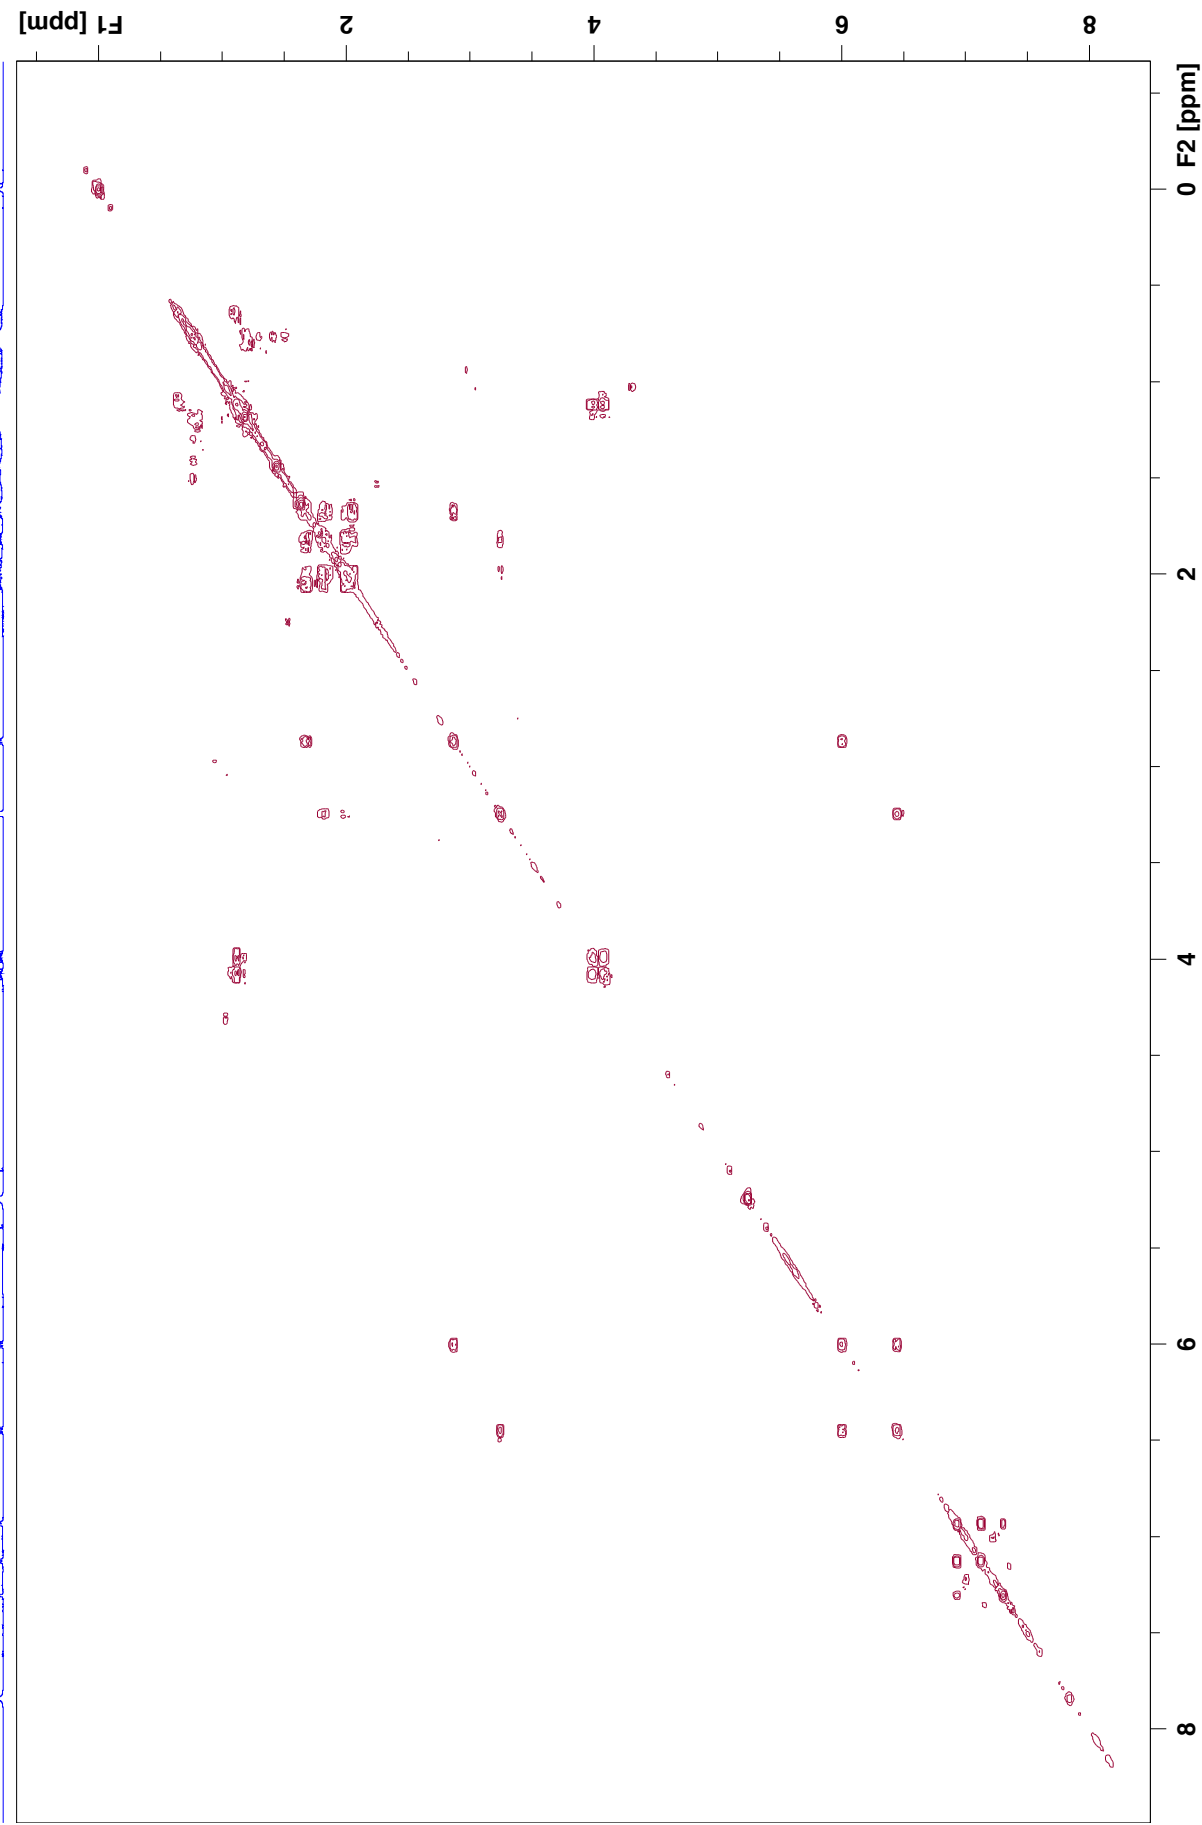

MT-N3-P154-TT14-15-ETOAc-2 13 1 N:\b600\wu\data\wu\_guest\nmr

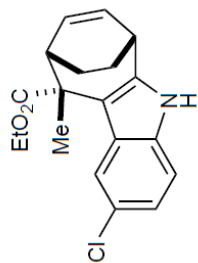

JWU-A031

# NOESY

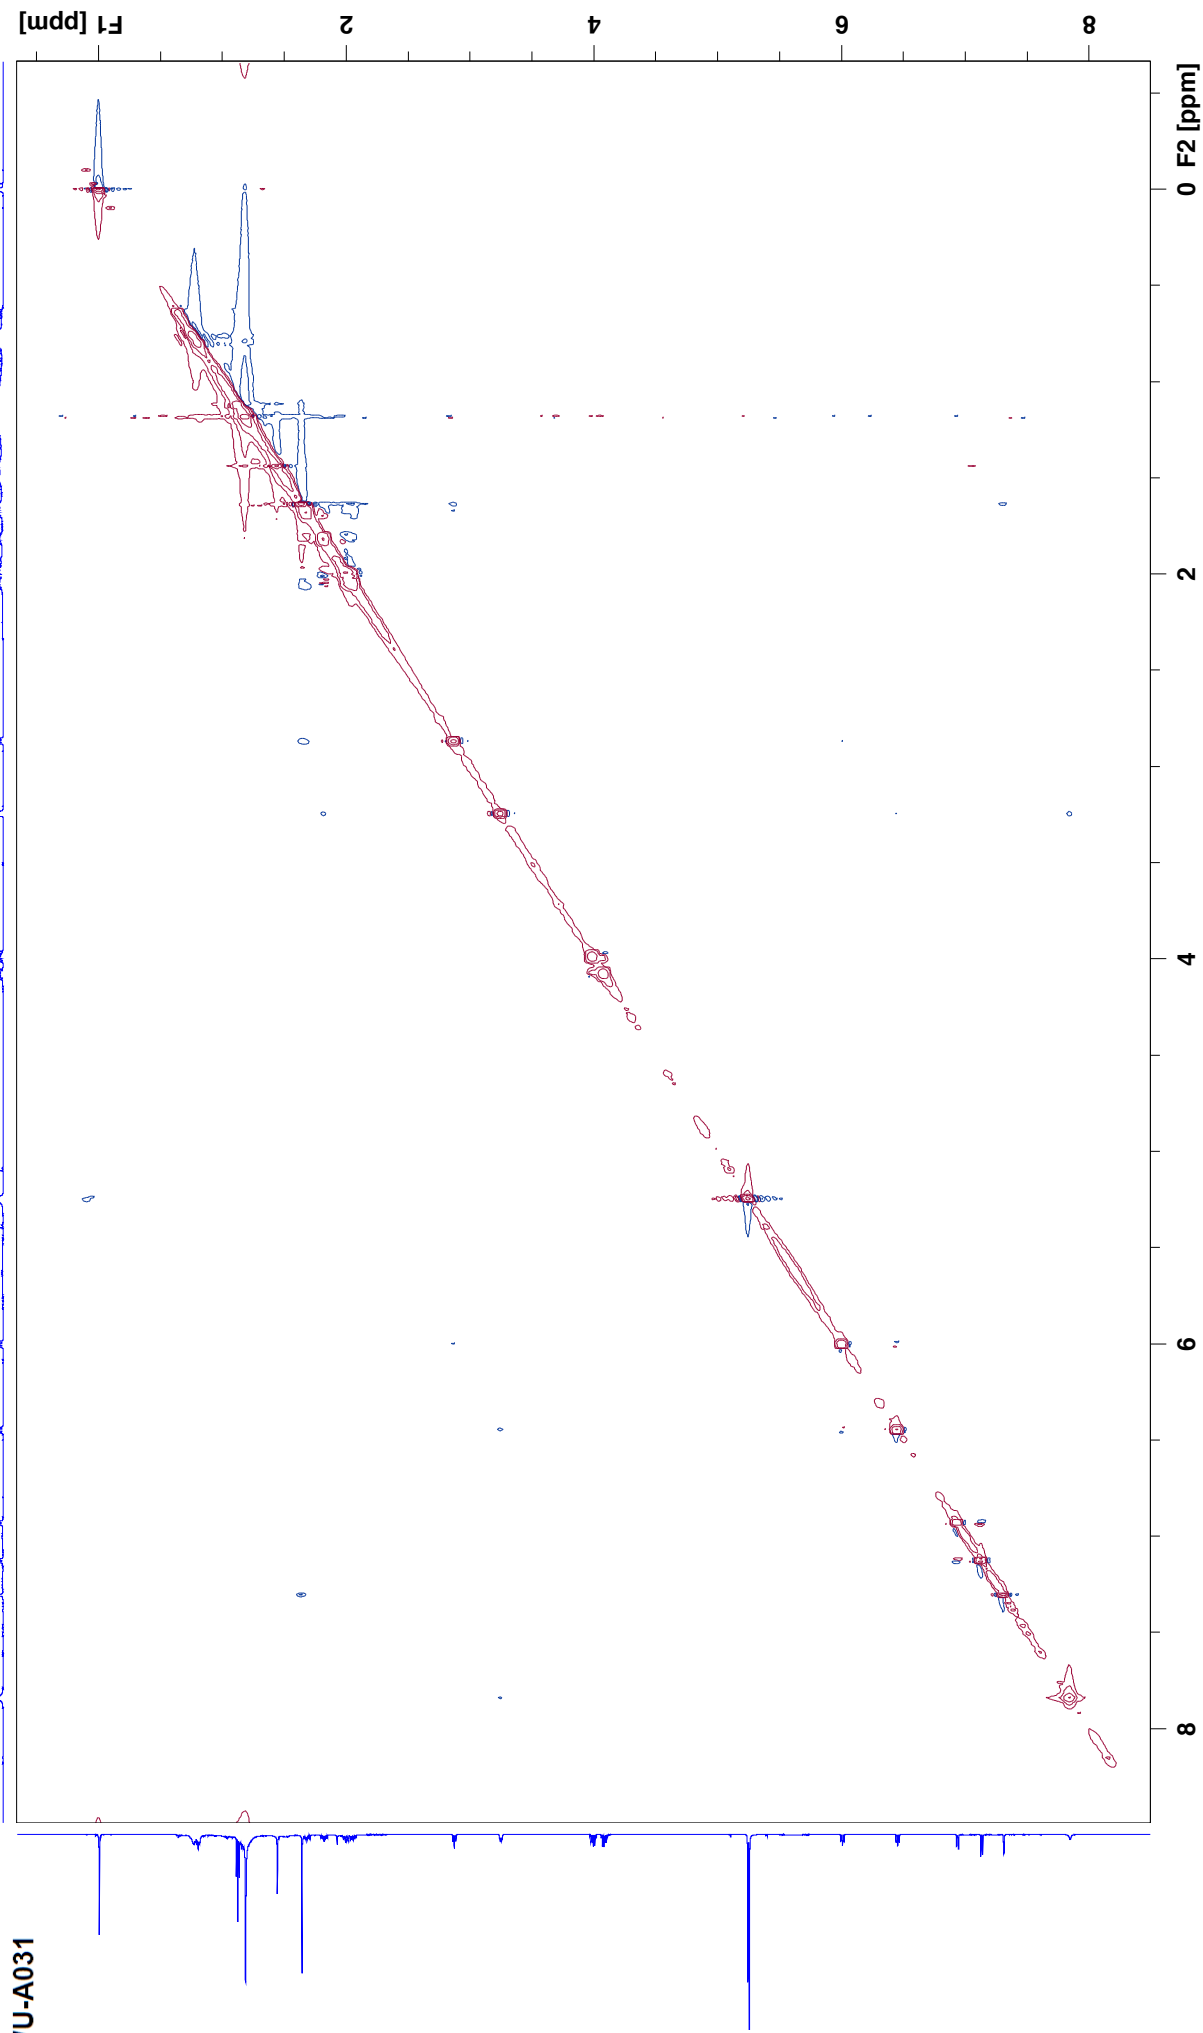

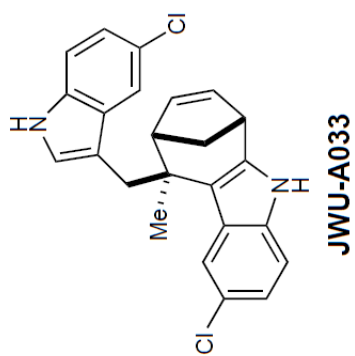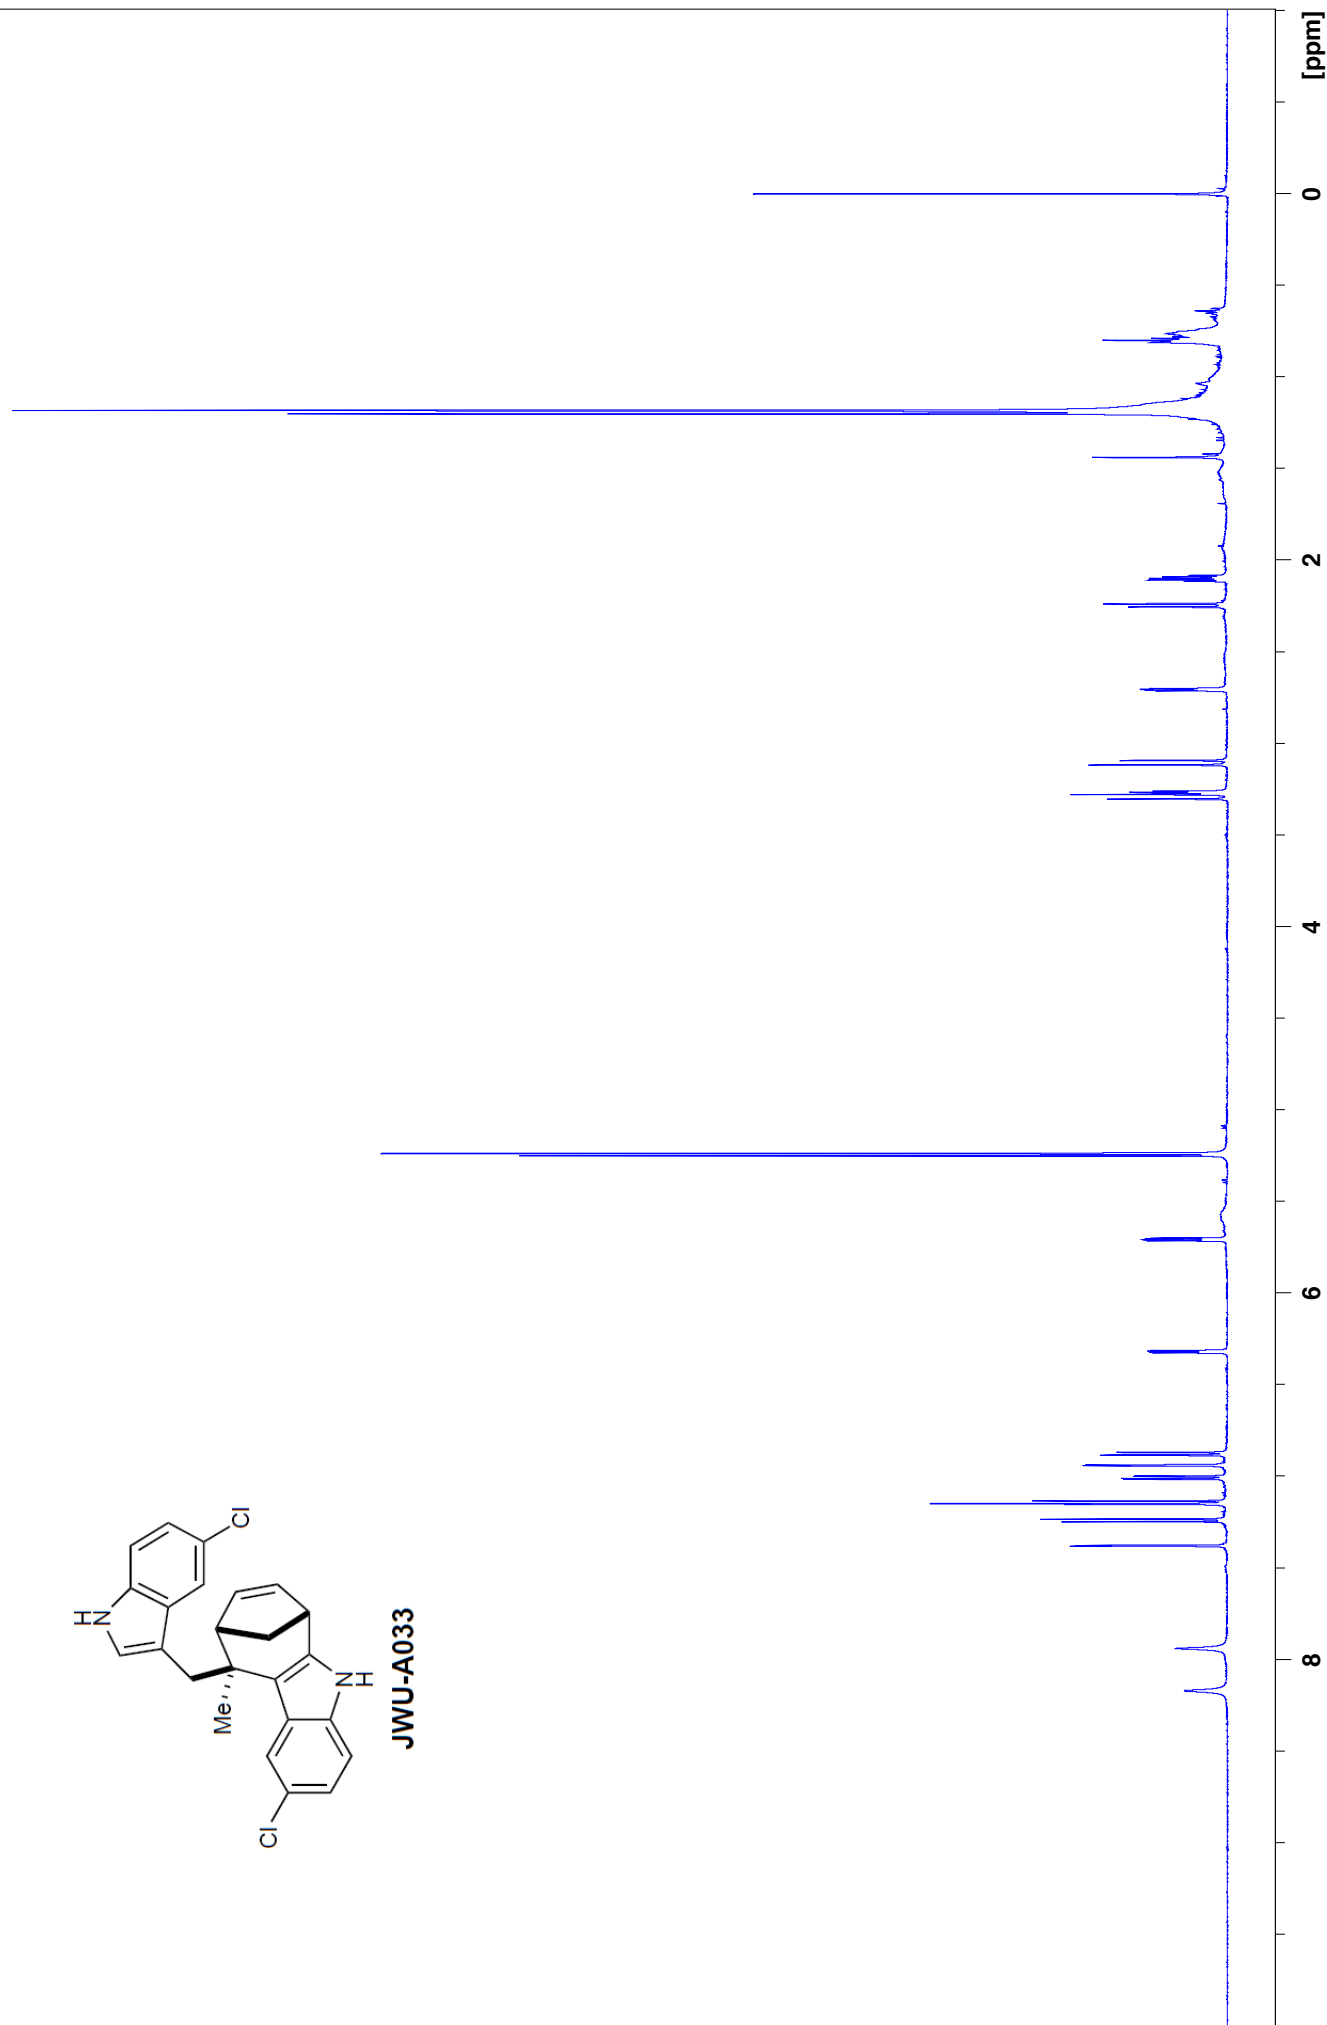

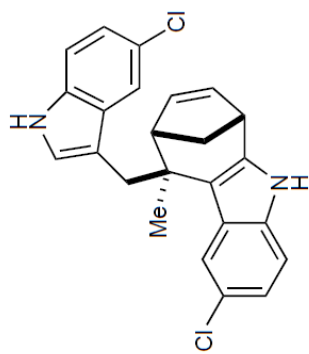

JWU-A033

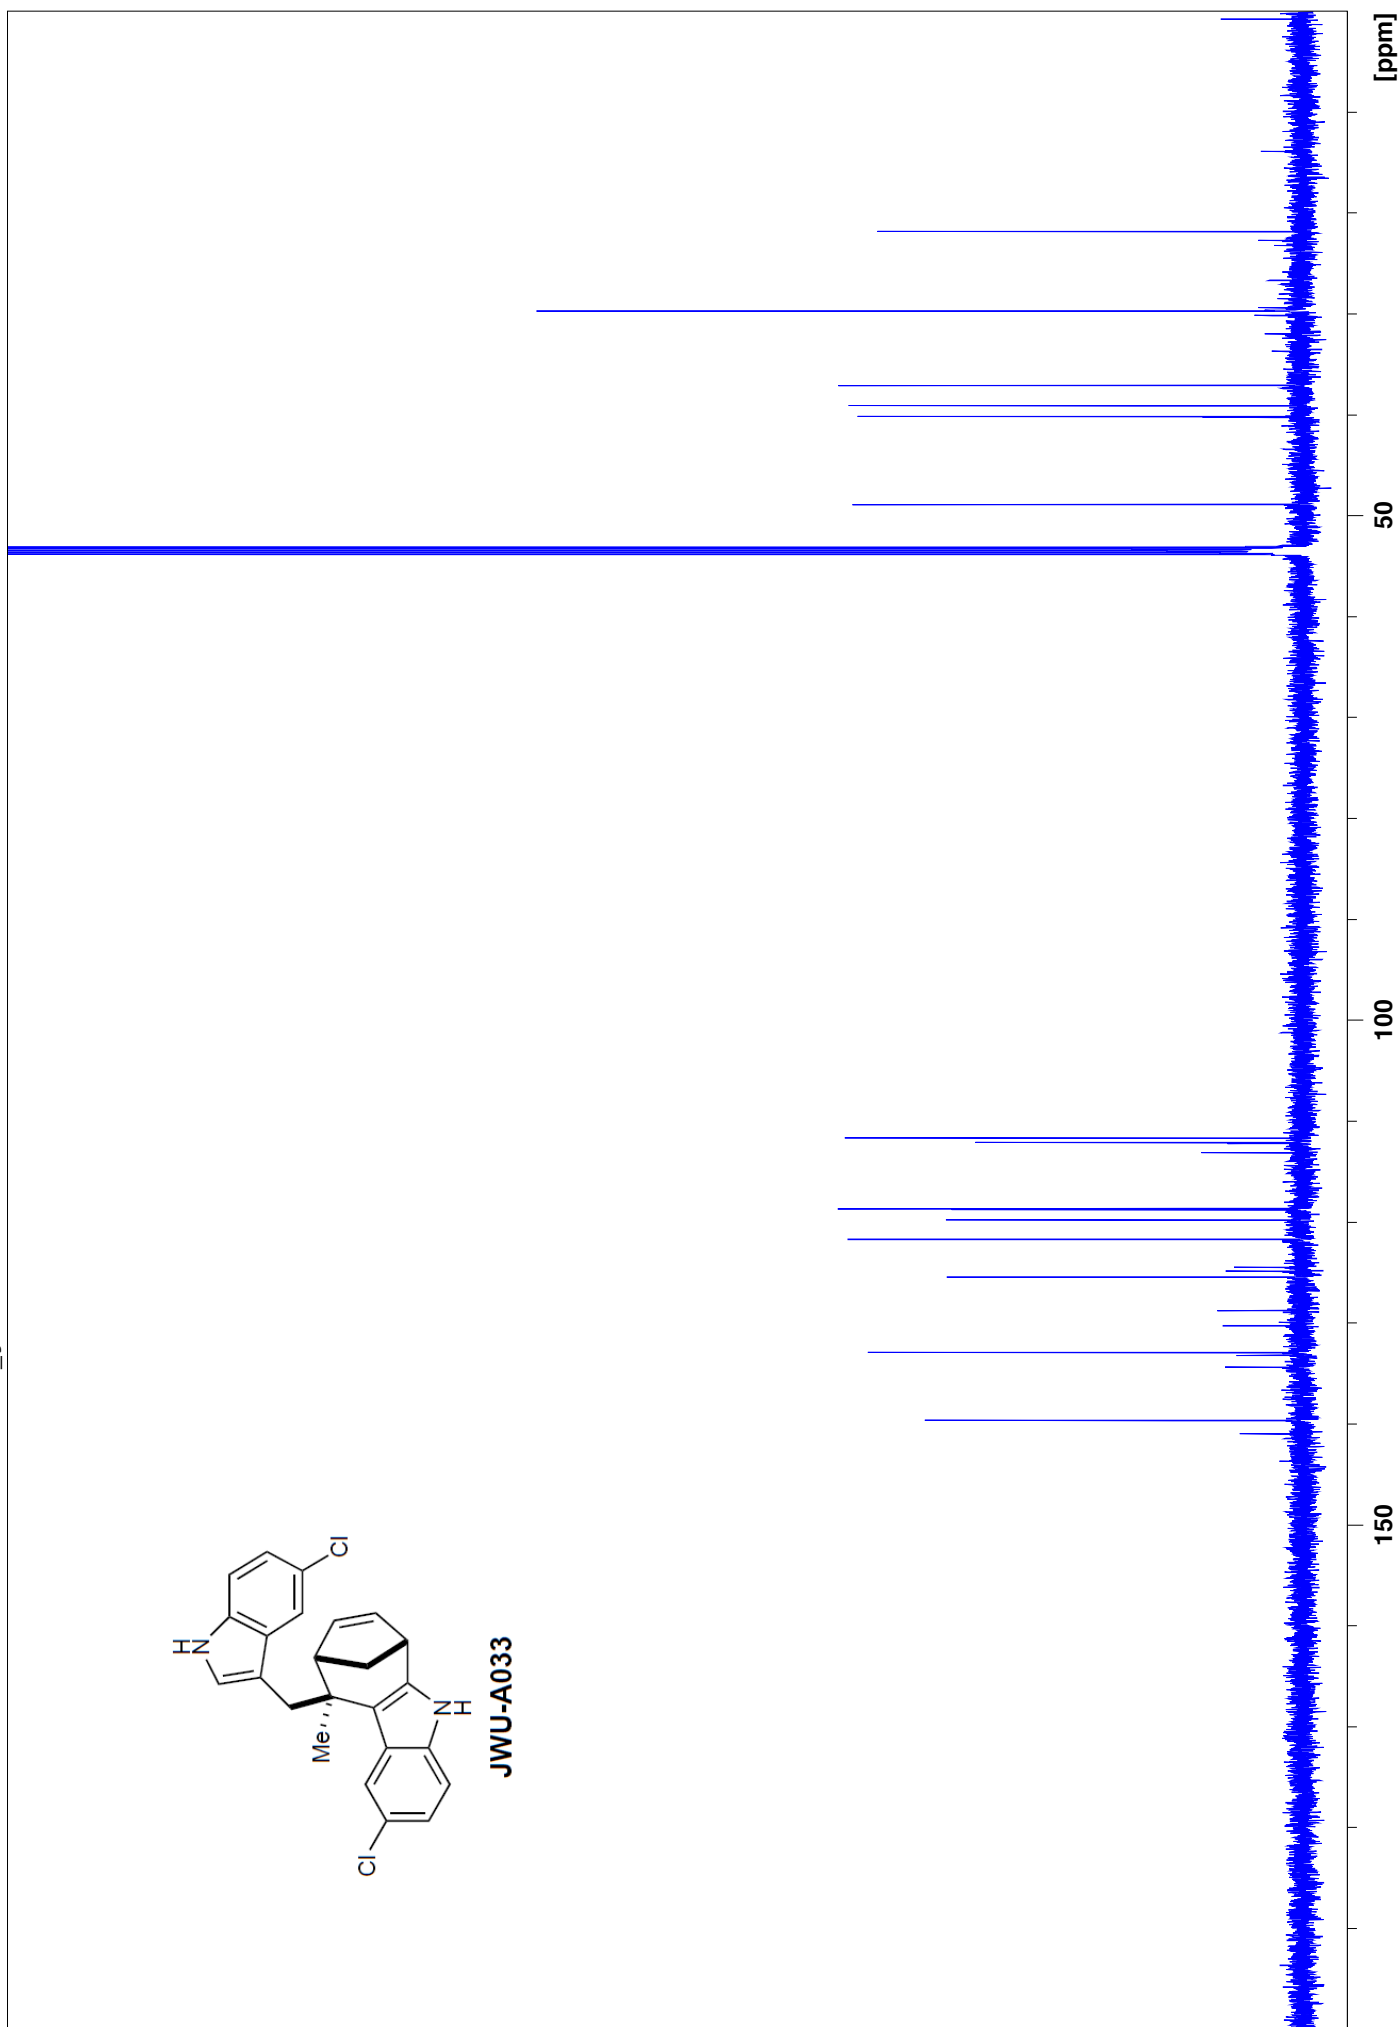

MT-N3-P128-TT22-24-5-6-C 14 1 N:\b600\wu\data\wu\_guest\hmr

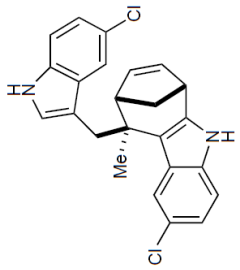

JWU-A033

S32

HMQC

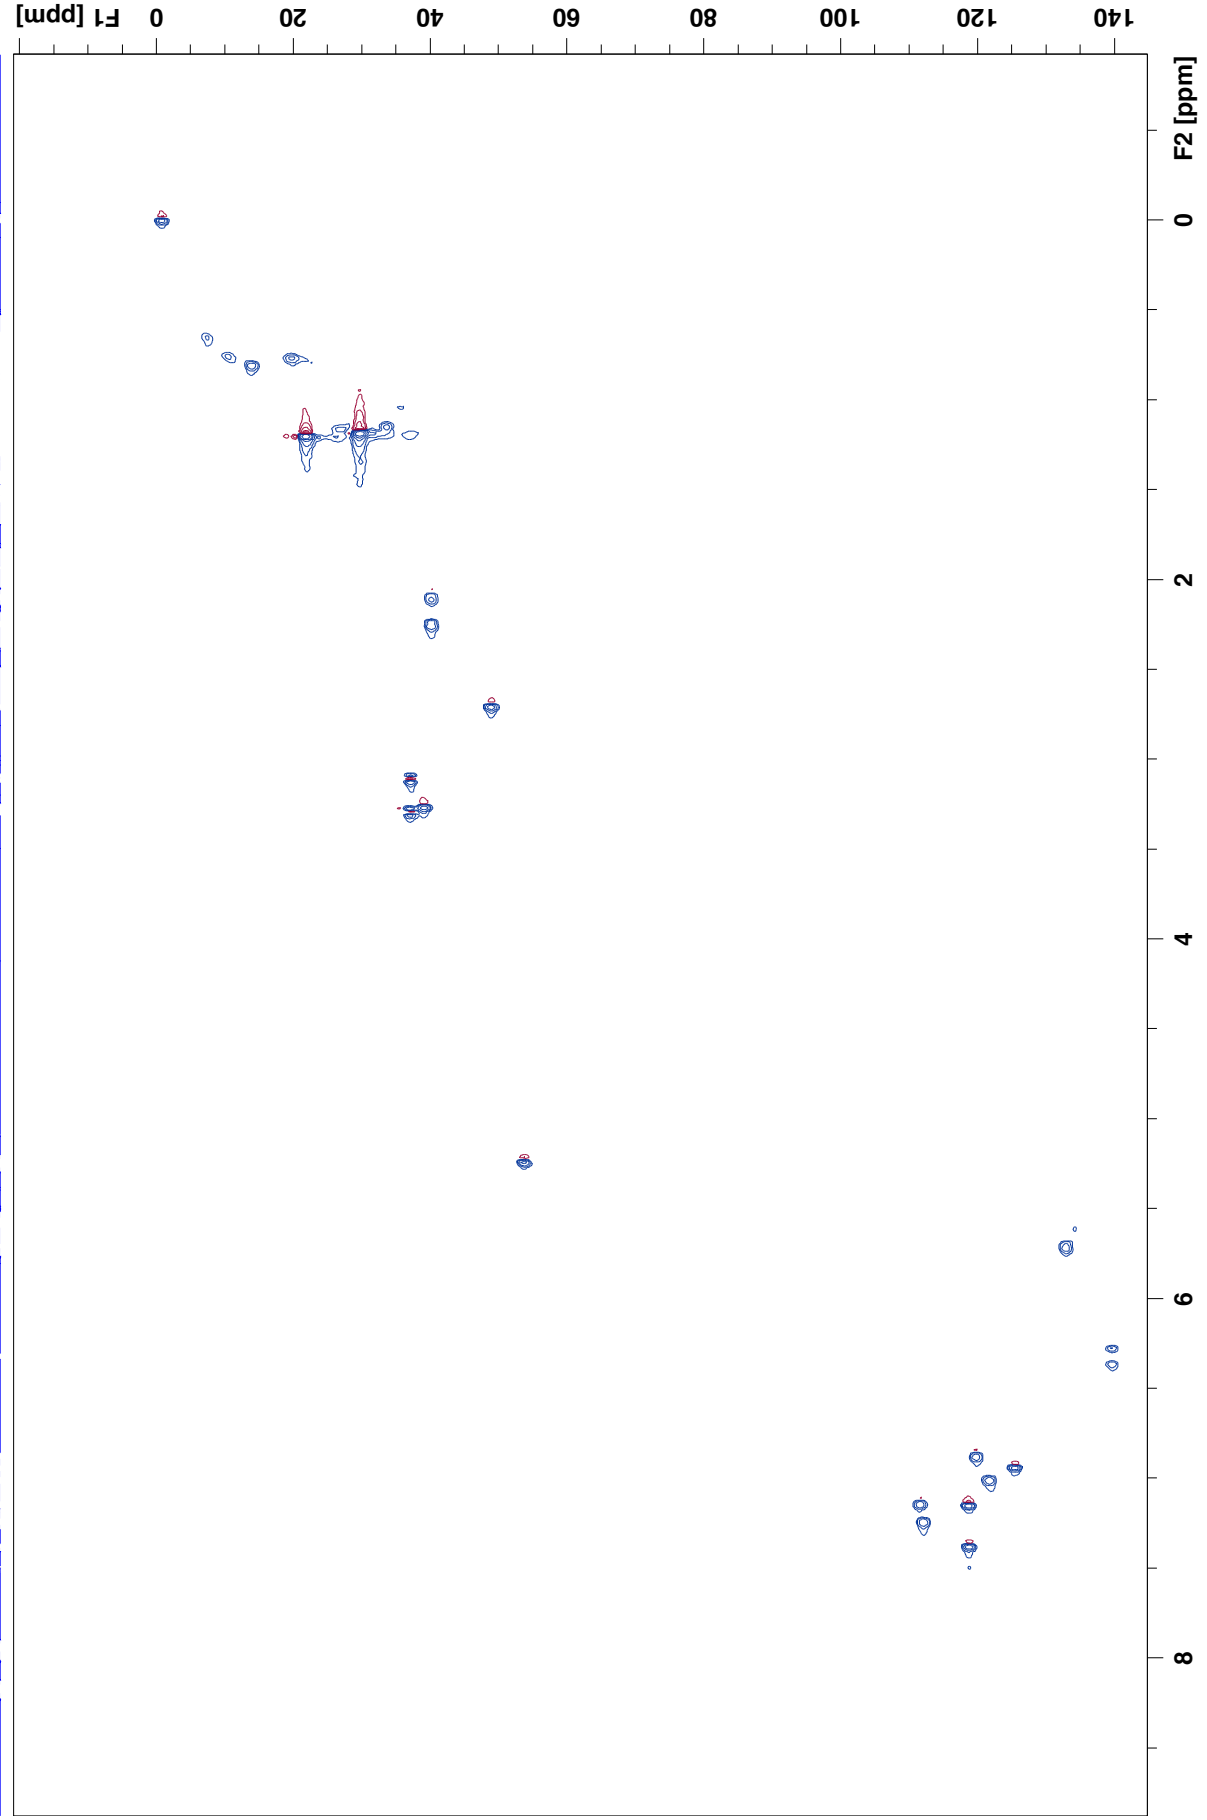



MT-N3-P128-TT22-24-5-6-C 15 1 N:\b600\wu\data\wu\_guest\hmr

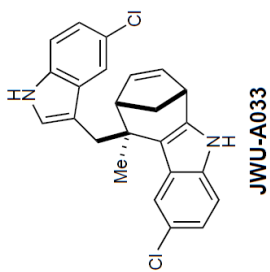

S33

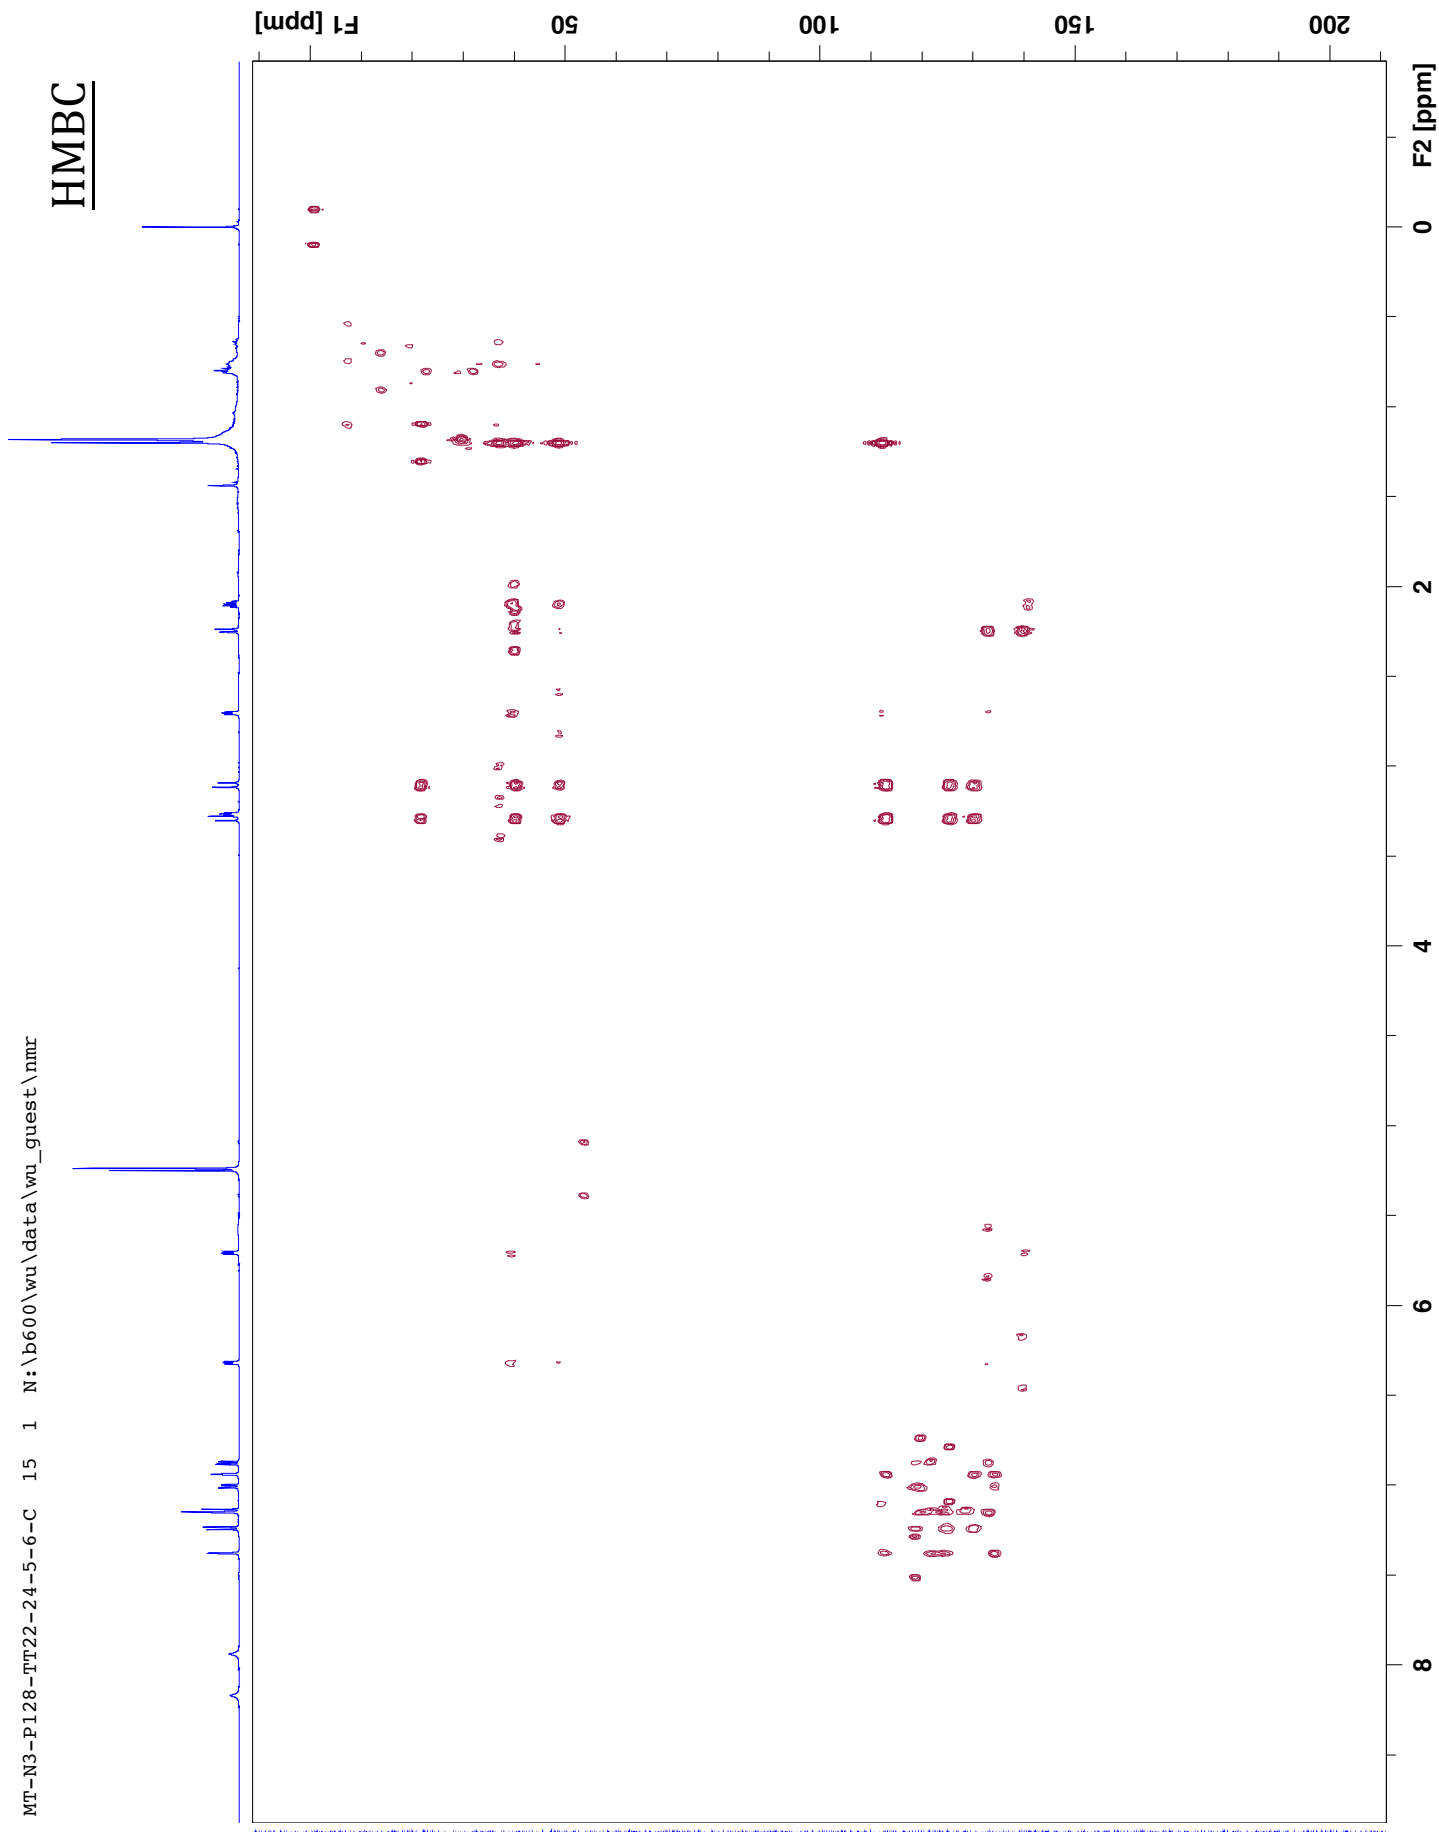

MT-N3-P128-TT22-24-5-6-C 16 1 N:\b600\wu\data\wu\_guest\hmr

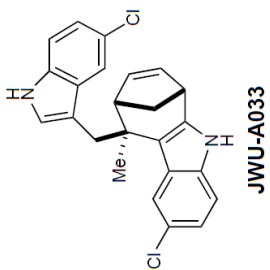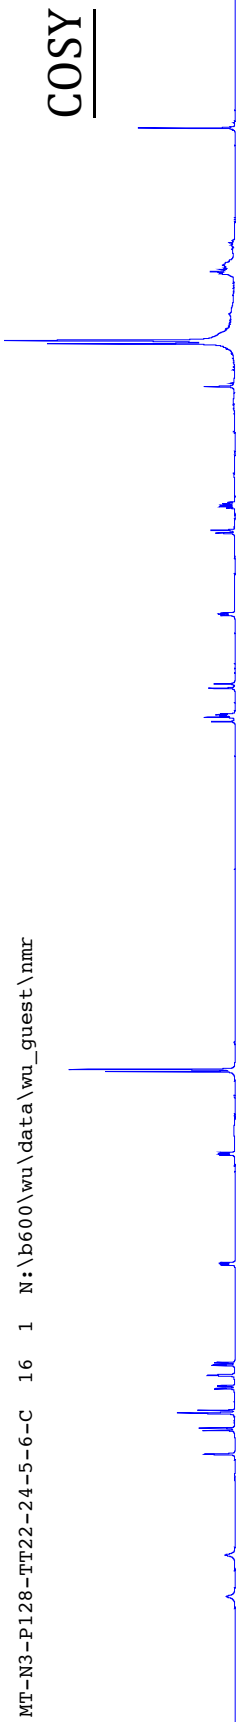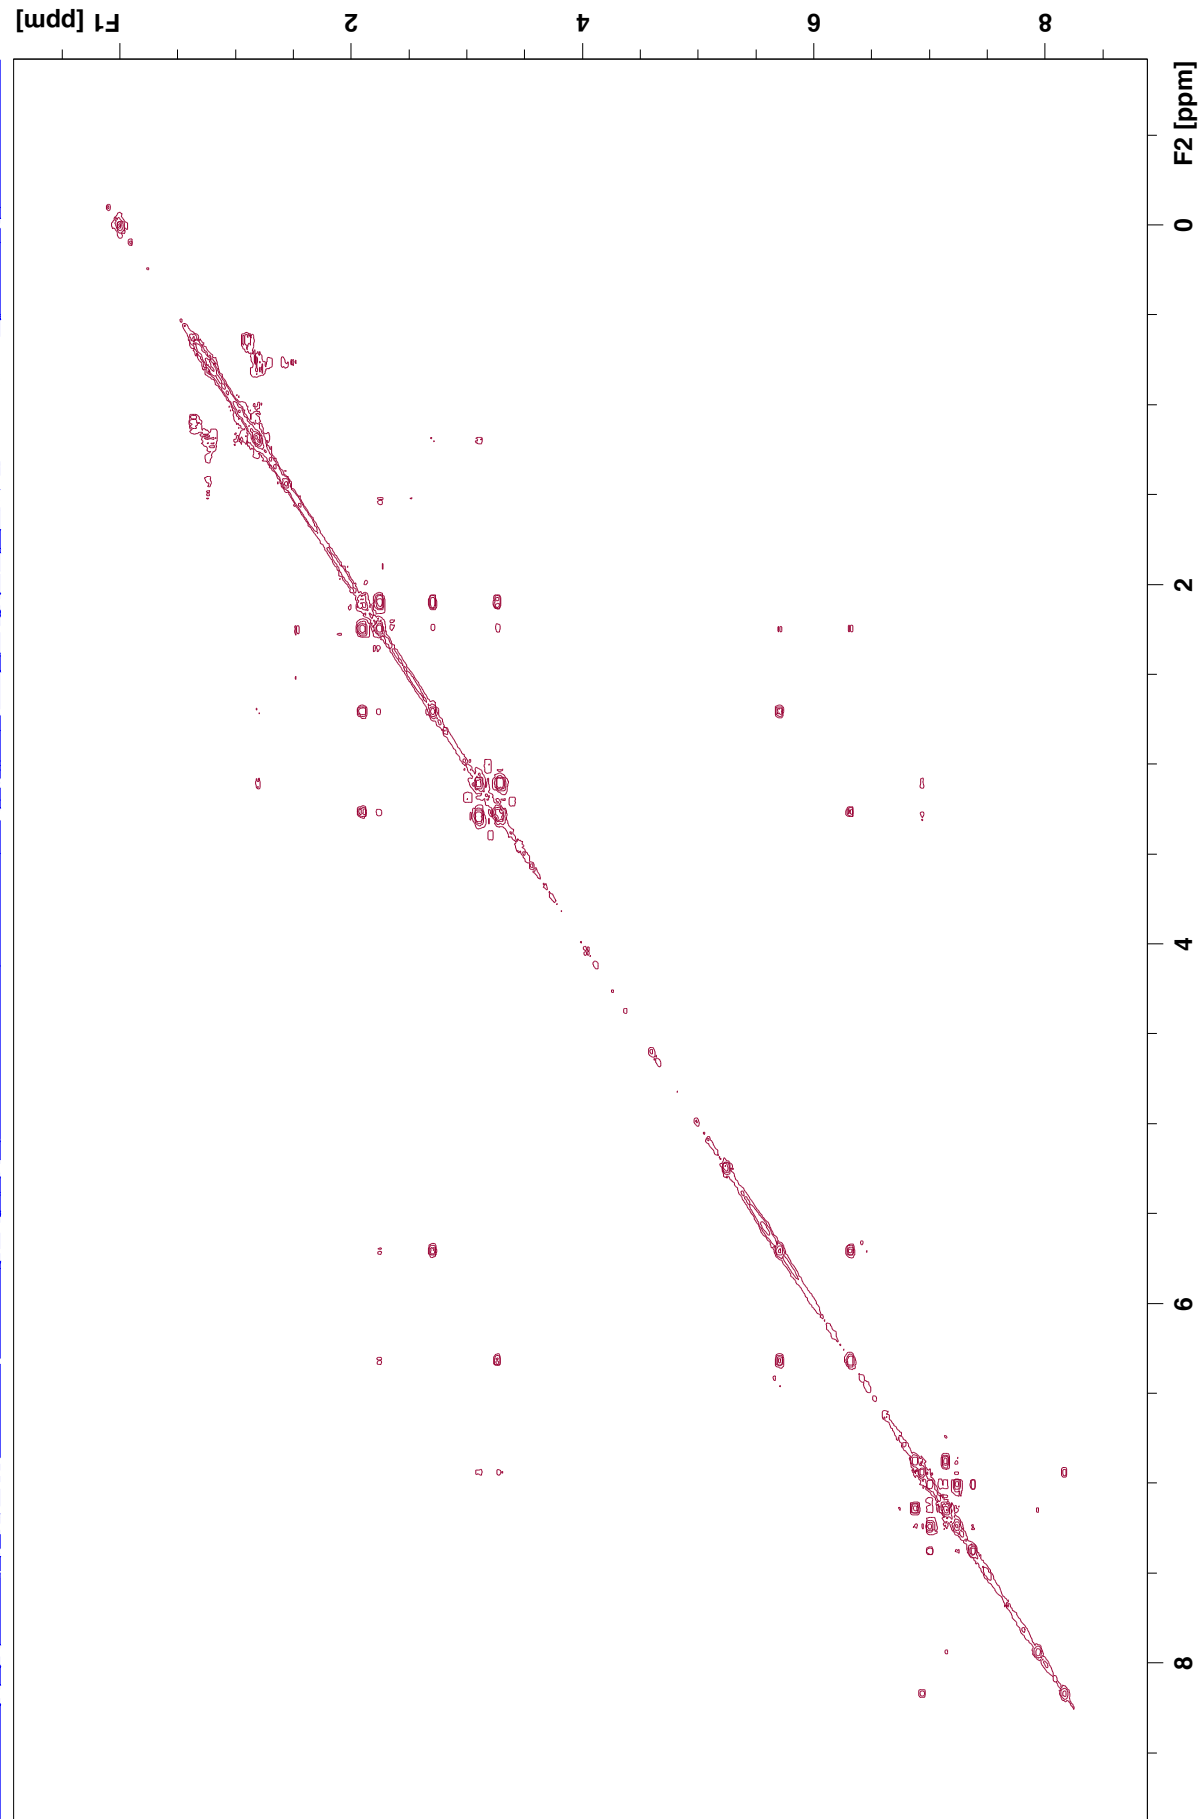

MT-N3-P128-TT22-24-5-6-C 17 1 N:\b600\wu\data\wu\_guest\hmr

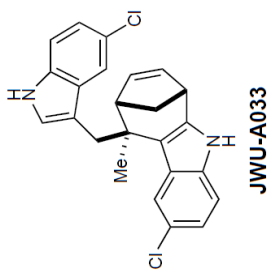

NOESY

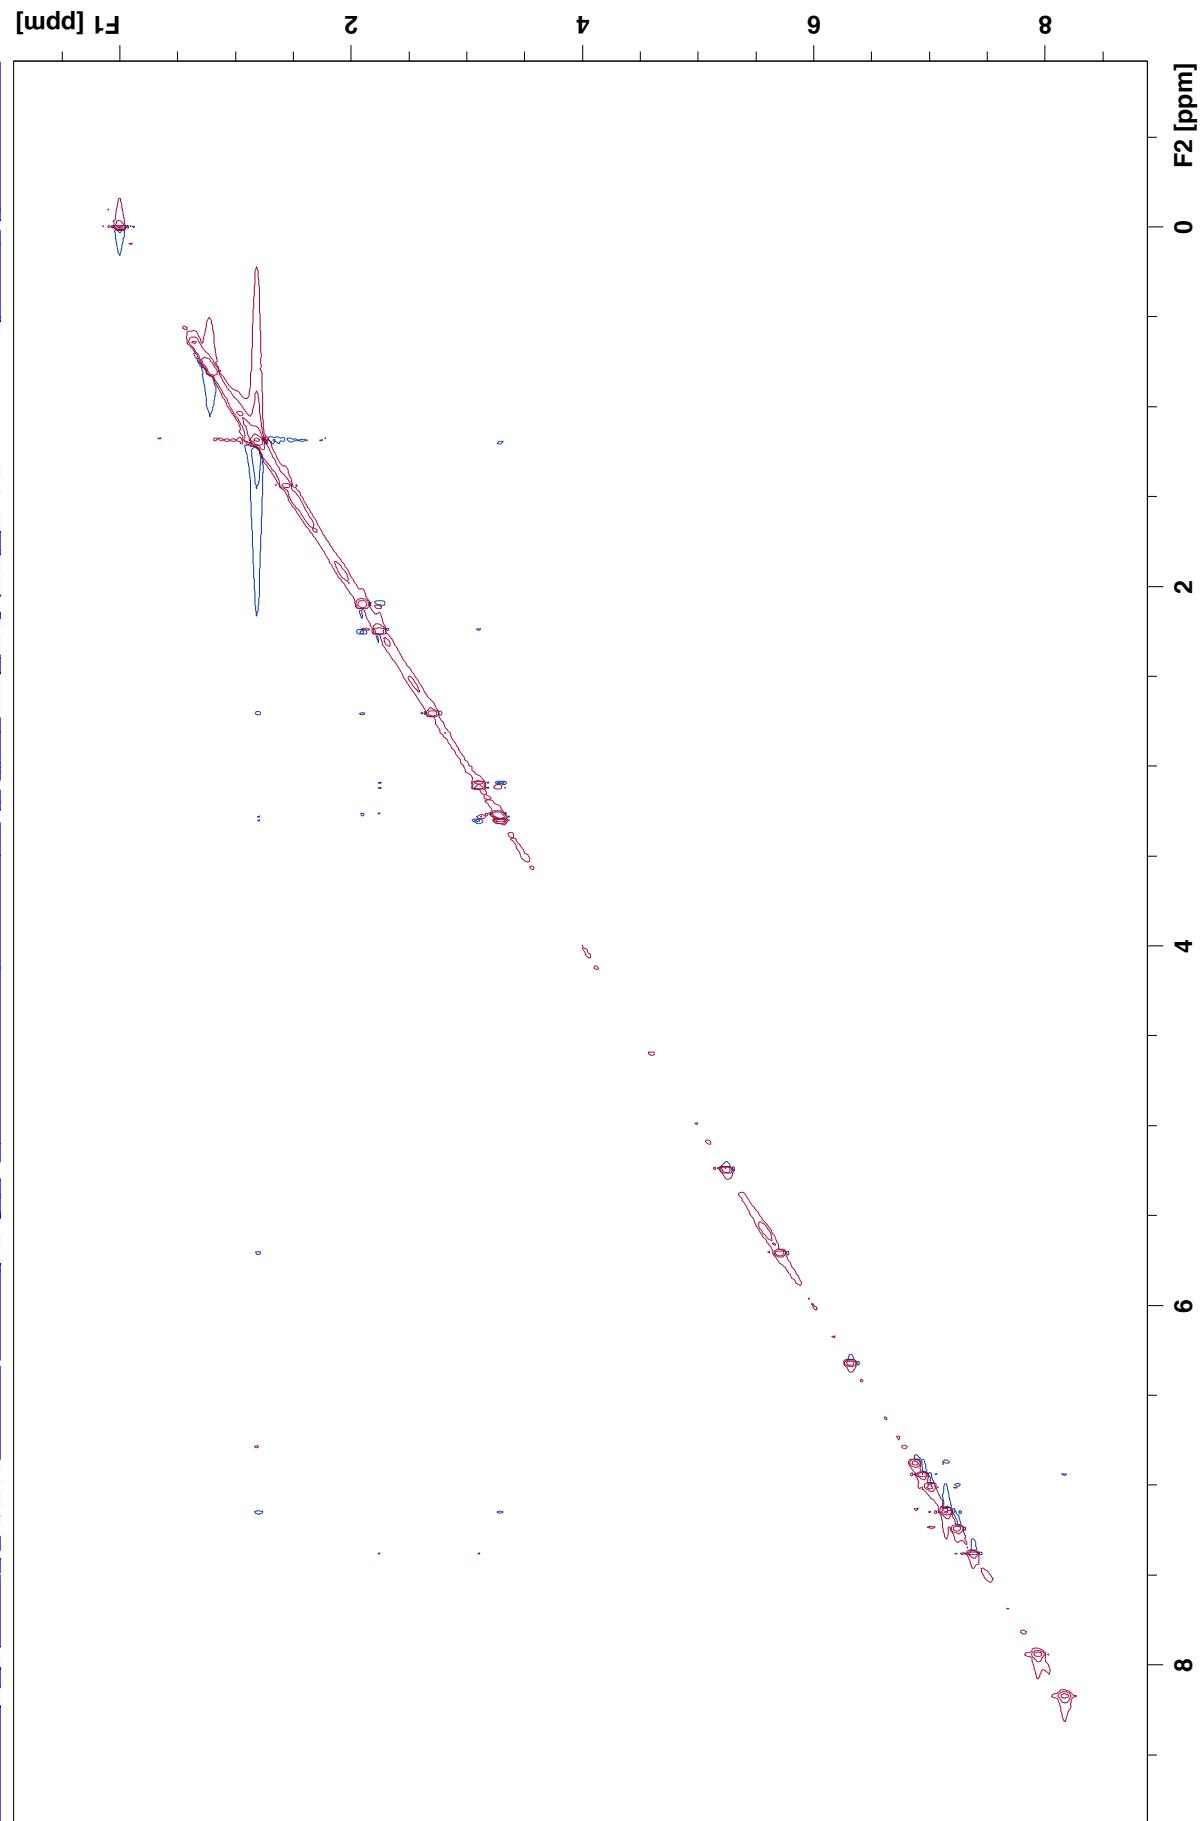

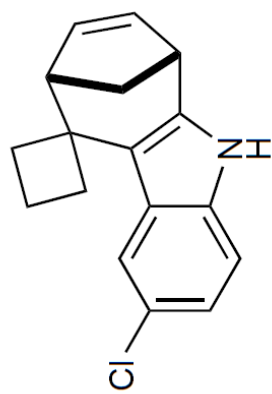

**JWU-A034**

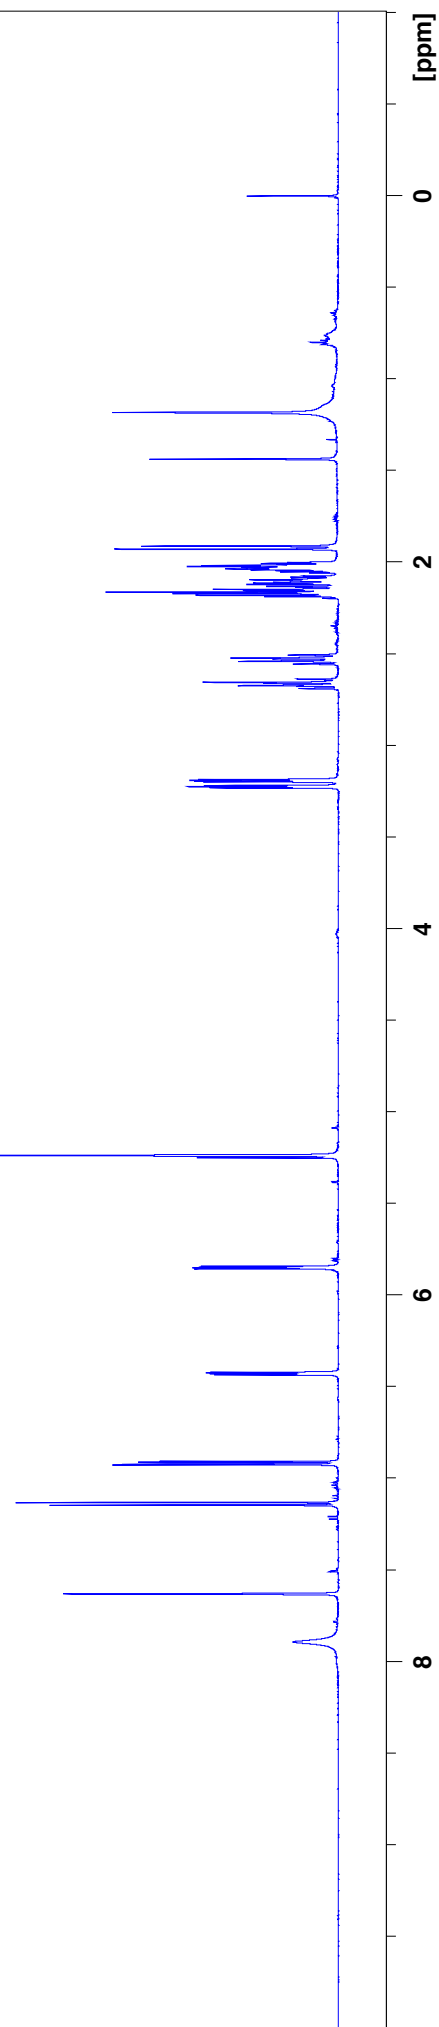

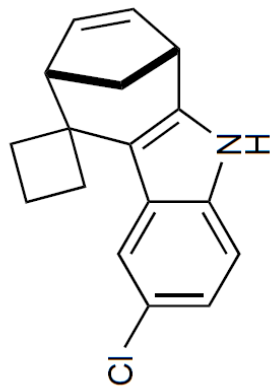

**JWU-A034**

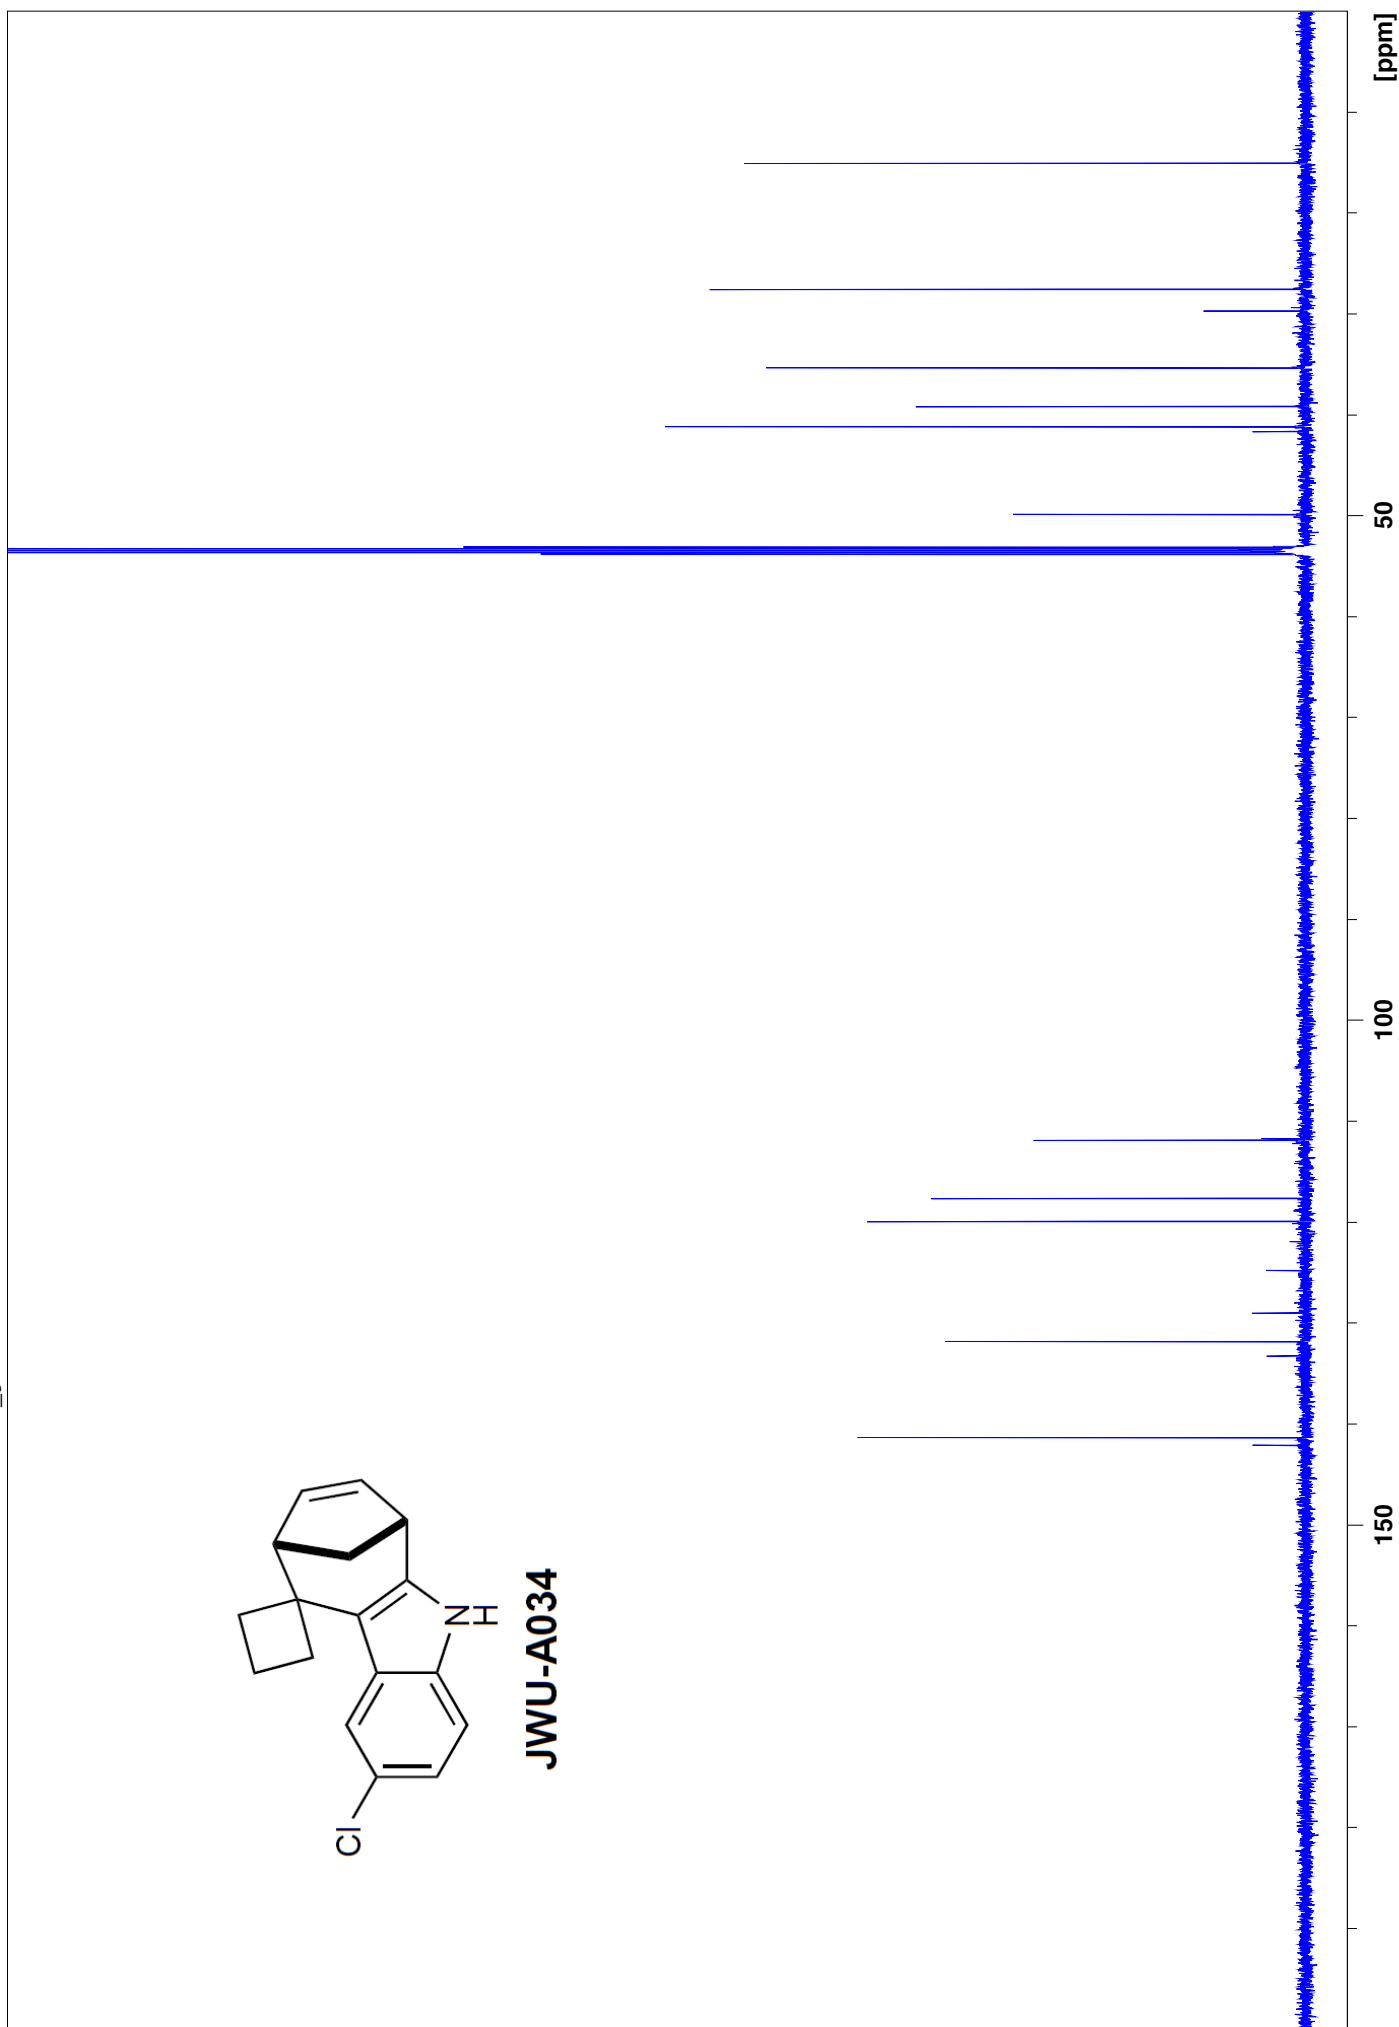

MT-N3-P114-TT12-17-10 15 1 N:\b600\wu\data\wu\_guest\nmr

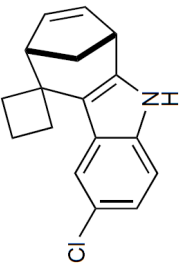

HMQC

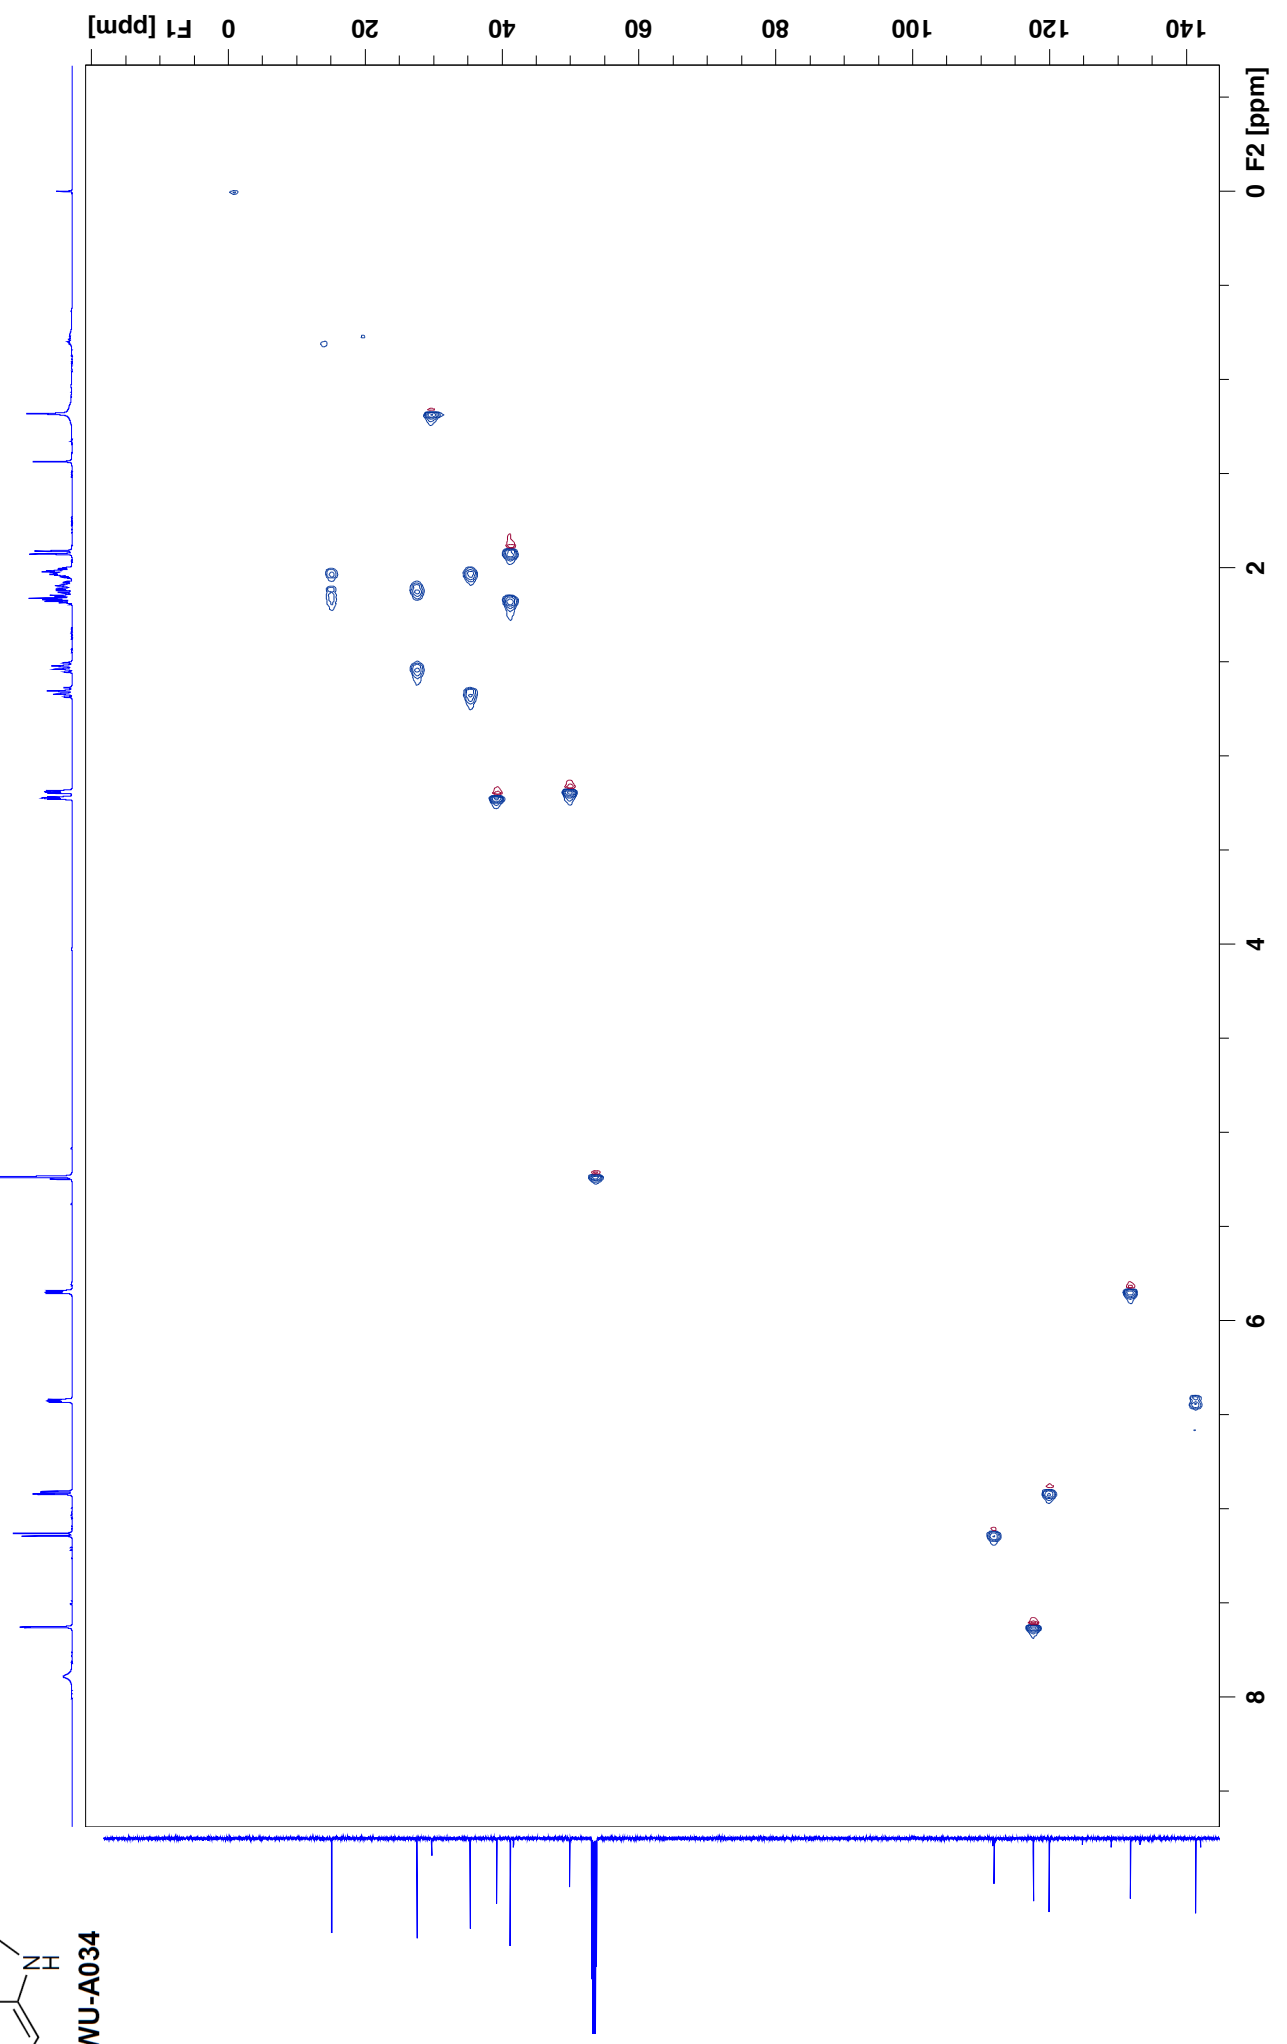

S38

MT-N3-P114-TT12-17-10 14 1 N:\b600\wu\data\wu\_guest\nmr

# HMBC

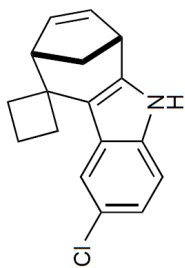

JWU-A034

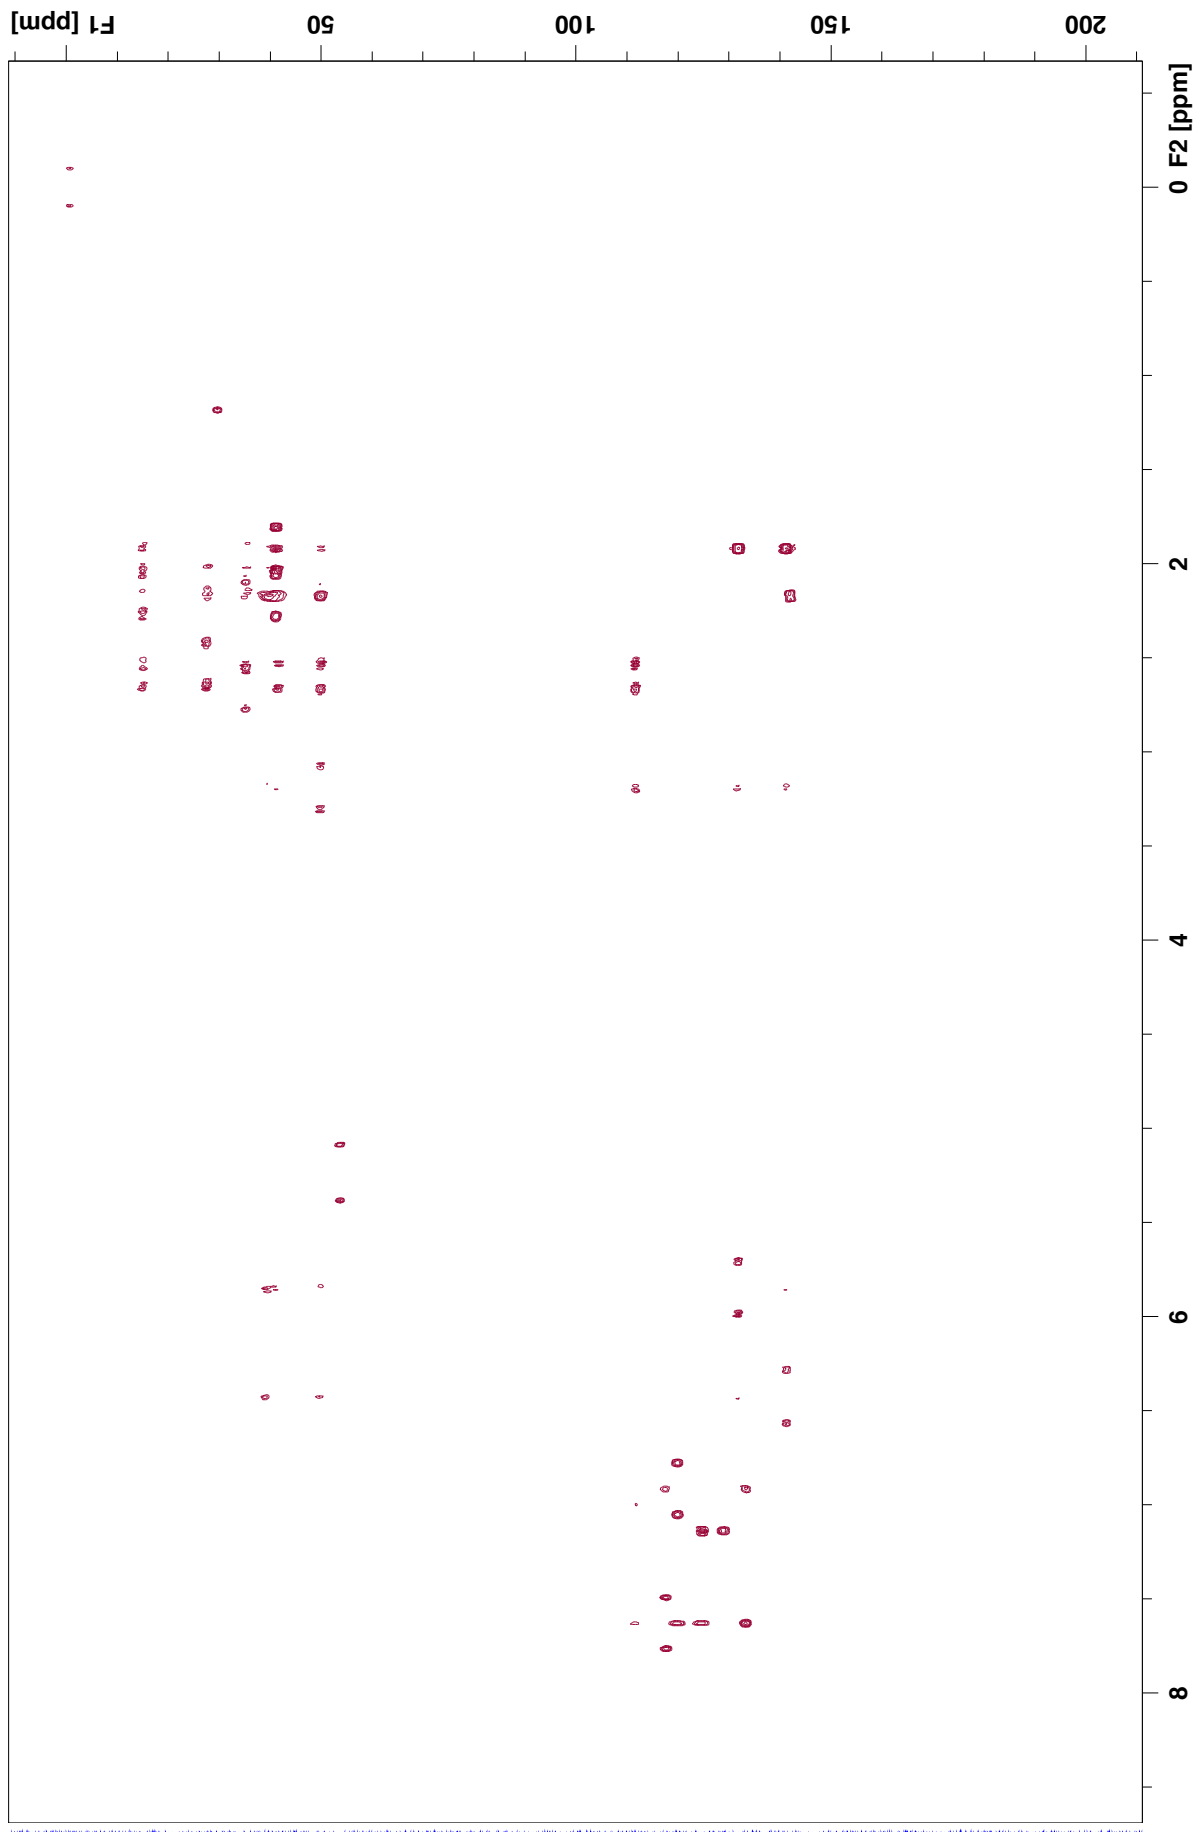

MT-N3-P114-TT12-17-10 16 1 N:\b600\wu\data\wu\_guest\nmr

# COSY

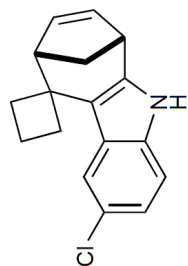

JWU-A034

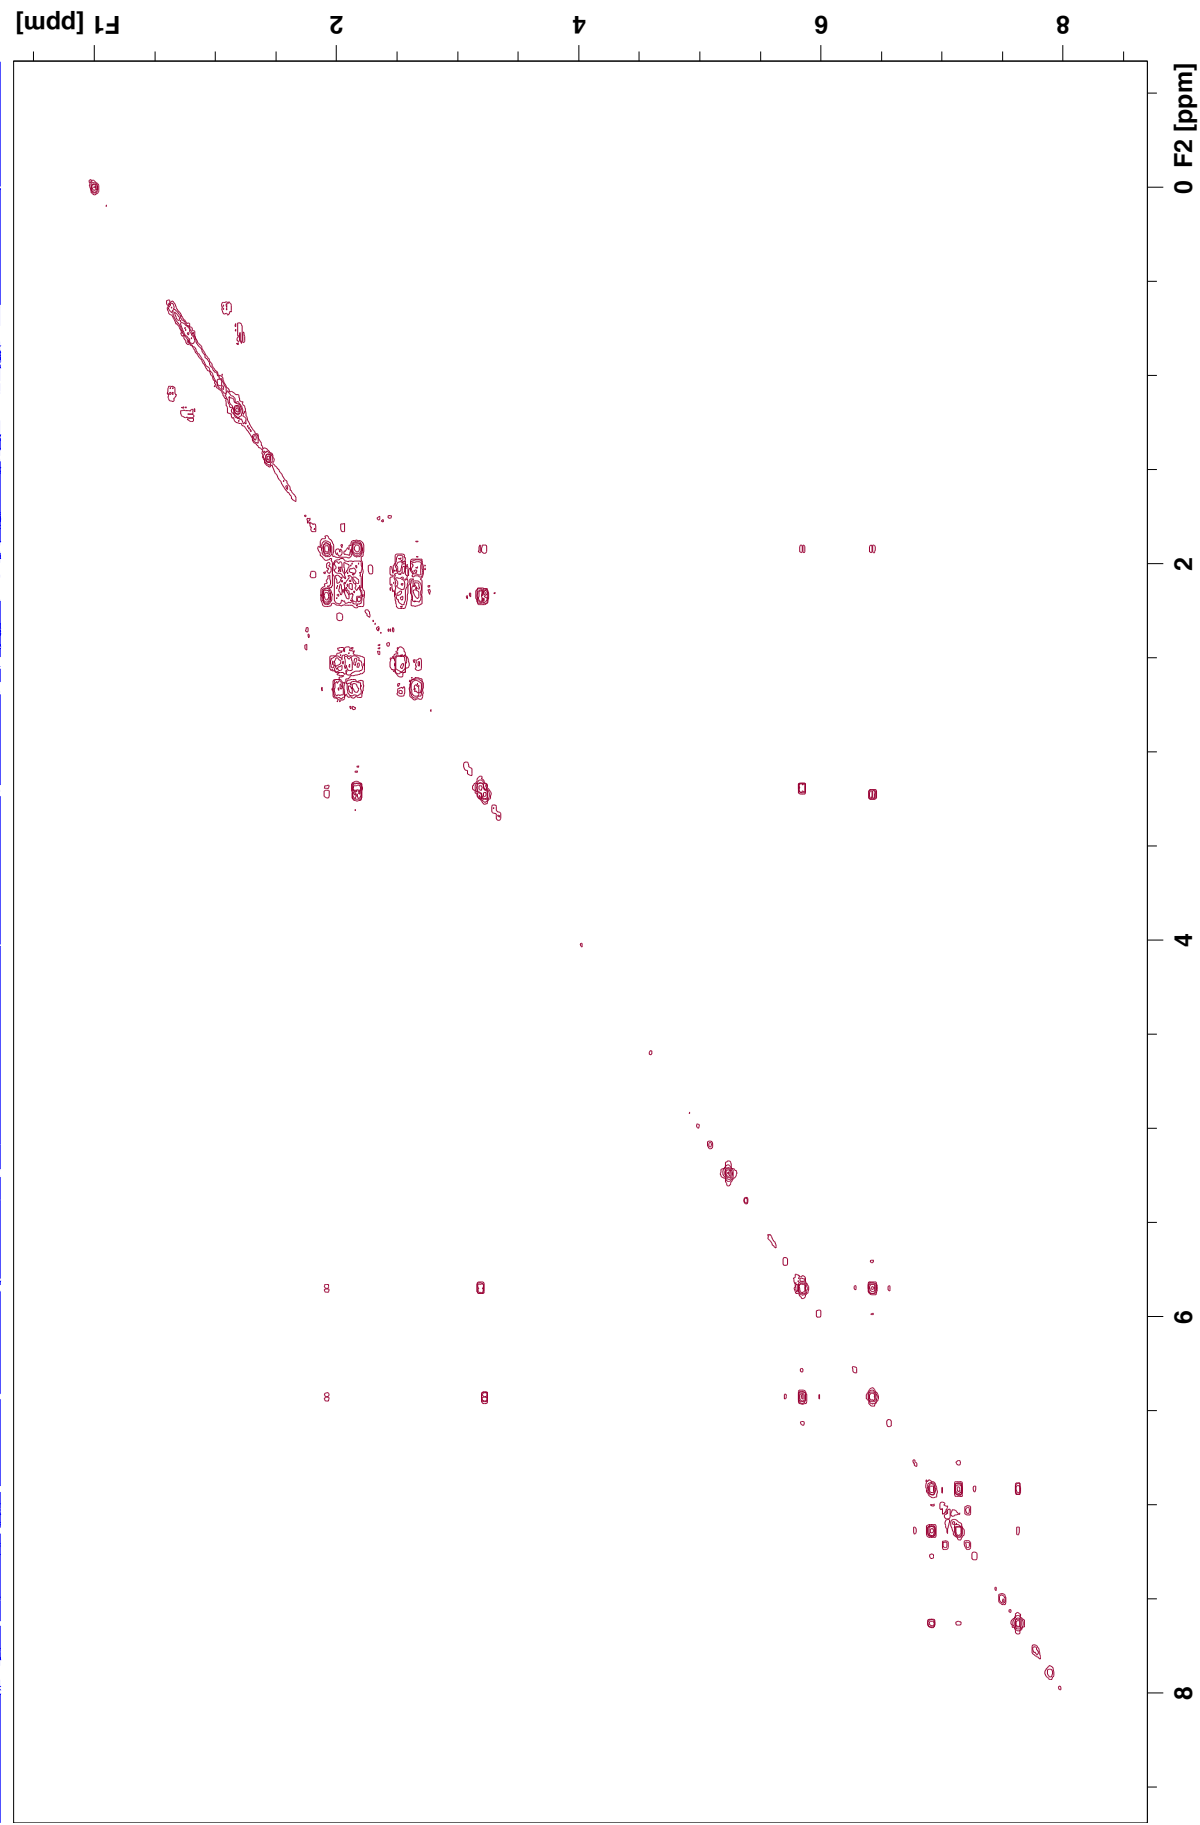



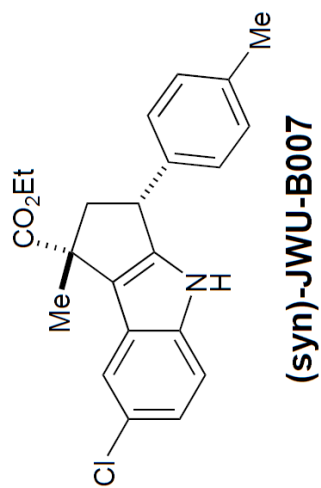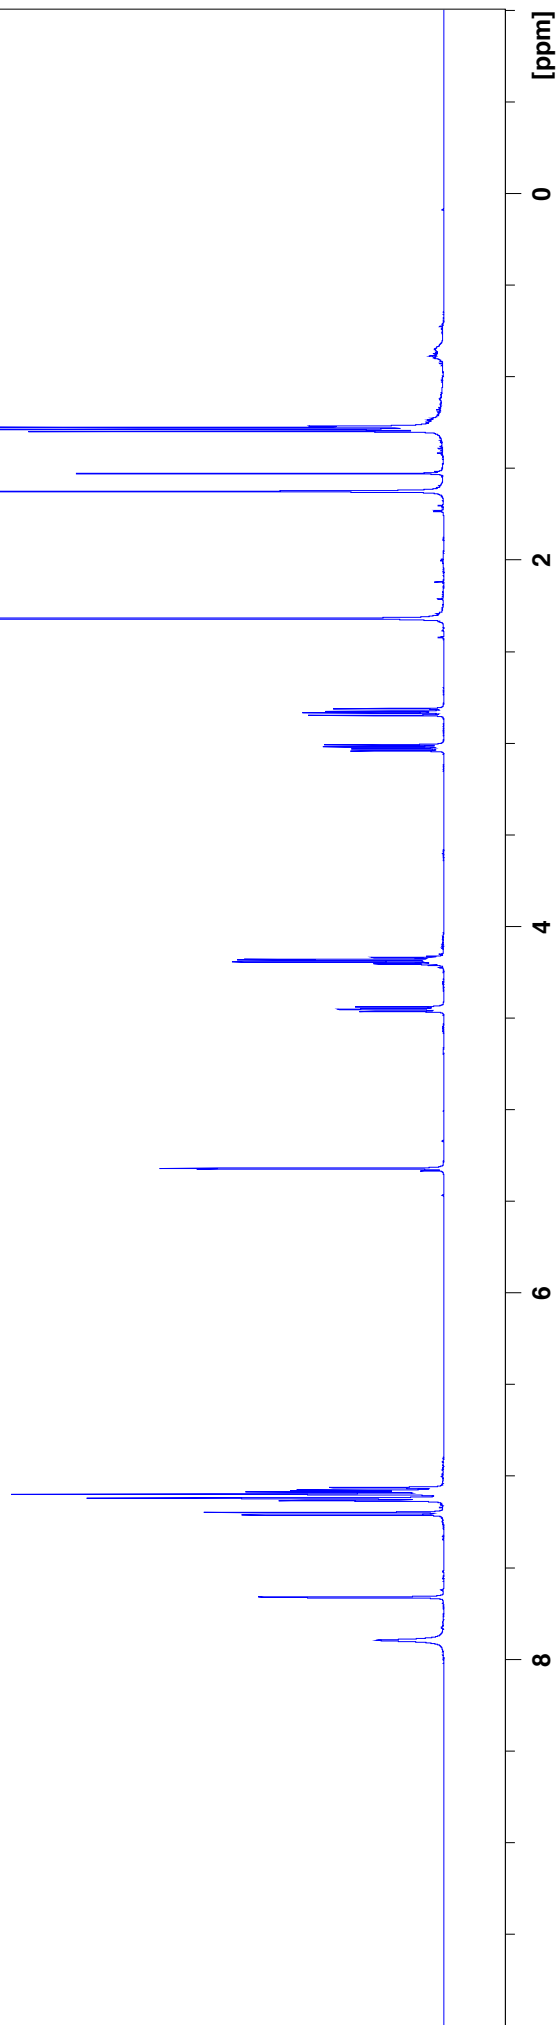

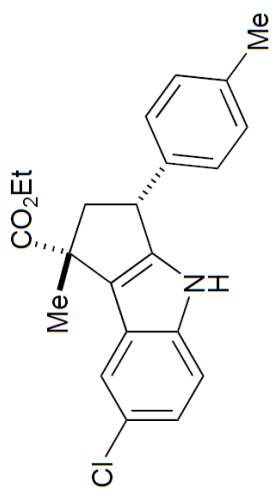

(syn)-JWU-B007

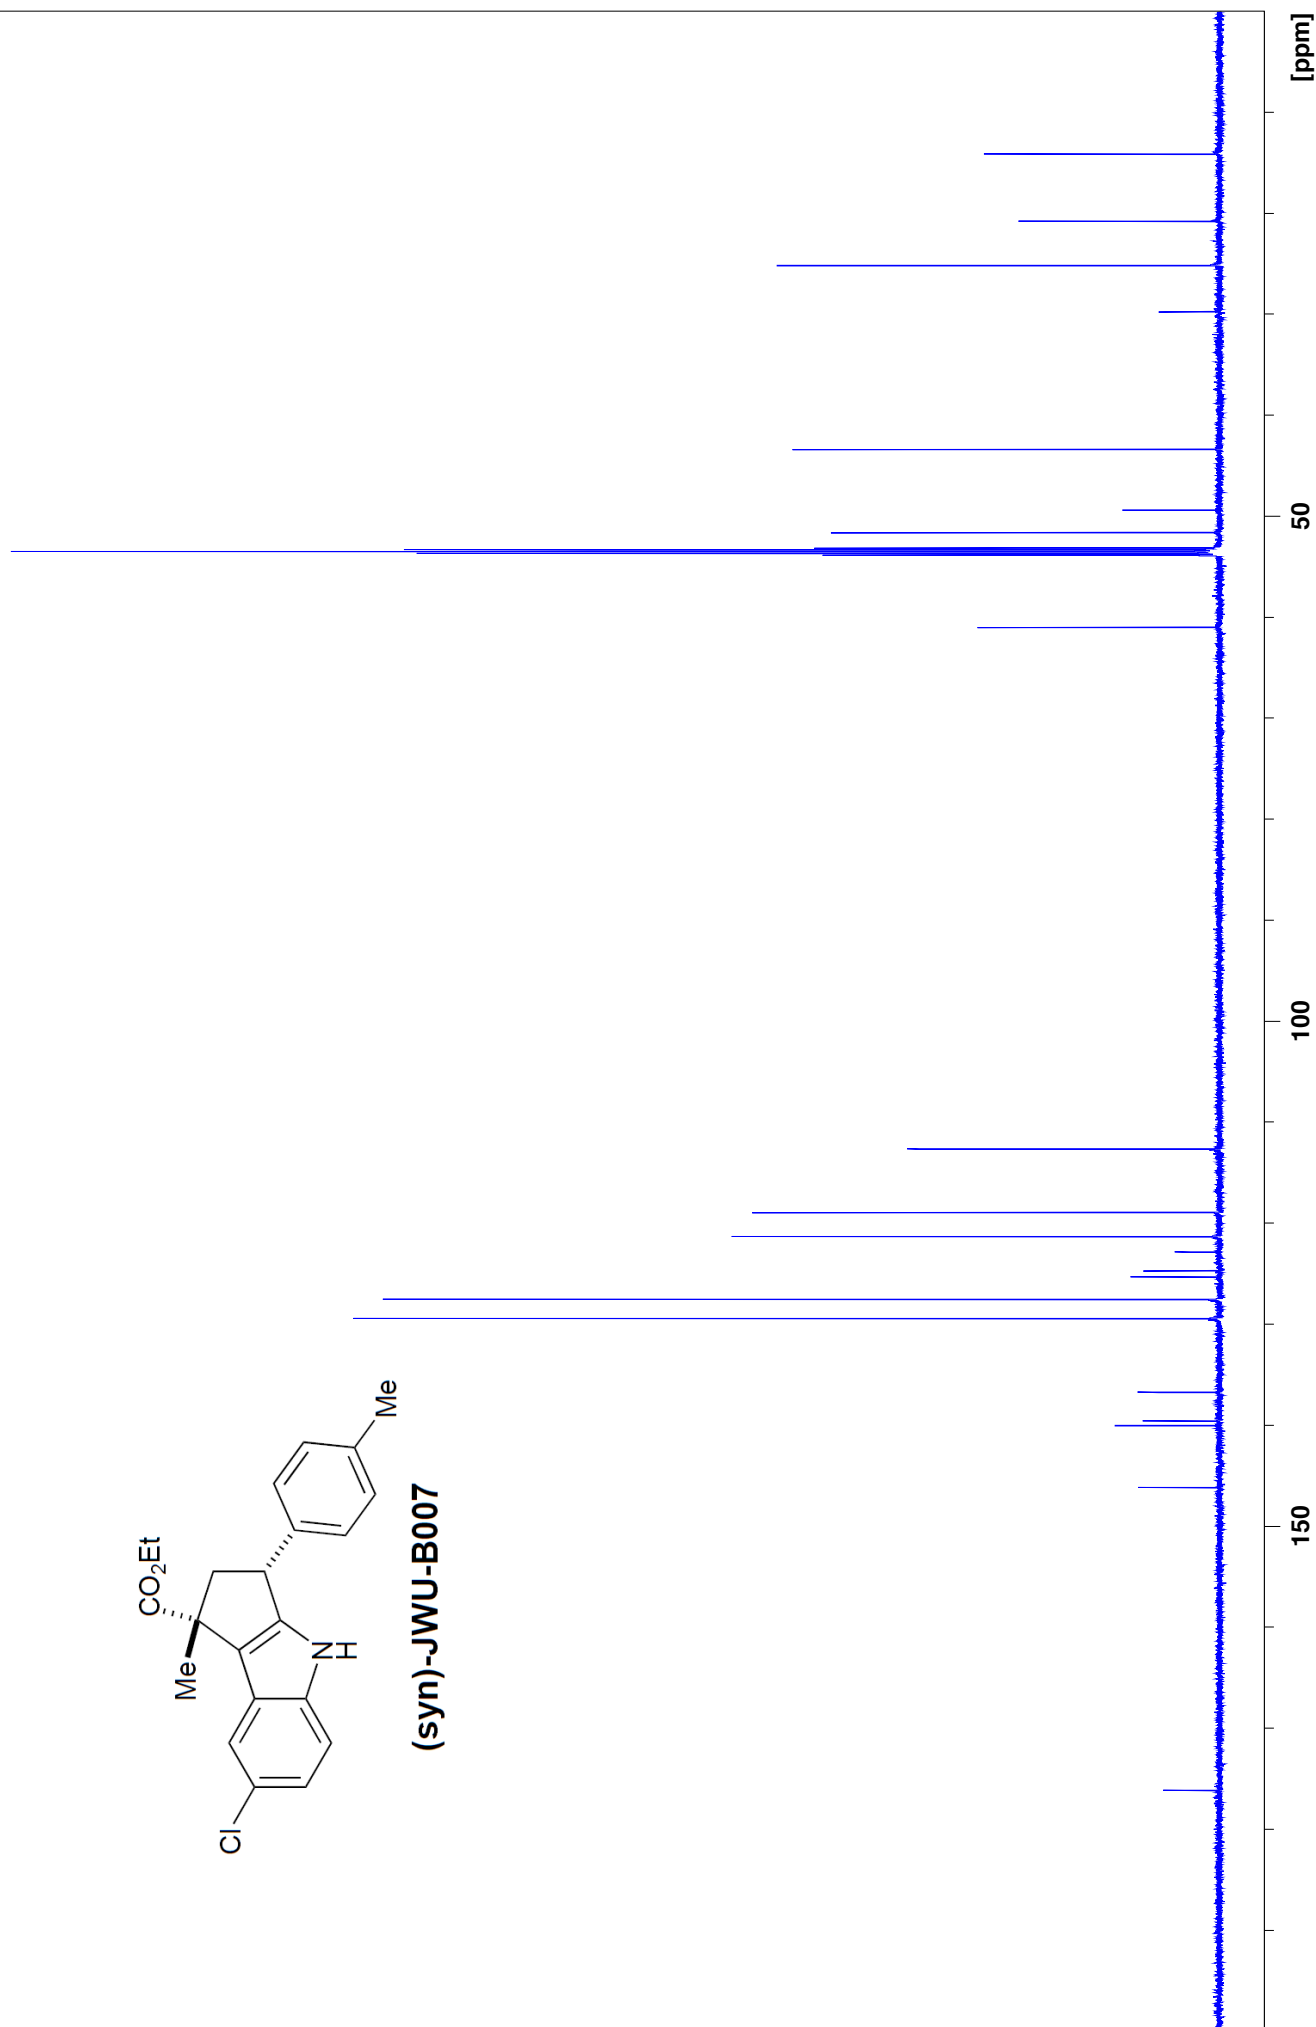

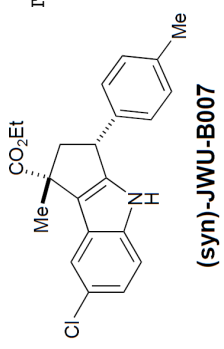

Γ-N3-P30-IT19-7-8 23 1 "I:\3+2 Products"

HMQC

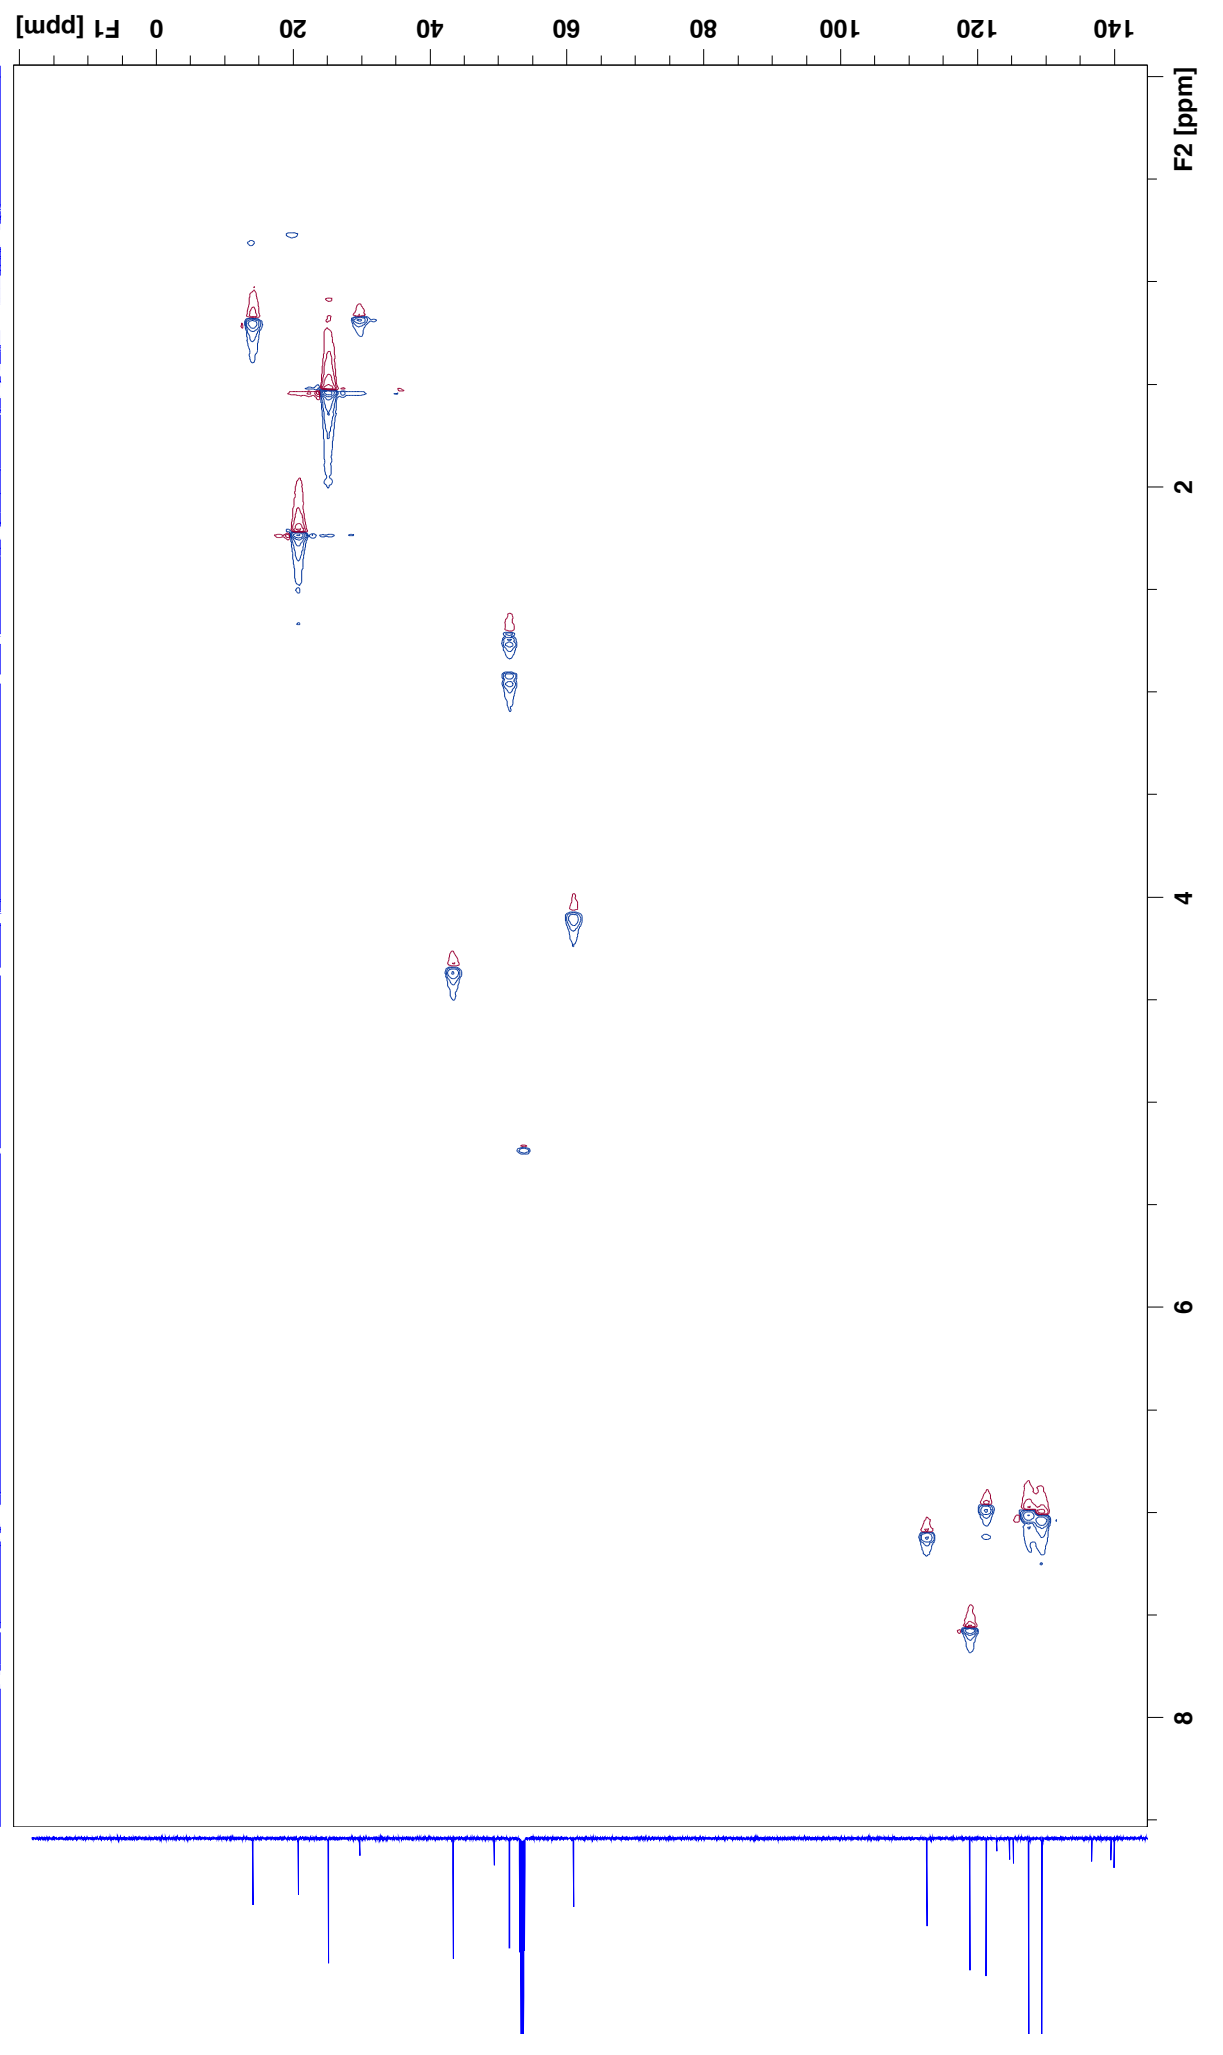

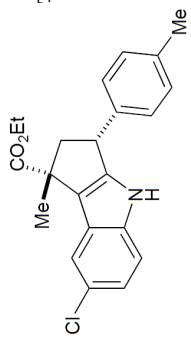

(syn)-JWU-B007

T-N3-P30-TT19-7-8 24 1 "I:\3+2 Products"

HMBC

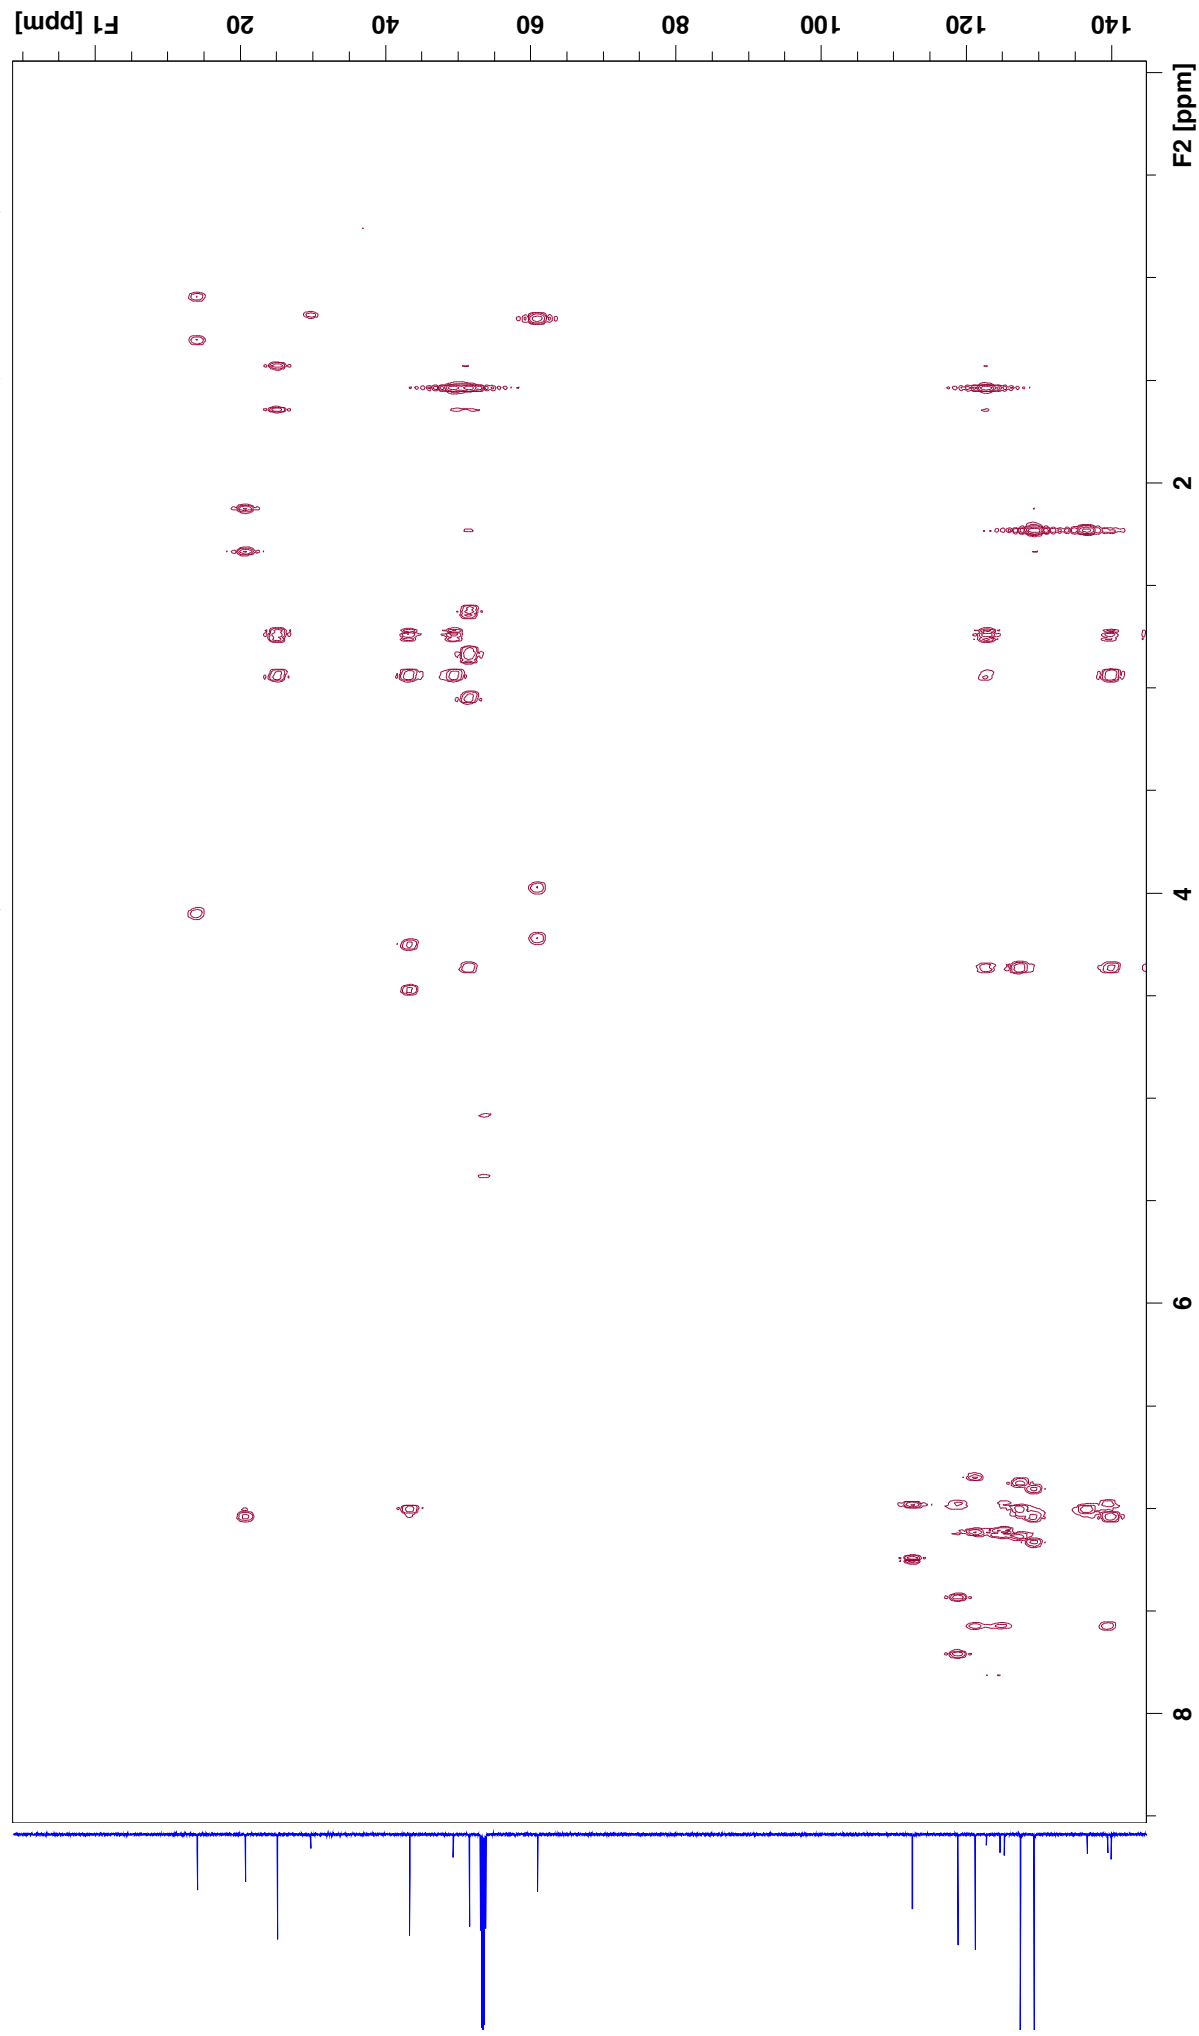

1-N3-P30-TT19-7-8 21 1 "I:\3+2 Products"

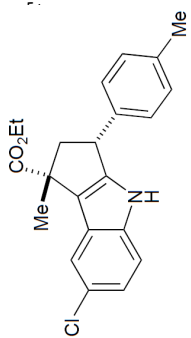

COSY

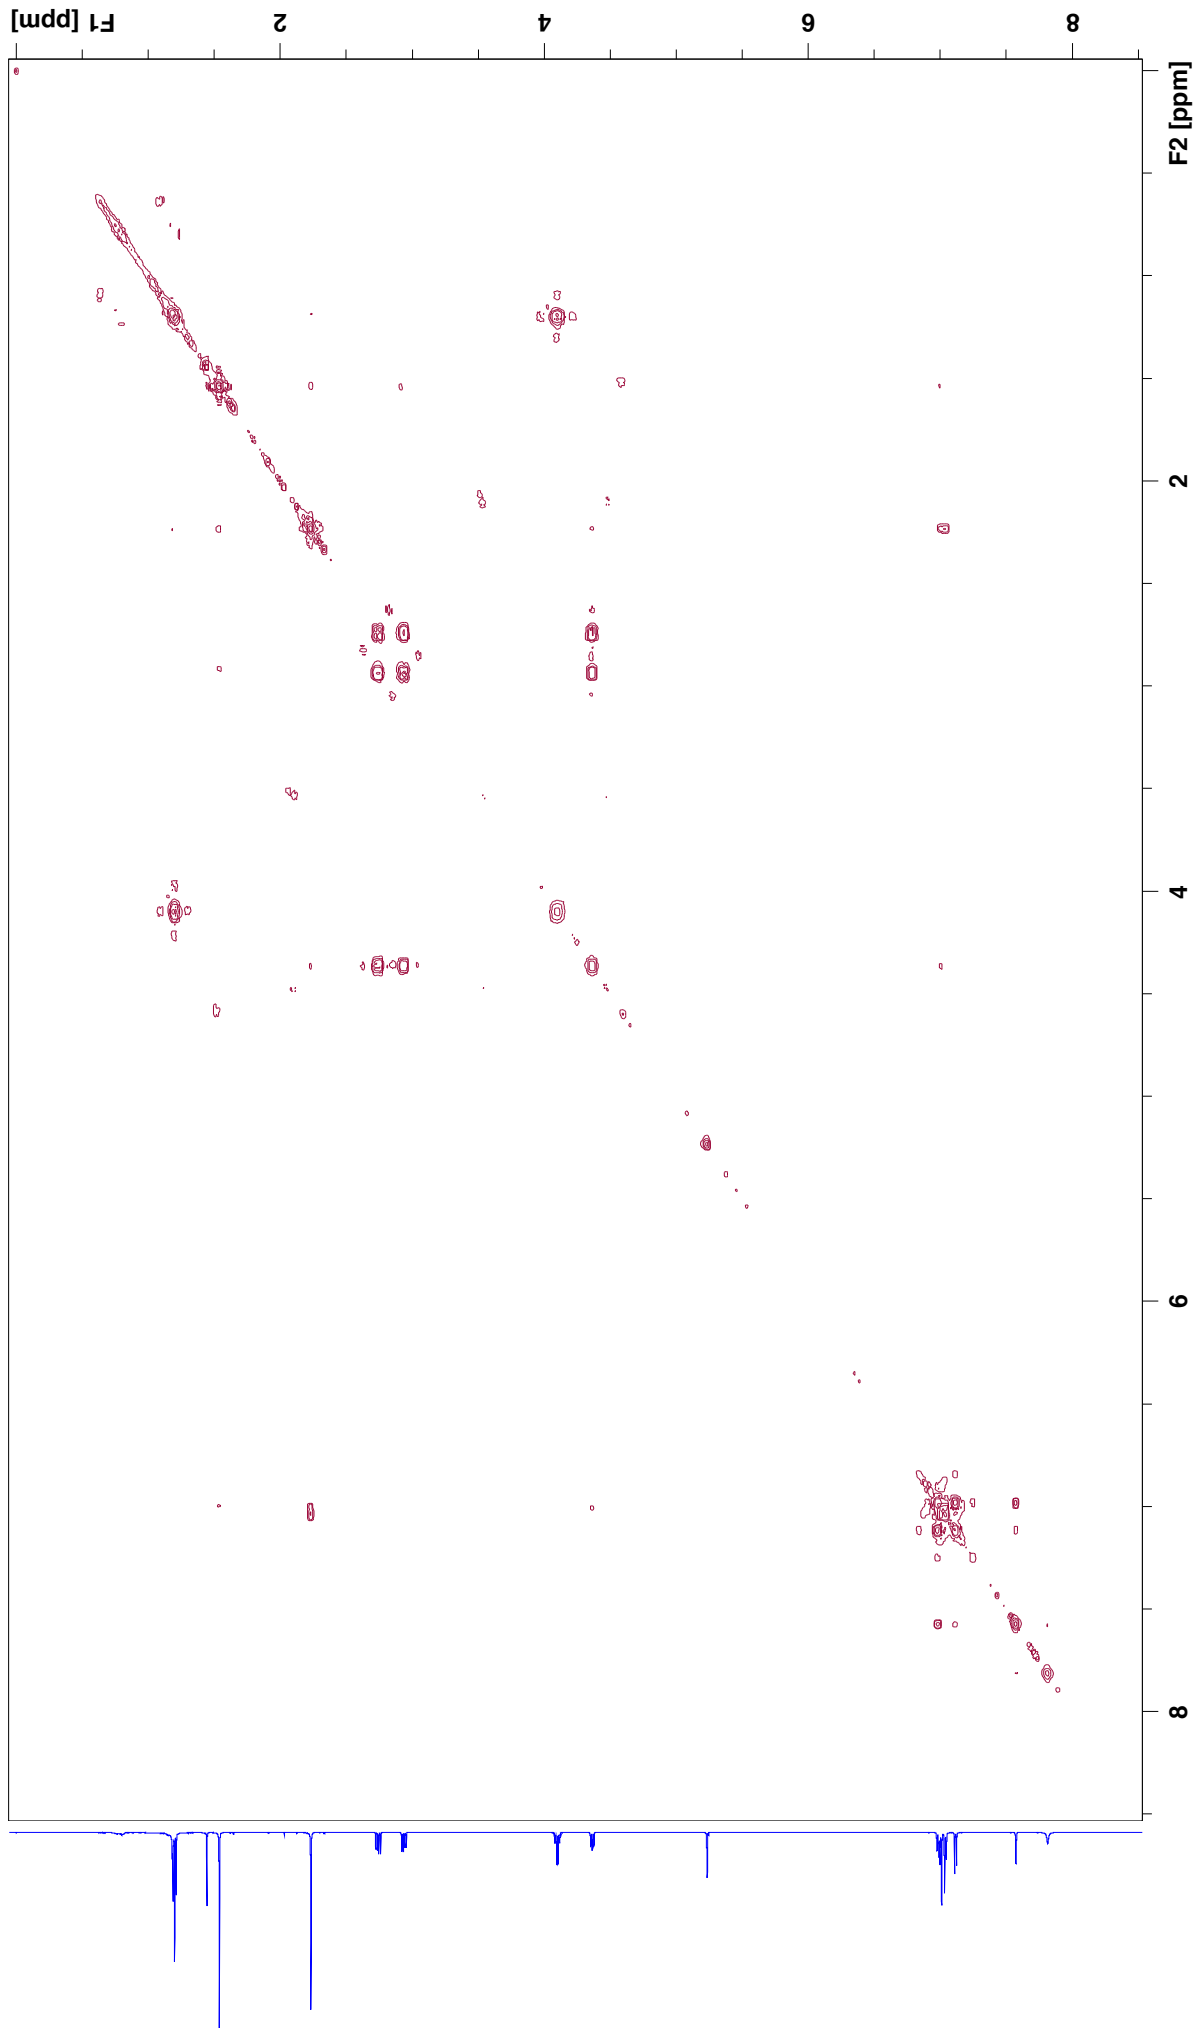

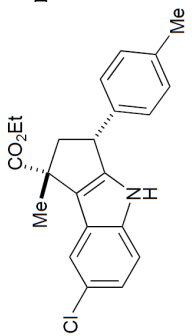

Γ-N3-P30-TT19-7-8 22 1 "I:\3+2 Products"

NOESY

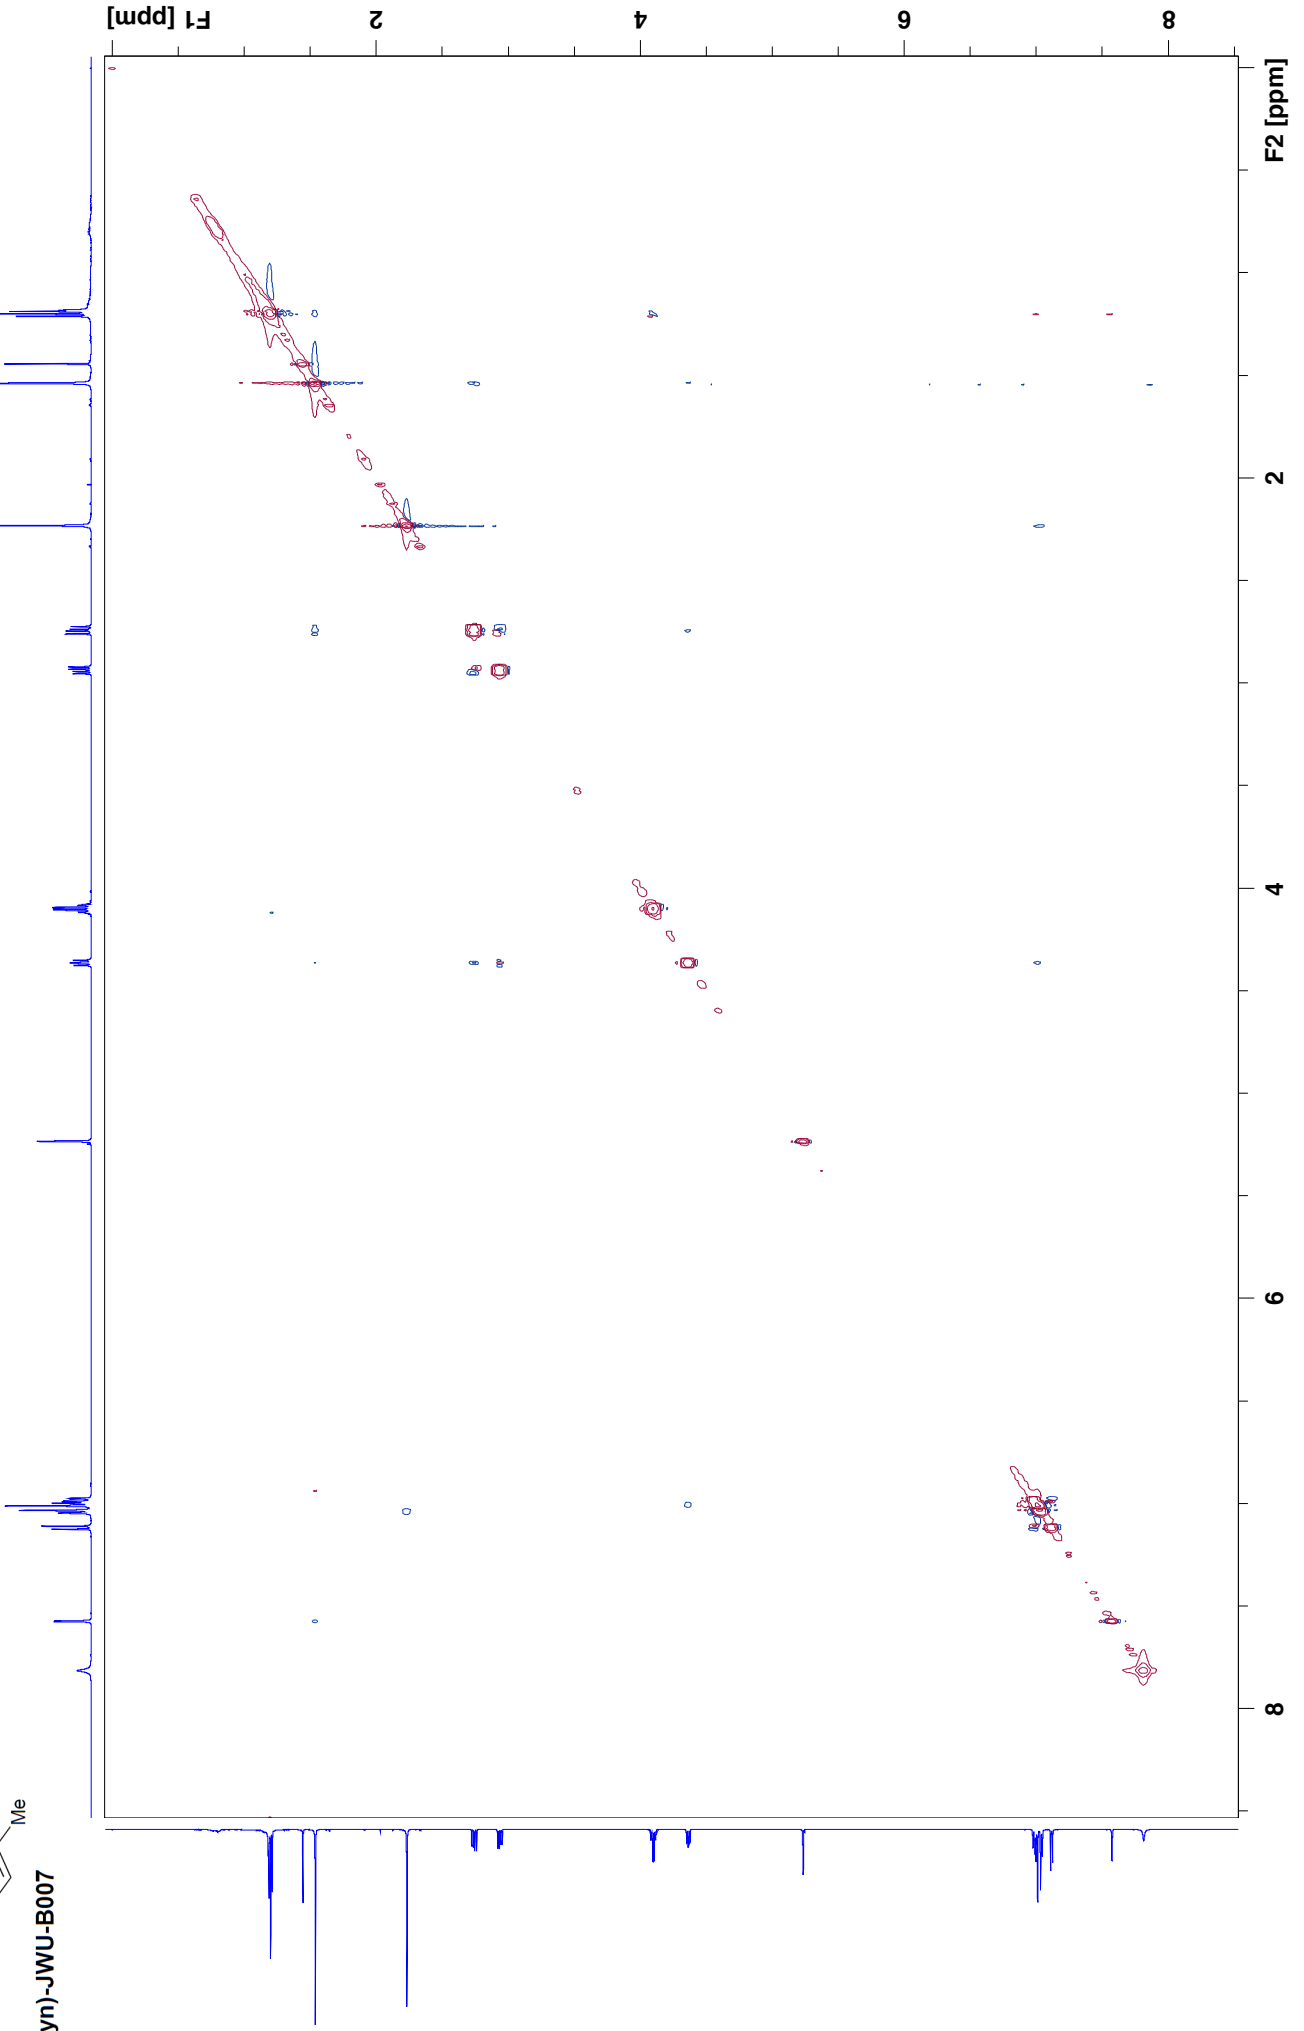

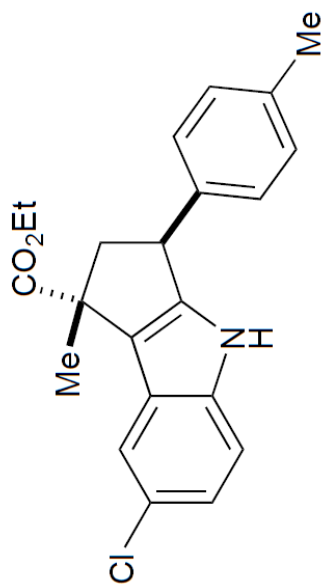

**(anti)-JWU-B008**

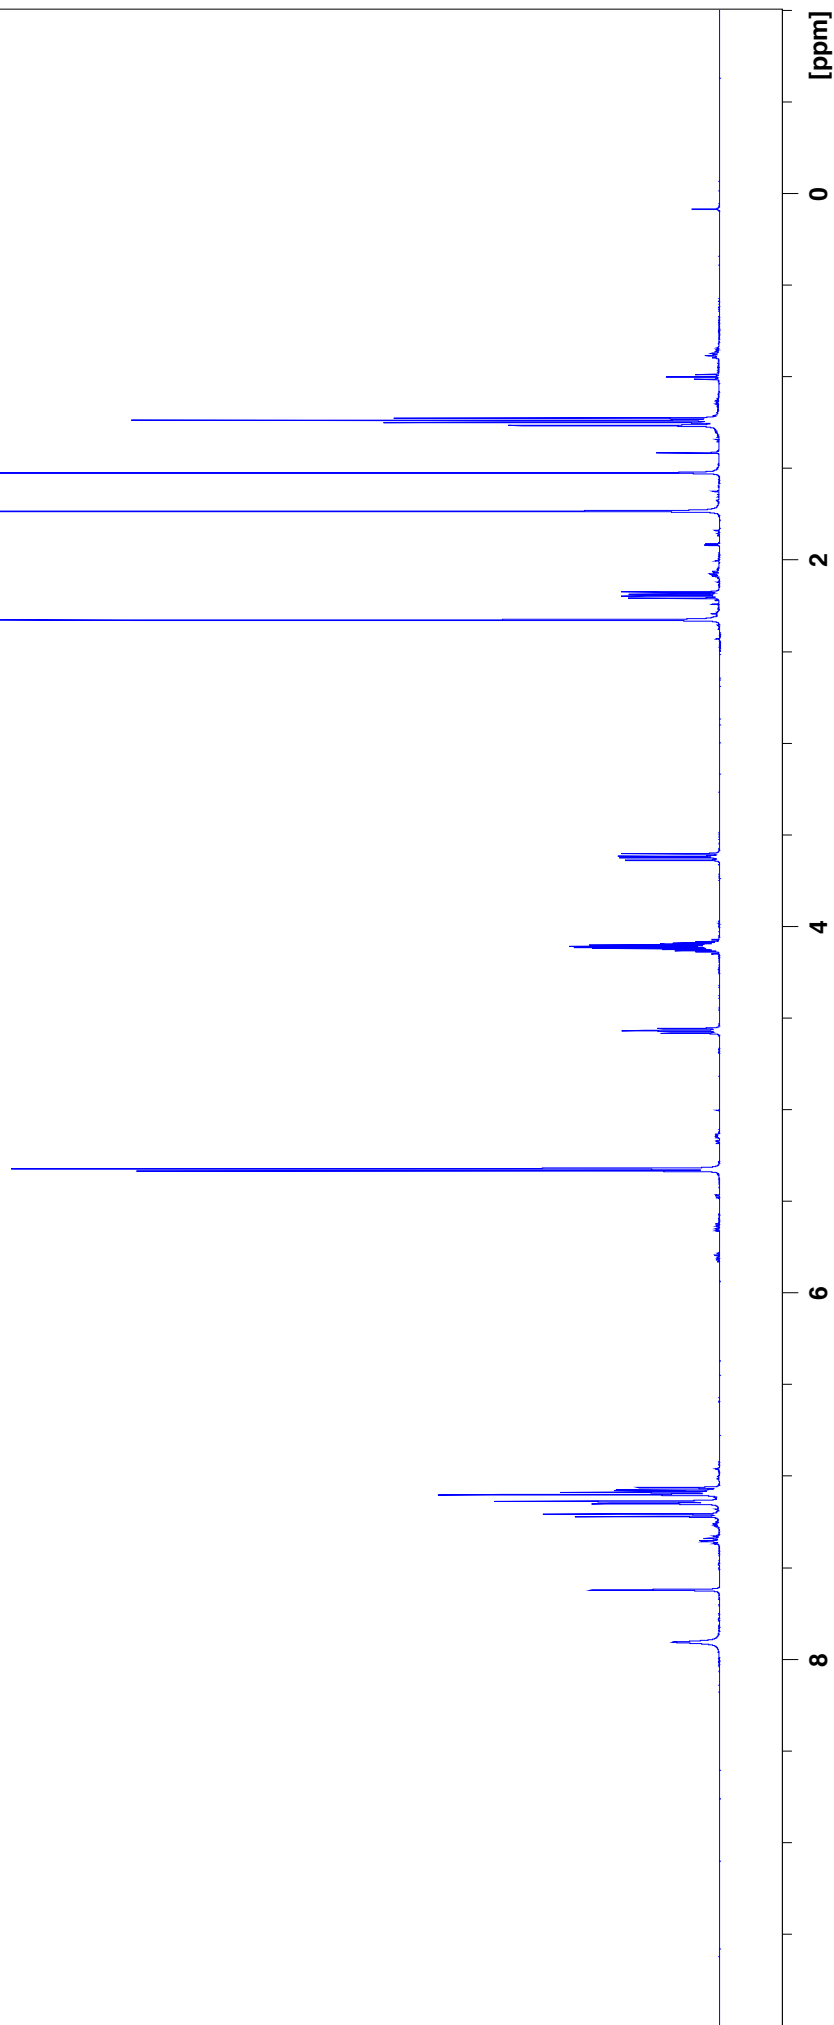

wu\_guest  
wu

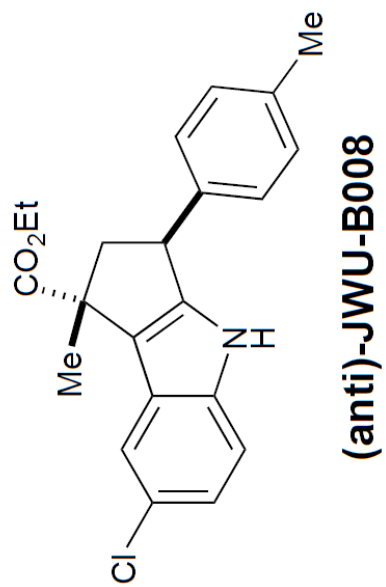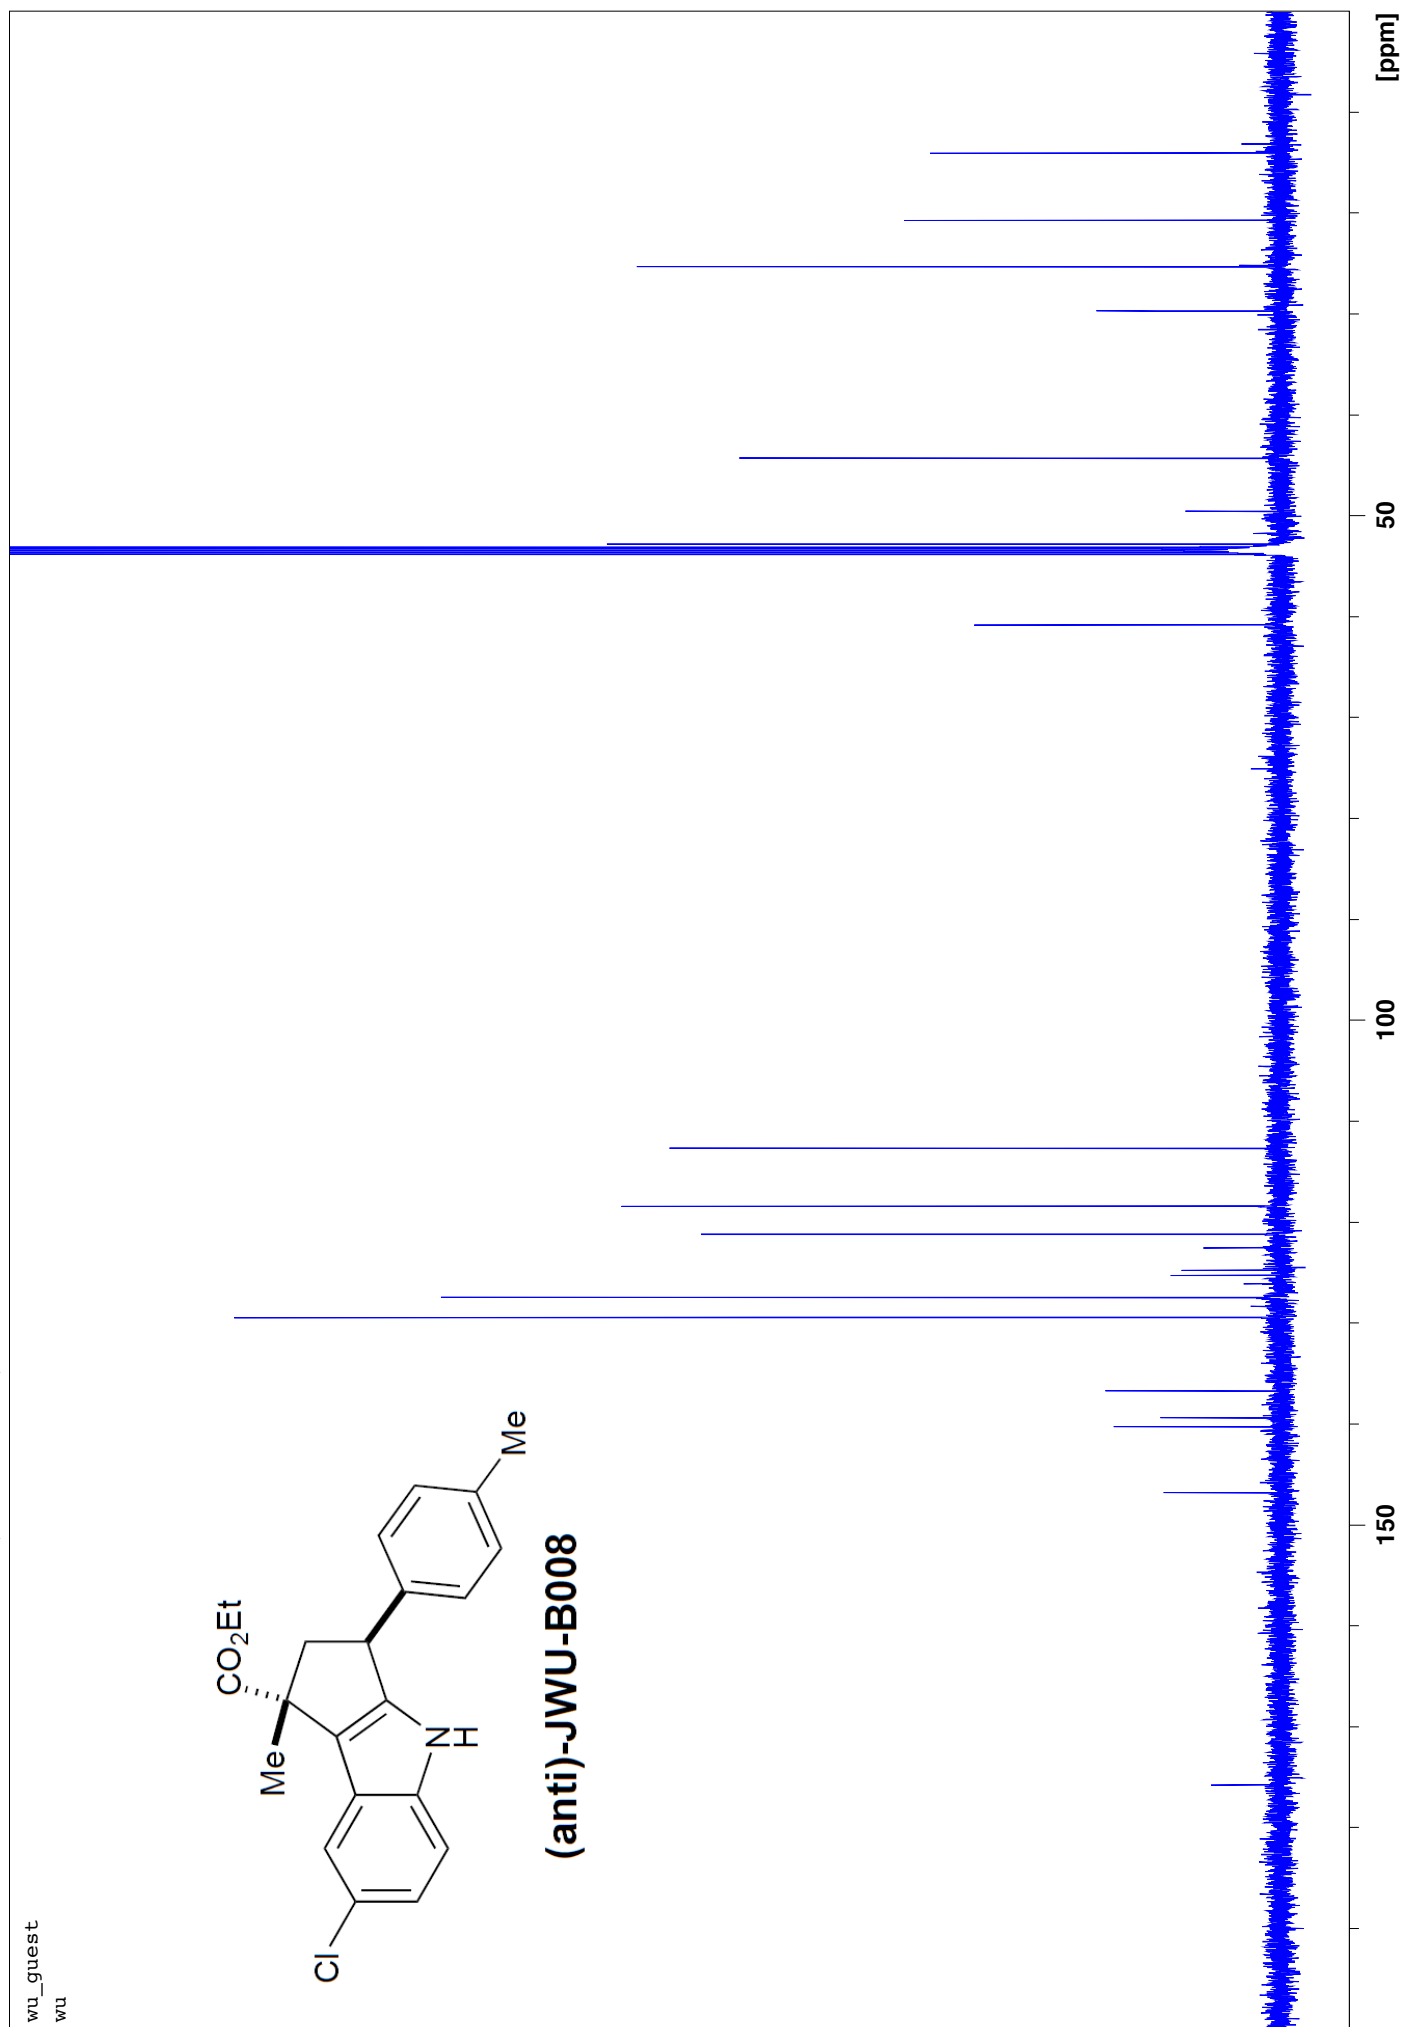



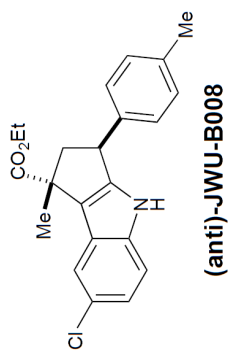

-N3-P30-TT22-RR 1 1 "I:\3+2 Products\MT-N3-P30-TT20-4-5"

HMQC

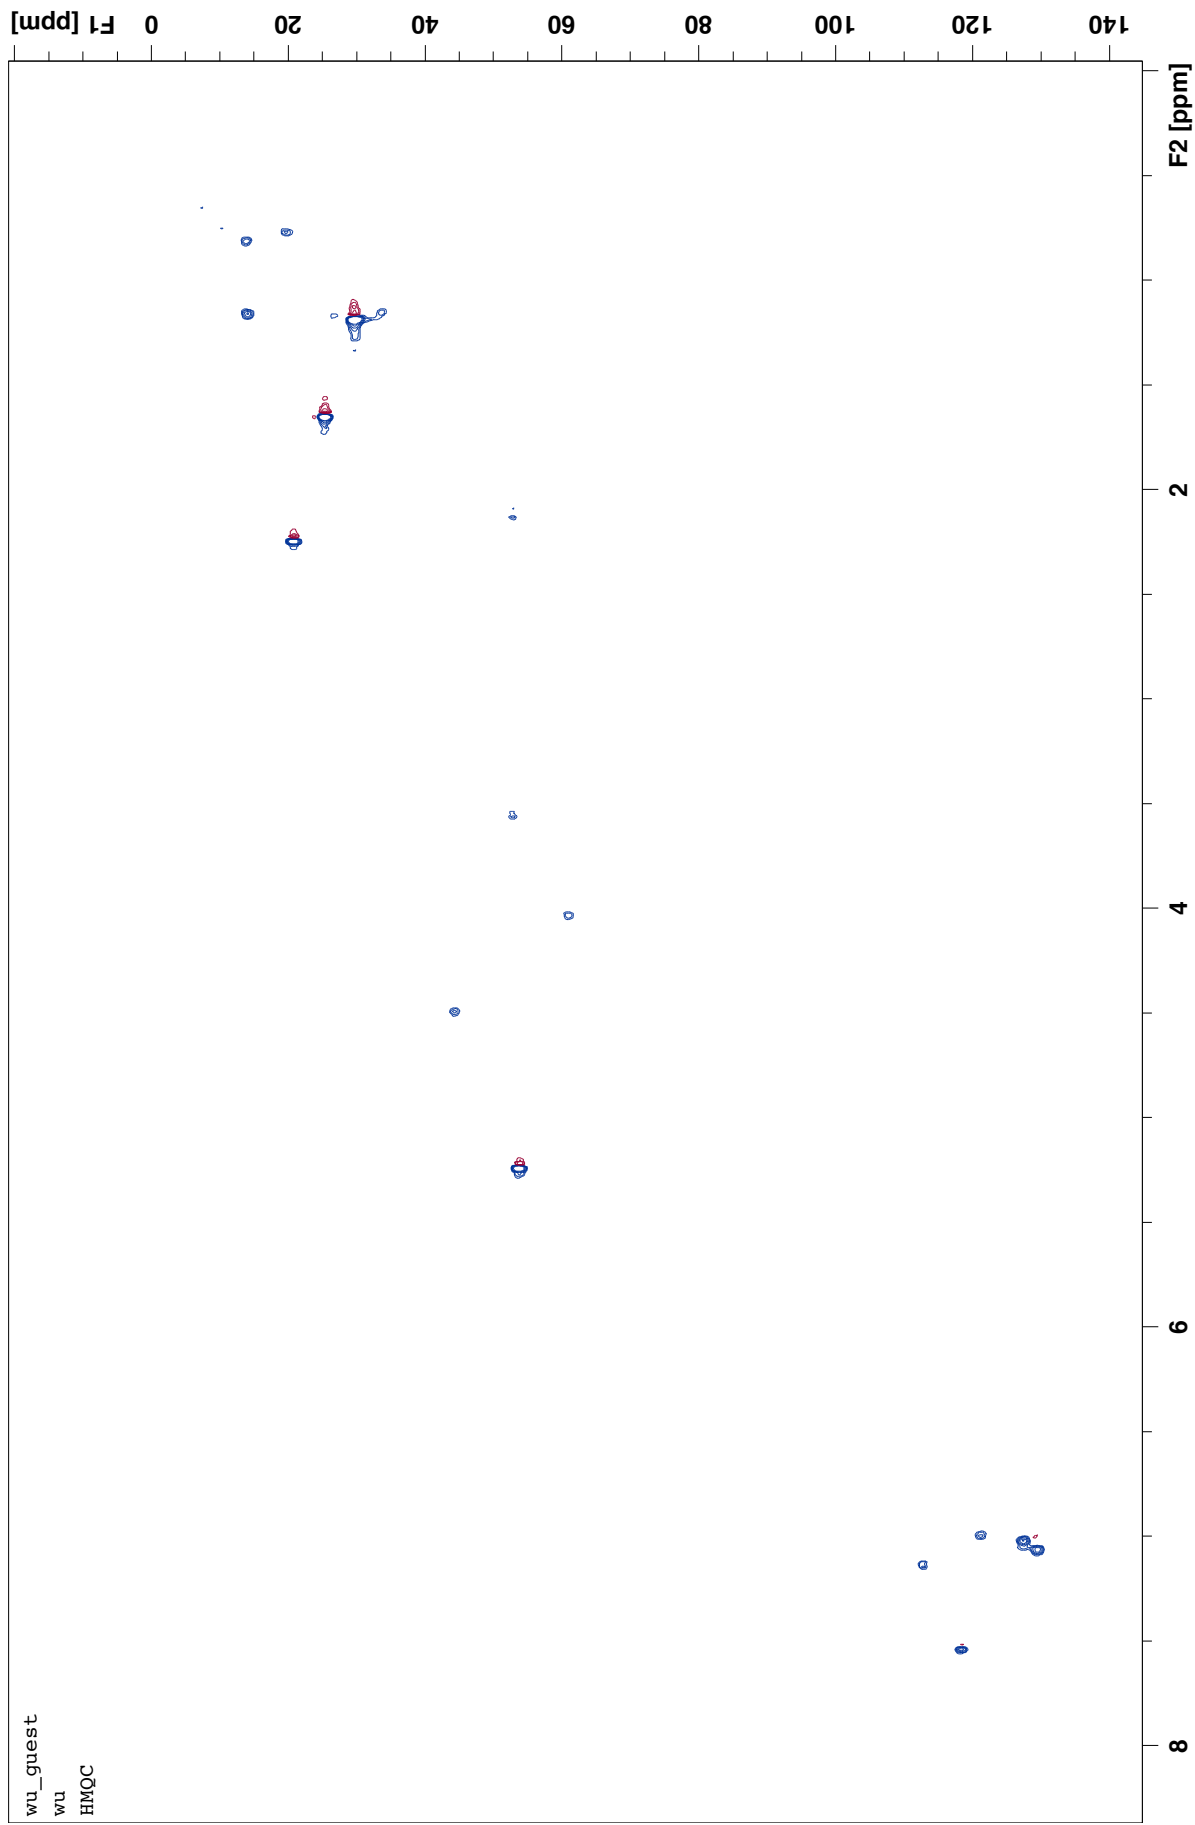

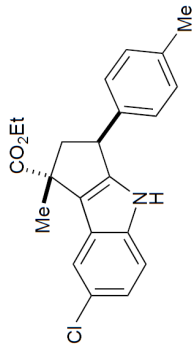

(anti)-JWU-B008

!-N3-P30-TT22-RR 12 1 "I:\3+2 Products\MT-N3-P30-TT20-4-5"

HMBC

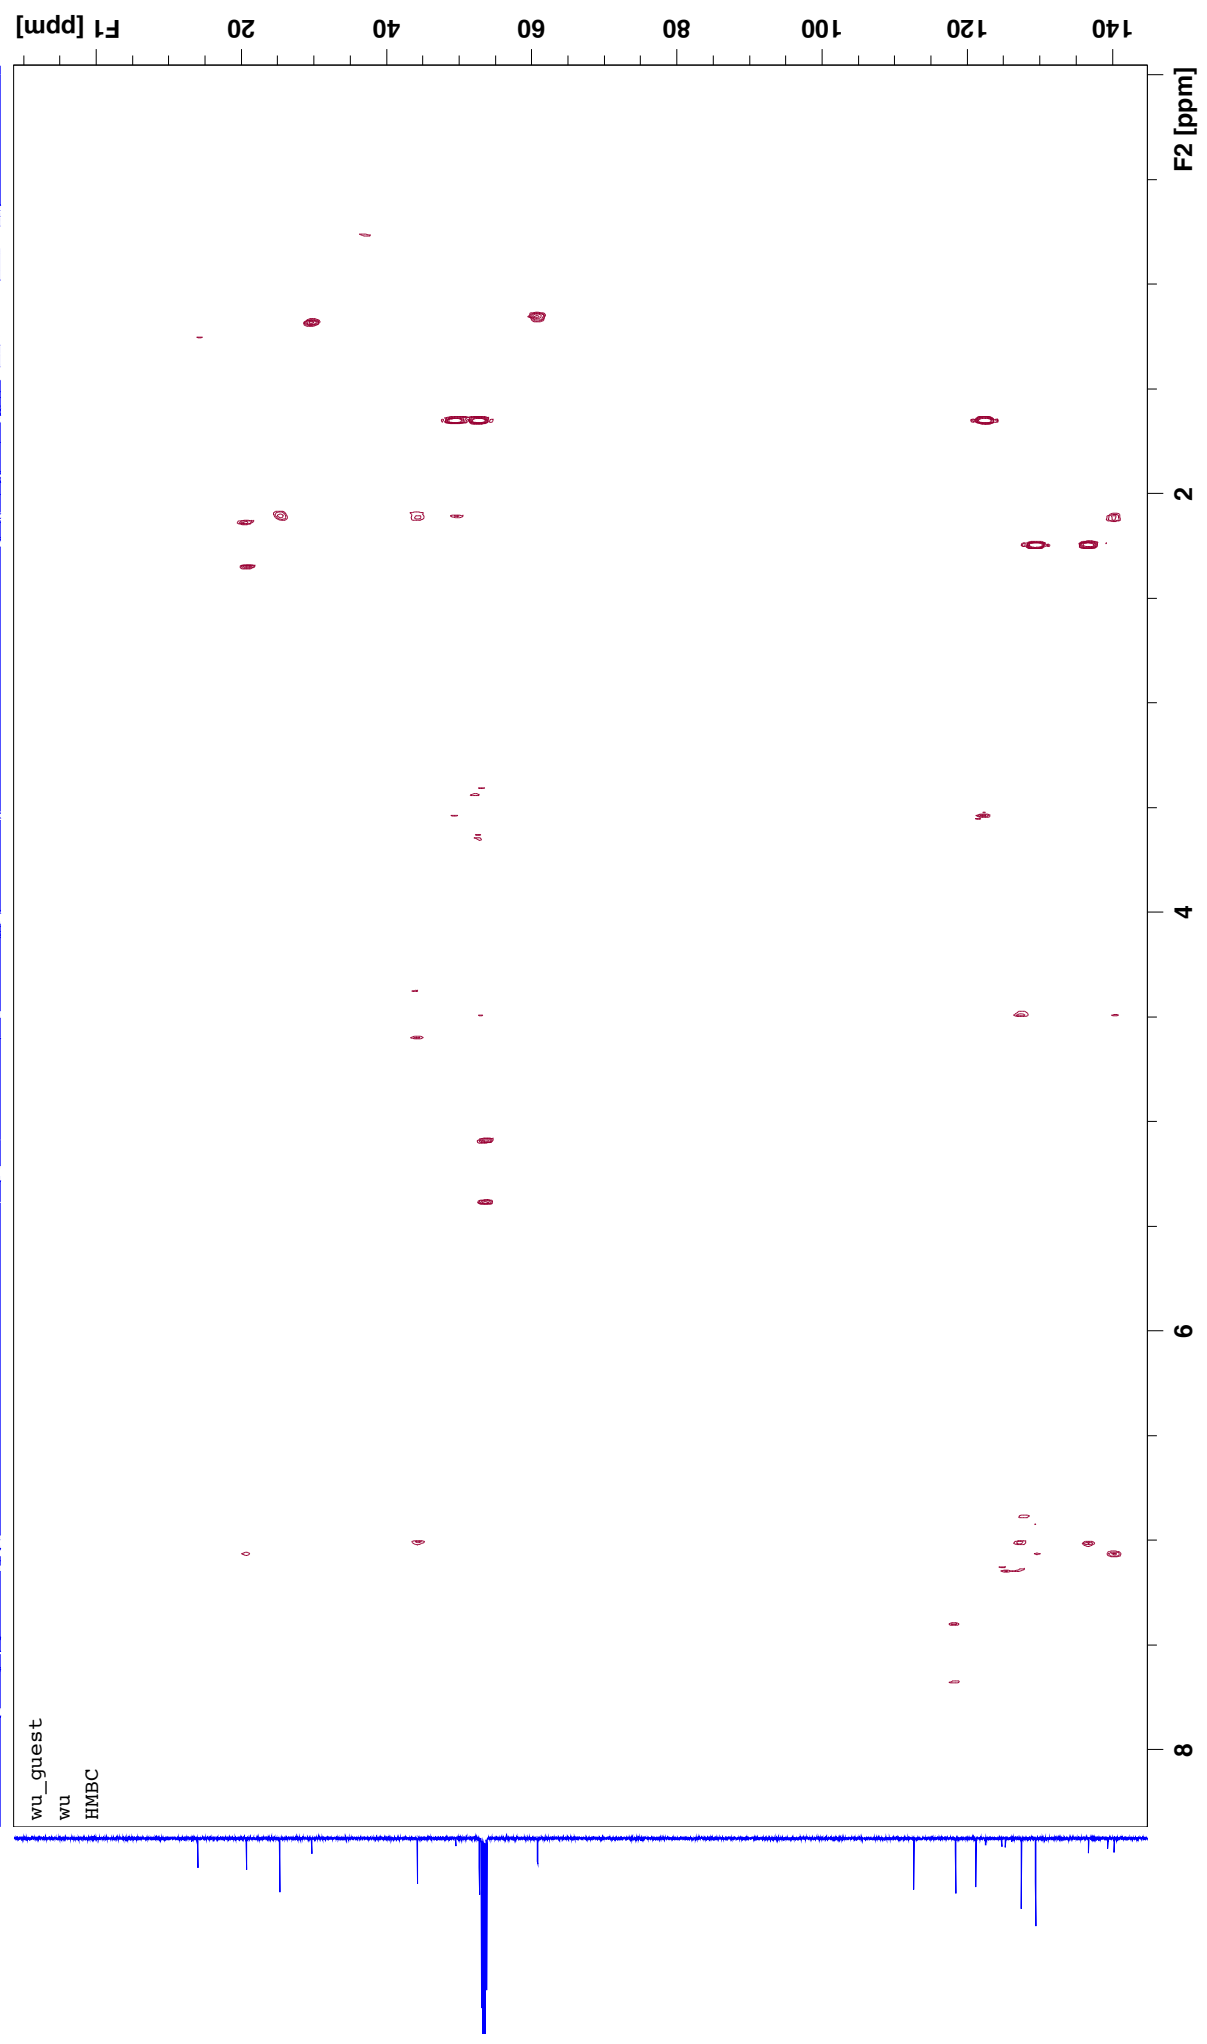

wu\_guest  
wu  
HMBC

S50

-N3-P30-TT22-RR 13 1 "I:\3+2 Products\MT-N3-P30-TT20-4-5"

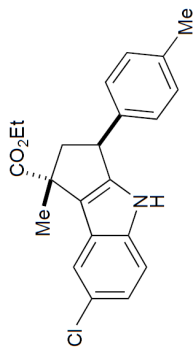

COSY

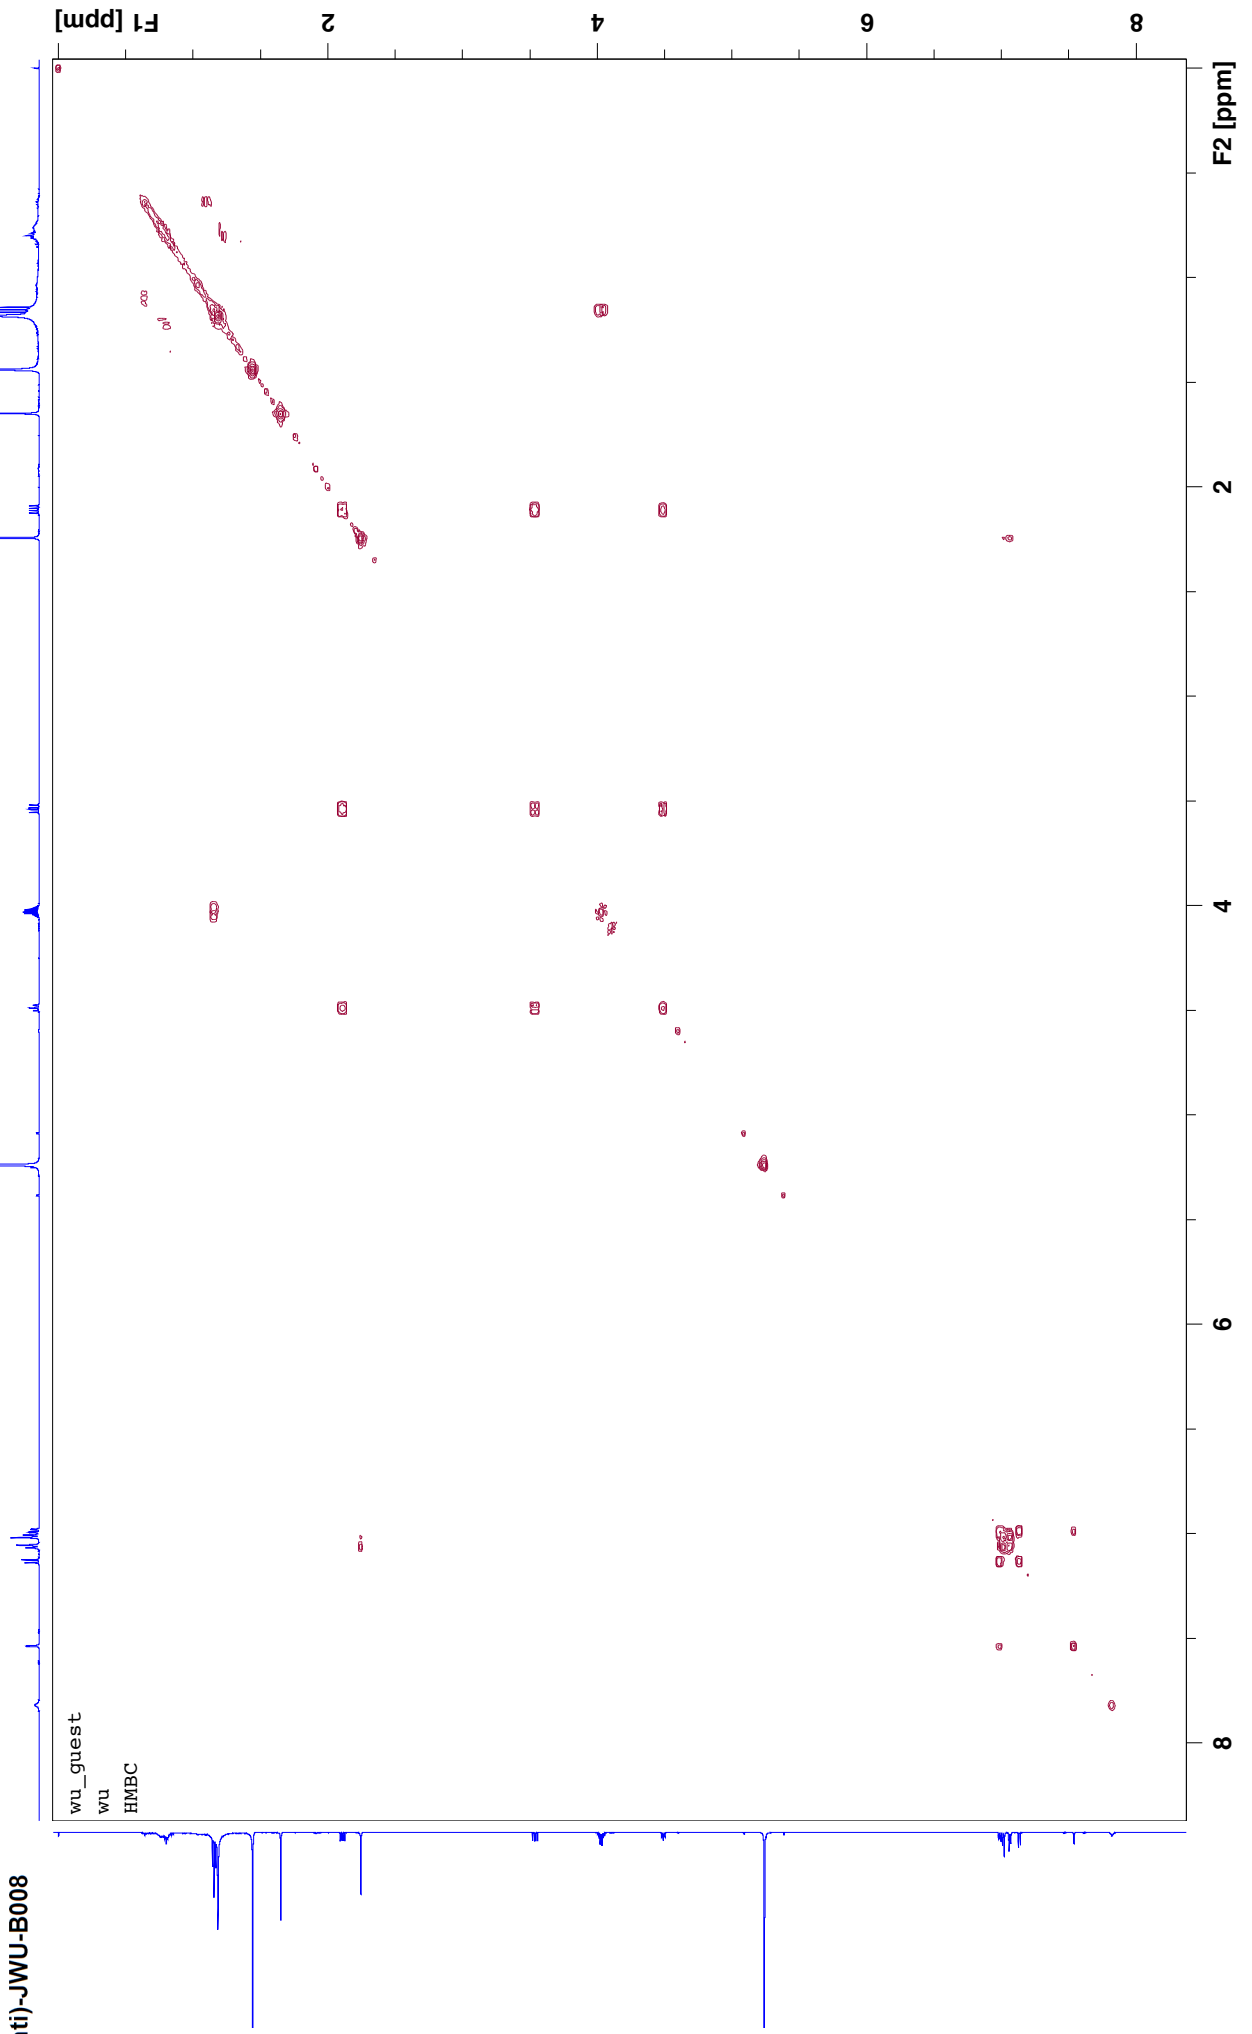

-N3-P30-TT22-RR 14 1 "I:\3+2 Products\MT-N3-P30-TT20-4-5"

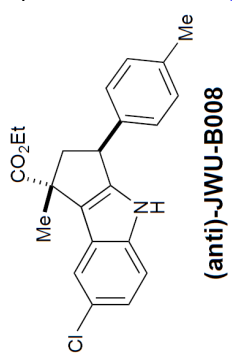

NOESY

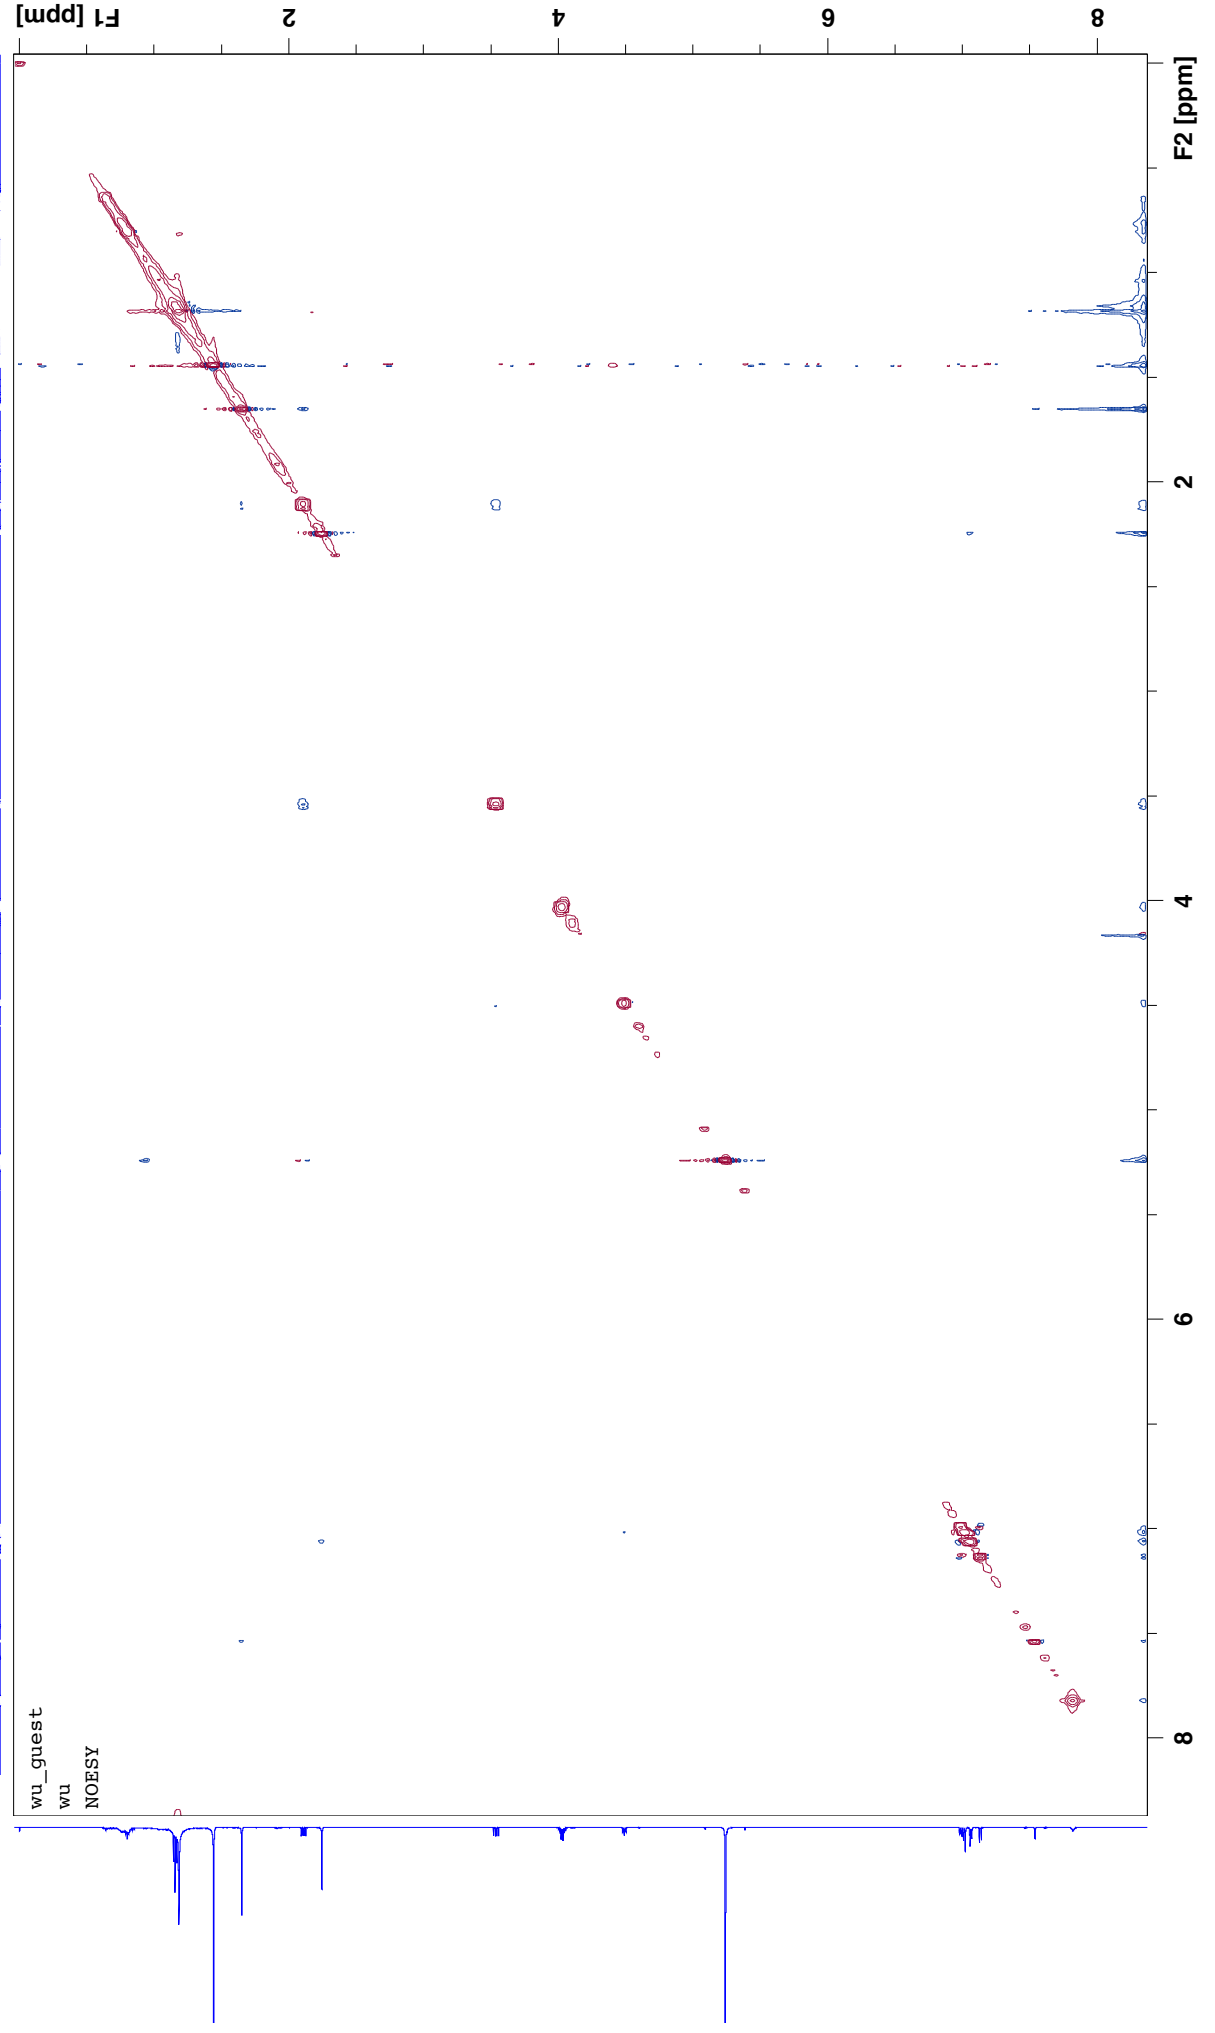

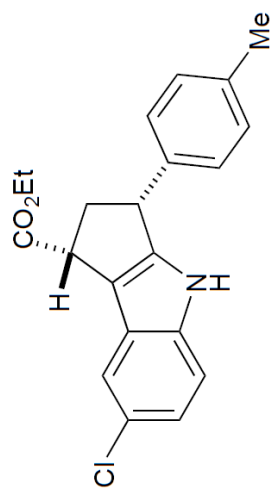

(syn)-JWU-B009

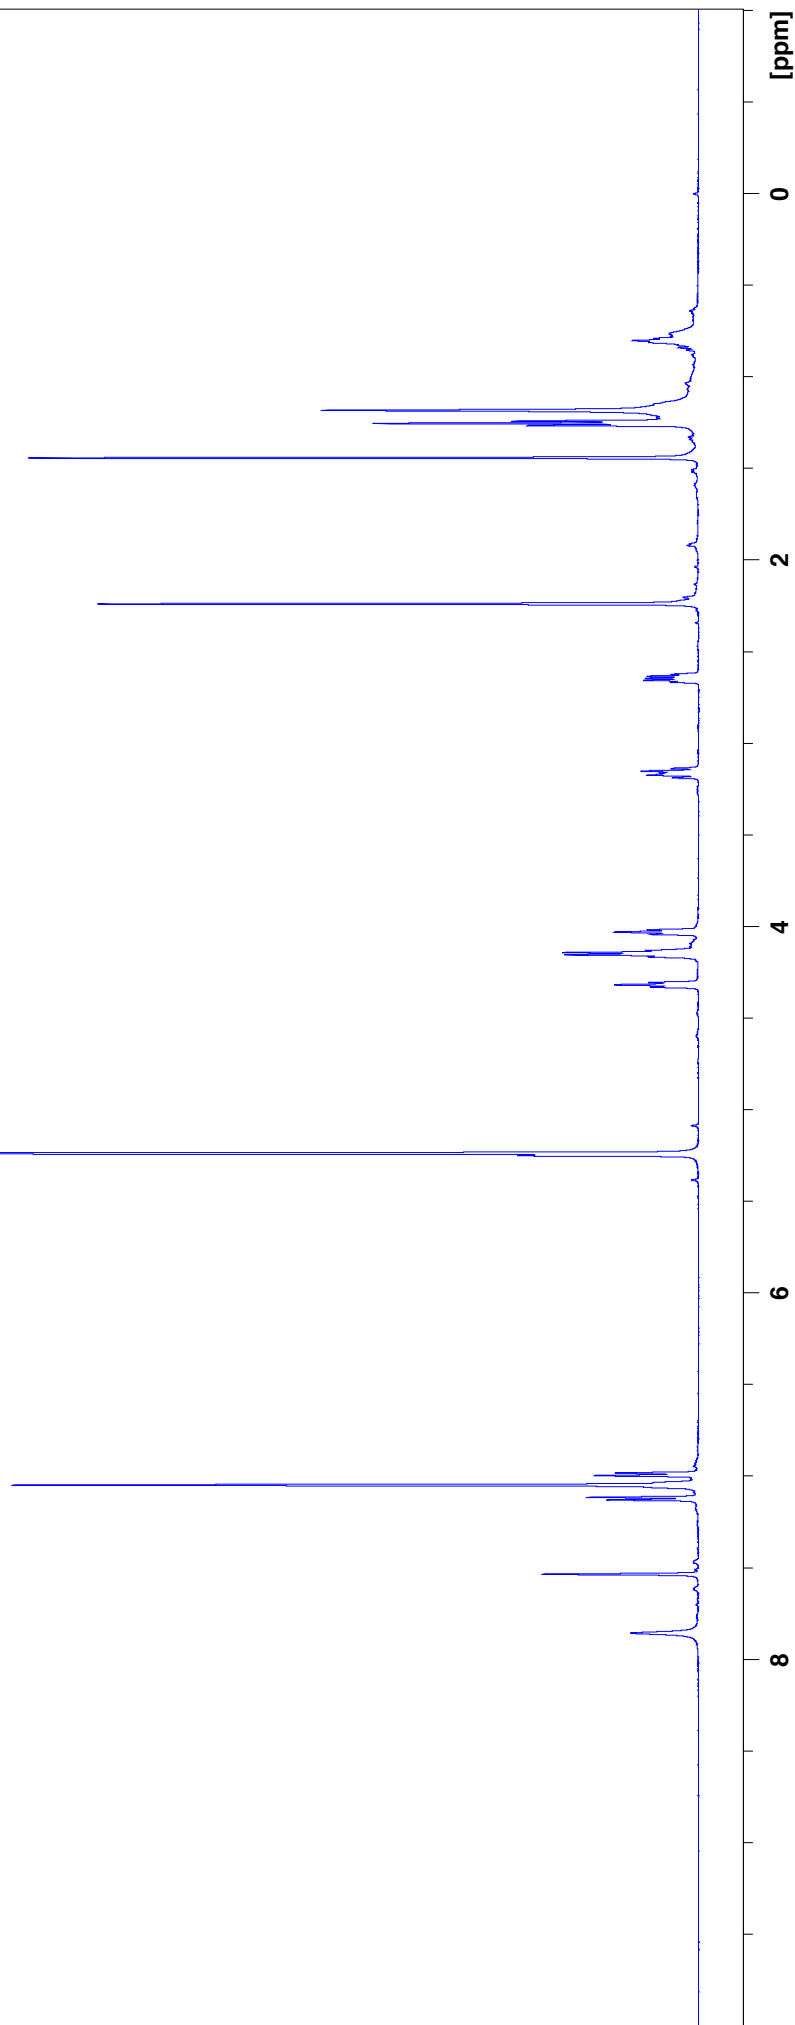

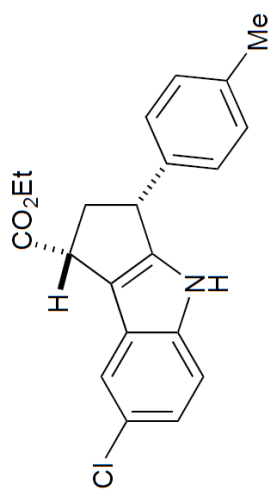

(syn)-JWU-B009

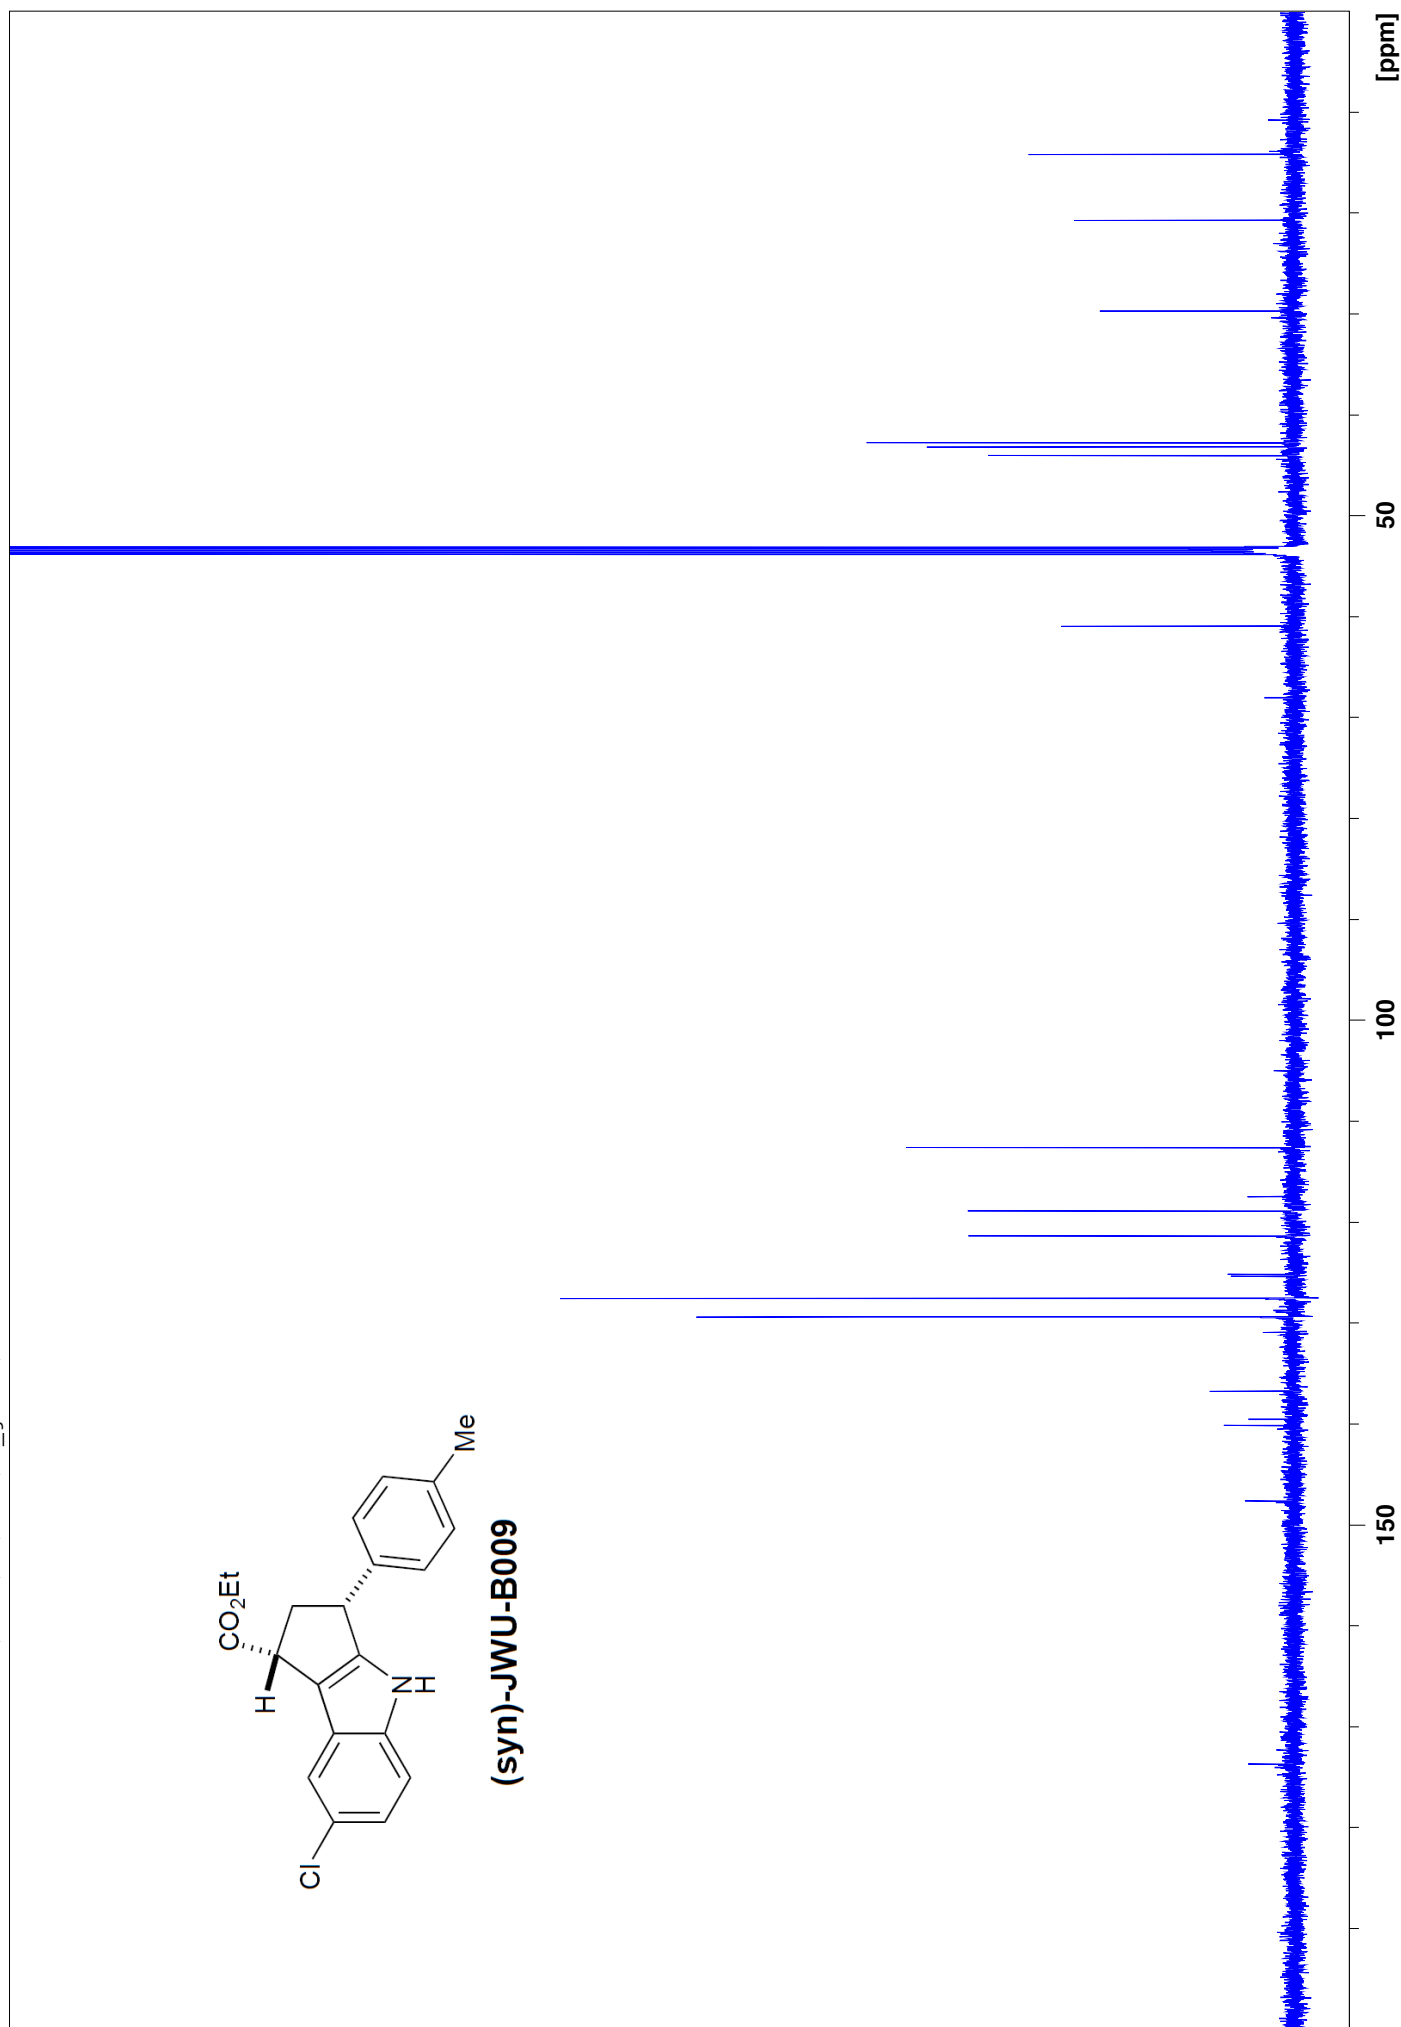

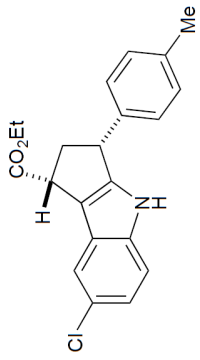

.N3-P48-IT21-5-6 1.1 N:\b600\wu\data\wu\_guest\mmr

HMQC

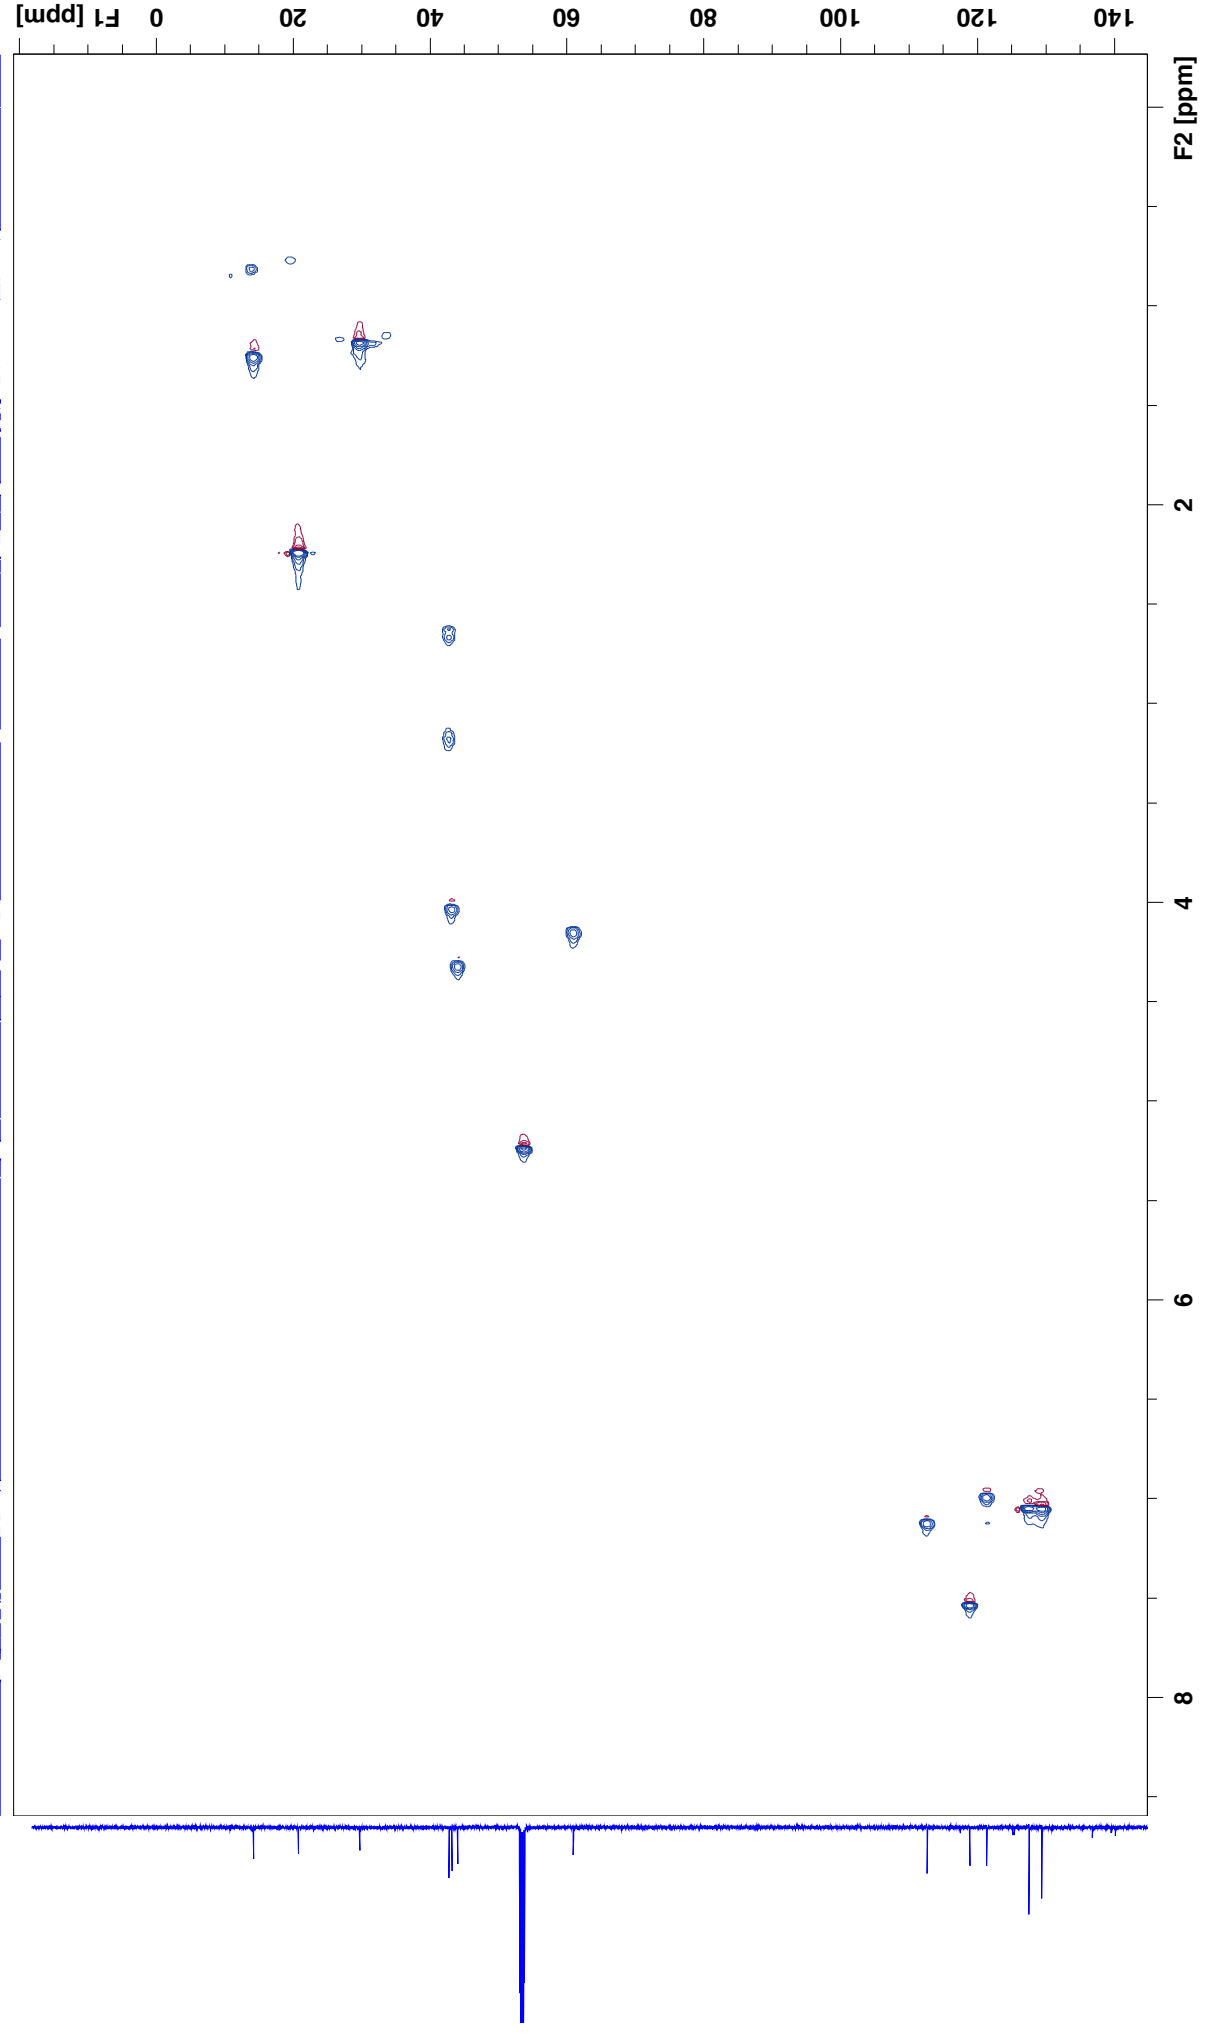

S55

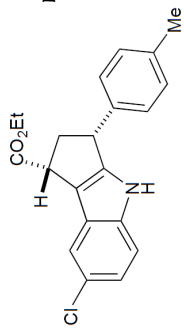

(syn)-JWU-B009

Mt-N3-P48-IT21-5-6 13 1 N:\b600\wu\data\wu\_guest\mmr

HMBC

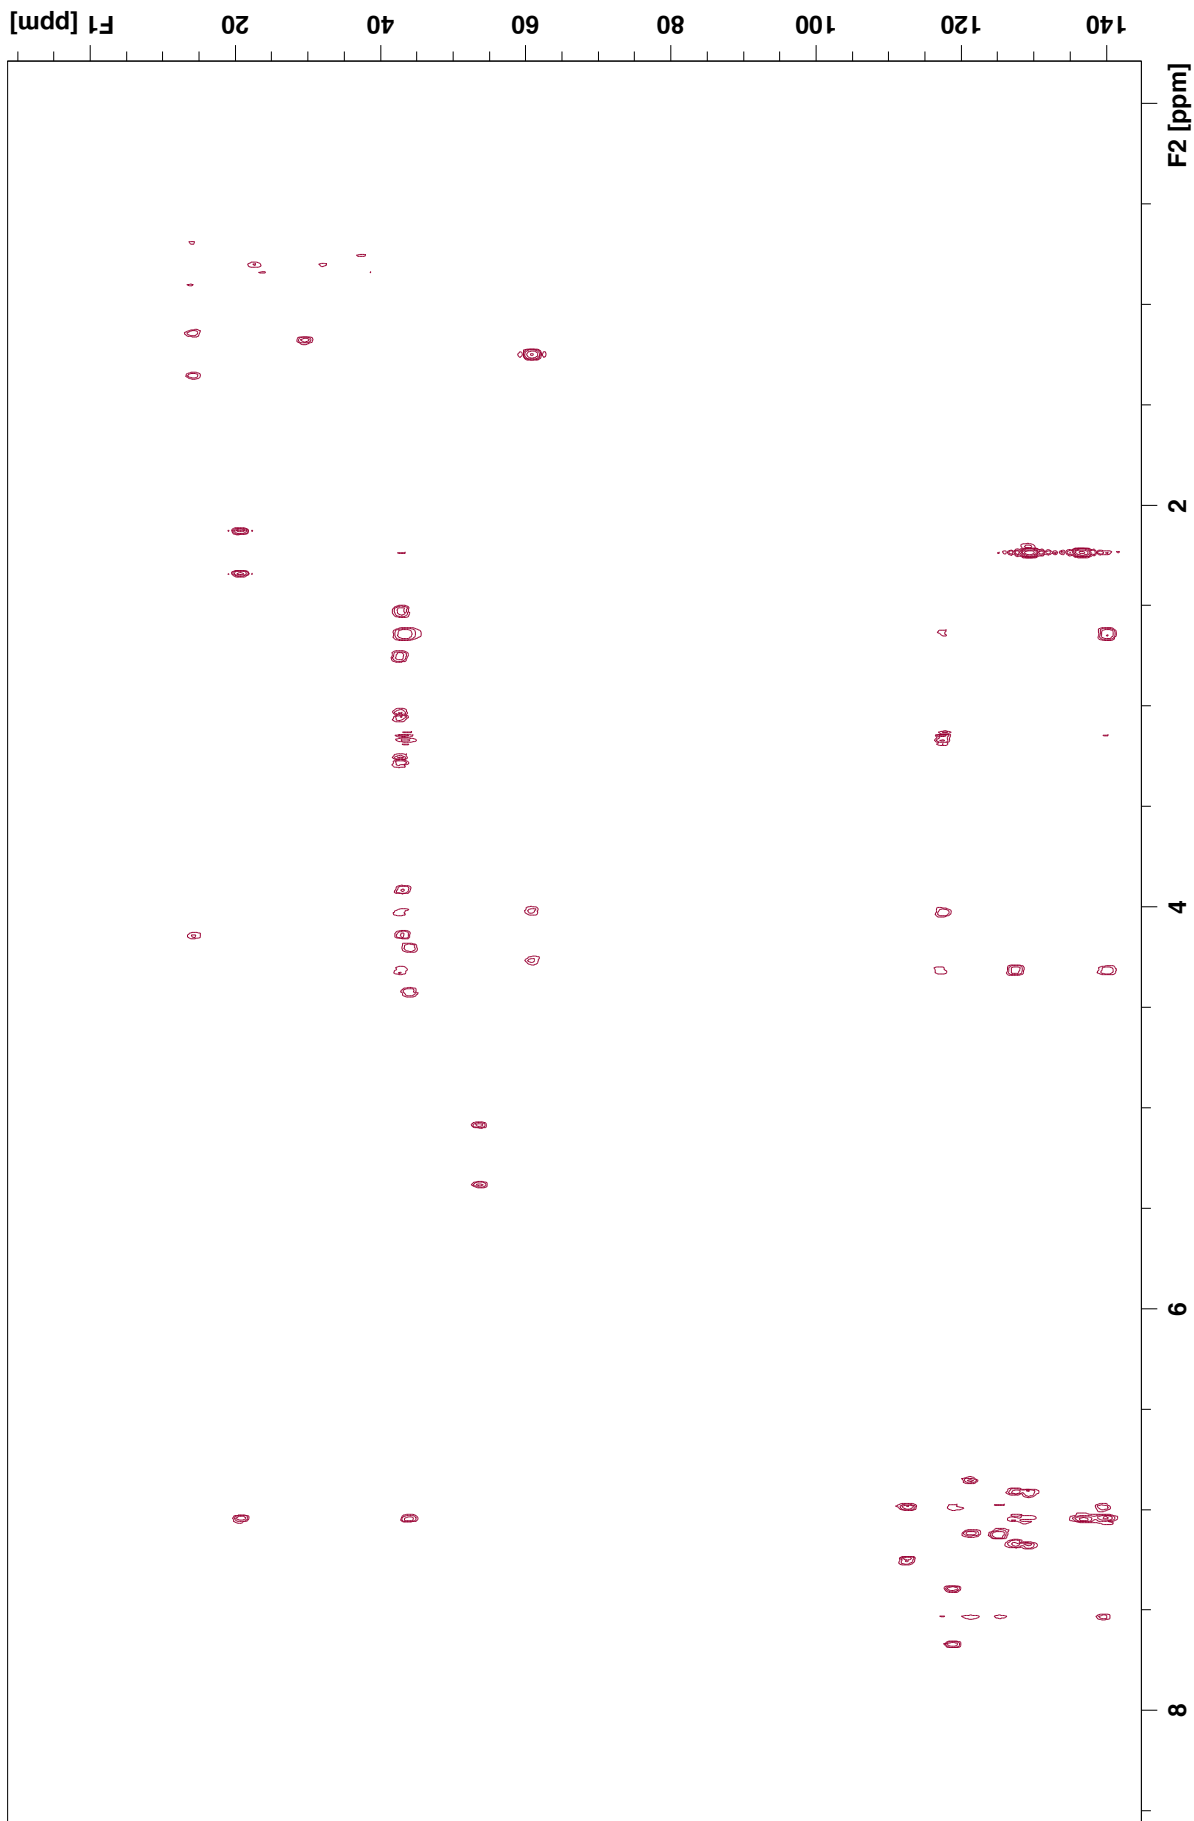



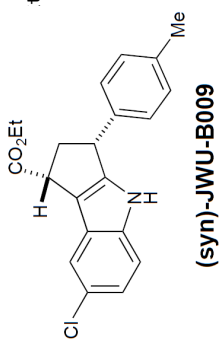

t-N3-P48-IT21-5-6 15 1 N:\b600\wu\data\wu\_guest\mmr

**COSY**

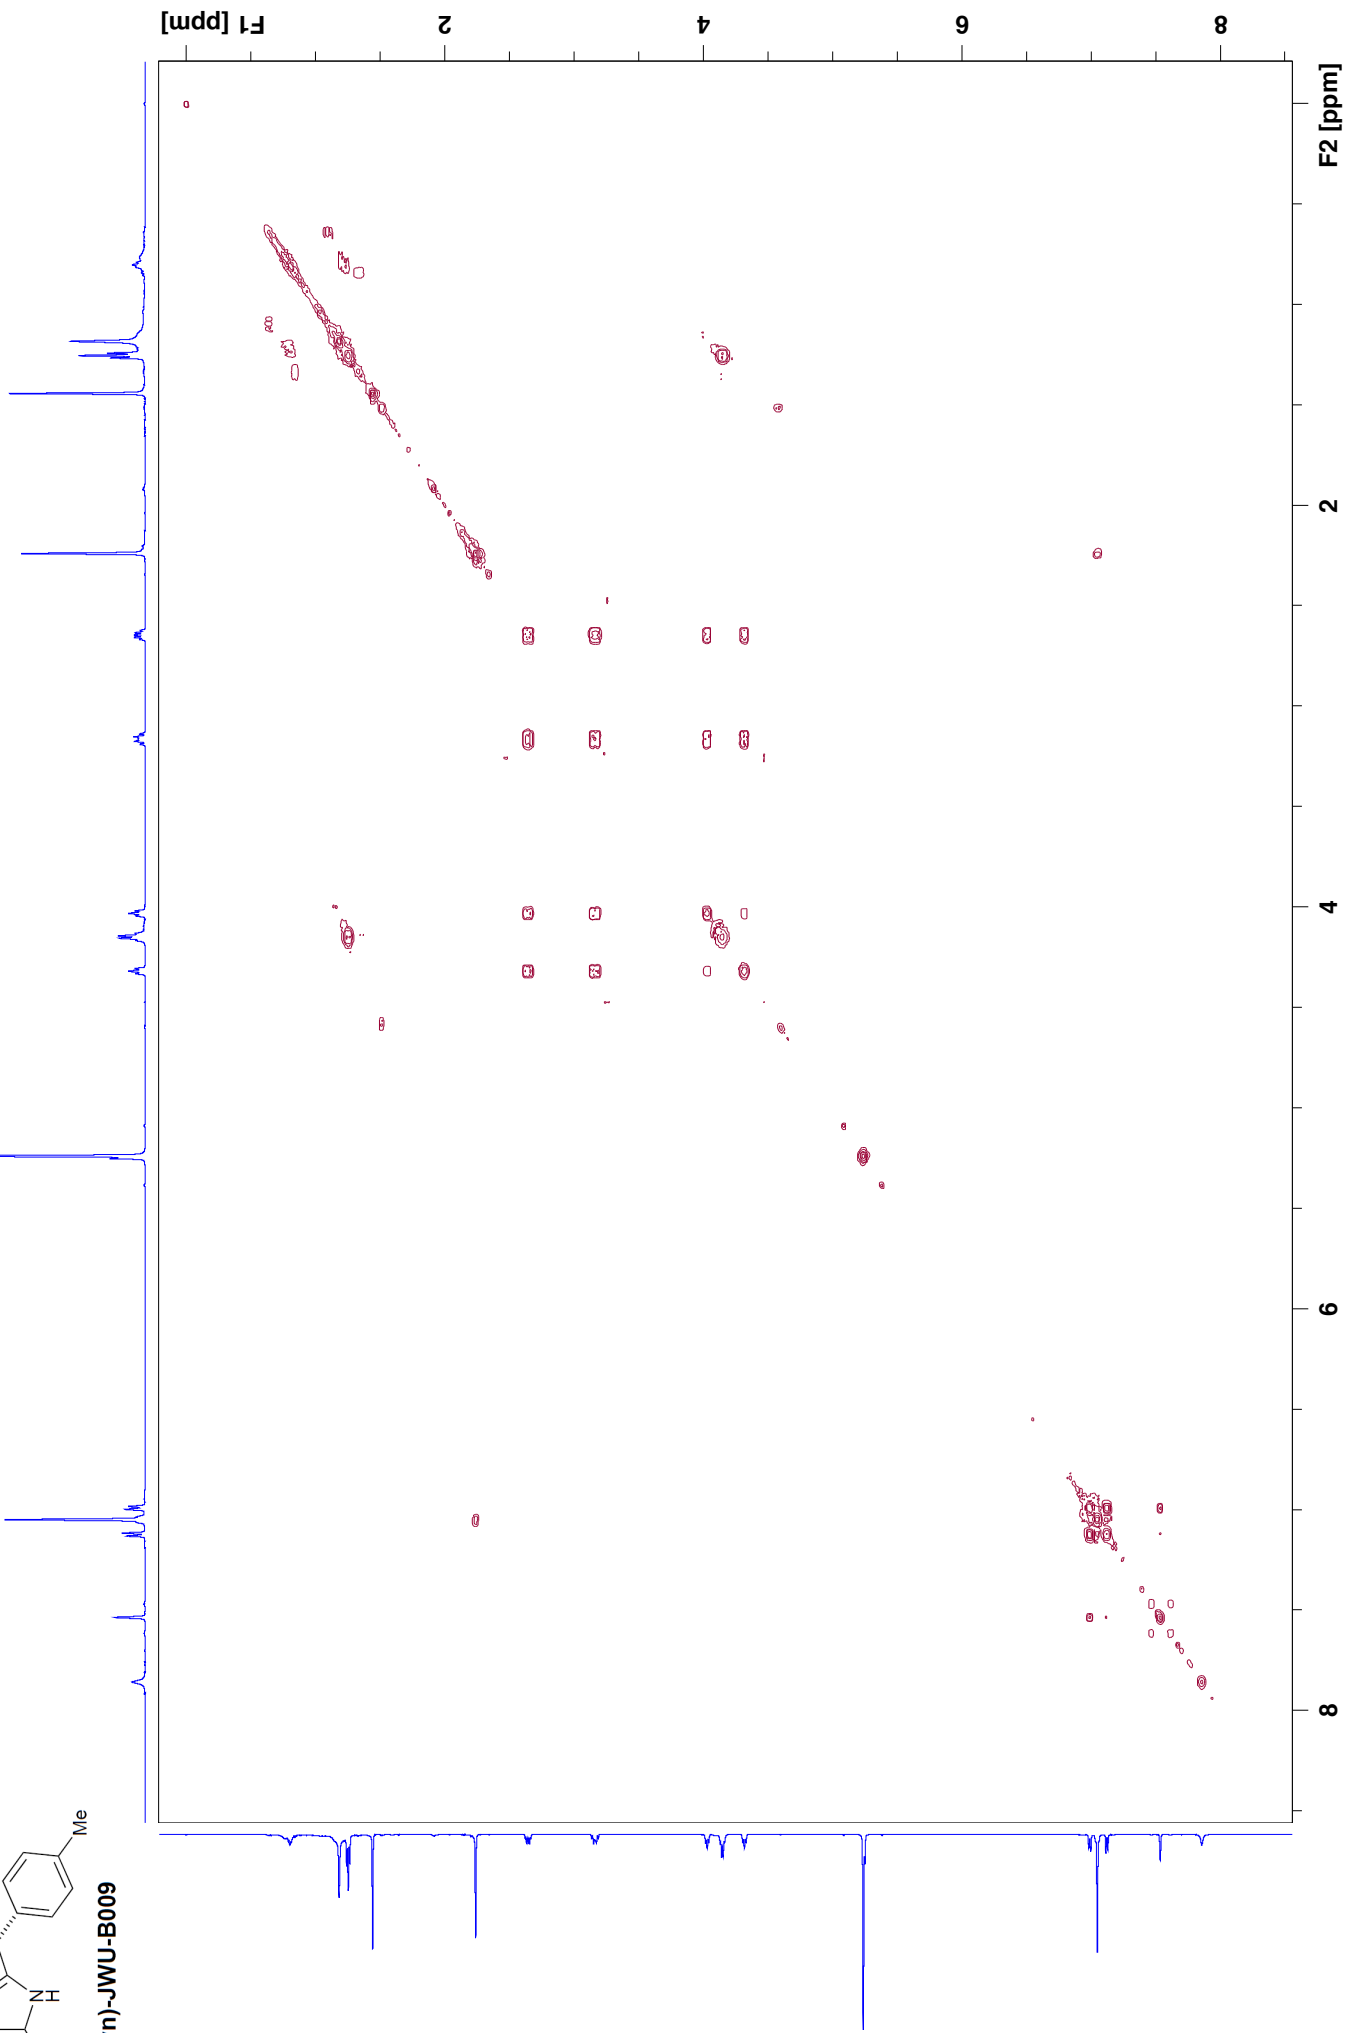

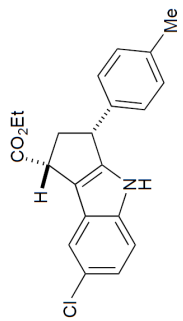

Mt-N3-P48-TR21-5-6 14 1 N:\b600\wu\data\wu\_guest\mmr

# NOESY

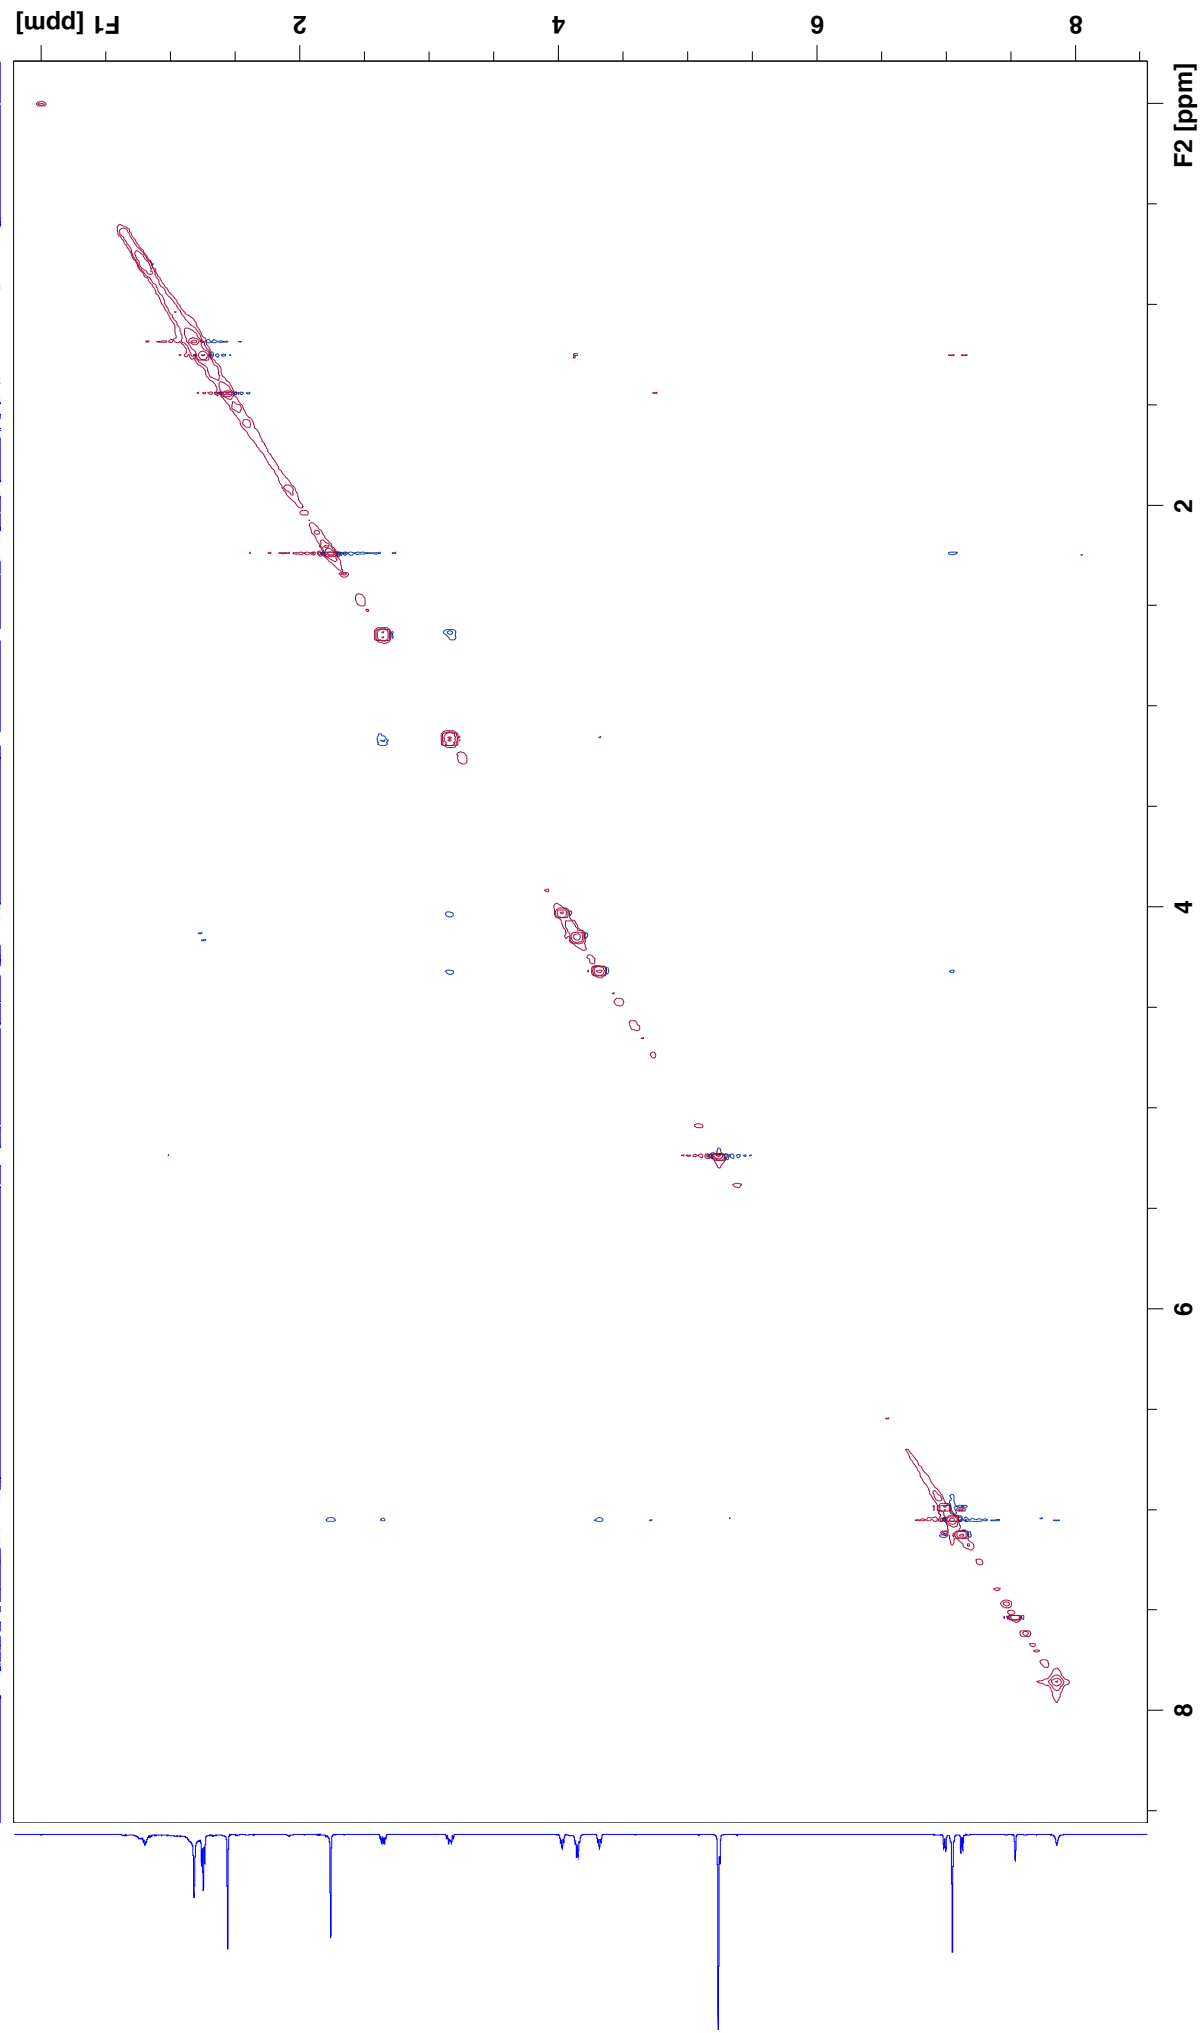

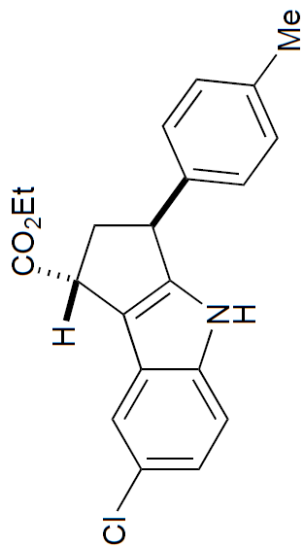

(anti)-JWU-B010

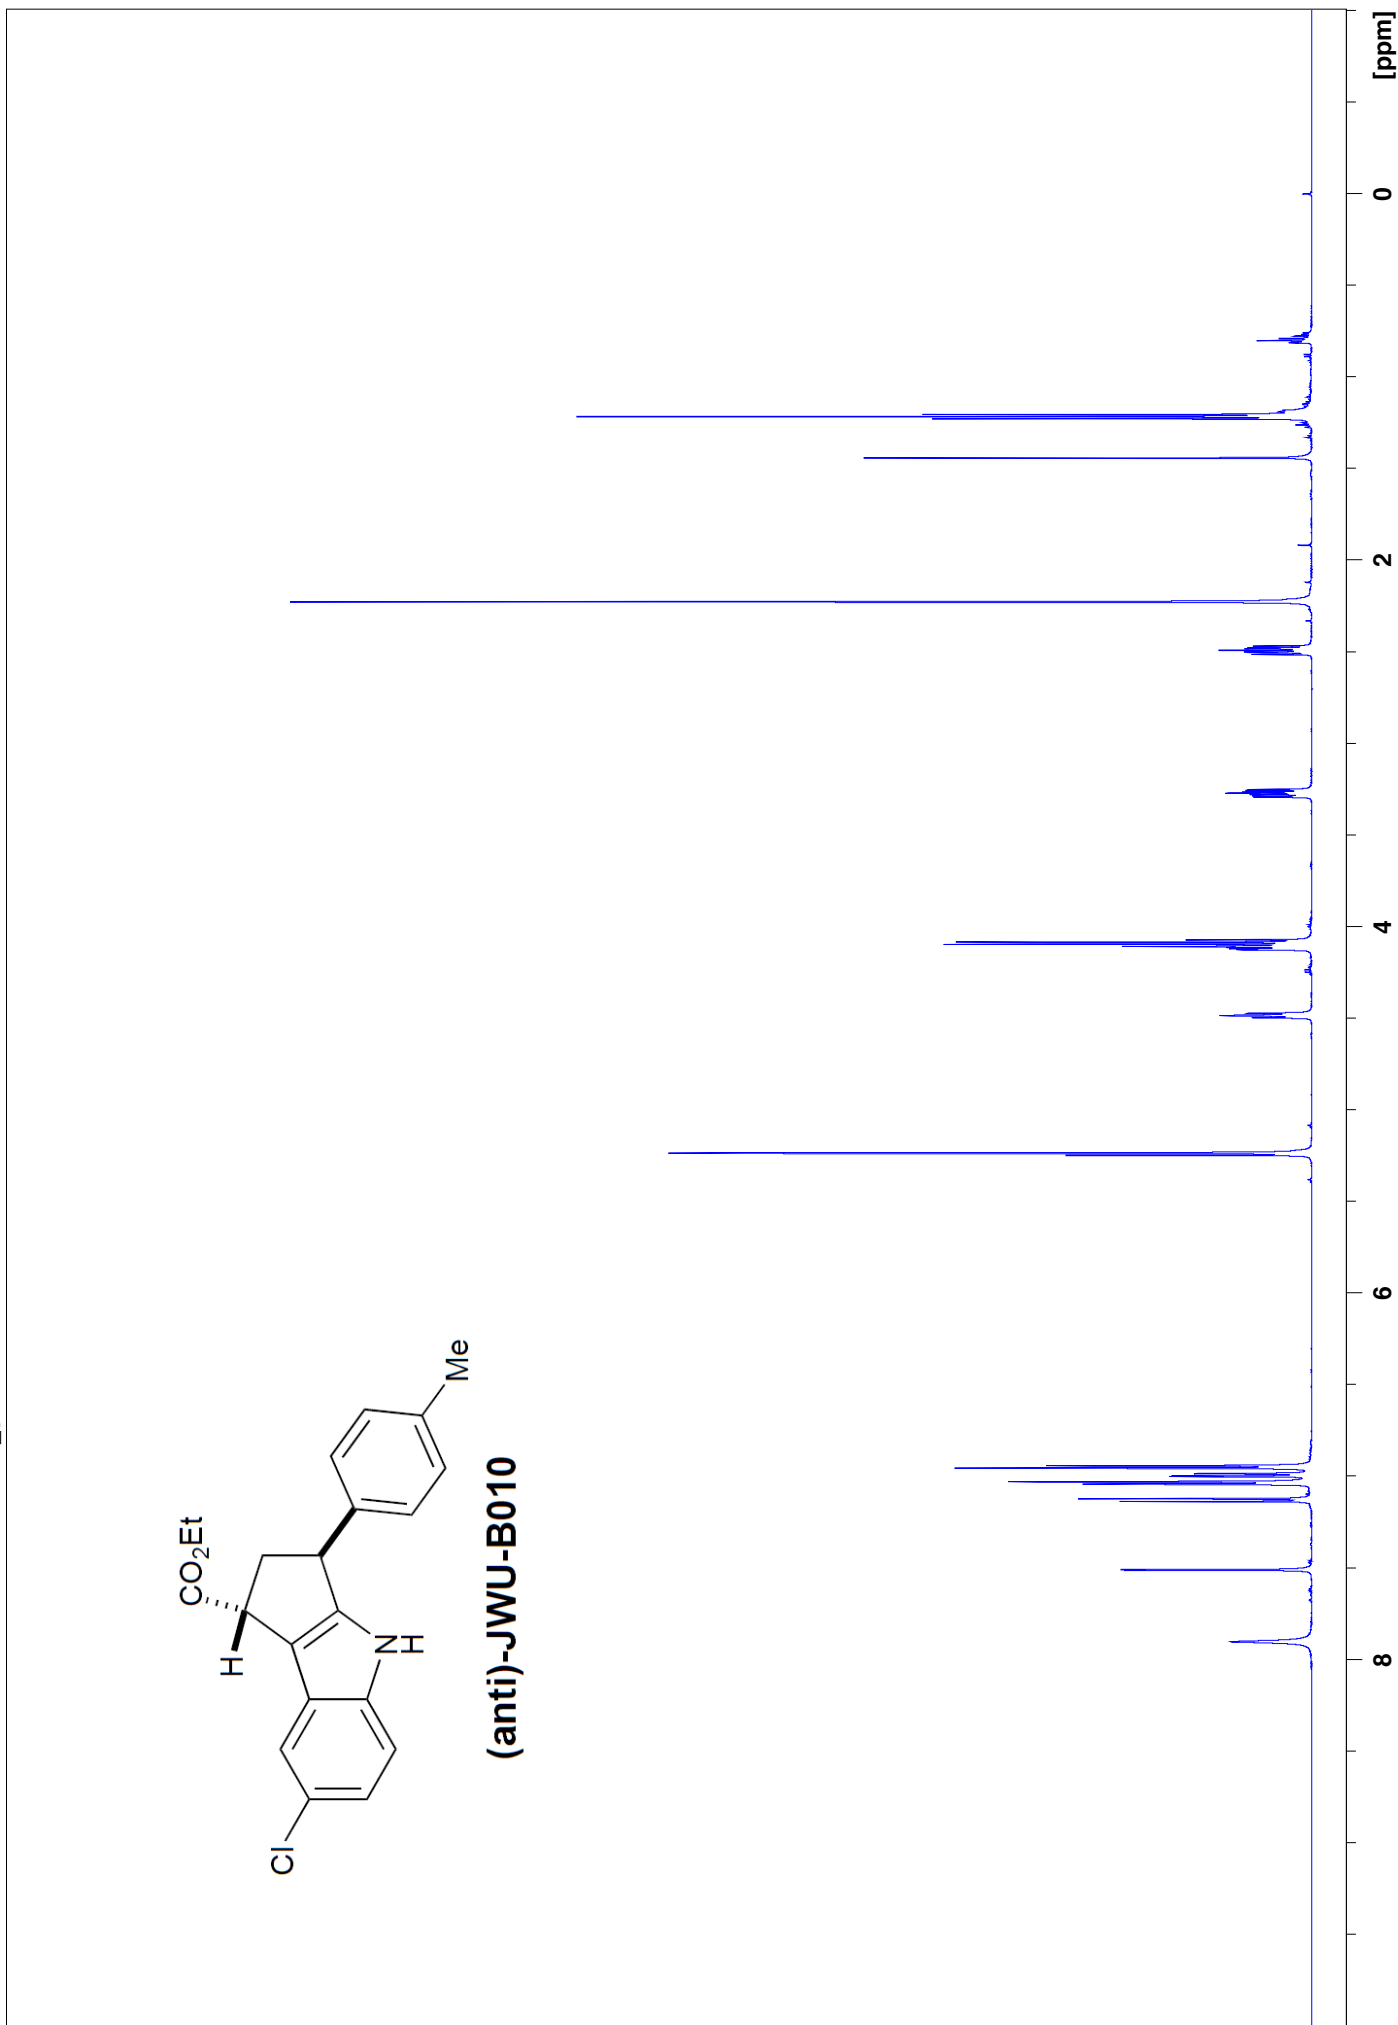

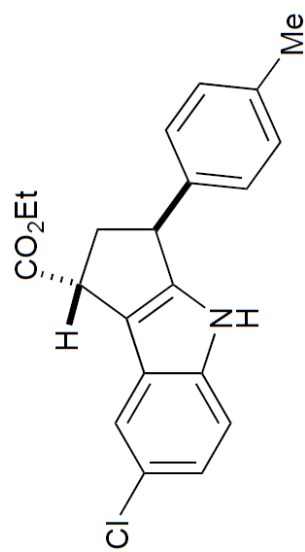

(anti)-JWU-B010

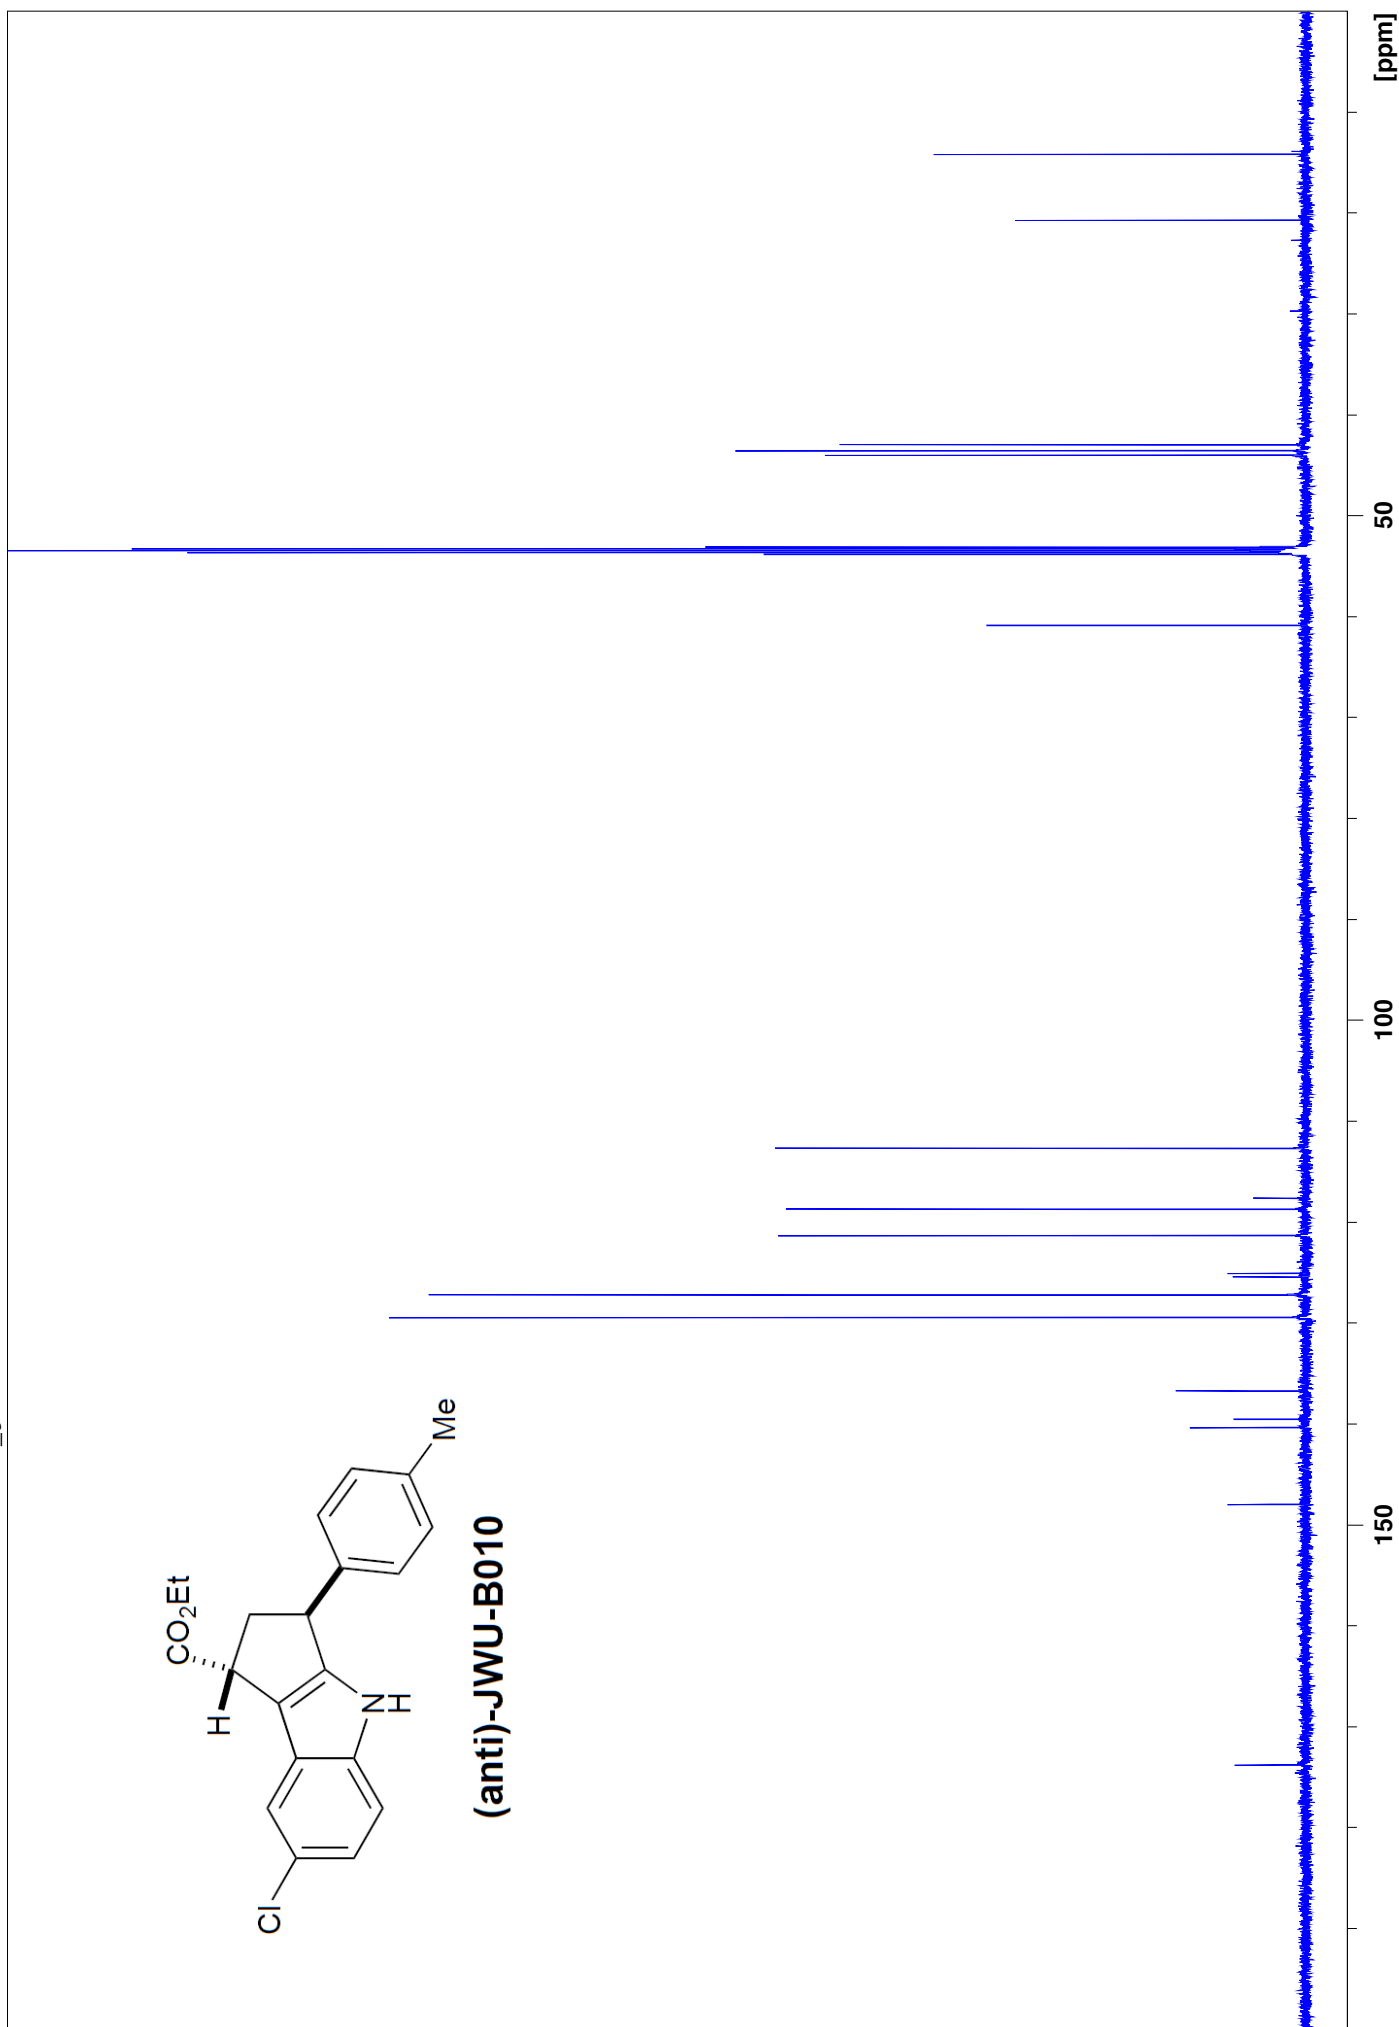

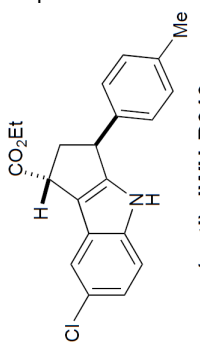

-N3-P48-TT23-3-4 21 1 N:\b600\wu\data\wu\_guest\mmr

# HMQC

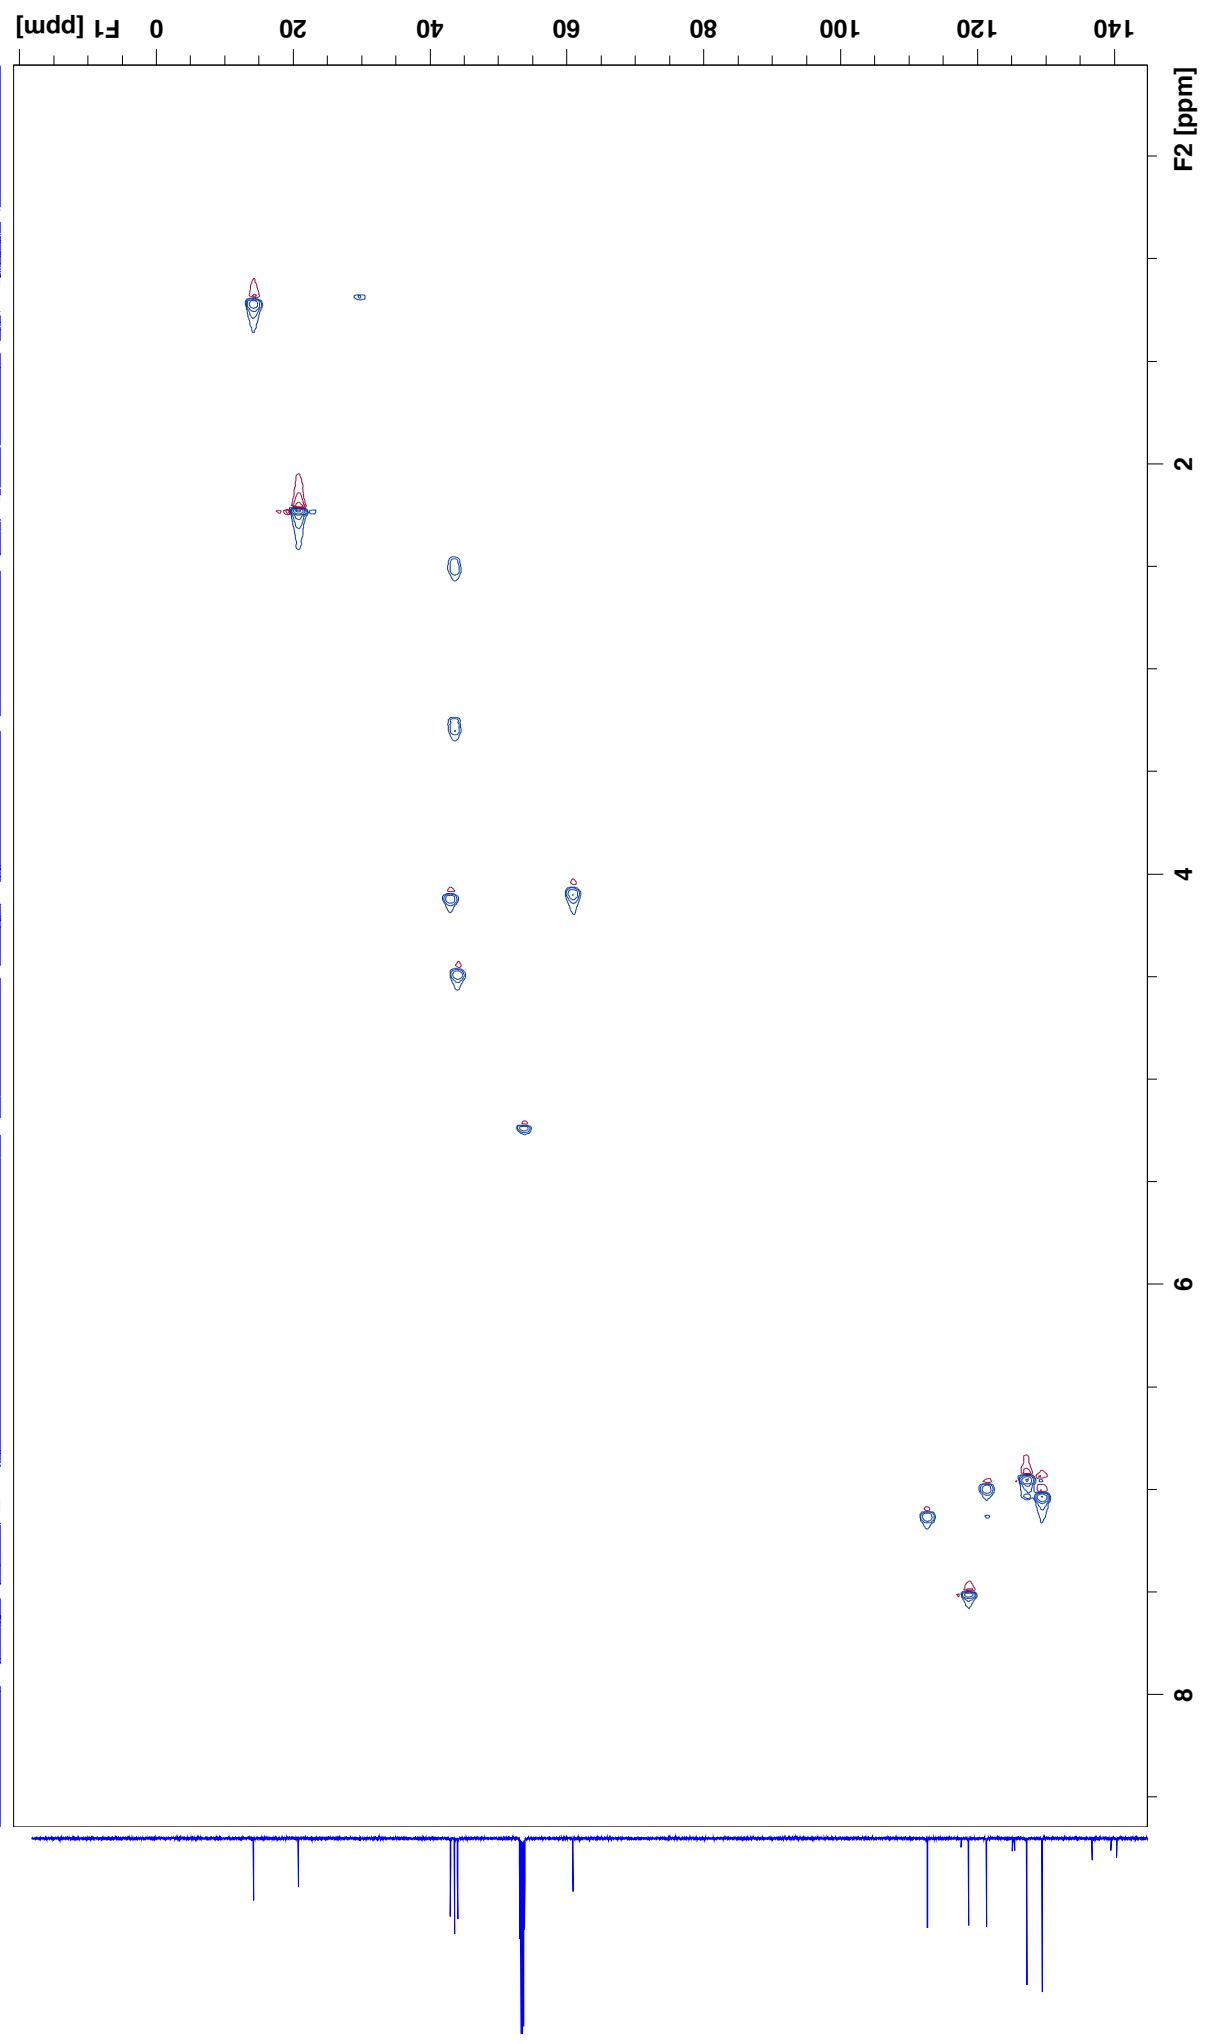

4T-N3-P48-TT23-3-4 22 1 N:\b600\wu\data\wu\_guest\mmr

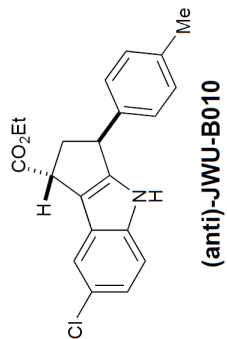

HMBC

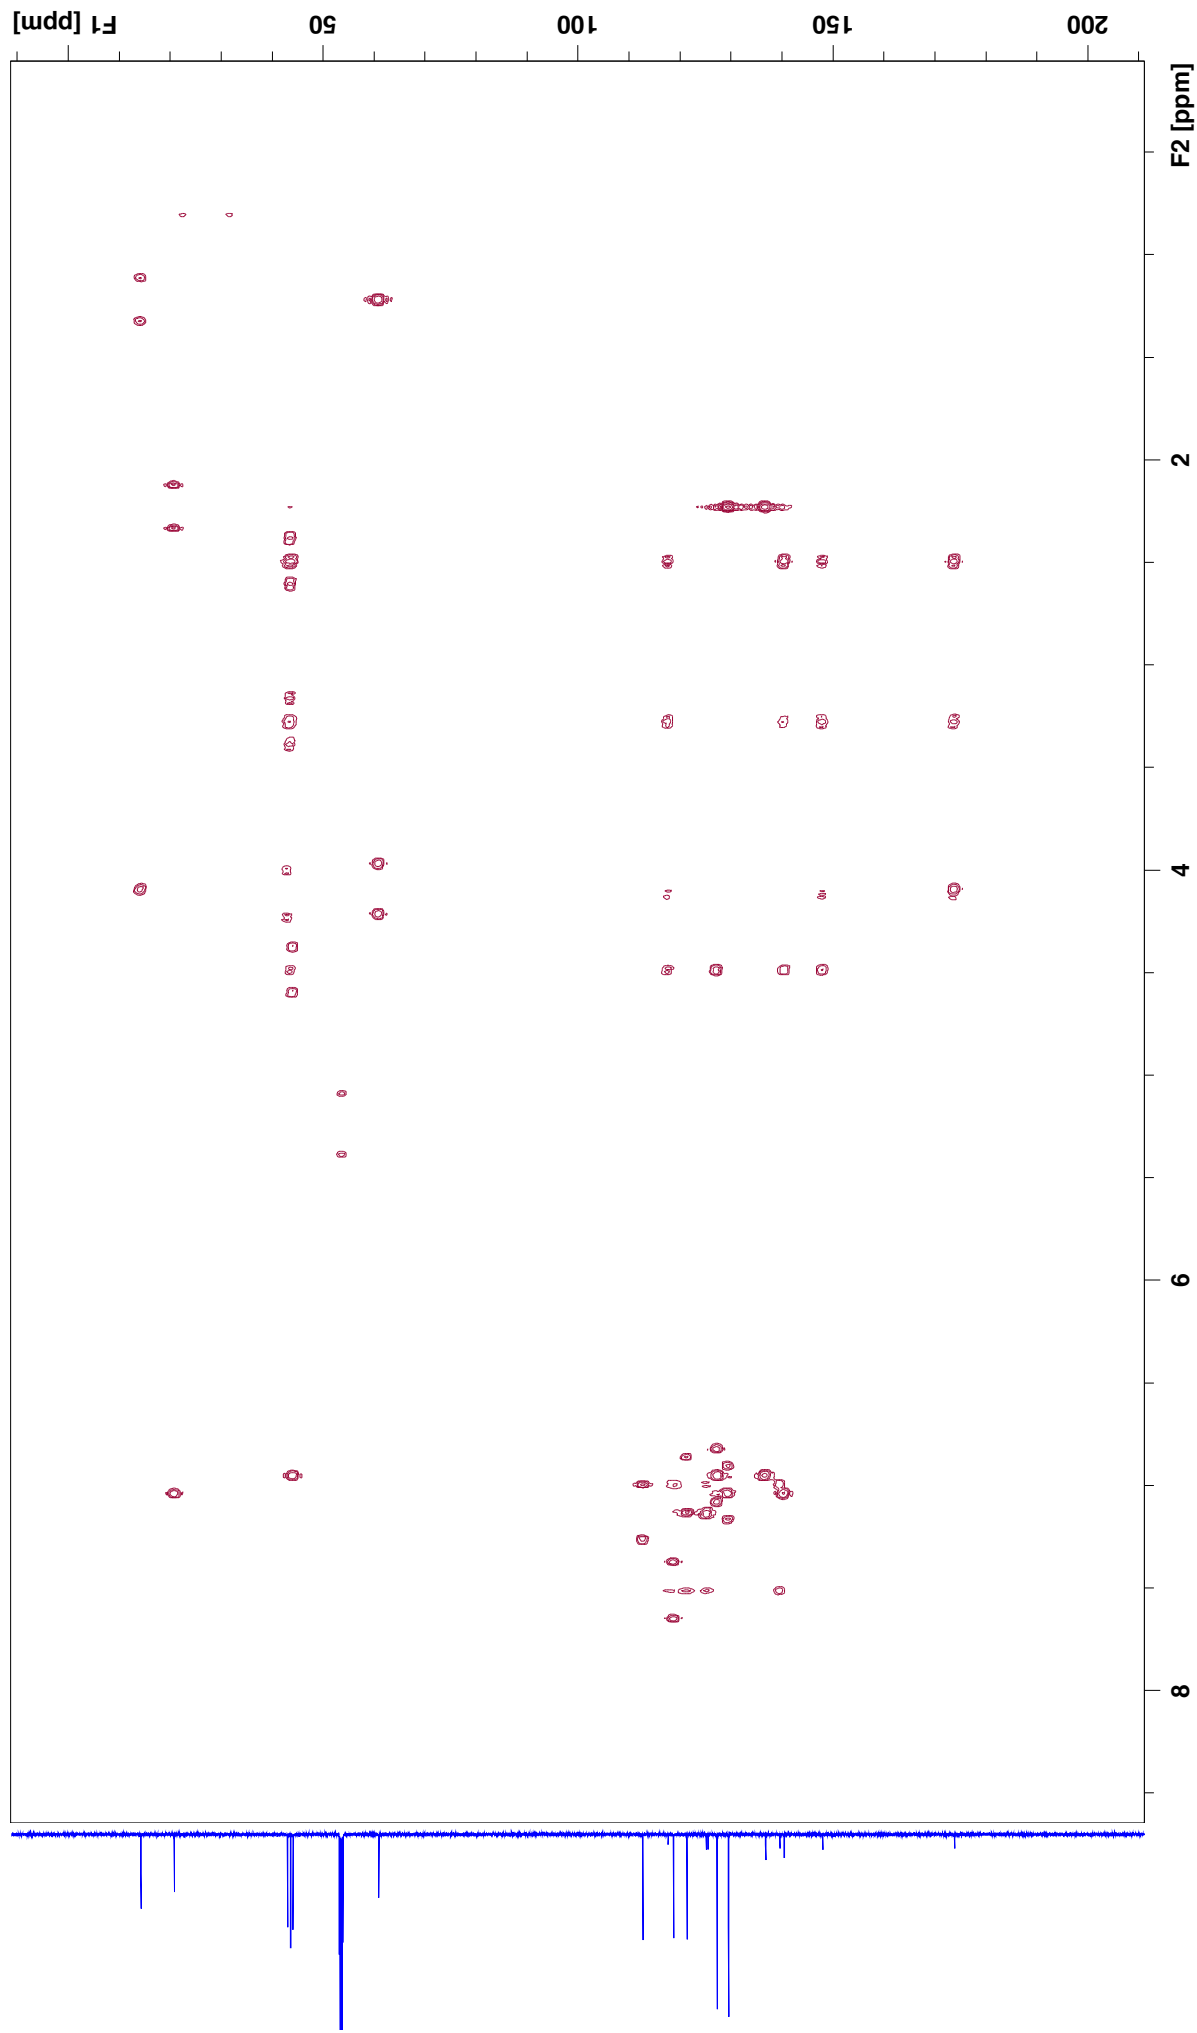

MT-N3-P48-TT23-3-4 24 1 N:\b600\wu\data\wu\_guest\mmr

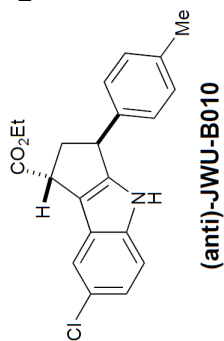

# COSY

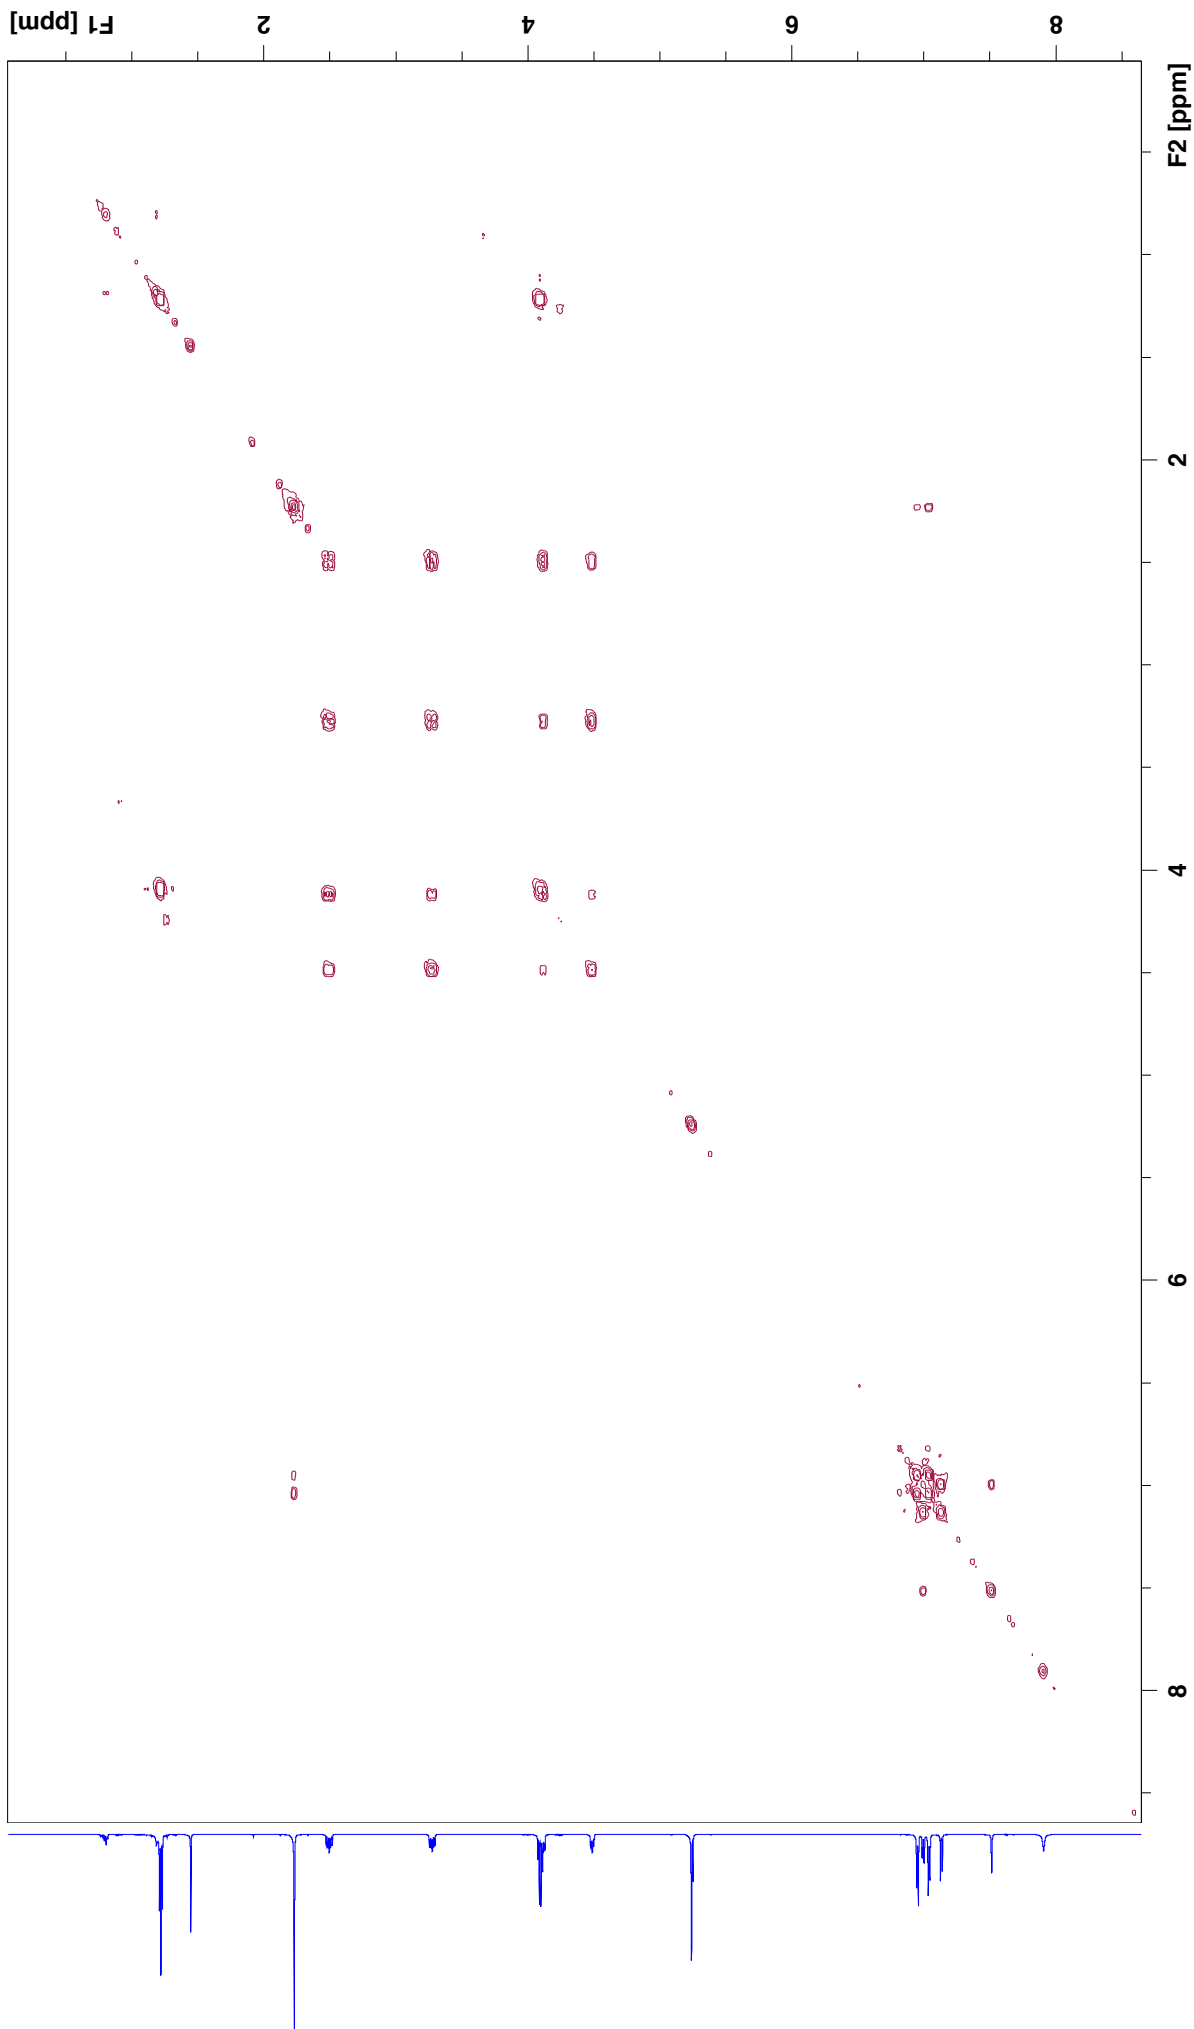

4T-N3-P48-TT23-3-4 23 1 N:\b600\wu\data\wu\_guest\mmr

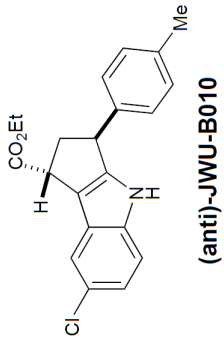

NOESY

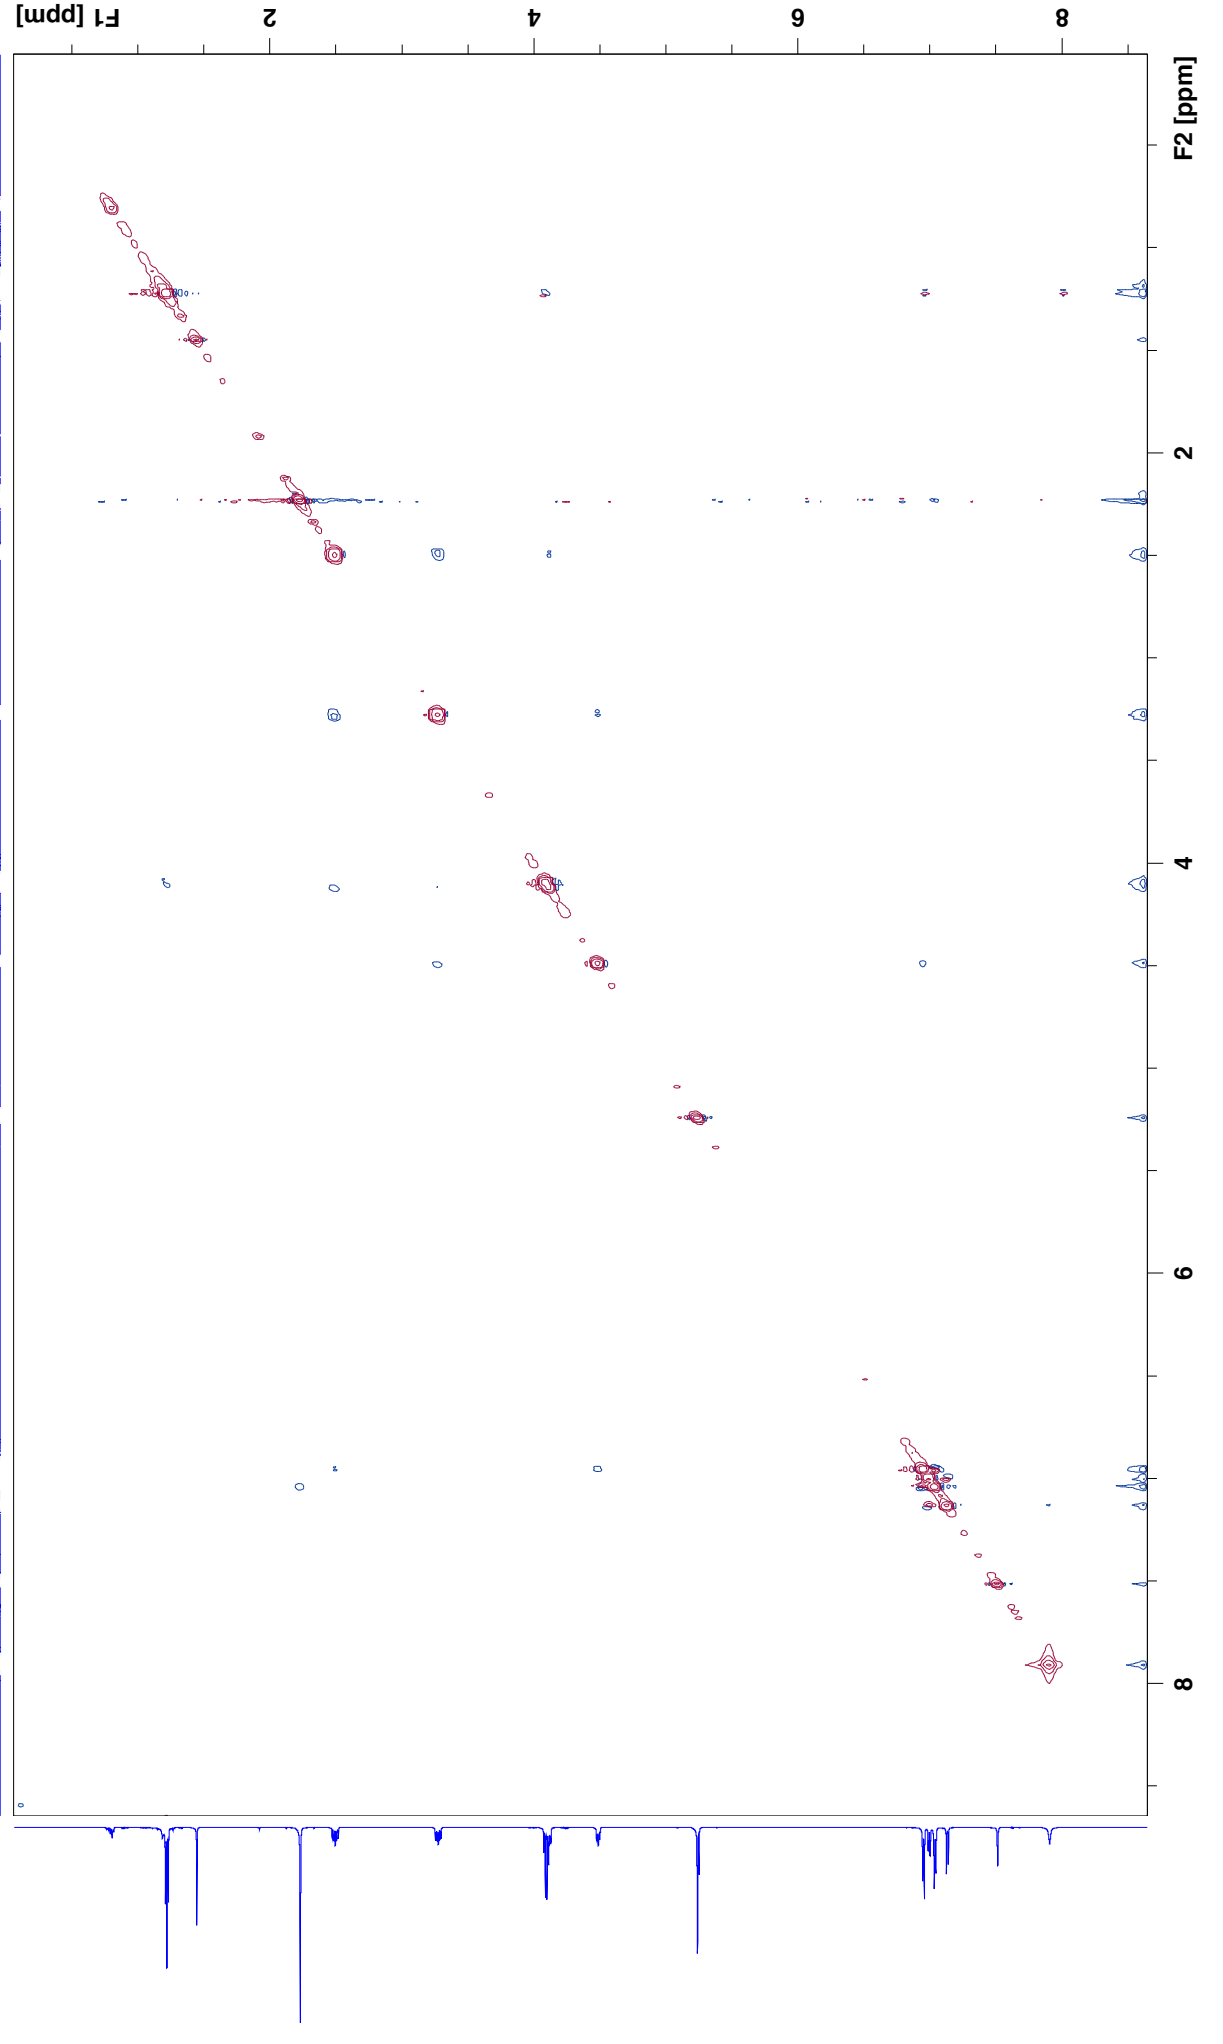



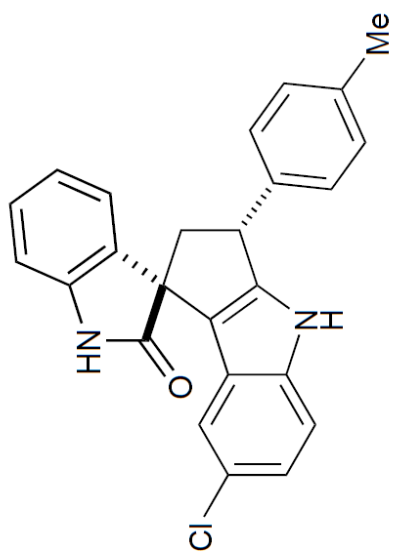

**(anti)-JWU-B011**

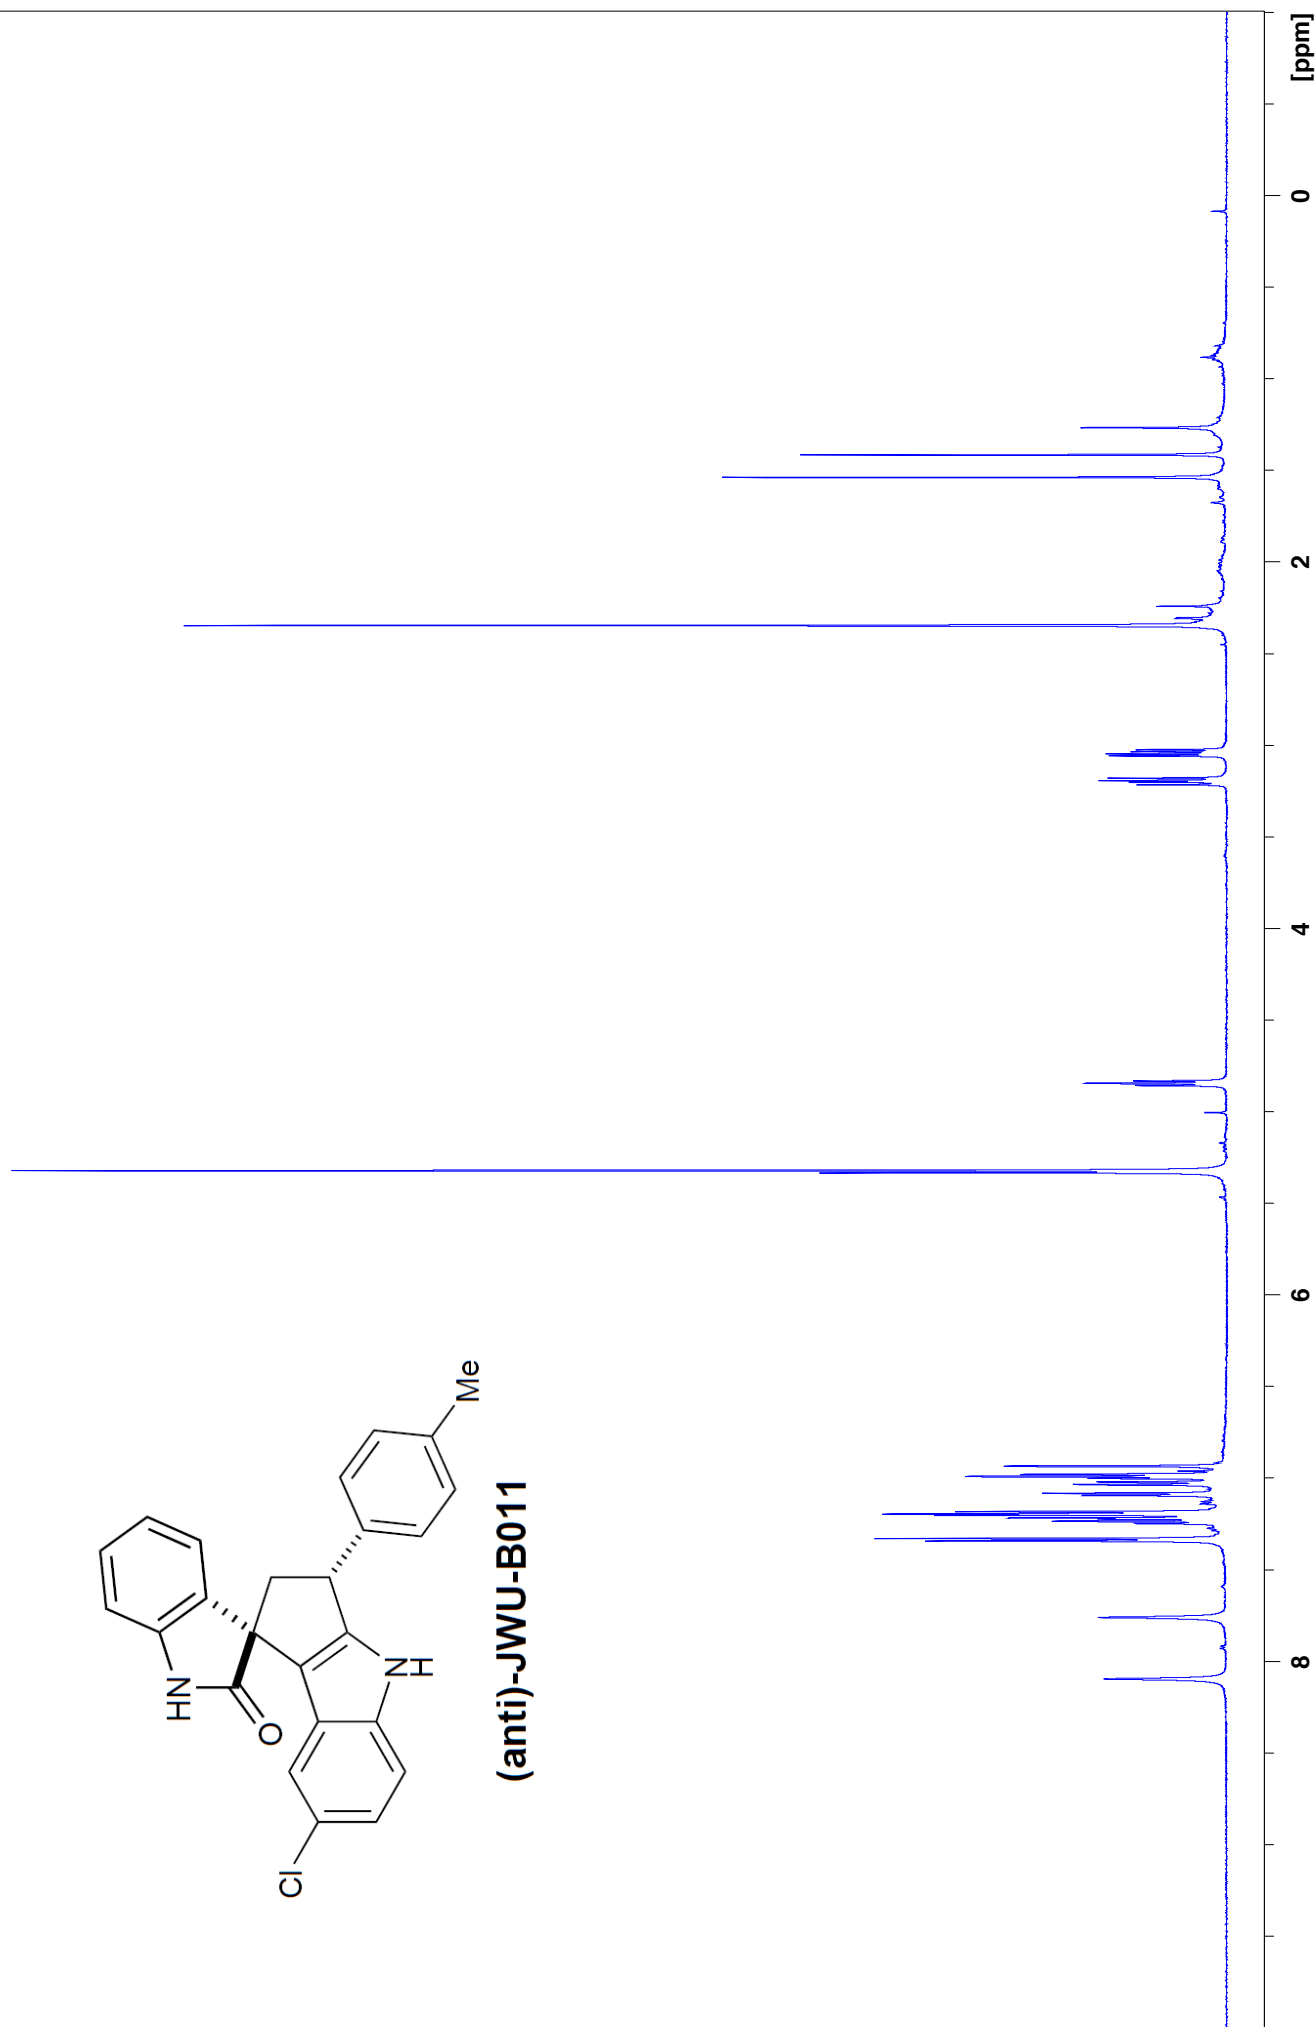

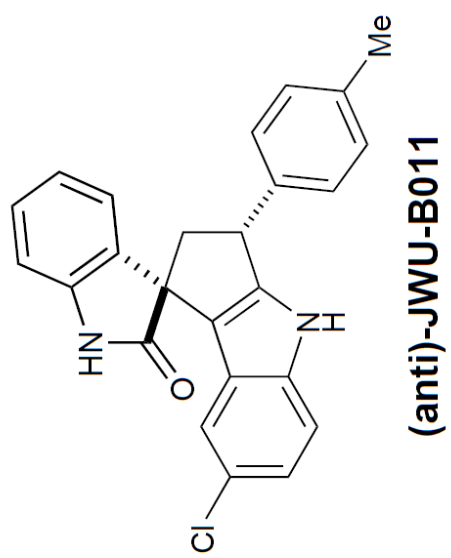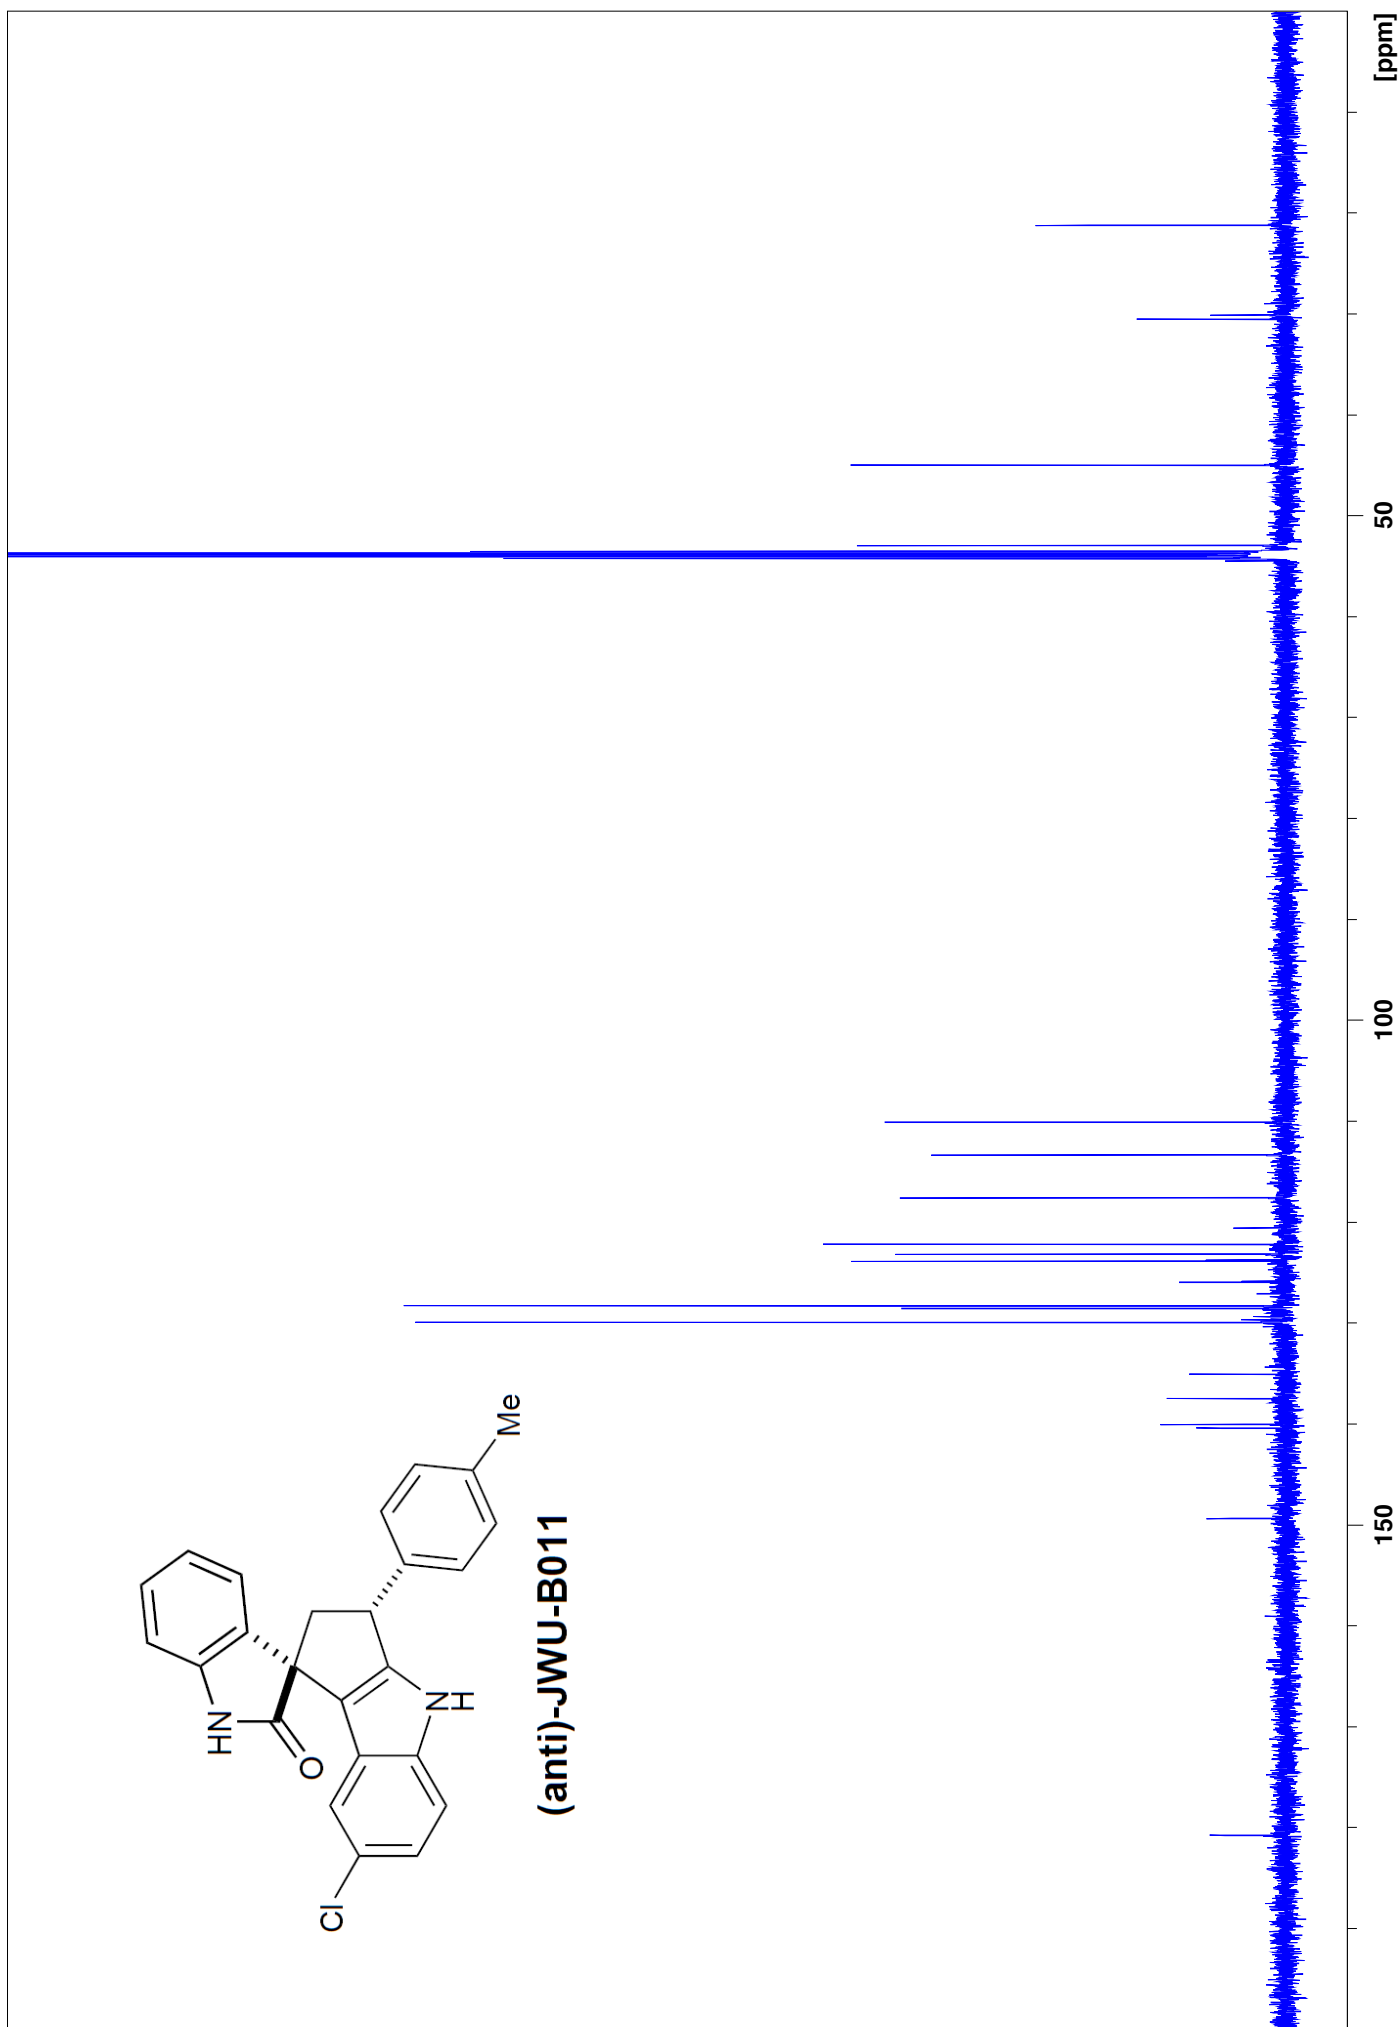

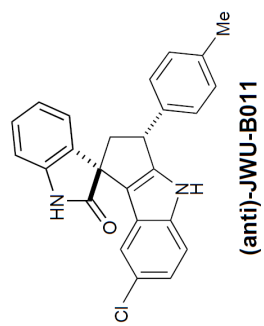

[-N3-P86-46-48-6-7 22 1 "I:\3+2 Products"

HMQC

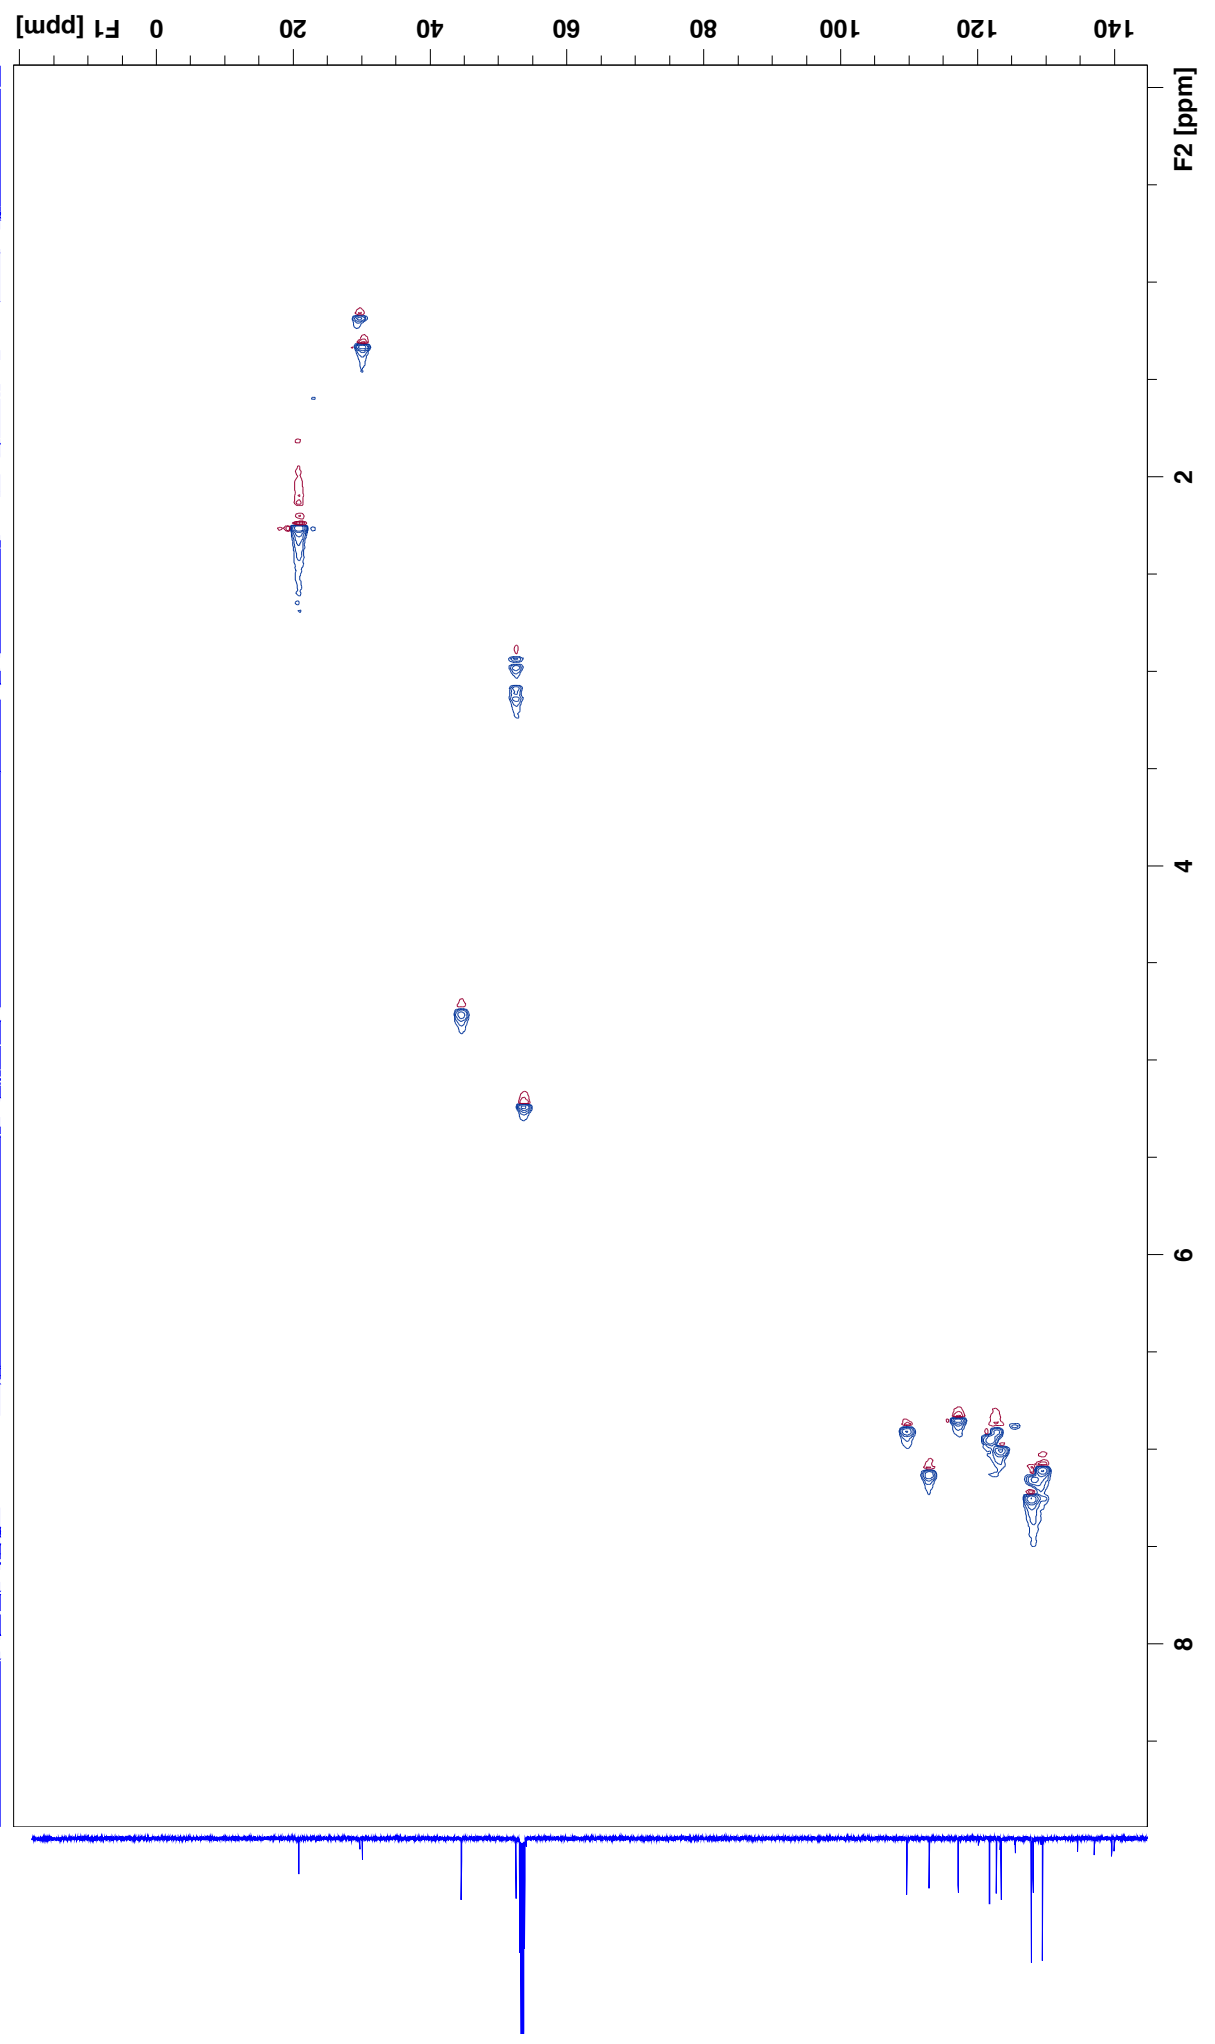

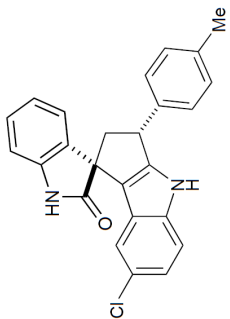

(anti)-JWU-B011

T-N3-P86-46-48-6-7 23 1 "I:\3+2 Products"

# HMBC

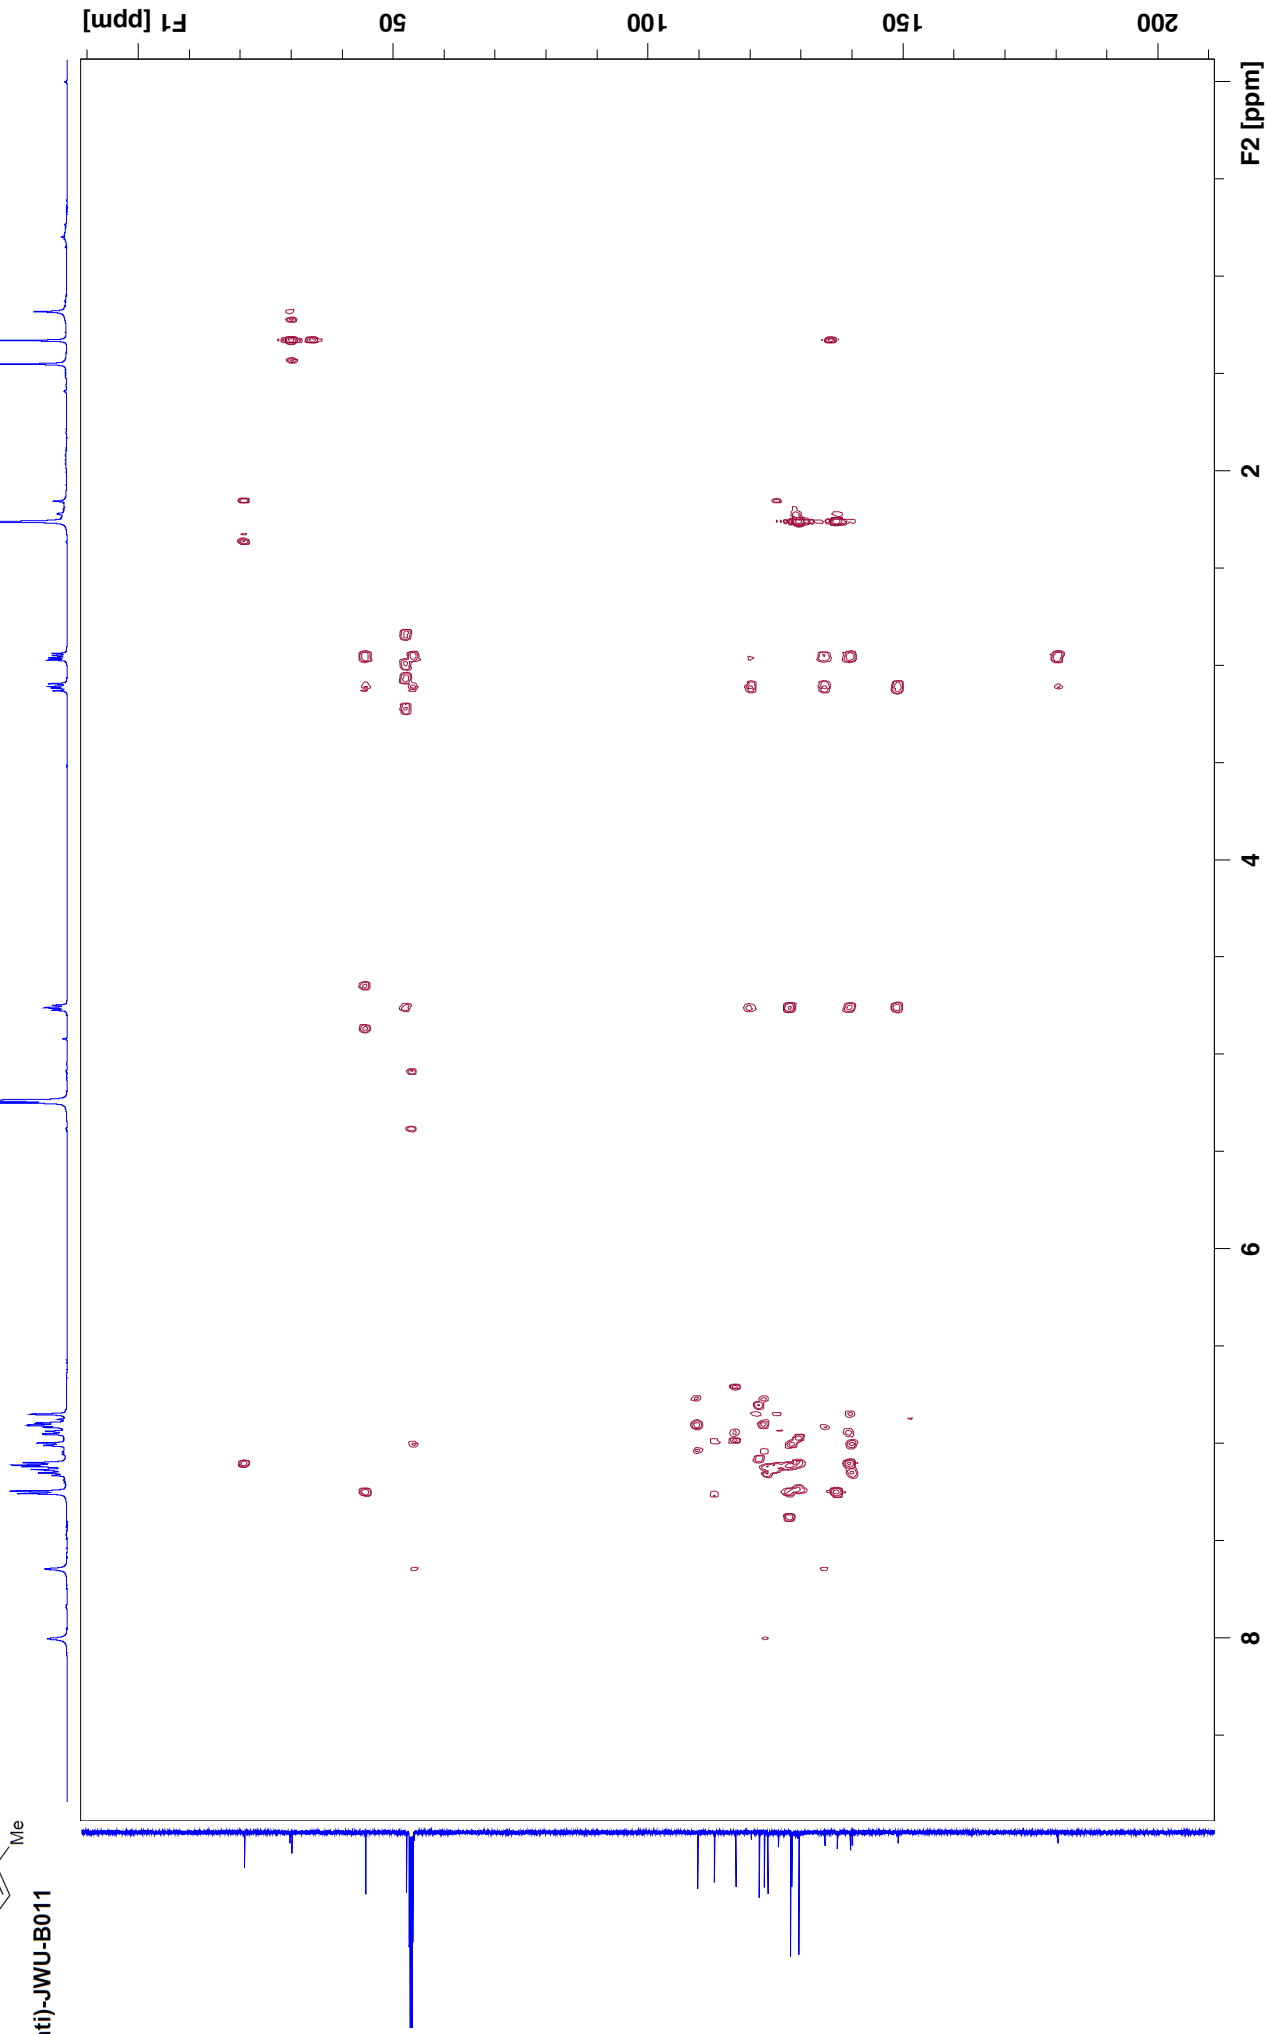

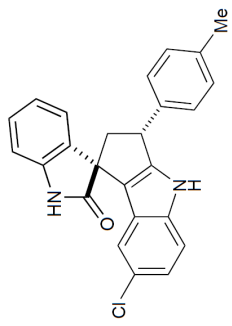

(anti)-JWU-B011

IT-N3-P86-46-48-6-7 24 1 "I:\3+2 Products"

**COSY**

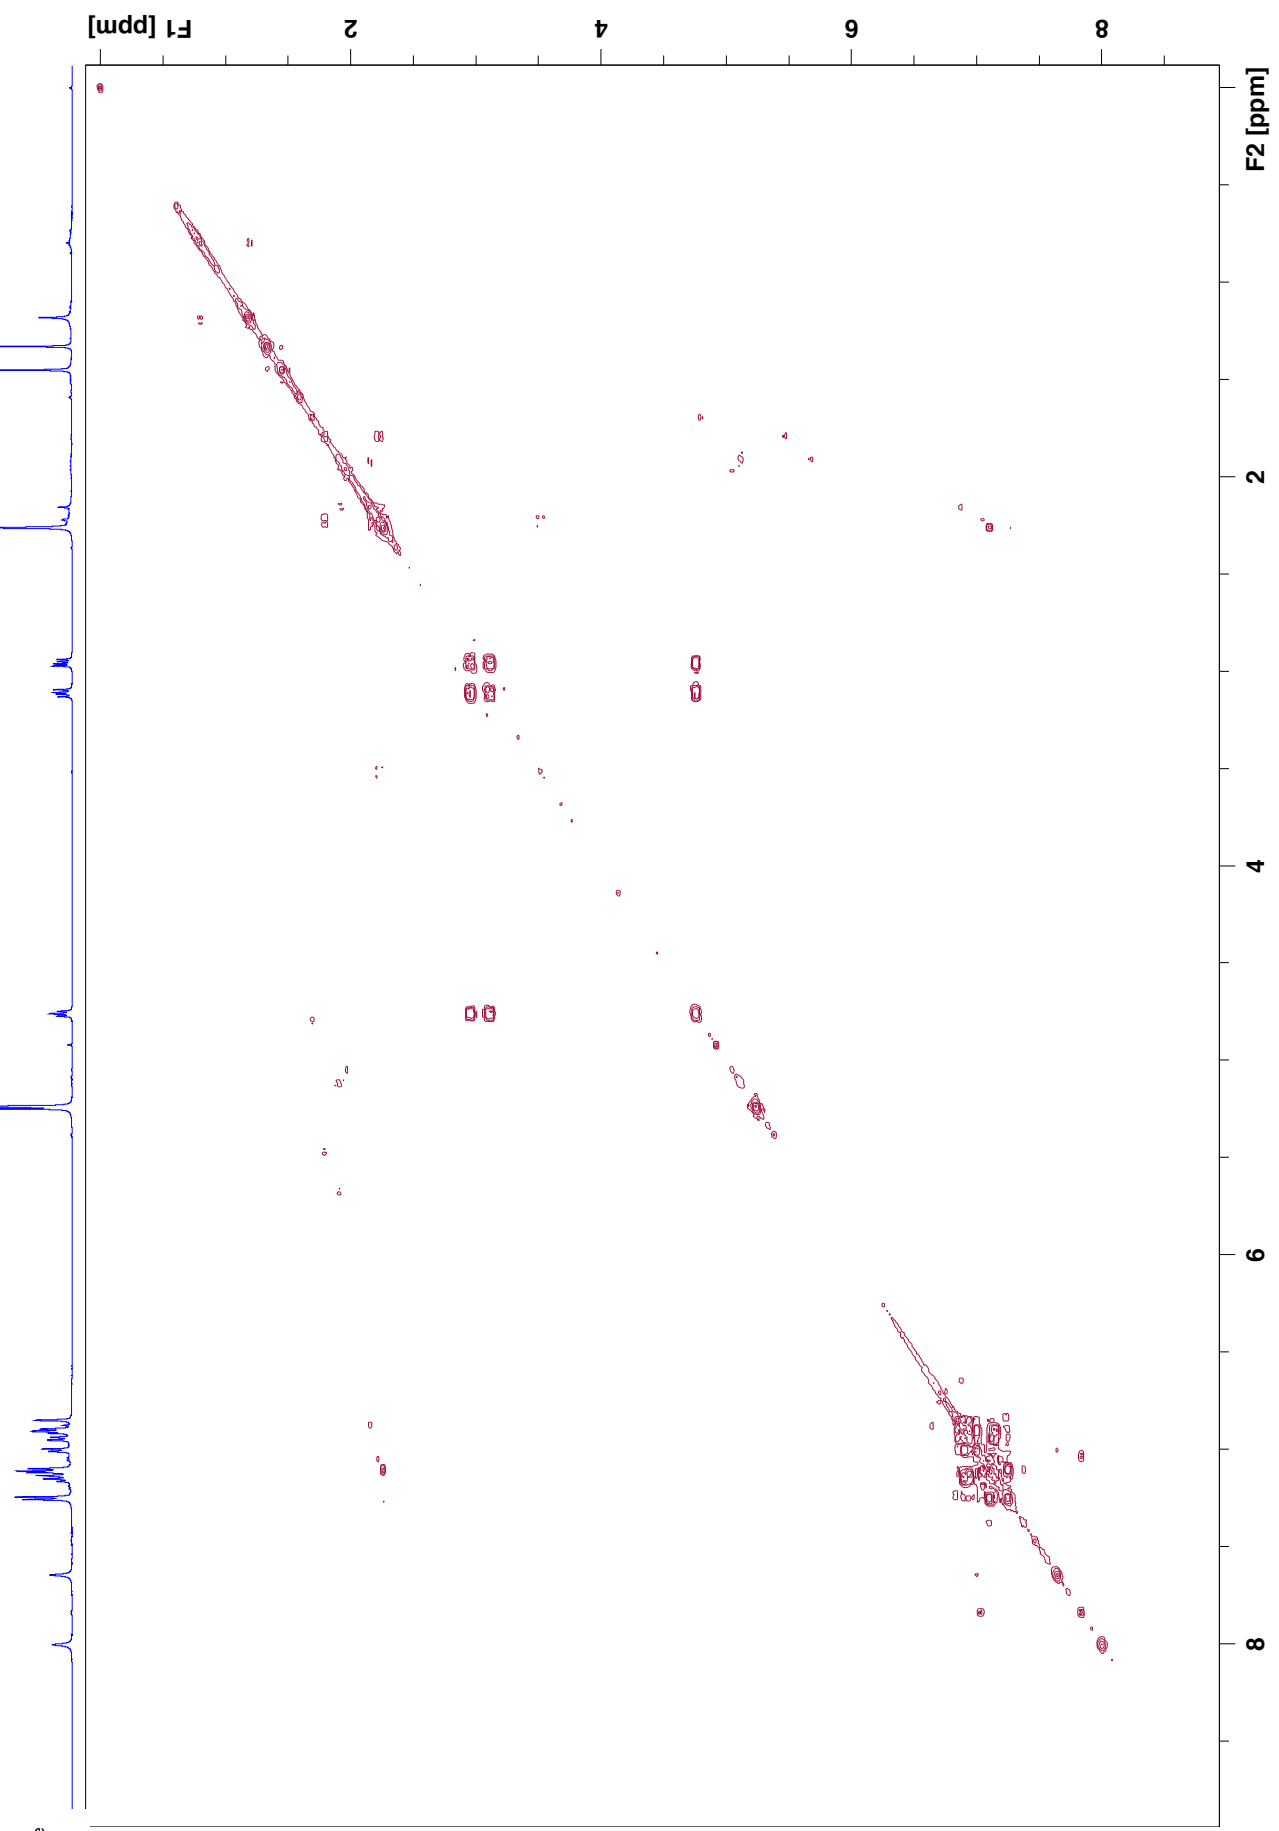

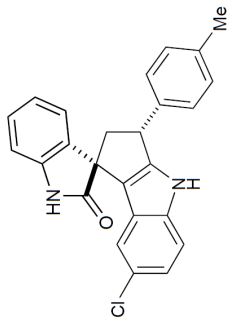

1T-N3-P86-46-48-6-7 25 1 "I:\3+2 Products"

NOESY

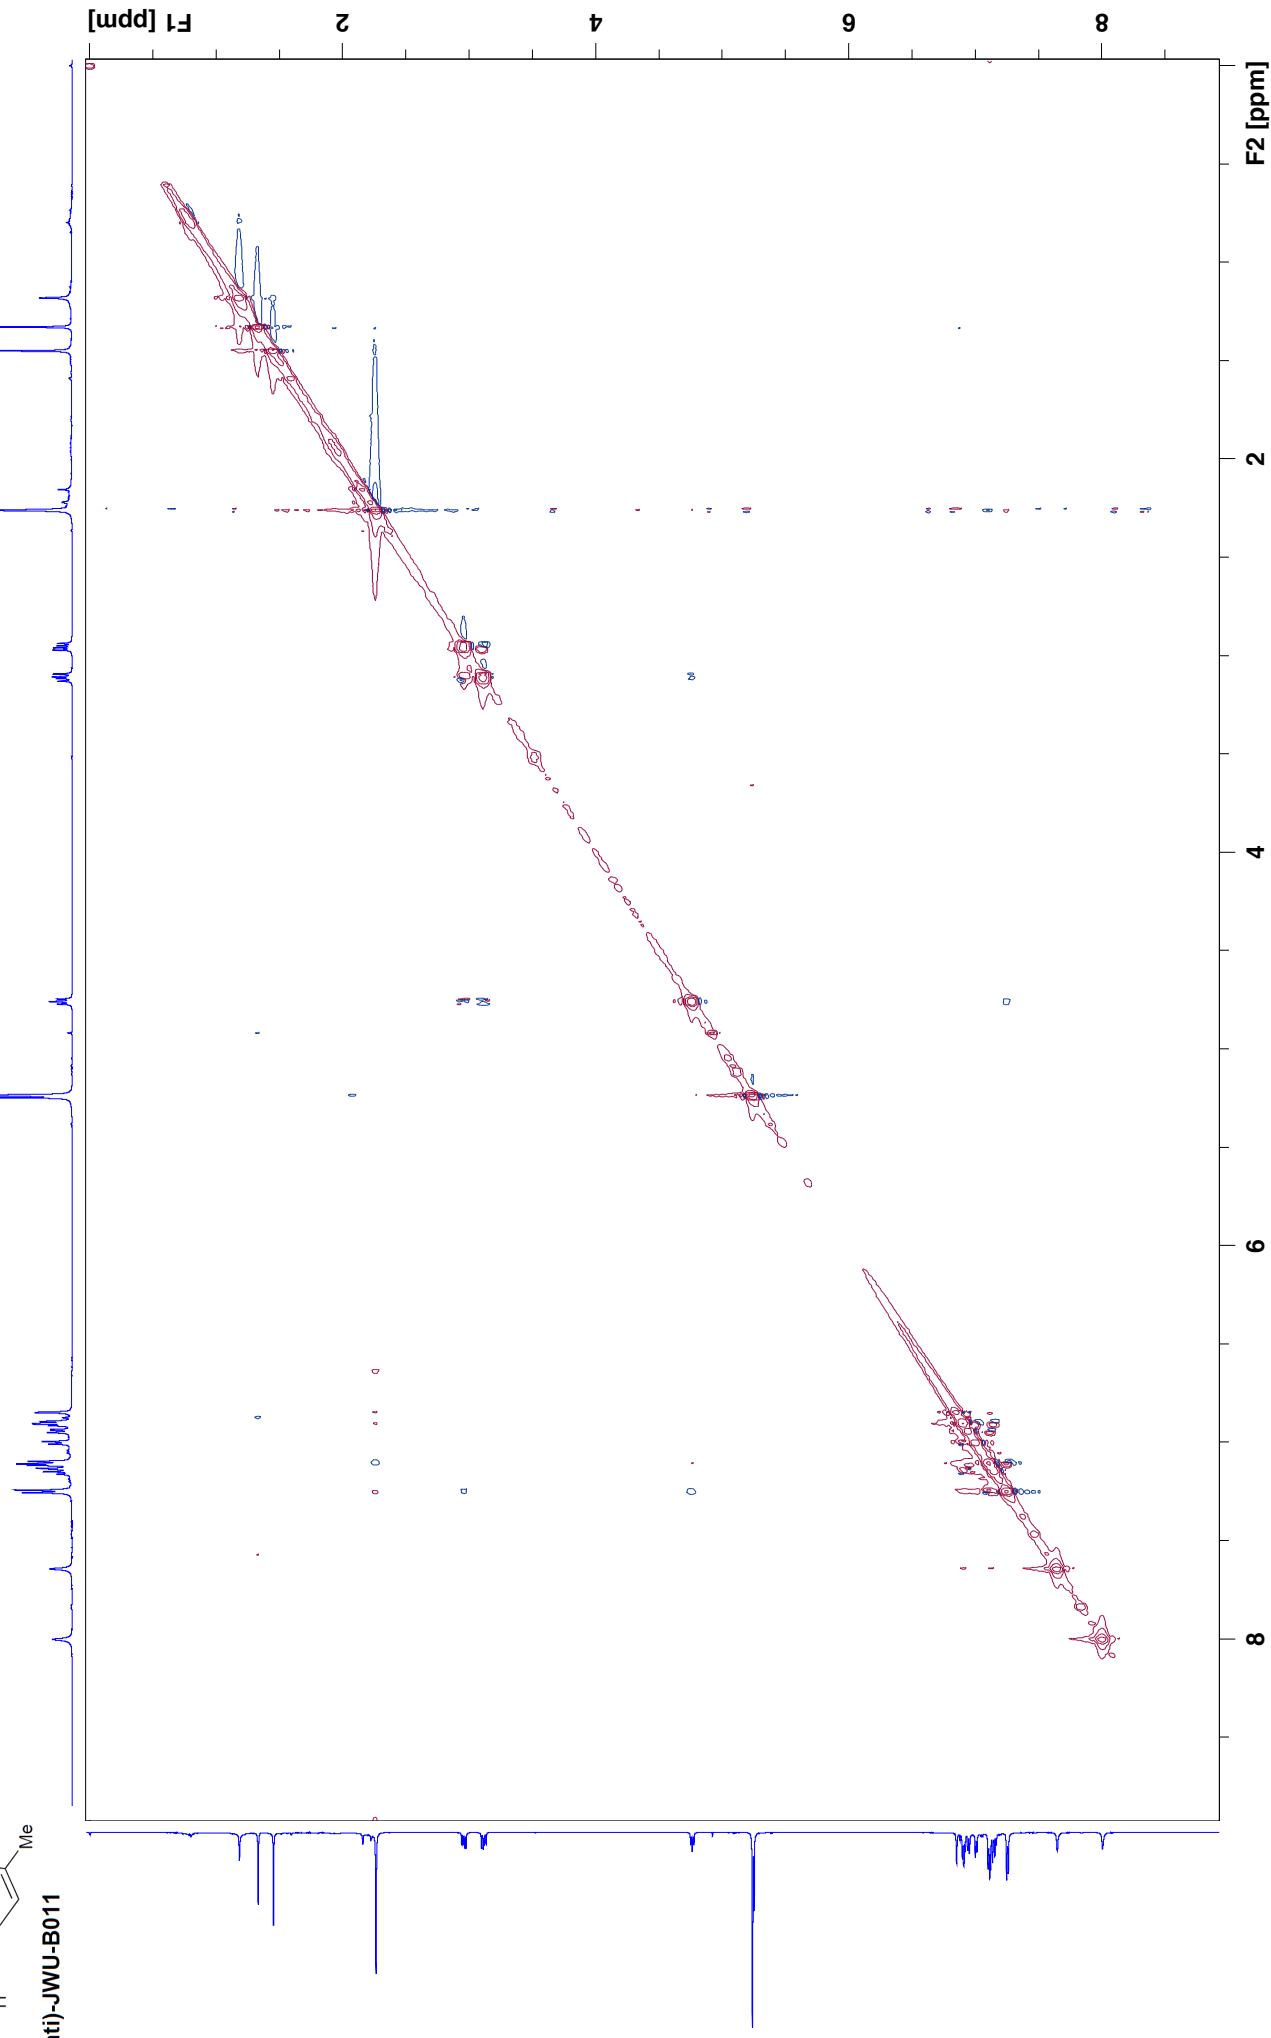

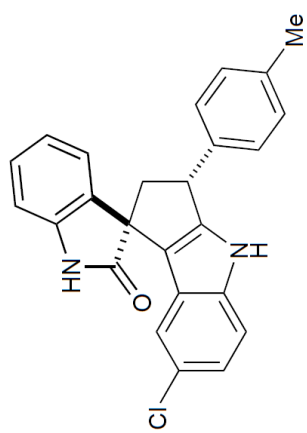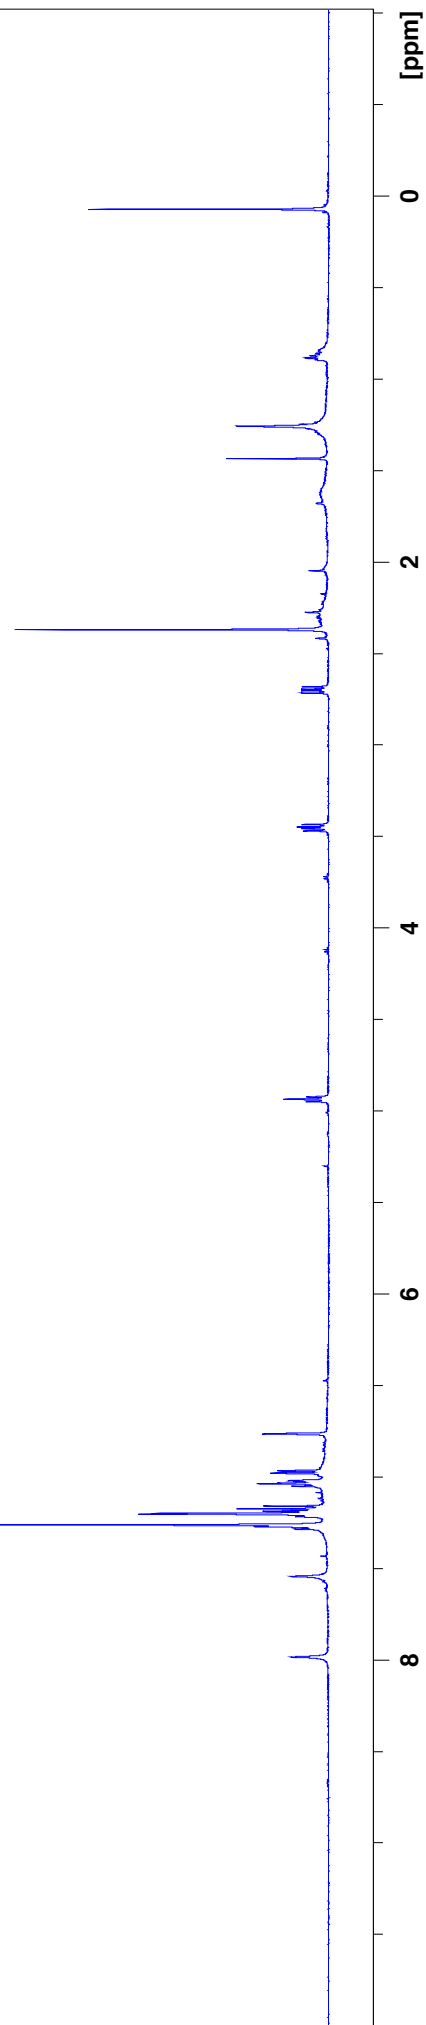

"MCD-06-02c carbon" 11 1 /Users/mariacdipoto/Desktop/NMR

m\_dipoto  
WU

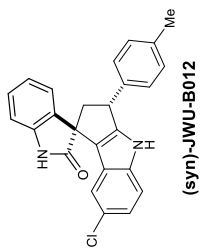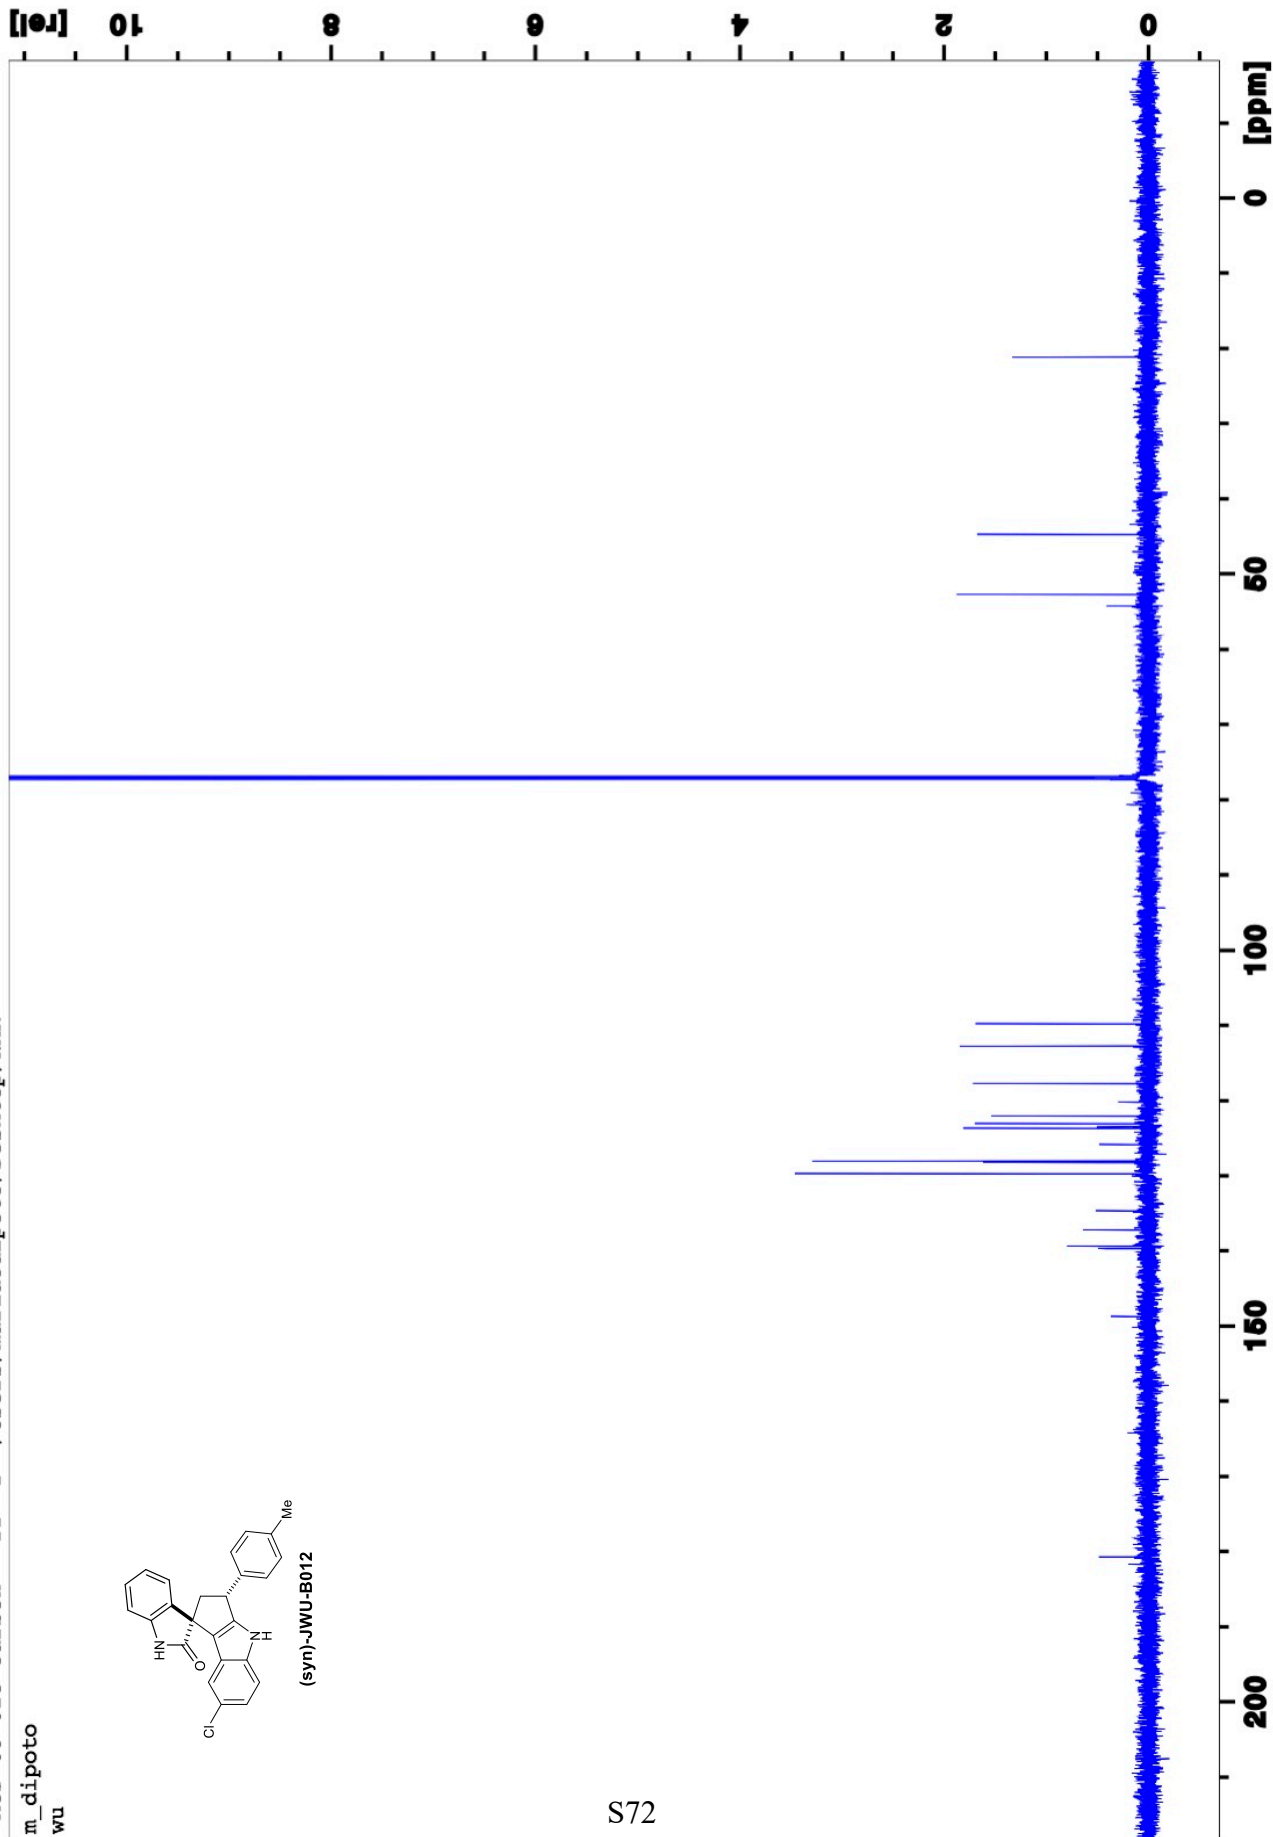



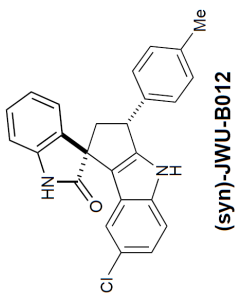

MT-N3-P86-55-59-7-9 13 1 "I:\3+2 Products"

HMQC

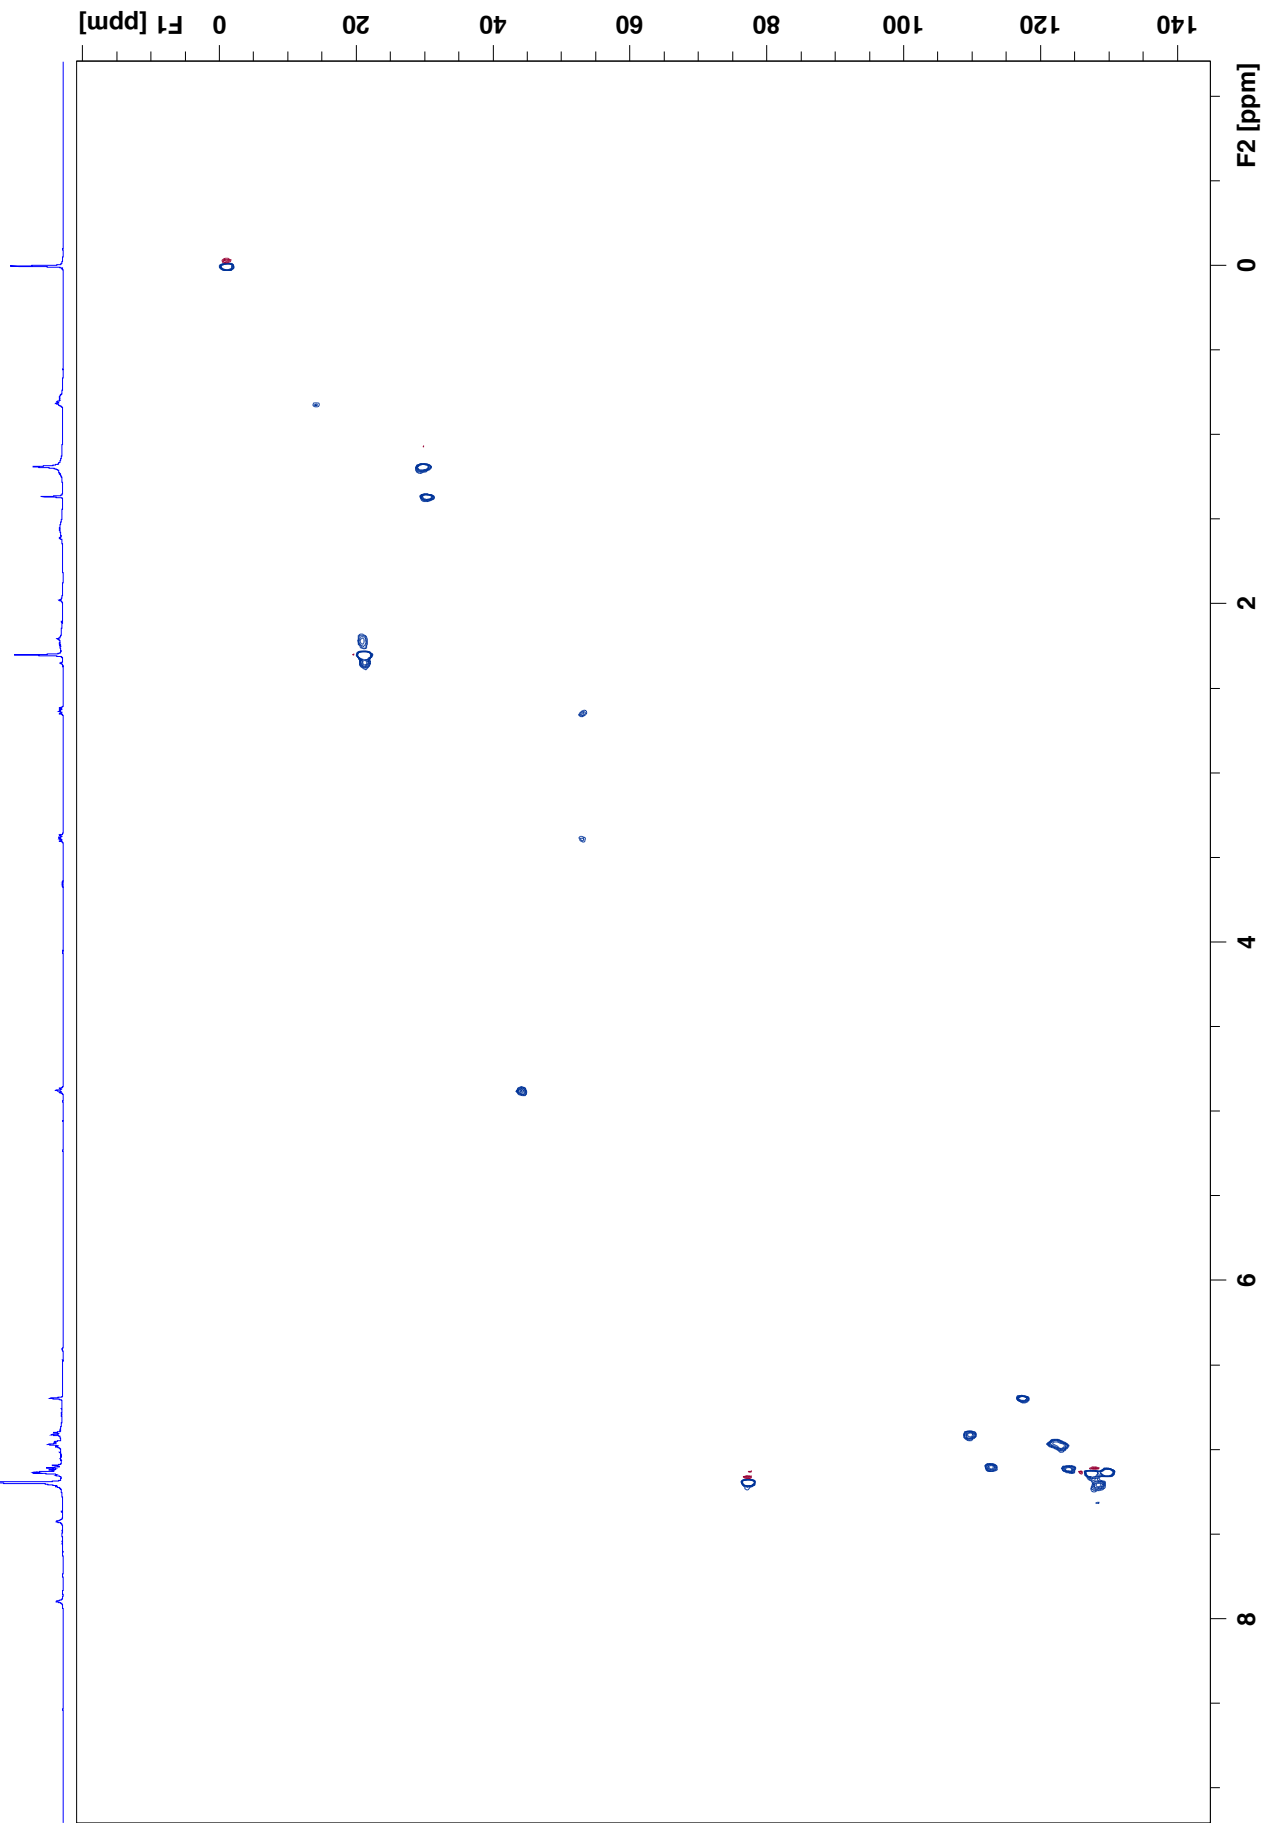

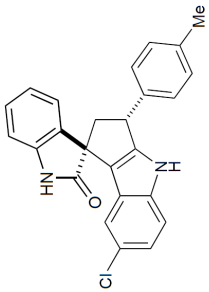

MT-N3-P86-55-59-7-9 14 1 "I:\3+2 Products"

# HMBC

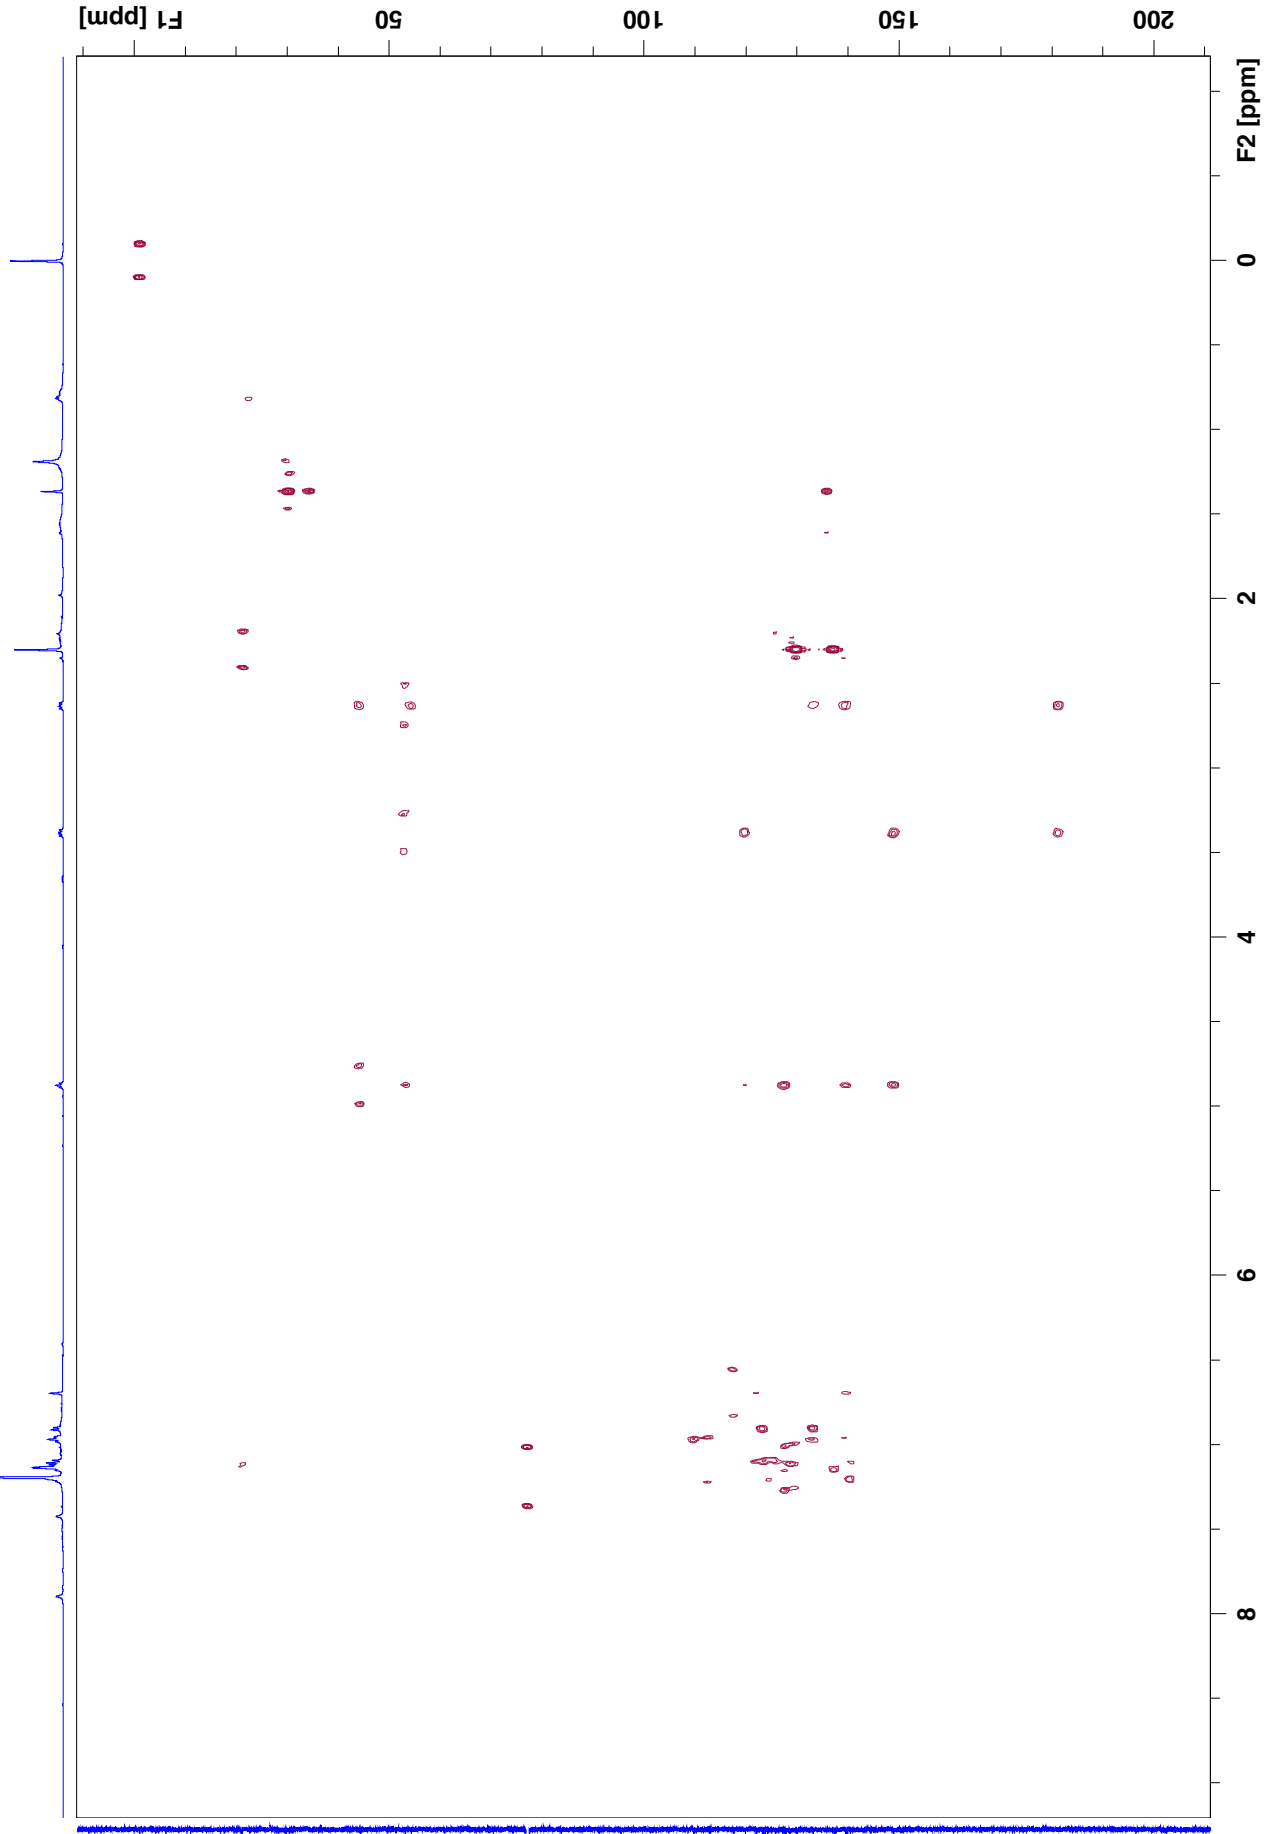

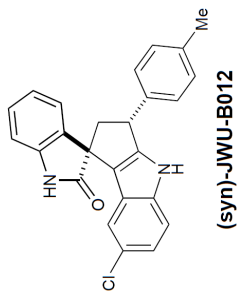

MT-N3-P86-55-59-7-9 15 1 "I:\3+2 Products"

# COSY

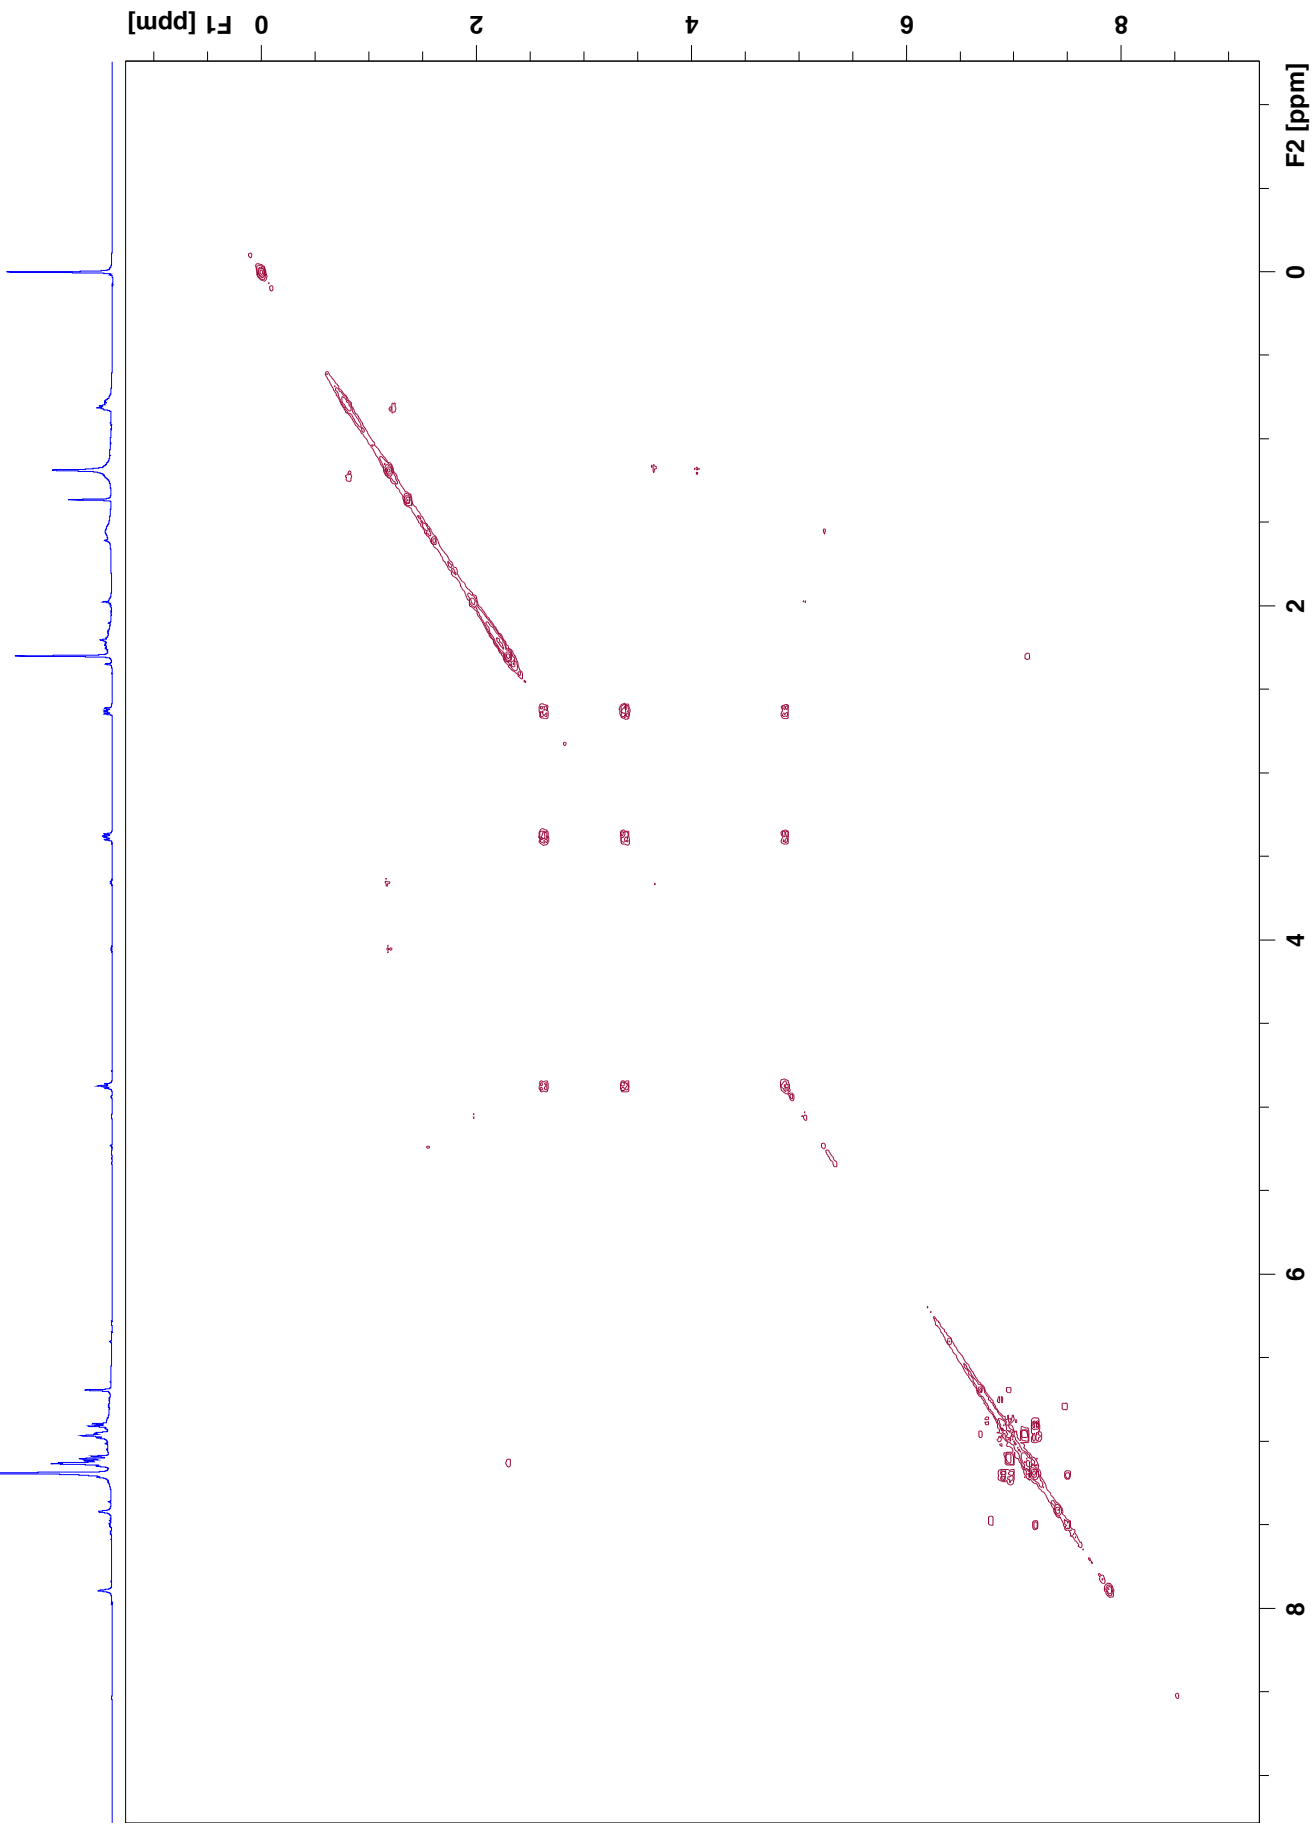

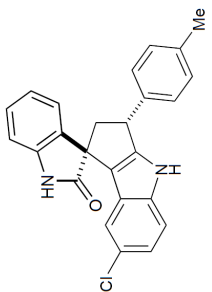

(syn)-JWU-B012

MT-N3-P86-55-59-7-9 16 1 "I:\3+2 Products"

NOESY

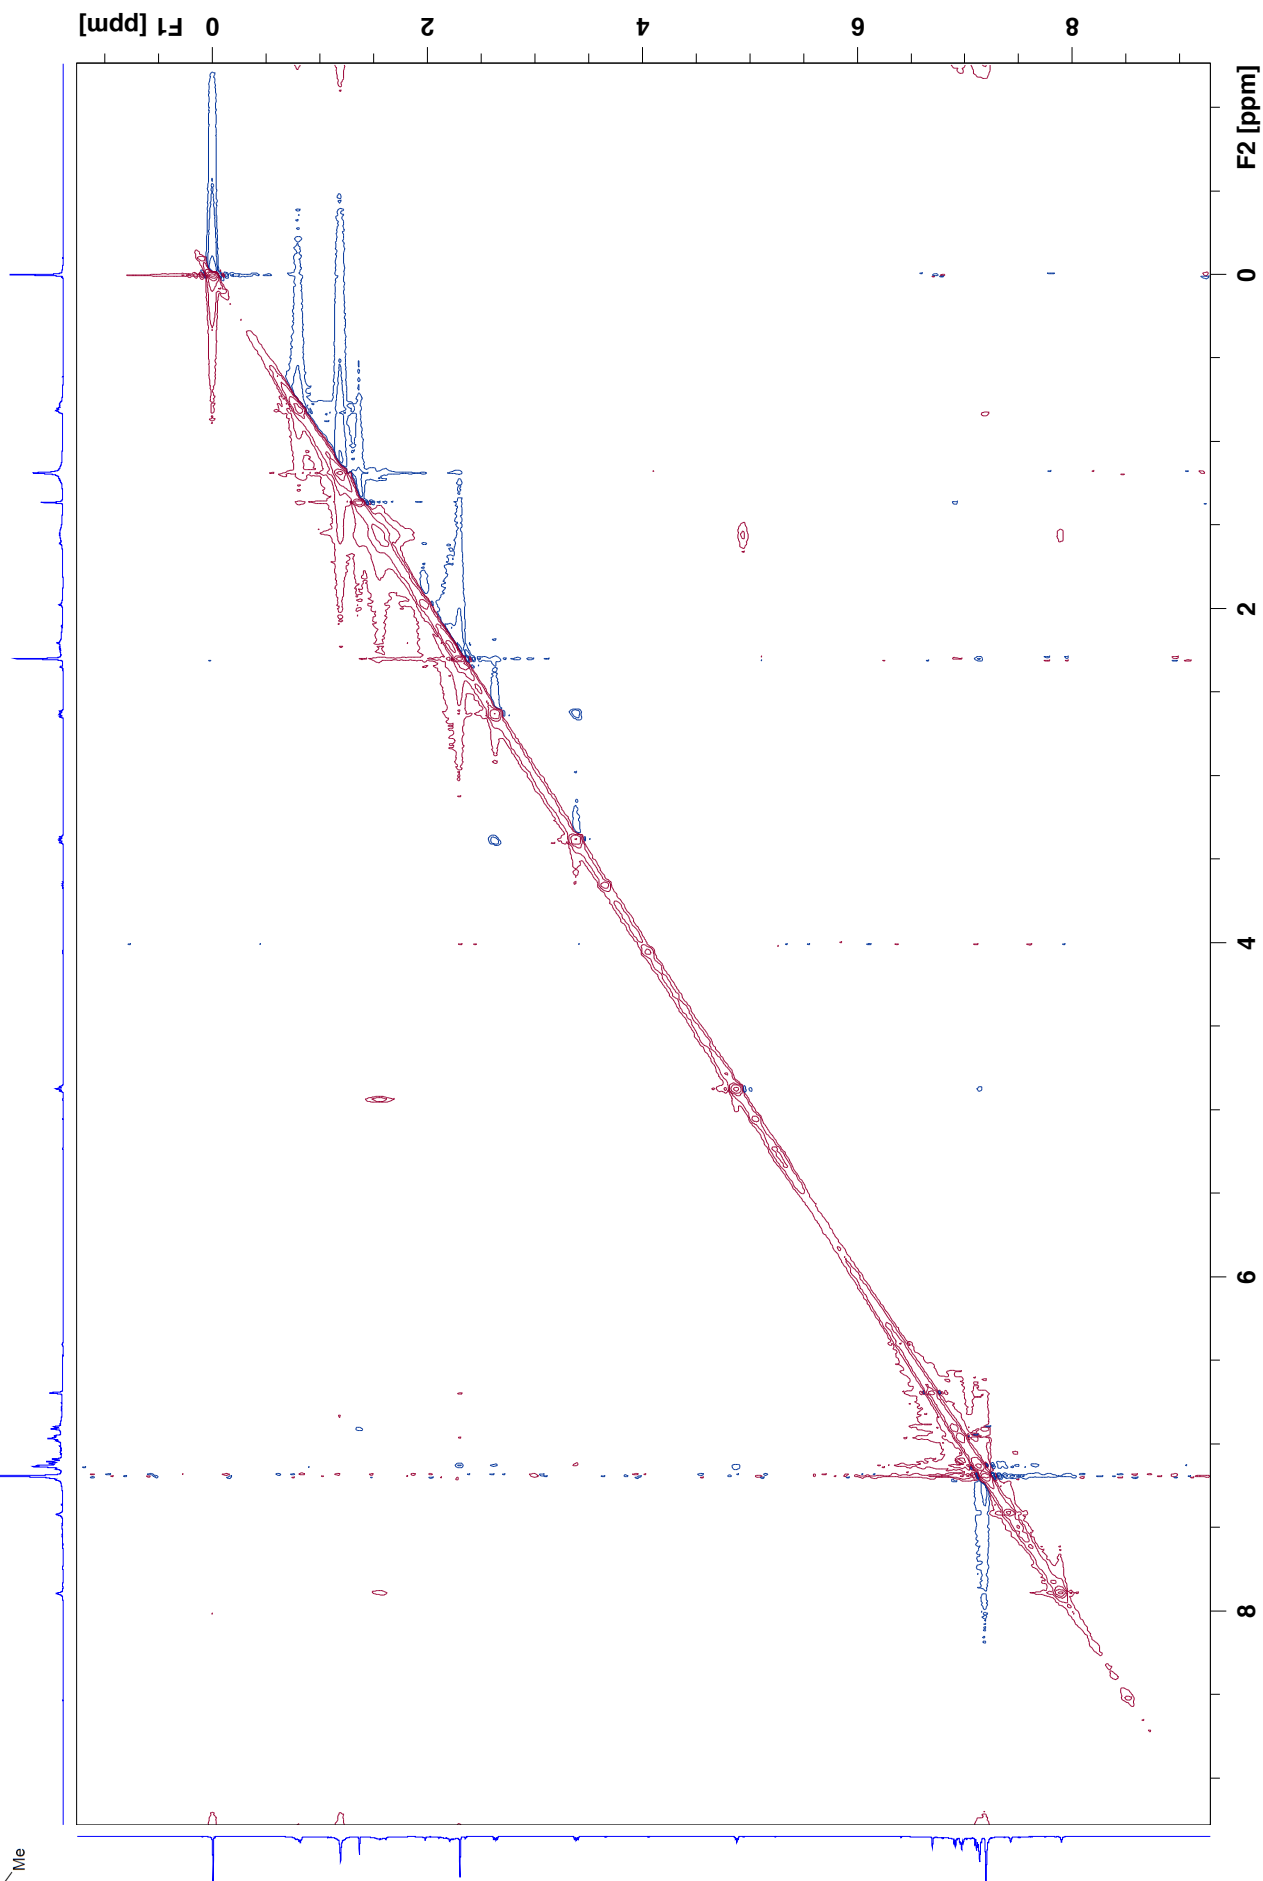

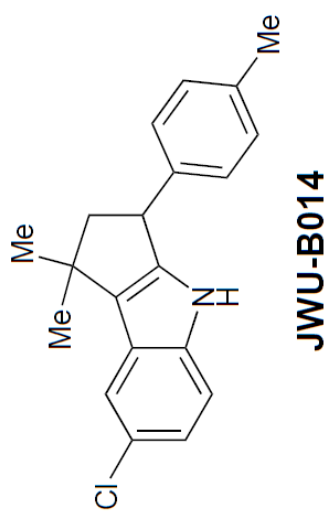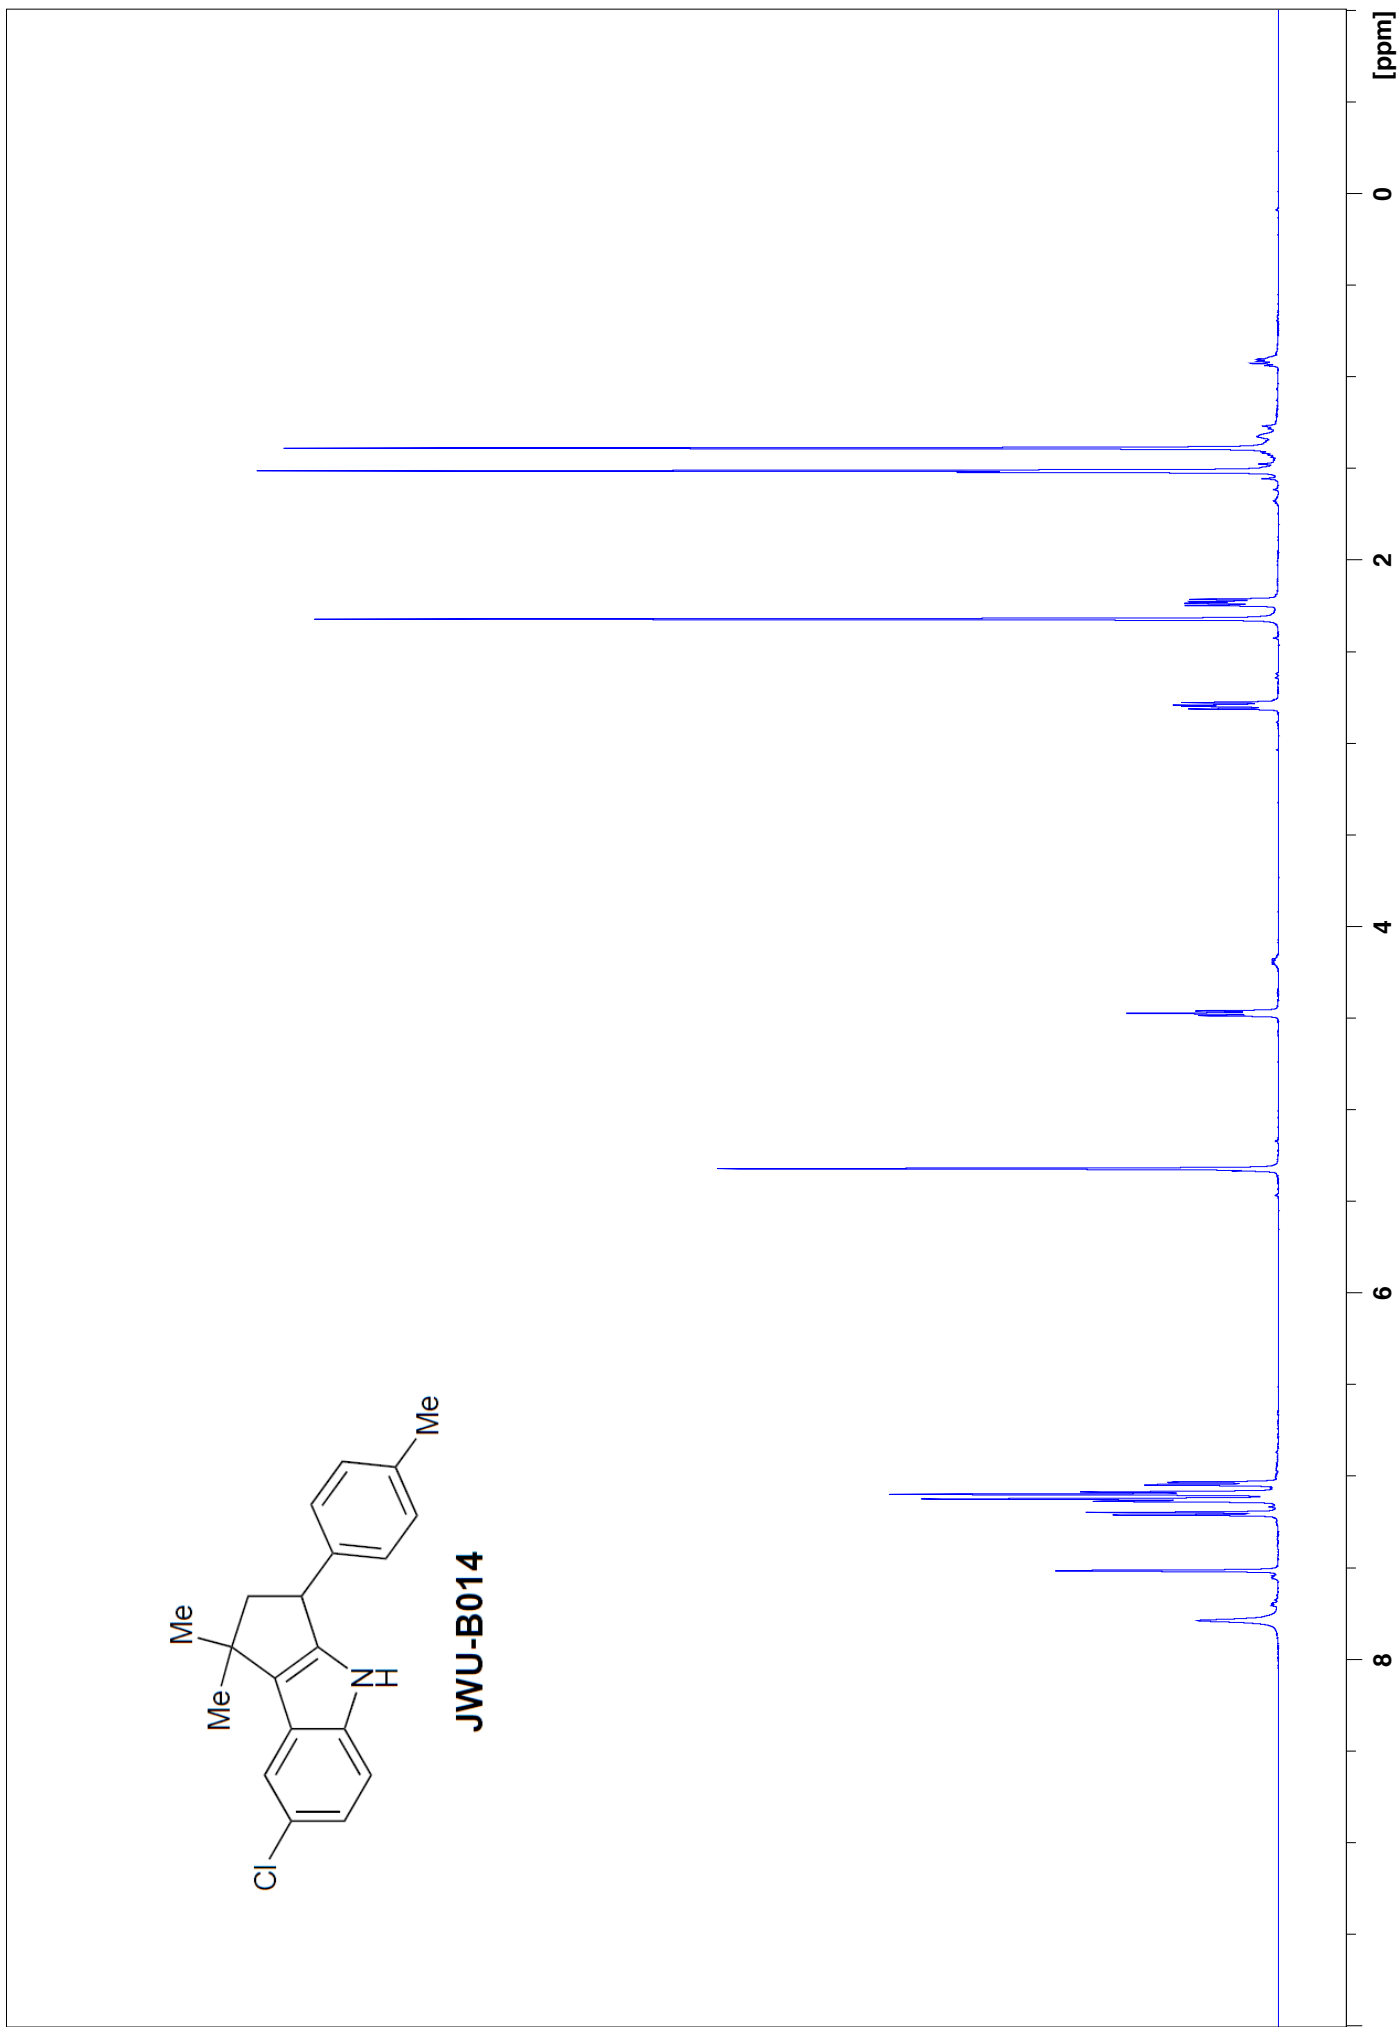

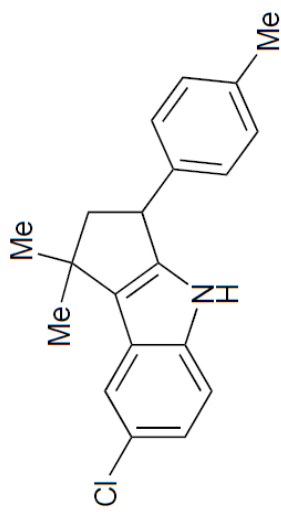

**JWU-B014**

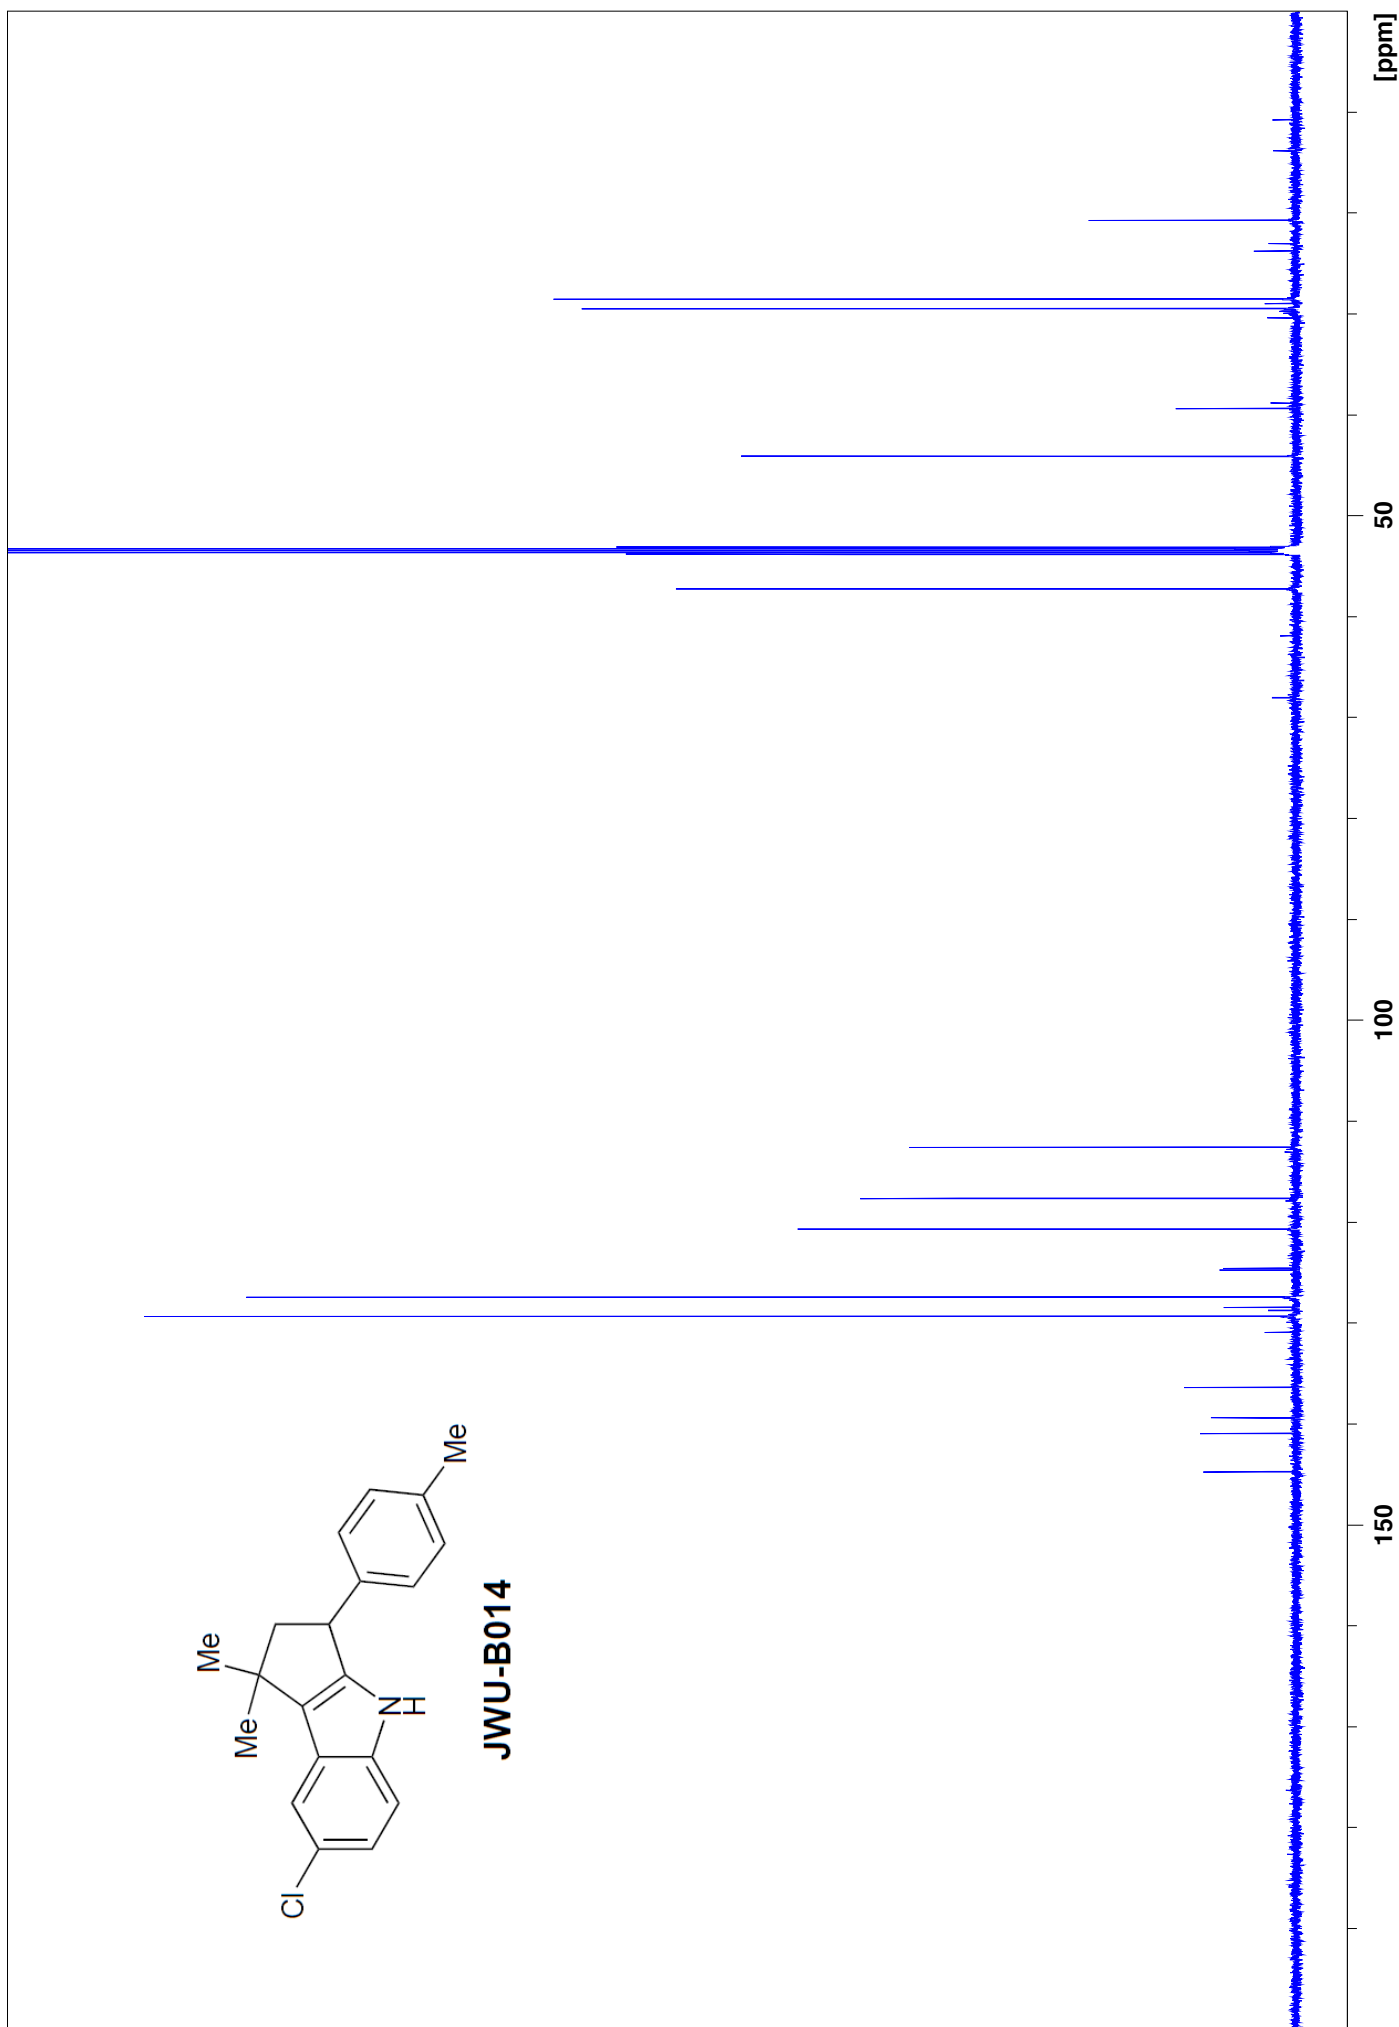

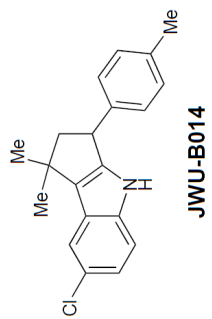

Γ-N3-P42-IT6-8-16-17 13 1 "I:\3+2 Products\MT-N3-P42-IT6-10-16-17"

HMQC

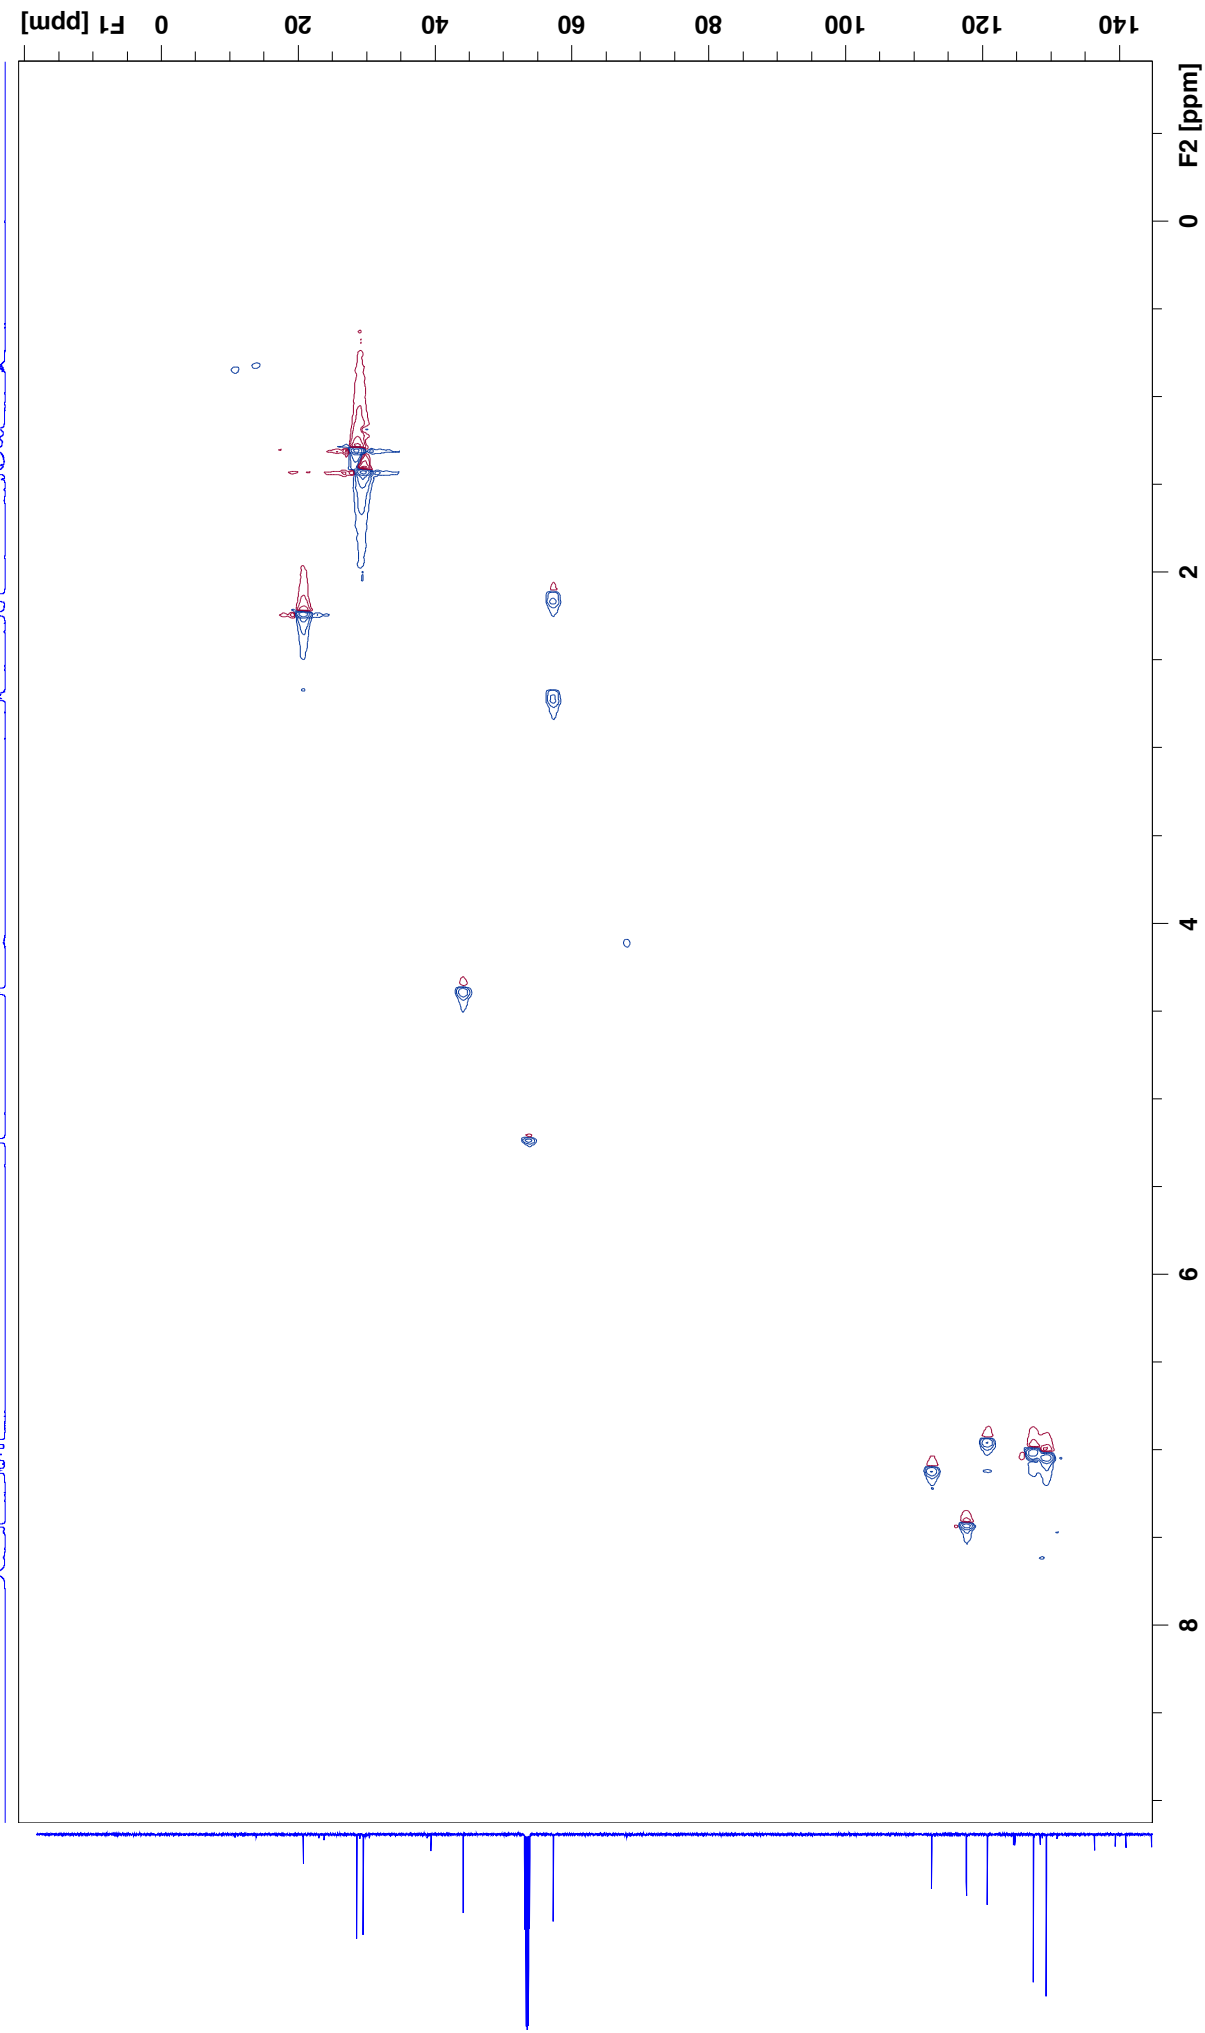

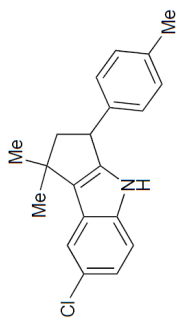

14 1 "I:\3+2 Products\WT-N3-P42-TT6-10-16-17"

HMBC

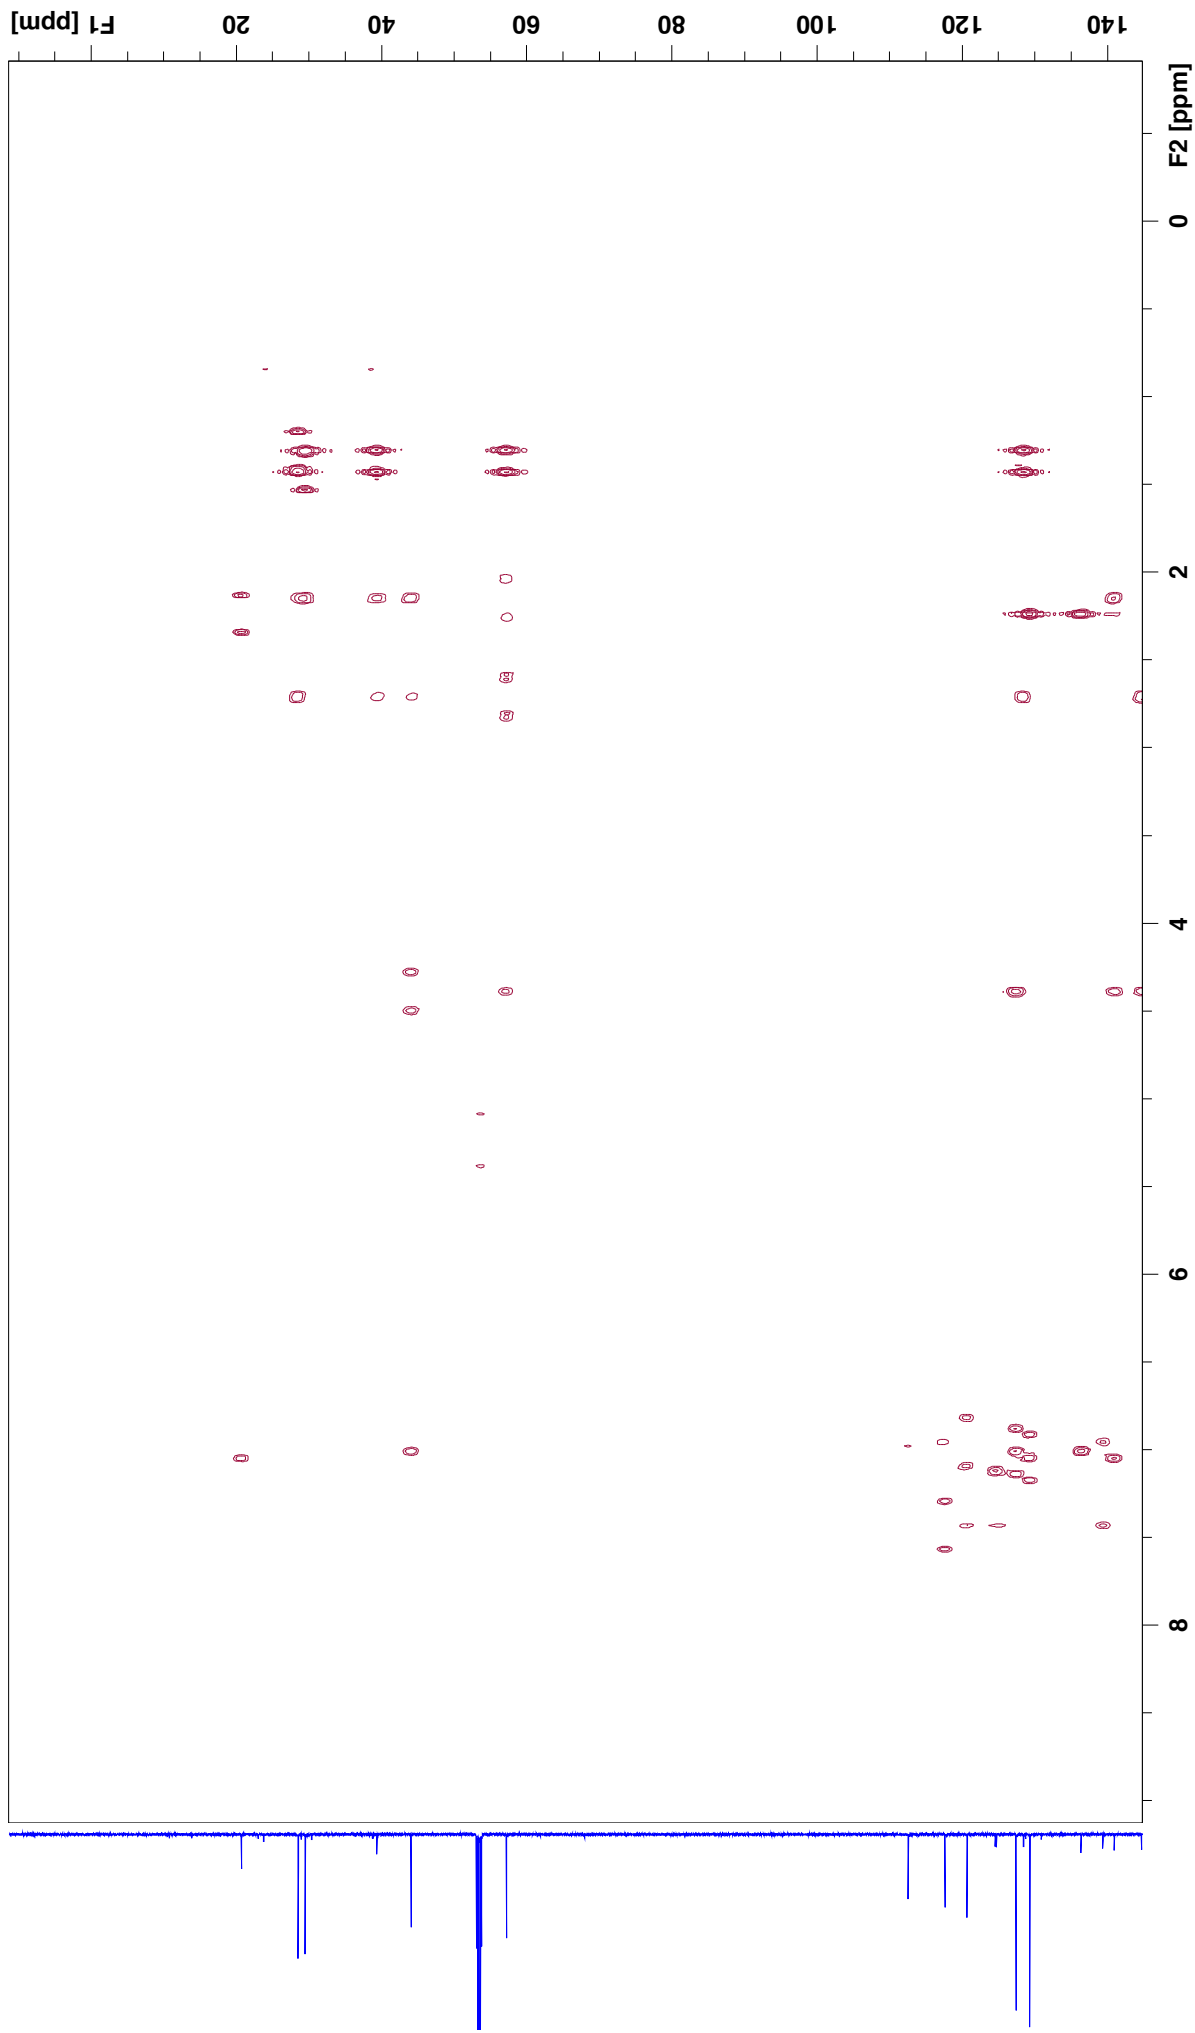



Gamma-N3-P42-TT6-8-16-17 16 1 "I:\3+2 Products\MT-N3-P42-TT6-10-16-17"

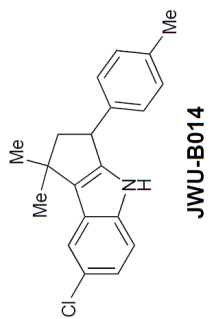

# COSY

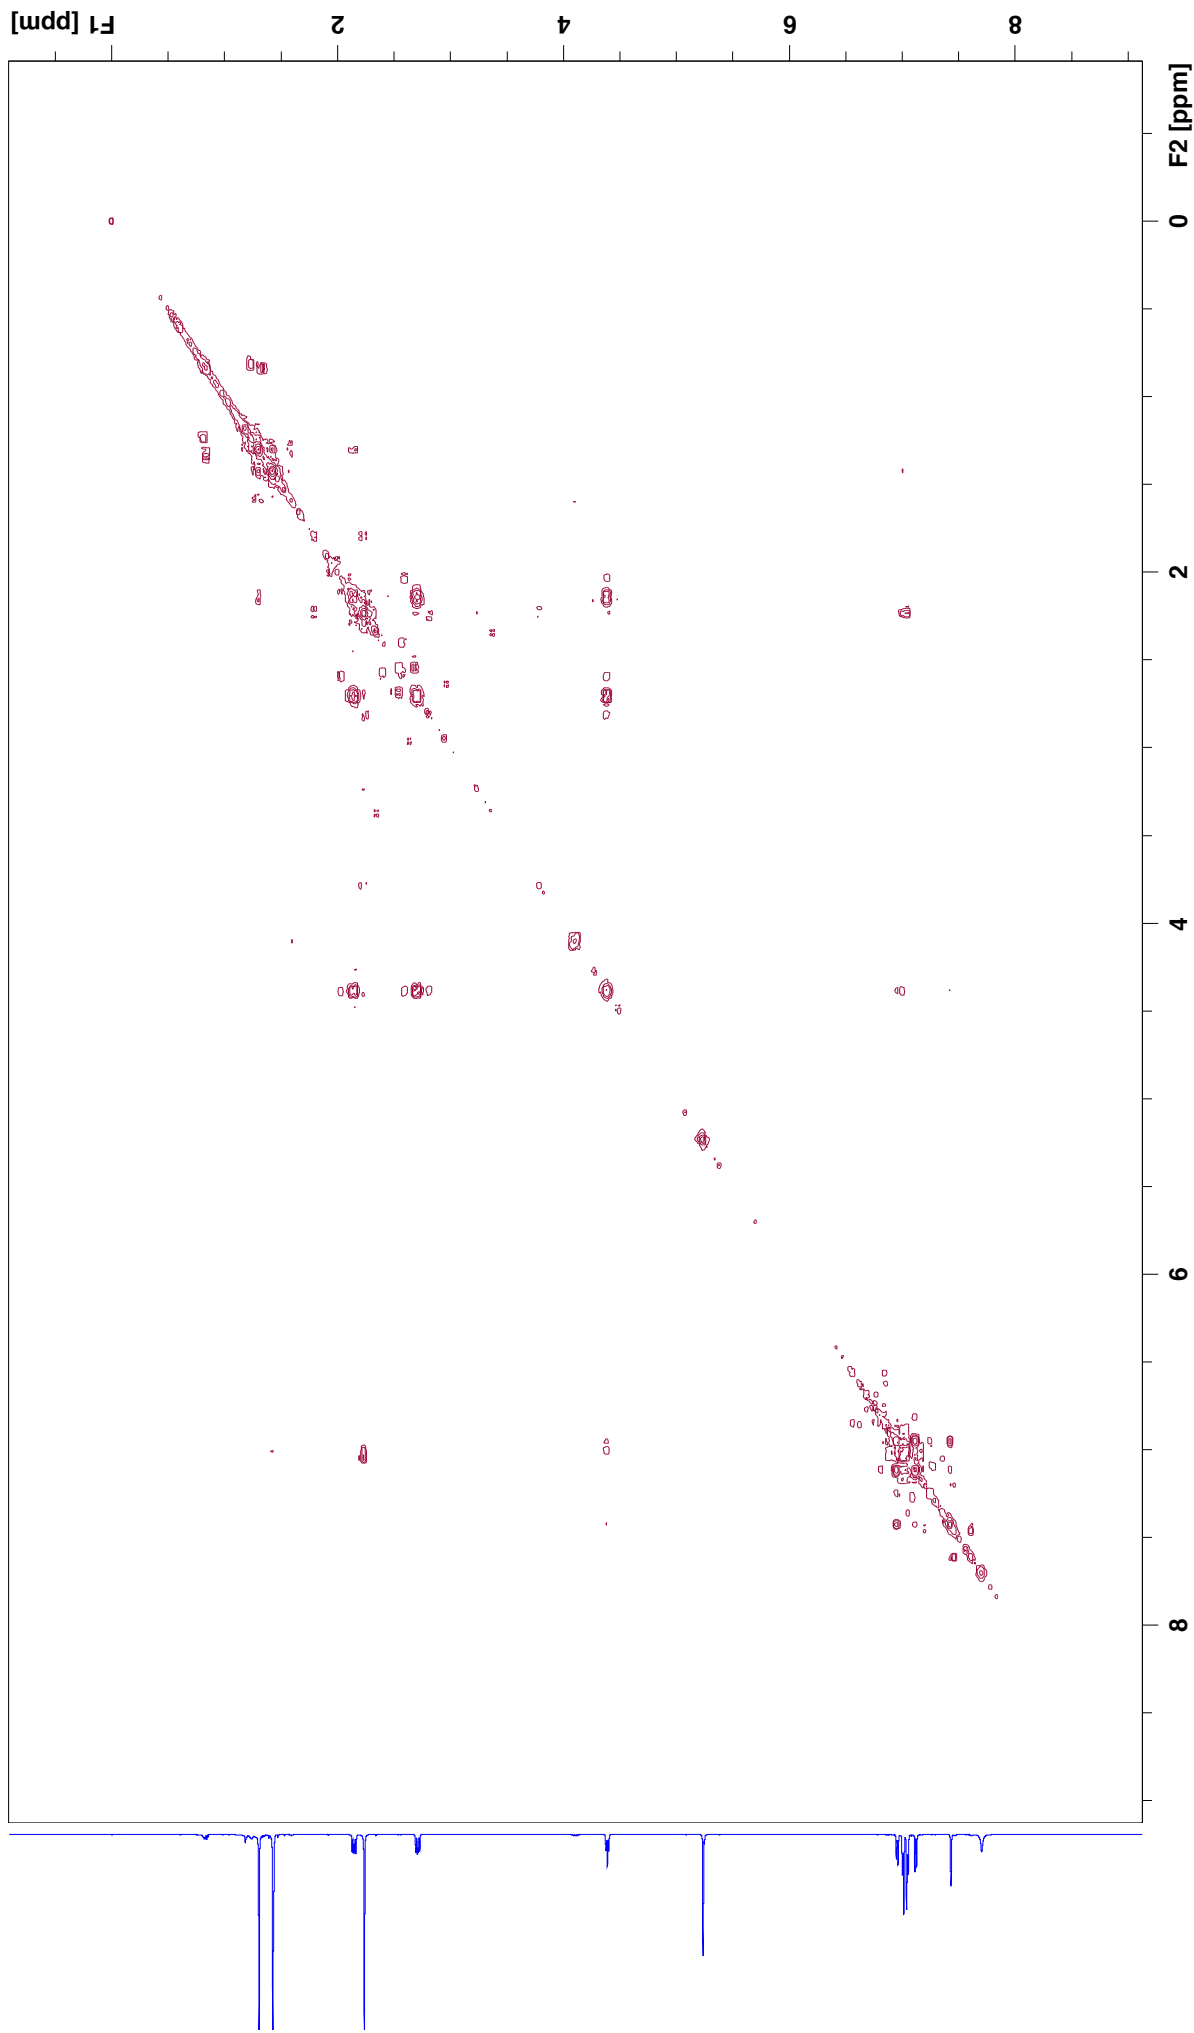

# Structural Data

Date: March 17, 2015

Submitter: Jimmy Wu (Dartmouth)

Sample Reference Number: (-)-JWU-A021

X-ray Number: JW315a

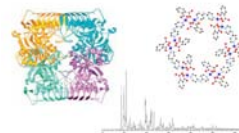

Center Crystallographic for Research  
Michigan State University  
Department of Chemistry  
East Lansing, MI 48824  
**Dr. Richard J. Staples**  
staples@chemistry.msu.edu  
(Shannon M. Biros, PhD)

## Introduction:

Single crystal study to confirm the identity and chirality of the sample submitted. There are eight crystallographically unique molecules of  $C_{16}H_{16}ClN$  in the asymmetric unit. Each molecule is labeled with the same atom numbering scheme, but has a different suffix (a-h). One molecule (f) was disordered over two positions with a 60:40 ratio; its counterpart is labeled with the same atom numbering scheme using a z-suffix. Shown below is a drawing of molecule (c) as a representative example.

The chirality of the compound was established by anomalous dispersion techniques using copper radiation with the use of the Flack parameter and Bayesian statistics of Bijvoet differences. Chiral carbons are labeled in the molecule below; C9 = *S*, C11 = *R*.

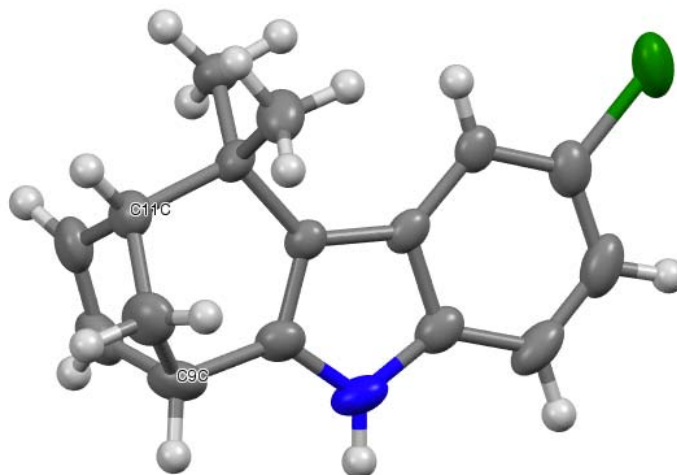

## Experimental Section:

A yellow block crystal with dimensions 0.239 x 0.156 x 0.132 mm was mounted on a Nylon loop using very small amount of paratone oil.

Data were collected using a Bruker CCD (charge coupled device) based diffractometer equipped with an Oxford Cryostream low-temperature apparatus operating at 173 K. Data were measured using omega and phi scans of 1.0° per frame for 10 s. The total number of images was based on results from the program COSMO<sup>1</sup> where redundancy was expected to be 4.0 and completeness of 100% out to 0.83 Å. Cell parameters were retrieved using APEX II software<sup>2</sup> and refined using SAINT on all observed reflections. Data reduction was performed using the SAINT software<sup>3</sup> which corrects for Lp. Scaling and absorption corrections were applied using SADABS<sup>4</sup> multi-scan technique, supplied by George Sheldrick. The structures are solved by the direct method using the SHELXS-97 program and refined by least squares method on F<sup>2</sup>, SHELXL-97<sup>5</sup>, which are incorporated in OLEX2.<sup>6</sup>

The structure was solved in the space group P2<sub>1</sub> (# 4). All non-hydrogen atoms are refined anisotropically. Hydrogens were calculated by geometrical methods and refined as a riding model. The Flack<sup>7</sup> parameter is used to determine chirality of the crystal studied, the value should be near zero, a value of one is the other enantiomer and a value of 0.5 is racemic. The Flack parameter was refined to -0.017(9), confirming the absolute stereochemistry. Determination of absolute structure using Bayesian statistics on Bijvoet differences using the program within Platon<sup>8</sup> also report that we have the correct enantiomer based on this comparison.<sup>9</sup> The crystal used for the diffraction study showed no decomposition during data collection. All drawings are done at 50% ellipsoids.

**Acknowledgement.** The CCD based x-ray diffractometer at Michigan State

University were upgraded and/or replaced by departmental funds.

## References

1. COSMO V1.61, *Software for the CCD Detector Systems for Determining Data Collection Parameters*. Bruker Analytical X-ray Systems, Madison, WI (2009).
2. APEX2 V2010.11-3. *Software for the CCD Detector System*; Bruker Analytical X-ray Systems, Madison, WI (2010).
3. SAINT V 7.68A *Software for the Integration of CCD Detector System* Bruker Analytical X-ray Systems, Madison, WI (2010).
4. SADABS V2.008/2 Program for absorption corrections using Bruker-AXS CCD based on the method of Robert Blessing; Blessing, R.H. *Acta Cryst.* A51, 1995, 33-38.
5. Sheldrick, G.M. "A short history of SHELX". *Acta Cryst.* **A64**, 2008, 112-122.
6. O. V. Dolomanov, L. J. Bourhis, R. J. Gildea, J. A. K. Howard and H. Puschmann, OLEX2: a complete structure solution, refinement and analysis program. *J. Appl. Cryst.* (2009). 42, 339-341.
7. Flack, H. D. *Acta Cryst.* **A39**, 1983, 876-881.
8. Spek, A.L. (2003), *J. Appl. Cryst.* **36**, 7-13.
9. Hooft, R.W.W.; Straver, L.H. & A. L. Spek, A.L.. *J. Appl. Cryst.* **41**, 2008, 96-103

<sup>a</sup> Obtained with graphite monochromated Mo K $\alpha$  ( $\lambda = 0.71073 \text{ \AA}$ ) radiation.

$$^b R_1 = \sum \left| |F_o| - |F_c| \right| / \sum |F_o| \quad ^c wR_2 = \left\{ \frac{\sum [w(F_o^2 - F_c^2)]^2}{\sum [w(F_o^2)]} \right\}^{1/2}.$$

The following are 50% thermal ellipsoidal drawings of one molecule (c) in the asymmetric cell with various amount of labeling.

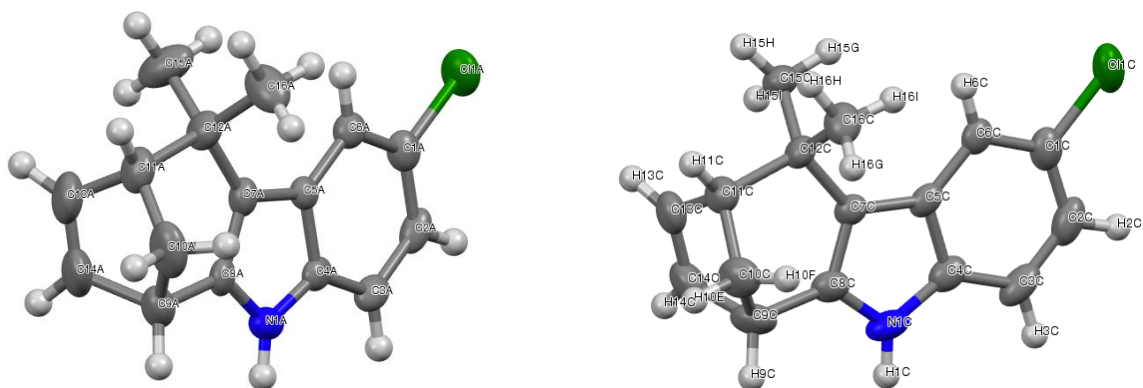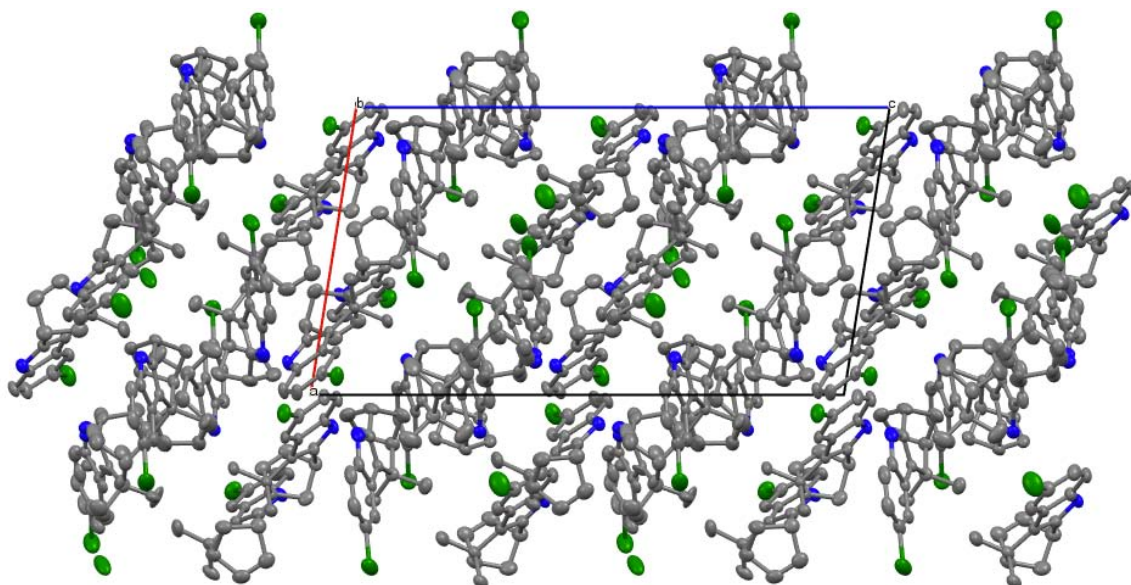

This is a drawing of the packing along the *b*-axis; hydrogen atoms have been omitted for clarity.

Table 1 Crystal data and structure refinement for JW315a.

|                                             |                                                                |
|---------------------------------------------|----------------------------------------------------------------|
| Identification code                         | JW315a                                                         |
| Empirical formula                           | C <sub>16</sub> H <sub>16</sub> ClN                            |
| Formula weight                              | 257.75                                                         |
| Temperature/K                               | 173.0                                                          |
| Crystal system                              | monoclinic                                                     |
| Space group                                 | P2 <sub>1</sub>                                                |
| a/Å                                         | 12.4101(3)                                                     |
| b/Å                                         | 18.9939(3)                                                     |
| c/Å                                         | 22.7815(4)                                                     |
| α/°                                         | 90                                                             |
| β/°                                         | 99.0520(10)                                                    |
| γ/°                                         | 90                                                             |
| Volume/Å <sup>3</sup>                       | 5303.09(18)                                                    |
| Z                                           | 16                                                             |
| ρ <sub>calc</sub> /cm <sup>3</sup>          | 1.291                                                          |
| μ/mm <sup>-1</sup>                          | 2.372                                                          |
| F(000)                                      | 2176.0                                                         |
| Crystal size/mm <sup>3</sup>                | 0.239 × 0.156 × 0.132                                          |
| Radiation                                   | CuKα (λ = 1.54178)                                             |
| 2θ range for data collection/°              | 3.928 to 144.904                                               |
| Index ranges                                | -15 ≤ h ≤ 15, -23 ≤ k ≤ 23, -28 ≤ l ≤ 28                       |
| Reflections collected                       | 66305                                                          |
| Independent reflections                     | 20467 [R <sub>int</sub> = 0.0891, R <sub>sigma</sub> = 0.0731] |
| Data/restraints/parameters                  | 20467/522/1477                                                 |
| Goodness-of-fit on F <sup>2</sup>           | 1.009                                                          |
| Final R indexes [I ≥ 2σ (I)]                | R <sub>1</sub> = 0.0522, wR <sub>2</sub> = 0.1151              |
| Final R indexes [all data]                  | R <sub>1</sub> = 0.0758, wR <sub>2</sub> = 0.1280              |
| Largest diff. peak/hole / e Å <sup>-3</sup> | 0.49/-0.54                                                     |
| Flack parameter                             | 0.017(9)                                                       |

Table 2 Fractional Atomic Coordinates (×10<sup>4</sup>) and Equivalent Isotropic Displacement Parameters (Å<sup>2</sup>×10<sup>3</sup>) for JW315a. U<sub>eq</sub> is defined as 1/3 of the trace of the orthogonalised U<sub>ij</sub> tensor.

| Atom | x          | y         | z         | U(eq)    |
|------|------------|-----------|-----------|----------|
| Cl1A | 3006.9(13) | 6780.1(8) | 2095.4(7) | 49.6(4)  |
| N1A  | -1227(3)   | 5354(2)   | 1701(2)   | 36.9(10) |
| C1A  | 1708(5)    | 6368(3)   | 1963(2)   | 36.0(12) |
| C2A  | 812(5)     | 6774(3)   | 1713(2)   | 36.7(12) |

|      |            |           |           |          |
|------|------------|-----------|-----------|----------|
| C3A  | -212(5)    | 6477(3)   | 1609(2)   | 36.0(12) |
| C4A  | -316(4)    | 5770(3)   | 1756(2)   | 30.3(11) |
| C5A  | 588(4)     | 5359(3)   | 2012(2)   | 27.5(10) |
| C6A  | 1625(4)    | 5675(3)   | 2116(2)   | 32.6(11) |
| C7A  | 167(4)     | 4664(3)   | 2104(2)   | 32.8(11) |
| C8A  | -930(4)    | 4695(3)   | 1914(2)   | 32.3(11) |
| C9A  | -1679(5)   | 4083(3)   | 1951(3)   | 46.9(14) |
| C10A | -976(6)    | 3413(4)   | 1821(3)   | 63(2)    |
| C11A | -146(5)    | 3419(3)   | 2391(3)   | 47.0(14) |
| C12A | 736(5)     | 4001(3)   | 2366(3)   | 41.9(13) |
| C13A | -839(6)    | 3597(4)   | 2847(3)   | 66.6(19) |
| C14A | -1686(6)   | 3943(4)   | 2607(3)   | 67(2)    |
| C15A | 1348(7)    | 4161(4)   | 2995(3)   | 68(2)    |
| C16A | 1558(6)    | 3739(3)   | 1985(4)   | 61.0(19) |
| C11B | 6660.4(14) | 7221.4(8) | 1166.4(7) | 53.5(4)  |
| N1B  | 6521(4)    | 4347(2)   | 264(2)    | 37.8(10) |
| C1B  | 6680(5)    | 6365(3)   | 889(2)    | 37.2(12) |
| C2B  | 7239(4)    | 6235(3)   | 415(2)    | 38.7(13) |
| C3B  | 7250(4)    | 5565(3)   | 183(2)    | 37.8(12) |
| C4B  | 6676(4)    | 5040(3)   | 423(2)    | 33.0(11) |
| C5B  | 6096(4)    | 5165(3)   | 902(2)    | 28.8(10) |
| C6B  | 6122(4)    | 5849(3)   | 1139(2)   | 32.7(11) |
| C7B  | 5582(4)    | 4513(3)   | 1017(2)   | 30.5(10) |
| C8B  | 5860(4)    | 4042(3)   | 625(2)    | 32.7(11) |
| C9B  | 5443(5)    | 3293(3)   | 588(3)    | 42.9(13) |
| C10B | 5386(5)    | 3093(3)   | 1235(3)   | 43.0(13) |
| C11B | 4421(4)    | 3560(3)   | 1346(3)   | 40.4(13) |
| C12B | 4795(4)    | 4346(3)   | 1447(2)   | 36.6(12) |
| C13B | 3671(5)    | 3464(3)   | 757(3)    | 46.5(14) |
| C14B | 4234(5)    | 3305(3)   | 330(3)    | 47.4(14) |
| C15B | 3812(5)    | 4848(3)   | 1334(3)   | 48.5(15) |
| C16B | 5354(6)    | 4429(4)   | 2096(3)   | 54.0(16) |
| C11C | 4016.6(14) | 3823.9(9) | 8376.9(8) | 55.4(4)  |
| N1C  | 8621(4)    | 4598(3)   | 8996(2)   | 42.1(11) |
| C1C  | 5417(5)    | 4010(3)   | 8569(3)   | 41.8(13) |
| C2C  | 6110(6)    | 3497(3)   | 8841(3)   | 48.7(15) |
| C3C  | 7203(6)    | 3636(3)   | 9002(3)   | 47.3(15) |
| C4C  | 7589(5)    | 4309(3)   | 8885(2)   | 36.7(12) |
| C5C  | 6883(4)    | 4826(3)   | 8590(2)   | 31.0(11) |
| C6C  | 5772(4)    | 4668(3)   | 8429(2)   | 32.3(11) |
| C7C  | 7539(4)    | 5439(3)   | 8525(2)   | 29.1(10) |
| C8C  | 8581(4)    | 5273(3)   | 8774(2)   | 36.5(12) |

|      |            |           |            |          |
|------|------------|-----------|------------|----------|
| C9C  | 9506(5)    | 5790(4)   | 8815(3)    | 48.8(15) |
| C10C | 9284(5)    | 6197(4)   | 8222(3)    | 51.0(16) |
| C11C | 8288(5)    | 6623(3)   | 8320(3)    | 41.1(12) |
| C12C | 7237(4)    | 6142(3)   | 8229(2)    | 33.8(11) |
| C13C | 8615(5)    | 6835(3)   | 8961(3)    | 47.2(14) |
| C14C | 9298(5)    | 6370(3)   | 9242(3)    | 51.5(15) |
| C15C | 6335(4)    | 6503(3)   | 8512(3)    | 41.6(13) |
| C16C | 6831(5)    | 6042(3)   | 7572(3)    | 46.4(14) |
| C11D | 6895(2)    | 450.6(9)  | 6189.5(11) | 82.8(7)  |
| N1D  | 6318(4)    | 3322(3)   | 5309(2)    | 40.8(11) |
| C1D  | 6716(5)    | 1308(3)   | 5902(3)    | 43.8(14) |
| C2D  | 7296(5)    | 1484(4)   | 5449(3)    | 48.1(15) |
| C3D  | 7199(5)    | 2152(4)   | 5218(2)    | 44.1(14) |
| C4D  | 6539(4)    | 2628(3)   | 5455(2)    | 36.2(12) |
| C5D  | 5941(4)    | 2448(3)   | 5915(2)    | 31.7(11) |
| C6D  | 6049(5)    | 1760(3)   | 6147(2)    | 39.1(12) |
| C7D  | 5330(4)    | 3061(3)   | 6029(2)    | 31.9(11) |
| C8D  | 5582(4)    | 3572(3)   | 5654(2)    | 37.1(12) |
| C9D  | 5155(5)    | 4311(3)   | 5660(3)    | 47.4(14) |
| C10D | 3967(5)    | 4229(4)   | 5774(3)    | 53.2(16) |
| C11D | 4184(5)    | 3967(3)   | 6423(3)    | 46.0(14) |
| C12D | 4509(4)    | 3175(3)   | 6454(3)    | 37.7(12) |
| C13D | 5137(5)    | 4429(3)   | 6675(3)    | 48.6(14) |
| C14D | 5678(5)    | 4633(3)   | 6253(3)    | 48.7(15) |
| C15D | 4994(5)    | 2967(3)   | 7094(3)    | 47.5(14) |
| C16D | 3495(5)    | 2721(3)   | 6252(3)    | 46.5(15) |
| C11E | 9334.9(17) | 9852.4(8) | 5388.4(8)  | 59.8(4)  |
| N1E  | 8997(4)    | 6959(2)   | 4509(2)    | 36.8(10) |
| C1E  | 9243(5)    | 8986(3)   | 5105(3)    | 41.5(13) |
| C2E  | 9844(5)    | 8828(3)   | 4650(3)    | 45.6(14) |
| C3E  | 9799(5)    | 8154(3)   | 4421(3)    | 40.6(13) |
| C4E  | 9173(4)    | 7656(3)   | 4655(2)    | 31.7(11) |
| C5E  | 8556(4)    | 7813(3)   | 5116(2)    | 30.5(11) |
| C6E  | 8613(4)    | 8506(3)   | 5343(2)    | 33.7(11) |
| C7E  | 8002(4)    | 7183(3)   | 5232(2)    | 29.6(10) |
| C8E  | 8283(4)    | 6681(3)   | 4853(2)    | 34.6(11) |
| C9E  | 7855(5)    | 5942(3)   | 4831(3)    | 46.9(14) |
| C10E | 7746(5)    | 5767(3)   | 5476(3)    | 49.4(15) |
| C11E | 6794(5)    | 6259(3)   | 5562(3)    | 45.3(14) |
| C12E | 7194(4)    | 7039(3)   | 5651(3)    | 39.2(13) |
| C13E | 6058(5)    | 6152(3)   | 4972(3)    | 50.6(15) |
| C14E | 6647(5)    | 5979(3)   | 4561(3)    | 51.1(15) |



|      |            |            |            |          |
|------|------------|------------|------------|----------|
| C15E | 6210(5)    | 7544(3)    | 5512(3)    | 48.8(15) |
| C16E | 7728(5)    | 7147(4)    | 6303(3)    | 53.7(16) |
| C11F | 5156(3)    | 9335.4(17) | 6338.3(13) | 70.9(9)  |
| N1F  | 1135(11)   | 7702(7)    | 5878(9)    | 40(3)    |
| C1F  | 3937(10)   | 8869(6)    | 6224(6)    | 40(2)    |
| C2F  | 3038(11)   | 9222(6)    | 5892(6)    | 49(3)    |
| C3F  | 2043(10)   | 8872(5)    | 5764(5)    | 44(2)    |
| C4F  | 1993(11)   | 8175(5)    | 5951(6)    | 31(3)    |
| C5F  | 2890(12)   | 7837(9)    | 6292(14)   | 32(3)    |
| C6F  | 3882(8)    | 8199(5)    | 6422(5)    | 33(2)    |
| C7F  | 2523(13)   | 7148(7)    | 6441(10)   | 28(4)    |
| C8F  | 1482(13)   | 7074(8)    | 6143(11)   | 33(3)    |
| C9F  | 823(11)    | 6434(7)    | 6158(7)    | 37(3)    |
| C10F | 1643(14)   | 5820(9)    | 6120(8)    | 48(4)    |
| C11F | 2351(13)   | 5894(8)    | 6736(8)    | 46(3)    |
| C12F | 3141(13)   | 6536(8)    | 6759(9)    | 40(4)    |
| C13F | 1466(16)   | 6017(13)   | 7103(8)    | 46(4)    |
| C14F | 611(16)    | 6326(9)    | 6793(8)    | 42(4)    |
| C15F | 3560(20)   | 6730(15)   | 7419(8)    | 67(7)    |
| C16F | 4123(18)   | 6338(11)   | 6446(12)   | 55(5)    |
| C11Z | 5933(4)    | 8893(3)    | 6606(2)    | 69.1(14) |
| N1Z  | 1442(14)   | 7916(9)    | 5918(11)   | 36(4)    |
| C1Z  | 4560(12)   | 8643(8)    | 6401(7)    | 45(3)    |
| C2Z  | 3807(17)   | 9122(9)    | 6083(10)   | 48(4)    |
| C3Z  | 2733(16)   | 8935(8)    | 5909(8)    | 42(4)    |
| C4Z  | 2441(15)   | 8245(9)    | 6047(11)   | 36(4)    |
| C5Z  | 3192(16)   | 7782(12)   | 6372(19)   | 29(4)    |
| C6Z  | 4272(13)   | 7982(8)    | 6547(9)    | 41(4)    |
| C7Z  | 2625(18)   | 7123(11)   | 6388(18)   | 33(6)    |
| C8Z  | 1564(18)   | 7245(11)   | 6158(19)   | 33(5)    |
| C9Z  | 720(19)    | 6693(11)   | 6139(12)   | 50(6)    |
| C10Z | 1310(20)   | 5996(12)   | 6052(11)   | 52(6)    |
| C11Z | 2052(19)   | 5930(14)   | 6657(13)   | 57(6)    |
| C12Z | 3039(19)   | 6441(12)   | 6691(12)   | 37(5)    |
| C13Z | 1270(30)   | 6160(20)   | 7059(14)   | 62(8)    |
| C14Z | 520(30)    | 6573(14)   | 6776(15)   | 54(7)    |
| C15Z | 3550(20)   | 6590(20)   | 7343(12)   | 52(7)    |
| C16Z | 3940(30)   | 6137(16)   | 6362(18)   | 53(7)    |
| C11G | 3039.4(14) | 1003.8(9)  | 7182.2(8)  | 61.1(4)  |
| N1G  | -1298(3)   | 2261(2)    | 6715.6(19) | 33.9(10) |
| C1G  | 1712(5)    | 1354(3)    | 7035(3)    | 42.4(14) |
| C2G  | 885(5)     | 923(3)     | 6759(3)    | 44.8(14) |

|      |           |           |             |          |
|------|-----------|-----------|-------------|----------|
| C3G  | -170(5)   | 1188(3)   | 6634(2)     | 40.6(13) |
| C4G  | -353(4)   | 1881(3)   | 6787(2)     | 33.4(12) |
| C5G  | 495(4)    | 2324(3)   | 7072(2)     | 29.2(10) |
| C6G  | 1560(5)   | 2043(3)   | 7199(2)     | 35.8(12) |
| C7G  | 2(4)      | 2983(3)   | 7166(2)     | 28.8(10) |
| C8G  | -1082(4)  | 2918(3)   | 6949(2)     | 30.5(11) |
| C9G  | -1893(4)  | 3507(3)   | 6938(2)     | 36.8(12) |
| C10G | -1518(5)  | 3900(3)   | 7528(3)     | 41.8(13) |
| C11G | -449(5)   | 4228(3)   | 7395(2)     | 36.7(12) |
| C12G | 477(4)    | 3666(3)   | 7444(2)     | 31.5(11) |
| C13G | -806(4)   | 4463(3)   | 6754(3)     | 38.0(12) |
| C14G | -1617(4)  | 4055(3)   | 6497(2)     | 36.4(11) |
| C15G | 1415(4)   | 3929(3)   | 7135(2)     | 38.2(12) |
| C16G | 926(5)    | 3545(3)   | 8109(2)     | 45.1(13) |
| C11H | 644.6(13) | 2852.4(7) | 9559.9(6)   | 45.4(3)  |
| N1H  | 1106(4)   | 5702(2)   | 10517.4(19) | 33.8(10) |
| C1H  | 743(4)    | 3712(3)   | 9848(2)     | 31.4(11) |
| C2H  | 86(5)     | 3883(3)   | 10263(2)    | 39.3(13) |
| C3H  | 143(5)    | 4551(3)   | 10515(2)    | 38.4(13) |
| C4H  | 876(4)    | 5024(3)   | 10333(2)    | 31.3(11) |
| C5H  | 1540(4)   | 4860(3)   | 9899(2)     | 27.9(10) |
| C6H  | 1474(4)   | 4181(3)   | 9654(2)     | 29.8(10) |
| C7H  | 2180(4)   | 5479(3)   | 9836(2)     | 28.2(10) |
| C8H  | 1891(4)   | 5964(3)   | 10224(2)    | 32.4(11) |
| C9H  | 2393(5)   | 6686(3)   | 10296(3)    | 36.9(12) |
| C10H | 3596(5)   | 6580(3)   | 10223(3)    | 42.9(13) |
| C11H | 3439(4)   | 6410(3)   | 9552(3)     | 36.4(12) |
| C12H | 3037(4)   | 5629(3)   | 9437(2)     | 30.8(11) |
| C13H | 2555(5)   | 6937(3)   | 9324(3)     | 43.1(13) |
| C14H | 1975(5)   | 7100(3)   | 9732(3)     | 45.0(14) |
| C15H | 2562(4)   | 5532(3)   | 8778(2)     | 37.6(12) |
| C16H | 4023(4)   | 5134(3)   | 9599(2)     | 37.4(12) |

Table 3 Anisotropic Displacement Parameters ( $\text{\AA}^2 \times 10^3$ ) for JW315a. The Anisotropic displacement factor exponent takes the form:  $-2\pi^2[h^2a^*{}^2U_{11}+2hka^*b^*U_{12}+\dots]$ .

| Atom | $U_{11}$ | $U_{22}$ | $U_{33}$ | $U_{23}$ | $U_{13}$ | $U_{12}$ |
|------|----------|----------|----------|----------|----------|----------|
| C11A | 55.0(8)  | 39.7(7)  | 54.4(9)  | -4.5(6)  | 9.6(7)   | -21.8(6) |
| N1A  | 32(2)    | 47(3)    | 32(2)    | 0(2)     | 4.5(18)  | 2(2)     |
| C1A  | 46(3)    | 34(3)    | 30(3)    | -10(2)   | 11(2)    | -7(2)    |
| C2A  | 66(4)    | 20(2)    | 26(3)    | -3(2)    | 13(2)    | 0(2)     |
| C3A  | 46(3)    | 34(3)    | 30(3)    | -1(2)    | 10(2)    | 12(2)    |
| C4A  | 37(3)    | 35(3)    | 19(2)    | -2(2)    | 8(2)     | 5(2)     |

|      |          |         |          |          |         |          |
|------|----------|---------|----------|----------|---------|----------|
| C5A  | 31(2)    | 30(3)   | 23(2)    | -3.5(19) | 8.8(19) | 0.1(19)  |
| C6A  | 40(3)    | 30(3)   | 29(3)    | -3(2)    | 8(2)    | 1(2)     |
| C7A  | 43(3)    | 30(3)   | 28(3)    | 0(2)     | 10(2)   | -6(2)    |
| C8A  | 42(3)    | 35(3)   | 21(2)    | 1(2)     | 11(2)   | -4(2)    |
| C9A  | 45(3)    | 56(4)   | 41(3)    | 2(3)     | 10(3)   | -14(3)   |
| C10A | 75(5)    | 51(4)   | 65(4)    | -5(3)    | 23(4)   | -35(4)   |
| C11A | 62(4)    | 35(3)   | 47(3)    | 8(3)     | 14(3)   | -7(3)    |
| C12A | 49(3)    | 30(3)   | 45(3)    | 9(2)     | 4(3)    | -5(2)    |
| C13A | 75(5)    | 73(5)   | 55(4)    | 24(4)    | 23(4)   | -13(4)   |
| C14A | 58(4)    | 90(6)   | 56(4)    | 22(4)    | 18(3)   | -23(4)   |
| C15A | 82(5)    | 46(4)   | 66(5)    | 12(3)    | -24(4)  | -1(3)    |
| C16A | 57(4)    | 33(3)   | 99(6)    | 9(3)     | 29(4)   | 6(3)     |
| Cl1B | 70.3(10) | 29.7(7) | 57.5(9)  | -2.9(6)  | 0.4(7)  | -8.5(6)  |
| N1B  | 40(2)    | 36(2)   | 41(3)    | -3(2)    | 17(2)   | 2.9(19)  |
| C1B  | 45(3)    | 32(3)   | 33(3)    | 1(2)     | -2(2)   | -4(2)    |
| C2B  | 37(3)    | 41(3)   | 38(3)    | 10(2)    | 3(2)    | -9(2)    |
| C3B  | 36(3)    | 45(3)   | 34(3)    | 5(2)     | 12(2)   | -8(2)    |
| C4B  | 34(3)    | 38(3)   | 28(3)    | 0(2)     | 5(2)    | 1(2)     |
| C5B  | 27(2)    | 33(3)   | 26(2)    | 3(2)     | 2.9(19) | 0.0(19)  |
| C6B  | 32(2)    | 34(3)   | 32(3)    | -3(2)    | 4(2)    | -1(2)    |
| C7B  | 28(2)    | 33(3)   | 30(3)    | 1(2)     | 4.7(19) | -2(2)    |
| C8B  | 31(2)    | 30(3)   | 38(3)    | -3(2)    | 6(2)    | 1(2)     |
| C9B  | 50(3)    | 28(3)   | 51(3)    | -5(2)    | 9(3)    | 5(2)     |
| C10B | 39(3)    | 33(3)   | 58(4)    | 10(3)    | 8(3)    | -1(2)    |
| C11B | 37(3)    | 36(3)   | 49(3)    | 9(2)     | 11(2)   | -6(2)    |
| C12B | 34(3)    | 40(3)   | 37(3)    | 0(2)     | 11(2)   | -5(2)    |
| C13B | 38(3)    | 35(3)   | 64(4)    | 8(3)     | 3(3)    | -9(2)    |
| C14B | 53(3)    | 32(3)   | 54(4)    | -5(2)    | 1(3)    | -7(2)    |
| C15B | 46(3)    | 39(3)   | 68(4)    | 1(3)     | 32(3)   | 0(3)     |
| C16B | 64(4)    | 69(4)   | 32(3)    | -2(3)    | 17(3)   | -14(3)   |
| Cl1C | 58.3(9)  | 49.5(9) | 62.4(10) | -19.5(8) | 22.0(8) | -20.7(7) |
| N1C  | 47(3)    | 42(3)   | 39(3)    | 11(2)    | 12(2)   | 19(2)    |
| C1C  | 52(3)    | 40(3)   | 37(3)    | -9(2)    | 19(3)   | -9(3)    |
| C2C  | 78(4)    | 31(3)   | 42(3)    | -5(2)    | 25(3)   | -6(3)    |
| C3C  | 77(4)    | 31(3)   | 37(3)    | 7(2)     | 20(3)   | 13(3)    |
| C4C  | 50(3)    | 35(3)   | 29(3)    | 3(2)     | 16(2)   | 8(2)     |
| C5C  | 44(3)    | 27(2)   | 25(2)    | 0(2)     | 14(2)   | 6(2)     |
| C6C  | 43(3)    | 30(3)   | 26(2)    | -7(2)    | 12(2)   | 1(2)     |
| C7C  | 33(2)    | 29(2)   | 27(2)    | 3(2)     | 12(2)   | 3(2)     |
| C8C  | 36(3)    | 41(3)   | 35(3)    | 3(2)     | 13(2)   | 8(2)     |
| C9C  | 30(3)    | 62(4)   | 56(4)    | 14(3)    | 11(2)   | 8(2)     |
| C10C | 44(3)    | 55(4)   | 59(4)    | 11(3)    | 22(3)   | -5(3)    |

|      |           |         |          |          |          |          |
|------|-----------|---------|----------|----------|----------|----------|
| C11C | 41(3)     | 35(3)   | 48(3)    | 8(2)     | 10(2)    | -5(2)    |
| C12C | 39(3)     | 25(2)   | 38(3)    | 4(2)     | 7(2)     | 2(2)     |
| C13C | 46(3)     | 41(3)   | 54(4)    | -4(3)    | 7(3)     | -17(3)   |
| C14C | 40(3)     | 61(4)   | 52(4)    | 2(3)     | 1(3)     | -16(3)   |
| C15C | 37(3)     | 35(3)   | 51(3)    | -1(2)    | 4(2)     | 7(2)     |
| C16C | 58(4)     | 42(3)   | 37(3)    | 10(3)    | 2(3)     | -5(3)    |
| C11D | 125.0(18) | 33.8(9) | 97.8(16) | 8.2(9)   | 43.2(14) | 12.2(10) |
| N1D  | 41(2)     | 50(3)   | 34(2)    | 10(2)    | 15(2)    | 3(2)     |
| C1D  | 51(3)     | 32(3)   | 47(3)    | -1(3)    | 4(3)     | 1(3)     |
| C2D  | 56(4)     | 50(4)   | 39(3)    | -8(3)    | 7(3)     | 14(3)    |
| C3D  | 48(3)     | 59(4)   | 27(3)    | 2(3)     | 11(2)    | 8(3)     |
| C4D  | 38(3)     | 40(3)   | 31(3)    | 0(2)     | 8(2)     | 3(2)     |
| C5D  | 29(2)     | 38(3)   | 29(3)    | -4(2)    | 6(2)     | -2(2)    |
| C6D  | 45(3)     | 39(3)   | 33(3)    | -6(2)    | 6(2)     | -6(2)    |
| C7D  | 32(2)     | 34(3)   | 30(3)    | -1(2)    | 6(2)     | -4(2)    |
| C8D  | 33(3)     | 42(3)   | 36(3)    | -3(2)    | 4(2)     | 2(2)     |
| C9D  | 48(3)     | 41(3)   | 55(4)    | 8(3)     | 10(3)    | 6(3)     |
| C10D | 43(3)     | 48(4)   | 67(4)    | 2(3)     | 4(3)     | 12(3)    |
| C11D | 37(3)     | 47(3)   | 57(4)    | -11(3)   | 16(3)    | -1(2)    |
| C12D | 37(3)     | 41(3)   | 38(3)    | -9(2)    | 14(2)    | -2(2)    |
| C13D | 51(3)     | 35(3)   | 62(4)    | -16(3)   | 17(3)    | 1(2)     |
| C14D | 46(3)     | 33(3)   | 69(4)    | -4(3)    | 15(3)    | 3(2)     |
| C15D | 46(3)     | 59(4)   | 41(3)    | -12(3)   | 16(2)    | -3(3)    |
| C16D | 41(3)     | 54(4)   | 47(3)    | -12(3)   | 17(3)    | -9(3)    |
| C11E | 90.9(12)  | 31.5(7) | 63.9(10) | -7.1(7)  | 33.5(9)  | -3.4(8)  |
| N1E  | 43(2)     | 35(2)   | 35(2)    | -4.7(19) | 12(2)    | 3.0(19)  |
| C1E  | 57(3)     | 32(3)   | 38(3)    | -1(2)    | 15(3)    | -4(3)    |
| C2E  | 61(4)     | 40(3)   | 40(3)    | 2(3)     | 23(3)    | -8(3)    |
| C3E  | 50(3)     | 42(3)   | 34(3)    | -1(2)    | 22(3)    | -5(3)    |
| C4E  | 33(3)     | 33(3)   | 30(3)    | -2(2)    | 8(2)     | 2(2)     |
| C5E  | 33(2)     | 33(3)   | 25(2)    | 3(2)     | 3.8(19)  | 0(2)     |
| C6E  | 40(3)     | 32(3)   | 31(3)    | -2(2)    | 11(2)    | 5(2)     |
| C7E  | 33(2)     | 30(3)   | 25(2)    | 3(2)     | 2.1(19)  | 2(2)     |
| C8E  | 37(3)     | 34(3)   | 33(3)    | 5(2)     | 6(2)     | 0(2)     |
| C9E  | 51(3)     | 34(3)   | 56(4)    | 1(3)     | 8(3)     | -4(2)    |
| C10E | 48(3)     | 38(3)   | 61(4)    | 16(3)    | 4(3)     | -2(3)    |
| C11E | 40(3)     | 45(3)   | 51(4)    | 20(3)    | 9(3)     | -6(2)    |
| C12E | 38(3)     | 42(3)   | 39(3)    | 10(2)    | 13(2)    | 1(2)     |
| C13E | 44(3)     | 44(3)   | 62(4)    | 14(3)    | 1(3)     | -10(3)   |
| C14E | 57(4)     | 37(3)   | 56(4)    | 5(3)     | -2(3)    | -12(3)   |
| C15E | 39(3)     | 55(4)   | 56(4)    | 12(3)    | 20(3)    | 3(3)     |
| C16E | 59(4)     | 70(4)   | 35(3)    | 10(3)    | 18(3)    | -3(3)    |

|      |          |          |          |          |          |           |
|------|----------|----------|----------|----------|----------|-----------|
| C11F | 85(2)    | 71.3(19) | 59.6(16) | -9.6(14) | 21.3(15) | -50.0(17) |
| N1F  | 33(6)    | 48(7)    | 36(5)    | 2(6)     | 1(5)     | -2(4)     |
| C1F  | 59(6)    | 31(6)    | 33(7)    | -3(5)    | 16(5)    | -12(5)    |
| C2F  | 75(7)    | 34(6)    | 40(6)    | 7(5)     | 11(6)    | -8(5)     |
| C3F  | 55(6)    | 39(5)    | 38(5)    | 4(4)     | 7(5)     | 10(5)     |
| C4F  | 32(8)    | 34(5)    | 28(6)    | 1(5)     | 9(7)     | -2(5)     |
| C5F  | 33(7)    | 33(6)    | 29(8)    | -1(5)    | 6(7)     | -2(6)     |
| C6F  | 34(5)    | 40(6)    | 25(5)    | 4(4)     | 4(4)     | -11(4)    |
| C7F  | 40(7)    | 30(6)    | 14(5)    | 0(5)     | 5(6)     | -6(5)     |
| C8F  | 39(6)    | 39(7)    | 21(6)    | 3(7)     | 3(4)     | -3(5)     |
| C9F  | 39(6)    | 38(7)    | 32(5)    | -2(6)    | -3(4)    | -14(5)    |
| C10F | 64(9)    | 38(7)    | 45(7)    | -4(6)    | 14(6)    | -7(6)     |
| C11F | 59(8)    | 38(6)    | 41(7)    | 8(5)     | 7(5)     | 3(5)      |
| C12F | 45(7)    | 36(7)    | 38(9)    | 11(6)    | 5(5)     | -2(5)     |
| C13F | 58(8)    | 39(9)    | 41(6)    | 15(5)    | 8(5)     | -10(7)    |
| C14F | 39(7)    | 54(11)   | 33(6)    | 4(7)     | 7(5)     | -19(7)    |
| C15F | 91(14)   | 72(11)   | 27(7)    | 15(7)    | -24(7)   | 6(10)     |
| C16F | 60(9)    | 39(11)   | 69(11)   | 9(8)     | 16(8)    | 15(7)     |
| C11Z | 81(3)    | 67(3)    | 67(3)    | -30(2)   | 36(2)    | -49(3)    |
| N1Z  | 28(10)   | 40(11)   | 39(9)    | 17(11)   | 9(10)    | 10(6)     |
| C1Z  | 54(8)    | 39(8)    | 47(9)    | -8(7)    | 20(7)    | -6(7)     |
| C2Z  | 86(9)    | 21(8)    | 40(10)   | -2(7)    | 22(7)    | -14(7)    |
| C3Z  | 70(10)   | 26(8)    | 35(8)    | 5(8)     | 21(9)    | 9(8)      |
| C4Z  | 34(10)   | 31(7)    | 42(11)   | -4(6)    | 4(9)     | -2(7)     |
| C5Z  | 36(10)   | 28(7)    | 25(12)   | -4(6)    | 12(10)   | 7(7)      |
| C6Z  | 46(8)    | 31(8)    | 42(10)   | 1(7)     | -1(8)    | -7(6)     |
| C7Z  | 24(7)    | 35(8)    | 45(14)   | -4(8)    | 22(7)    | 11(5)     |
| C8Z  | 40(9)    | 25(9)    | 37(11)   | -1(9)    | 12(8)    | 0(6)      |
| C9Z  | 54(10)   | 53(13)   | 45(9)    | -1(11)   | 13(7)    | -18(9)    |
| C10Z | 67(15)   | 43(12)   | 49(10)   | -4(10)   | 19(10)   | -40(11)   |
| C11Z | 62(12)   | 52(11)   | 61(14)   | 17(10)   | 21(10)   | -11(8)    |
| C12Z | 46(10)   | 35(9)    | 27(10)   | 0(7)     | -1(7)    | 9(8)      |
| C13Z | 82(17)   | 57(19)   | 55(12)   | 18(11)   | 32(13)   | 3(13)     |
| C14Z | 45(10)   | 54(17)   | 64(11)   | 3(11)    | 14(9)    | -16(10)   |
| C15Z | 29(10)   | 80(18)   | 50(11)   | 5(10)    | 15(8)    | 0(9)      |
| C16Z | 55(13)   | 35(16)   | 73(14)   | 7(12)    | 18(12)   | 17(11)    |
| C11G | 65.2(10) | 61(1)    | 57.4(9)  | 16.0(8)  | 10.5(8)  | 32.6(8)   |
| N1G  | 35(2)    | 32(2)    | 36(2)    | -3.2(19) | 7.0(18)  | -10.9(18) |
| C1G  | 50(3)    | 42(3)    | 37(3)    | 11(2)    | 11(3)    | 14(3)     |
| C2G  | 72(4)    | 27(3)    | 39(3)    | 8(2)     | 22(3)    | 6(3)      |
| C3G  | 67(4)    | 24(3)    | 33(3)    | 2(2)     | 16(3)    | -4(2)     |
| C4G  | 47(3)    | 30(3)    | 26(3)    | 4(2)     | 13(2)    | -4(2)     |

|      |         |         |         |          |          |          |
|------|---------|---------|---------|----------|----------|----------|
| C5G  | 41(3)   | 27(2)   | 21(2)   | 4.5(19)  | 10.9(19) | 0(2)     |
| C6G  | 44(3)   | 37(3)   | 26(3)   | 7(2)     | 8(2)     | 3(2)     |
| C7G  | 36(3)   | 29(3)   | 22(2)   | 3.9(19)  | 7.8(19)  | -4(2)    |
| C8G  | 35(3)   | 31(3)   | 26(2)   | 2(2)     | 9(2)     | -5(2)    |
| C9G  | 31(2)   | 42(3)   | 39(3)   | -3(2)    | 11(2)    | 0(2)     |
| C10G | 42(3)   | 45(3)   | 41(3)   | -11(3)   | 15(2)    | 0(2)     |
| C11G | 45(3)   | 32(3)   | 34(3)   | -7(2)    | 13(2)    | -5(2)    |
| C12G | 36(3)   | 34(3)   | 25(2)   | 1(2)     | 5.7(19)  | -3(2)    |
| C13G | 40(3)   | 29(3)   | 44(3)   | 7(2)     | 6(2)     | 7(2)     |
| C14G | 36(3)   | 39(3)   | 35(3)   | 1(2)     | 5(2)     | 11(2)    |
| C15G | 34(3)   | 39(3)   | 40(3)   | 2(2)     | 2(2)     | -7(2)    |
| C16G | 56(3)   | 42(3)   | 32(3)   | -4(2)    | -7(2)    | -6(3)    |
| C11H | 73.0(9) | 24.2(6) | 39.0(7) | -4.9(5)  | 8.8(6)   | -8.0(6)  |
| N1H  | 46(2)   | 30(2)   | 29(2)   | -8.8(18) | 16.1(19) | -6.9(19) |
| C1H  | 49(3)   | 22(2)   | 23(2)   | -3.9(19) | 3(2)     | 0(2)     |
| C2H  | 55(3)   | 35(3)   | 29(3)   | 3(2)     | 10(2)    | -18(2)   |
| C3H  | 54(3)   | 38(3)   | 27(3)   | -5(2)    | 16(2)    | -9(3)    |
| C4H  | 40(3)   | 33(3)   | 22(2)   | -3(2)    | 9(2)     | -5(2)    |
| C5H  | 31(2)   | 33(3)   | 20(2)   | 1(2)     | 5.1(19)  | 3(2)     |
| C6H  | 35(2)   | 35(3)   | 19(2)   | -2(2)    | 2.6(19)  | 1(2)     |
| C7H  | 31(2)   | 29(2)   | 24(2)   | 2.2(19)  | 4.1(18)  | -2.2(19) |
| C8H  | 39(3)   | 32(3)   | 27(2)   | -3(2)    | 6(2)     | -4(2)    |
| C9H  | 47(3)   | 26(3)   | 39(3)   | -6(2)    | 11(2)    | -5(2)    |
| C10H | 48(3)   | 31(3)   | 47(3)   | -1(2)    | -2(3)    | -12(2)   |
| C11H | 31(3)   | 38(3)   | 42(3)   | 7(2)     | 10(2)    | -7(2)    |
| C12H | 29(2)   | 38(3)   | 27(2)   | 2(2)     | 7.5(19)  | 0(2)     |
| C13H | 43(3)   | 35(3)   | 50(3)   | 14(2)    | 3(3)     | -8(2)    |
| C14H | 45(3)   | 25(3)   | 64(4)   | 7(2)     | 6(3)     | -1(2)    |
| C15H | 39(3)   | 48(3)   | 27(3)   | 1(2)     | 10(2)    | -5(2)    |
| C16H | 34(3)   | 41(3)   | 38(3)   | -1(2)    | 8(2)     | 2(2)     |

Table 4 Bond Lengths for JW315a.

| Atom Atom Length/Å |          | Atom Atom Length/Å |          |
|--------------------|----------|--------------------|----------|
| C11A C1A           | 1.774(5) | C7E C12E           | 1.514(7) |
| N1A C4A            | 1.370(7) | C8E C9E            | 1.499(8) |
| N1A C8A            | 1.372(7) | C9E C10E           | 1.535(9) |
| C1A C2A            | 1.399(8) | C9E C14E           | 1.530(9) |
| C1A C6A            | 1.370(7) | C10E C11E          | 1.543(9) |
| C2A C3A            | 1.376(8) | C11E C12E          | 1.566(8) |
| C3A C4A            | 1.395(7) | C11E C13E          | 1.514(9) |
| C4A C5A            | 1.415(7) | C12E C15E          | 1.547(8) |
| C5A C6A            | 1.406(7) | C12E C16E          | 1.540(8) |

|           |           |           |           |
|-----------|-----------|-----------|-----------|
| C5A C7A   | 1.448(7)  | C13E C14E | 1.318(9)  |
| C7A C8A   | 1.363(7)  | C11F C1F  | 1.737(11) |
| C7A C12A  | 1.518(7)  | N1F C4F   | 1.382(13) |
| C8A C9A   | 1.498(7)  | N1F C8F   | 1.375(13) |
| C9A C10A  | 1.598(9)  | C1F C2F   | 1.416(16) |
| C9A C14A  | 1.519(8)  | C1F C6F   | 1.355(13) |
| C10A C11A | 1.524(9)  | C2F C3F   | 1.391(15) |
| C11A C12A | 1.563(7)  | C3F C4F   | 1.396(12) |
| C11A C13A | 1.489(9)  | C4F C5F   | 1.408(14) |
| C12A C15A | 1.544(8)  | C5F C6F   | 1.401(13) |
| C12A C16A | 1.523(8)  | C5F C7F   | 1.443(12) |
| C13A C14A | 1.286(10) | C7F C8F   | 1.368(13) |
| C11B C1B  | 1.747(6)  | C7F C12F  | 1.514(13) |
| N1B C4B   | 1.371(7)  | C8F C9F   | 1.469(13) |
| N1B C8B   | 1.376(7)  | C9F C10F  | 1.558(14) |
| C1B C2B   | 1.396(8)  | C9F C14F  | 1.526(13) |
| C1B C6B   | 1.374(8)  | C10F C11F | 1.540(14) |
| C2B C3B   | 1.378(8)  | C11F C12F | 1.561(14) |
| C3B C4B   | 1.388(7)  | C11F C13F | 1.499(14) |
| C4B C5B   | 1.418(7)  | C12F C15F | 1.555(15) |
| C5B C6B   | 1.405(7)  | C12F C16F | 1.552(14) |
| C5B C7B   | 1.437(7)  | C13F C14F | 1.316(15) |
| C7B C8B   | 1.347(7)  | C11Z C1Z  | 1.759(14) |
| C7B C12B  | 1.521(7)  | N1Z C4Z   | 1.378(17) |
| C8B C9B   | 1.512(7)  | N1Z C8Z   | 1.386(17) |
| C9B C10B  | 1.536(8)  | C1Z C2Z   | 1.419(19) |
| C9B C14B  | 1.523(8)  | C1Z C6Z   | 1.360(17) |
| C10B C11B | 1.543(8)  | C2Z C3Z   | 1.38(2)   |
| C11B C12B | 1.569(8)  | C3Z C4Z   | 1.408(17) |
| C11B C13B | 1.520(9)  | C4Z C5Z   | 1.405(17) |
| C12B C15B | 1.537(8)  | C5Z C6Z   | 1.391(17) |
| C12B C16B | 1.540(8)  | C5Z C7Z   | 1.439(17) |
| C13B C14B | 1.319(9)  | C7Z C8Z   | 1.358(17) |
| C11C C1C  | 1.760(6)  | C7Z C12Z  | 1.520(17) |
| N1C C4C   | 1.379(8)  | C8Z C9Z   | 1.478(18) |
| N1C C8C   | 1.377(7)  | C9Z C10Z  | 1.539(19) |
| C1C C2C   | 1.381(9)  | C9Z C14Z  | 1.525(19) |
| C1C C6C   | 1.379(8)  | C10Z C11Z | 1.54(2)   |
| C2C C3C   | 1.375(10) | C11Z C12Z | 1.555(18) |
| C3C C4C   | 1.406(8)  | C11Z C13Z | 1.505(19) |
| C4C C5C   | 1.415(7)  | C12Z C15Z | 1.546(18) |
| C5C C6C   | 1.402(8)  | C12Z C16Z | 1.548(18) |

|      |      |          |      |      |          |
|------|------|----------|------|------|----------|
| C5C  | C7C  | 1.440(7) | C13Z | C14Z | 1.30(2)  |
| C7C  | C8C  | 1.365(8) | C11G | C1G  | 1.759(6) |
| C7C  | C12C | 1.516(7) | N1G  | C4G  | 1.365(7) |
| C8C  | C9C  | 1.503(8) | N1G  | C8G  | 1.366(7) |
| C9C  | C10C | 1.544(9) | C1G  | C2G  | 1.385(9) |
| C9C  | C14C | 1.518(9) | C1G  | C6G  | 1.382(8) |
| C10C | C11C | 1.523(8) | C2G  | C3G  | 1.389(9) |
| C11C | C12C | 1.579(7) | C3G  | C4G  | 1.390(7) |
| C11C | C13C | 1.507(9) | C4G  | C5G  | 1.421(8) |
| C12C | C15C | 1.537(7) | C5G  | C6G  | 1.412(8) |
| C12C | C16C | 1.514(8) | C5G  | C7G  | 1.426(7) |
| C13C | C14C | 1.317(9) | C7G  | C8G  | 1.364(7) |
| C11D | C1D  | 1.757(6) | C7G  | C12G | 1.521(7) |
| N1D  | C4D  | 1.376(7) | C8G  | C9G  | 1.502(7) |
| N1D  | C8D  | 1.381(7) | C9G  | C10G | 1.544(8) |
| C1D  | C2D  | 1.387(9) | C9G  | C14G | 1.522(8) |
| C1D  | C6D  | 1.372(8) | C10G | C11G | 1.539(7) |
| C2D  | C3D  | 1.372(9) | C11G | C12G | 1.560(8) |
| C3D  | C4D  | 1.386(8) | C11G | C13G | 1.524(8) |
| C4D  | C5D  | 1.419(7) | C12G | C15G | 1.535(7) |
| C5D  | C6D  | 1.408(8) | C12G | C16G | 1.547(7) |
| C5D  | C7D  | 1.435(7) | C13G | C14G | 1.331(8) |
| C7D  | C8D  | 1.359(8) | C11H | C1H  | 1.757(5) |
| C7D  | C12D | 1.528(7) | N1H  | C4H  | 1.371(7) |
| C8D  | C9D  | 1.501(8) | N1H  | C8H  | 1.360(7) |
| C9D  | C10D | 1.545(8) | C1H  | C2H  | 1.380(8) |
| C9D  | C14D | 1.532(9) | C1H  | C6H  | 1.392(7) |
| C10D | C11D | 1.542(9) | C2H  | C3H  | 1.389(8) |
| C11D | C12D | 1.558(8) | C3H  | C4H  | 1.386(7) |
| C11D | C13D | 1.511(8) | C4H  | C5H  | 1.418(7) |
| C12D | C15D | 1.539(8) | C5H  | C6H  | 1.402(7) |
| C12D | C16D | 1.534(8) | C5H  | C7H  | 1.439(7) |
| C13D | C14D | 1.315(9) | C7H  | C8H  | 1.364(7) |
| C11E | C1E  | 1.765(6) | C7H  | C12H | 1.530(6) |
| N1E  | C4E  | 1.375(7) | C8H  | C9H  | 1.505(7) |
| N1E  | C8E  | 1.377(7) | C9H  | C10H | 1.541(8) |
| C1E  | C2E  | 1.402(8) | C9H  | C14H | 1.526(8) |
| C1E  | C6E  | 1.368(8) | C10H | C11H | 1.545(8) |
| C2E  | C3E  | 1.381(8) | C11H | C12H | 1.573(7) |
| C3E  | C4E  | 1.384(8) | C11H | C13H | 1.515(8) |
| C4E  | C5E  | 1.424(7) | C12H | C15H | 1.535(7) |
| C5E  | C6E  | 1.413(8) | C12H | C16H | 1.542(7) |



C5E C7E 1.426(7) C13HC14H 1.300(8)  
 C7E C8E 1.368(7)

Table 5 Bond Angles for JW315a.

| Atom | Atom | Atom | Angle/°  | Atom | Atom | Atom | Angle/°   |
|------|------|------|----------|------|------|------|-----------|
| C4A  | N1A  | C8A  | 108.8(4) | C7E  | C8E  | N1E  | 110.1(5)  |
| C2A  | C1A  | C11A | 118.0(4) | C7E  | C8E  | C9E  | 123.3(5)  |
| C6A  | C1A  | C11A | 118.9(4) | C8E  | C9E  | C10E | 104.8(5)  |
| C6A  | C1A  | C2A  | 123.1(5) | C8E  | C9E  | C14E | 106.9(5)  |
| C3A  | C2A  | C1A  | 119.8(5) | C14E | C9E  | C10E | 99.6(5)   |
| C2A  | C3A  | C4A  | 118.1(5) | C9E  | C10E | C11E | 100.1(5)  |
| N1A  | C4A  | C3A  | 129.8(5) | C10E | C11E | C12E | 110.8(5)  |
| N1A  | C4A  | C5A  | 108.0(4) | C13E | C11E | C10E | 100.0(5)  |
| C3A  | C4A  | C5A  | 122.2(5) | C13E | C11E | C12E | 112.1(5)  |
| C4A  | C5A  | C7A  | 106.4(4) | C7E  | C12E | C11E | 108.5(5)  |
| C6A  | C5A  | C4A  | 118.7(5) | C7E  | C12E | C15E | 109.7(4)  |
| C6A  | C5A  | C7A  | 134.9(5) | C7E  | C12E | C16E | 110.9(5)  |
| C1A  | C6A  | C5A  | 118.1(5) | C15E | C12E | C11E | 109.6(5)  |
| C5A  | C7A  | C12A | 131.1(5) | C16E | C12E | C11E | 109.3(5)  |
| C8A  | C7A  | C5A  | 106.2(4) | C16E | C12E | C15E | 108.8(5)  |
| C8A  | C7A  | C12A | 122.7(5) | C14E | C13E | C11E | 109.9(6)  |
| N1A  | C8A  | C9A  | 126.3(5) | C13E | C14E | C9E  | 110.0(6)  |
| C7A  | C8A  | N1A  | 110.6(5) | C8F  | N1F  | C4F  | 109.2(10) |
| C7A  | C8A  | C9A  | 123.1(5) | C2F  | C1F  | C11F | 115.7(9)  |
| C8A  | C9A  | C10A | 104.2(4) | C6F  | C1F  | C11F | 121.2(10) |
| C8A  | C9A  | C14A | 106.9(5) | C6F  | C1F  | C2F  | 123.1(10) |
| C14A | C9A  | C10A | 97.5(5)  | C3F  | C2F  | C1F  | 119.0(10) |
| C11A | C10A | C9A  | 98.7(5)  | C2F  | C3F  | C4F  | 118.0(10) |
| C10A | C11A | C12A | 110.9(5) | N1F  | C4F  | C3F  | 130.5(12) |
| C13A | C11A | C10A | 102.1(6) | N1F  | C4F  | C5F  | 107.3(9)  |
| C13A | C11A | C12A | 110.5(5) | C3F  | C4F  | C5F  | 122.1(11) |
| C7A  | C12A | C11A | 108.4(5) | C4F  | C5F  | C7F  | 106.9(9)  |
| C7A  | C12A | C15A | 109.4(5) | C6F  | C5F  | C4F  | 119.0(10) |
| C7A  | C12A | C16A | 111.1(5) | C6F  | C5F  | C7F  | 134.1(11) |
| C15A | C12A | C11A | 110.5(5) | C1F  | C6F  | C5F  | 118.6(10) |
| C16A | C12A | C11A | 109.0(5) | C5F  | C7F  | C12F | 130.8(11) |
| C16A | C12A | C15A | 108.6(6) | C8F  | C7F  | C5F  | 106.6(10) |
| C14A | C13A | C11A | 110.1(6) | C8F  | C7F  | C12F | 121.8(11) |
| C13A | C14A | C9A  | 112.1(7) | N1F  | C8F  | C9F  | 126.2(11) |
| C4B  | N1B  | C8B  | 108.5(4) | C7F  | C8F  | N1F  | 109.5(10) |
| C2B  | C1B  | C11B | 118.8(4) | C7F  | C8F  | C9F  | 124.0(11) |
| C6B  | C1B  | C11B | 118.6(4) | C8F  | C9F  | C10F | 104.3(11) |

C6B C1B C2B 122.6(5) C8F C9F C14F 108.2(12)  
 C3B C2B C1B 119.8(5) C14F C9F C10F 99.3(10)  
 C2B C3B C4B 118.3(5) C11F C10F C9F 99.6(9)  
 N1B C4B C3B 130.2(5) C10F C11F C12F 111.6(11)  
 N1B C4B C5B 107.3(5) C13F C11F C10F 99.1(11)  
 C3B C4B C5B 122.5(5) C13F C11F C12F 111.8(12)  
 C4B C5B C7B 106.8(4) C7F C12F C11F 108.3(11)  
 C6B C5B C4B 117.9(5) C7F C12F C15F 110.4(13)  
 C6B C5B C7B 135.3(5) C7F C12F C16F 110.0(13)  
 C1B C6B C5B 118.8(5) C15F C12F C11F 109.3(13)  
 C5B C7B C12B 130.2(5) C16F C12F C11F 109.3(12)  
 C8B C7B C5B 106.5(4) C16F C12F C15F 109.5(13)  
 C8B C7B C12B 123.1(5) C14F C13F C11F 111.7(11)  
 N1B C8B C9B 126.4(5) C13F C14F C9F 108.9(11)  
 C7B C8B N1B 110.9(5) C4Z N1Z C8Z 107.1(13)  
 C7B C8B C9B 122.7(5) C2Z C1Z C11Z 119.6(12)  
 C8B C9B C10B 104.2(5) C6Z C1Z C11Z 117.7(13)  
 C8B C9B C14B 108.4(4) C6Z C1Z C2Z 122.7(14)  
 C14B C9B C10B 100.6(5) C3Z C2Z C1Z 120.8(14)  
 C9B C10B C11B 99.7(5) C2Z C3Z C4Z 116.6(15)  
 C10B C11B C12B 110.6(4) N1Z C4Z C3Z 129.0(16)  
 C13B C11B C10B 99.8(5) N1Z C4Z C5Z 109.1(12)  
 C13B C11B C12B 111.7(5) C5Z C4Z C3Z 121.8(15)  
 C7B C12B C11B 108.0(4) C4Z C5Z C7Z 105.8(13)  
 C7B C12B C15B 109.6(5) C6Z C5Z C4Z 120.7(14)  
 C7B C12B C16B 111.1(4) C6Z C5Z C7Z 133.1(16)  
 C15B C12B C11B 110.9(5) C1Z C6Z C5Z 117.4(15)  
 C15B C12B C16B 108.9(5) C5Z C7Z C12Z 128.5(16)  
 C16B C12B C11B 108.4(5) C8Z C7Z C5Z 106.9(14)  
 C14B C13B C11B 110.9(5) C8Z C7Z C12Z 124.0(15)  
 C13B C14B C9B 108.8(5) N1Z C8Z C9Z 127.5(17)  
 C8C N1C C4C 108.8(5) C7Z C8Z N1Z 110.4(15)  
 C2C C1C C11C 119.4(5) C7Z C8Z C9Z 122.0(16)  
 C6C C1C C11C 117.6(5) C8Z C9Z C10Z 105.4(16)  
 C6C C1C C2C 123.0(6) C8Z C9Z C14Z 107(2)  
 C3C C2C C1C 120.2(6) C14Z C9Z C10Z 98.3(15)  
 C2C C3C C4C 118.4(6) C11Z C10Z C9Z 100.7(14)  
 N1C C4C C3C 131.3(5) C10Z C11Z C12Z 110.6(16)  
 N1C C4C C5C 107.5(5) C13Z C11Z C10Z 99.5(16)  
 C3C C4C C5C 121.2(5) C13Z C11Z C12Z 112(2)  
 C4C C5C C7C 106.9(5) C7Z C12Z C11Z 107.6(15)  
 C6C C5C C4C 119.1(5) C7Z C12Z C15Z 110(2)

C6C C5C C7C 134.0(5) C7Z C12Z C16Z 108.3(19)  
 C1C C6C C5C 118.1(5) C15Z C12Z C11Z 111.3(17)  
 C5C C7C C12C 130.8(5) C15Z C12Z C16Z 108.5(18)  
 C8C C7C C5C 106.5(5) C16Z C12Z C11Z 111.3(17)  
 C8C C7C C12C 122.7(5) C14Z C13Z C11Z 110.5(17)  
 N1C C8C C9C 127.1(5) C13Z C14Z C9Z 110.6(17)  
 C7C C8C N1C 110.2(5) C4G N1G C8G 108.9(4)  
 C7C C8C C9C 122.6(5) C2G C1G C11G 117.9(5)  
 C8C C9C C10C 104.1(5) C6G C1G C11G 118.1(5)  
 C8C C9C C14C 108.0(4) C6G C1G C2G 124.0(5)  
 C14C C9C C10C 100.0(5) C1G C2G C3G 119.1(5)  
 C11C C10C C9C 100.0(5) C2G C3G C4G 118.5(6)  
 C10C C11C C12C 110.2(5) N1G C4G C3G 130.0(5)  
 C13C C11C C10C 100.6(5) N1G C4G C5G 107.6(5)  
 C13C C11C C12C 111.9(4) C3G C4G C5G 122.4(5)  
 C7C C12C C11C 108.1(4) C4G C5G C7G 106.5(4)  
 C7C C12C C15C 110.6(4) C6G C5G C4G 118.2(5)  
 C15C C12C C11C 109.1(4) C6G C5G C7G 135.3(5)  
 C16C C12C C7C 110.4(4) C1G C6G C5G 117.7(5)  
 C16C C12C C11C 110.0(4) C5G C7G C12G 131.7(5)  
 C16C C12C C15C 108.6(5) C8G C7G C5G 106.7(5)  
 C14C C13C C11C 110.3(6) C8G C7G C12G 121.6(5)  
 C13C C14C C9C 109.6(6) N1G C8G C9G 125.7(5)  
 C4D N1D C8D 108.4(5) C7G C8G N1G 110.2(5)  
 C2D C1D C11D 116.8(5) C7G C8G C9G 123.9(5)  
 C6D C1D C11D 118.4(5) C8G C9G C10G 103.6(5)  
 C6D C1D C2D 124.7(6) C8G C9G C14G 107.4(4)  
 C3D C2D C1D 119.0(6) C14G C9G C10G 100.2(5)  
 C2D C3D C4D 118.3(5) C11G C10G C9G 100.1(4)  
 N1D C4D C3D 129.6(5) C10G C11G C12G 110.9(5)  
 N1D C4D C5D 107.6(5) C13G C11G C10G 100.2(5)  
 C3D C4D C5D 122.7(5) C13G C11G C12G 111.6(4)  
 C4D C5D C7D 106.8(5) C7G C12G C11G 108.7(4)  
 C6D C5D C4D 118.2(5) C7G C12G C15G 111.0(4)  
 C6D C5D C7D 135.0(5) C7G C12G C16G 109.7(4)  
 C1D C6D C5D 117.0(5) C15G C12G C11G 110.4(4)  
 C5D C7D C12D 130.7(5) C15G C12G C16G 108.4(4)  
 C8D C7D C5D 106.6(4) C16G C12G C11G 108.6(4)  
 C8D C7D C12D 122.6(5) C14G C13G C11G 109.7(5)  
 N1D C8D C9D 126.2(5) C13G C14G C9G 109.9(5)  
 C7D C8D N1D 110.5(5) C8H N1H C4H 108.9(4)  
 C7D C8D C9D 123.1(5) C2H C1H C11H 117.5(4)

C8D C9D C10D 104.7(5) C2H C1H C6H 123.4(5)  
 C8D C9D C14D 106.3(5) C6H C1H C11H 119.1(4)  
 C14DC9D C10D 100.0(5) C1H C2H C3H 120.0(5)  
 C11DC10DC9D 99.6(5) C4H C3H C2H 117.4(5)  
 C10DC11DC12D 111.0(5) N1H C4H C3H 129.1(5)  
 C13DC11DC10D 100.7(5) N1H C4H C5H 107.8(4)  
 C13DC11DC12D 111.2(5) C3H C4H C5H 123.2(5)  
 C7D C12DC11D 107.6(5) C4H C5H C7H 106.3(4)  
 C7D C12DC15D 111.3(5) C6H C5H C4H 118.4(5)  
 C7D C12DC16D 109.1(4) C6H C5H C7H 135.3(4)  
 C15DC12DC11D 110.5(5) C1H C6H C5H 117.6(4)  
 C16DC12DC11D 109.6(5) C5H C7H C12H 131.1(4)  
 C16DC12DC15D 108.7(5) C8H C7H C5H 106.4(4)  
 C14DC13DC11D 110.6(6) C8H C7H C12H 122.5(5)  
 C13DC14DC9D 109.5(6) N1H C8H C7H 110.7(5)  
 C4E N1E C8E 108.8(4) N1H C8H C9H 126.6(5)  
 C2E C1E C11E 117.3(4) C7H C8H C9H 122.7(5)  
 C6E C1E C11E 119.0(4) C8H C9H C10H 105.0(4)  
 C6E C1E C2E 123.7(5) C8H C9H C14H 107.2(5)  
 C3E C2E C1E 118.9(5) C14HC9H C10H 100.6(4)  
 C2E C3E C4E 118.7(5) C9H C10HC11H 99.3(4)  
 N1E C4E C3E 129.9(5) C10HC11HC12H 110.4(4)  
 N1E C4E C5E 107.3(5) C13HC11HC10H 100.0(5)  
 C3E C4E C5E 122.7(5) C13HC11HC12H 111.9(4)  
 C4E C5E C7E 107.0(5) C7H C12HC11H 108.0(4)  
 C6E C5E C4E 117.6(5) C7H C12HC15H 111.3(4)  
 C6E C5E C7E 135.4(5) C7H C12HC16H 110.1(4)  
 C1E C6E C5E 118.3(5) C15HC12HC11H 109.8(4)  
 C5E C7E C12E 130.9(5) C15HC12HC16H 109.2(4)  
 C8E C7E C5E 106.8(4) C16HC12HC11H 108.4(4)  
 C8E C7E C12E 122.2(5) C14HC13HC11H 111.4(5)  
 N1E C8E C9E 126.6(5) C13HC14HC9H 109.1(5)

Table 6 Torsion Angles for JW315a.

| A    | B   | C   | D    | Angle/°   | A   | B   | C    | D    | Angle/°   |
|------|-----|-----|------|-----------|-----|-----|------|------|-----------|
| C11A | C1A | C2A | C3A  | -179.3(4) | C7E | C5E | C6E  | C1E  | -179.0(6) |
| C11A | C1A | C6A | C5A  | 179.6(4)  | C7E | C8E | C9E  | C10E | -34.8(7)  |
| N1A  | C4A | C5A | C6A  | -179.7(4) | C7E | C8E | C9E  | C14E | 70.4(7)   |
| N1A  | C4A | C5A | C7A  | 0.6(5)    | C8E | N1E | C4E  | C3E  | -178.2(6) |
| N1A  | C8A | C9A | C10A | 145.1(5)  | C8E | N1E | C4E  | C5E  | 1.0(6)    |
| N1A  | C8A | C9A | C14A | -112.3(6) | C8E | C7E | C12E | C11E | 0.1(7)    |
| C1A  | C2A | C3A | C4A  | -0.5(8)   | C8E | C7E | C12E | C15E | -119.6(6) |

C2A C1A C6A C5A 0.3(8) C8E C7E C12E C16E 120.1(6)  
C2A C3A C4A N1A 179.7(5) C8E C9E C10E C11E 69.0(6)  
C2A C3A C4A C5A 0.8(7) C8E C9E C14E C13E -82.1(6)  
C3A C4A C5A C6A -0.5(7) C9E C10E C11E C12E -76.4(6)  
C3A C4A C5A C7A 179.7(5) C9E C10E C11E C13E 42.1(5)  
C4A N1A C8A C7A -0.7(6) C10E C9E C14E C13E 26.7(6)  
C4A N1A C8A C9A 178.4(5) C10E C11E C12E C7E 40.0(6)  
C4A C5A C6A C1A -0.1(7) C10E C11E C12E C15E 159.8(5)  
C4A C5A C7A C8A -1.0(5) C10E C11E C12E C16E -81.1(6)  
C4A C5A C7A C12A -179.5(5) C10E C11E C13E C14E -27.5(6)  
C5A C7A C8A N1A 1.0(6) C11E C13E C14E C9E 0.6(7)  
C5A C7A C8A C9A -178.1(5) C12E C7E C8E N1E 177.8(5)  
C5A C7A C12A C11A 176.4(5) C12E C7E C8E C9E -2.2(8)  
C5A C7A C12A C15A 55.8(8) C12E C11E C13E C14E 90.0(6)  
C5A C7A C12A C16A -64.0(8) C13E C11E C12E C7E -70.8(6)  
C6A C1A C2A C3A -0.1(8) C13E C11E C12E C15E 49.0(7)  
C6A C5A C7A C8A 179.3(5) C13E C11E C12E C16E 168.1(5)  
C6A C5A C7A C12A 0.8(10) C14E C9E C10E C11E -41.4(6)  
C7A C5A C6A C1A 179.6(5) C11F C1F C2F C3F 177.7(11)  
C7A C8A C9A C10A -35.9(7) C11F C1F C6F C5F -176.9(18)  
C7A C8A C9A C14A 66.7(7) N1F C4F C5F C6F 179(2)  
C8A N1A C4A C3A -179.0(5) N1F C4F C5F C7F -2(3)  
C8A N1A C4A C5A 0.1(5) N1F C8F C9F C10F 145(2)  
C8A C7A C12A C11A -2.0(7) N1F C8F C9F C14F -110(2)  
C8A C7A C12A C15A -122.5(6) C1F C2F C3F C4F -2.5(19)  
C8A C7A C12A C16A 117.7(6) C2F C1F C6F C5F 0(3)  
C8A C9A C10A C11A 69.4(5) C2F C3F C4F N1F -178.6(17)  
C8A C9A C14A C13A -79.4(8) C2F C3F C4F C5F 4(2)  
C9A C10A C11A C12A -77.2(6) C3F C4F C5F C6F -3(4)  
C9A C10A C11A C13A 40.5(5) C3F C4F C5F C7F 175.8(18)  
C10A C9A C14A C13A 28.0(8) C4F N1F C8F C7F 6(3)  
C10A C11A C12A C7A 42.7(7) C4F N1F C8F C9F -179(2)  
C10A C11A C12A C15A 162.6(6) C4F C5F C6F C1F 1(4)  
C10A C11A C12A C16A -78.2(7) C4F C5F C7F C8F 6(3)  
C10A C11A C13A C14A -25.8(8) C4F C5F C7F C12F 175(2)  
C11A C13A C14A C9A -2.5(9) C5F C7F C8F N1F -7(3)  
C12A C7A C8A N1A 179.7(5) C5F C7F C8F C9F 178(2)  
C12A C7A C8A C9A 0.6(8) C5F C7F C12F C11F -174(3)  
C12A C11A C13A C14A 92.2(7) C5F C7F C12F C15F 66(3)  
C13A C11A C12A C7A -69.7(6) C5F C7F C12F C16F -55(3)  
C13A C11A C12A C15A 50.2(7) C6F C1F C2F C3F 1(2)  
C13A C11A C12A C16A 169.3(6) C6F C5F C7F C8F -175(3)

C14A C9A C10A C11A -40.2(5) C6F C5F C7F C12F -6(6)  
C11B C1B C2B C3B -178.9(4) C7F C5F C6F C1F -178(3)  
C11B C1B C6B C5B 177.3(4) C7F C8F C9F C10F -41(3)  
N1B C4B C5B C6B -179.3(5) C7F C8F C9F C14F 64(3)  
N1B C4B C5B C7B -0.4(6) C8F N1F C4F C3F -179.9(18)  
N1B C8B C9B C10B 146.8(5) C8F N1F C4F C5F -2(3)  
N1B C8B C9B C14B -106.7(6) C8F C7F C12F C11F -6(3)  
C1B C2B C3B C4B 1.5(8) C8F C7F C12F C15F -126(2)  
C2B C1B C6B C5B -1.2(8) C8F C7F C12F C16F 113(3)  
C2B C3B C4B N1B 177.3(5) C8F C9F C10F C11F 69.4(14)  
C2B C3B C4B C5B -1.0(8) C8F C9F C14F C13F -82.0(18)  
C3B C4B C5B C6B -0.6(8) C9F C10F C11F C12F -75.2(14)  
C3B C4B C5B C7B 178.3(5) C9F C10F C11F C13F 42.8(14)  
C4B N1B C8B C7B -0.3(6) C10F C9F C14F C13F 26.5(18)  
C4B N1B C8B C9B 177.3(5) C10F C11F C12F C7F 42.0(16)  
C4B C5B C6B C1B 1.7(7) C10F C11F C12F C15F 162.3(14)  
C4B C5B C7B C8B 0.2(6) C10F C11F C12F C16F -77.8(16)  
C4B C5B C7B C12B -175.1(5) C10F C11F C13F C14F -29(2)  
C5B C7B C8B N1B 0.0(6) C11F C13F C14F C9F 1(2)  
C5B C7B C8B C9B -177.7(5) C12F C7F C8F N1F -178(2)  
C5B C7B C12B C11B 175.4(5) C12F C7F C8F C9F 7(4)  
C5B C7B C12B C15B 54.5(7) C12F C11F C13F C14F 89(2)  
C5B C7B C12B C16B -65.9(7) C13F C11F C12F C7F -68.1(16)  
C6B C1B C2B C3B -0.4(8) C13F C11F C12F C15F 52.3(17)  
C6B C5B C7B C8B 178.8(6) C13F C11F C12F C16F 172.2(15)  
C6B C5B C7B C12B 3.5(10) C14F C9F C10F C11F -42.2(13)  
C7B C5B C6B C1B -176.8(5) C11Z C1Z C2Z C3Z 178.9(15)  
C7B C8B C9B C10B -35.8(7) C11Z C1Z C6Z C5Z -179(2)  
C7B C8B C9B C14B 70.6(7) N1Z C4Z C5Z C6Z 179(3)  
C8B N1B C4B C3B -178.1(6) N1Z C4Z C5Z C7Z 5(4)  
C8B N1B C4B C5B 0.4(6) N1Z C8Z C9Z C10Z 142(4)  
C8B C7B C12B C11B 0.7(7) N1Z C8Z C9Z C14Z -114(4)  
C8B C7B C12B C15B -120.1(6) C1Z C2Z C3Z C4Z -2(3)  
C8B C7B C12B C16B 119.5(6) C2Z C1Z C6Z C5Z 0(4)  
C8B C9B C10B C11B 70.2(5) C2Z C3Z C4Z N1Z -179(2)  
C8B C9B C14B C13B -80.9(6) C2Z C3Z C4Z C5Z 3(4)  
C9B C10B C11B C12B -76.8(6) C3Z C4Z C5Z C6Z -3(6)  
C9B C10B C11B C13B 41.0(5) C3Z C4Z C5Z C7Z -176(3)  
C10B C9B C14B C13B 28.1(6) C4Z N1Z C8Z C7Z -5(4)  
C10B C11B C12B C7B 39.4(6) C4Z N1Z C8Z C9Z 180(3)  
C10B C11B C12B C15B 159.5(5) C4Z C5Z C6Z C1Z 1(5)  
C10B C11B C12B C16B -81.0(6) C4Z C5Z C7Z C8Z -8(5)

C10B C11B C13B C14B -25.9(6) C4Z C5Z C7Z C12Z -179(3)  
C11B C13B C14B C9B -1.3(7) C5Z C7Z C8Z N1Z 8(5)  
C12B C7B C8B N1B 175.7(5) C5Z C7Z C8Z C9Z -176(4)  
C12B C7B C8B C9B -2.0(8) C5Z C7Z C12Z C11Z 171(4)  
C12B C11B C13B C14B 91.0(6) C5Z C7Z C12Z C15Z 50(5)  
C13B C11B C12B C7B -70.7(6) C5Z C7Z C12Z C16Z -68(5)  
C13B C11B C12B C15B 49.4(6) C6Z C1Z C2Z C3Z 0(3)  
C13B C11B C12B C16B 168.9(5) C6Z C5Z C7Z C8Z 180(5)  
C14B C9B C10B C11B -42.1(5) C6Z C5Z C7Z C12Z 9(8)  
C11C C1C C2C C3C -179.1(4) C7Z C5Z C6Z C1Z 172(4)  
C11C C1C C6C C5C 178.9(4) C7Z C8Z C9Z C10Z -33(4)  
N1C C4C C5C C6C -179.4(4) C7Z C8Z C9Z C14Z 71(4)  
N1C C4C C5C C7C 0.3(6) C8Z N1Z C4Z C3Z -179(3)  
N1C C8C C9C C10C 144.8(6) C8Z N1Z C4Z C5Z 0(4)  
N1C C8C C9C C14C -109.5(6) C8Z C7Z C12Z C11Z 2(5)  
C1C C2C C3C C4C 0.4(8) C8Z C7Z C12Z C15Z -119(4)  
C2C C1C C6C C5C -2.1(8) C8Z C7Z C12Z C16Z 123(4)  
C2C C3C C4C N1C 179.6(6) C8Z C9Z C10Z C11Z 69(2)  
C2C C3C C4C C5C -2.4(8) C8Z C9Z C14Z C13Z -81(3)  
C3C C4C C5C C6C 2.2(8) C9Z C10Z C11Z C12Z -76.0(19)  
C3C C4C C5C C7C -178.1(5) C9Z C10Z C11Z C13Z 42(2)  
C4C N1C C8C C7C 0.8(6) C10Z C9Z C14Z C13Z 28(3)  
C4C N1C C8C C9C 177.6(5) C10Z C11Z C12Z C7Z 39(3)  
C4C C5C C6C C1C 0.1(7) C10Z C11Z C12Z C15Z 159(2)  
C4C C5C C7C C8C 0.1(6) C10Z C11Z C12Z C16Z -80(3)  
C4C C5C C7C C12C 177.9(5) C10Z C11Z C13Z C14Z -26(4)  
C5C C7C C8C N1C -0.6(6) C11Z C13Z C14Z C9Z -1(4)  
C5C C7C C8C C9C -177.6(5) C12Z C7Z C8Z N1Z 179(3)  
C5C C7C C12C C11C 177.7(5) C12Z C7Z C8Z C9Z -5(6)  
C5C C7C C12C C15C 58.3(7) C12Z C11Z C13Z C14Z 91(3)  
C5C C7C C12C C16C -62.0(7) C13Z C11Z C12Z C7Z -71(3)  
C6C C1C C2C C3C 1.9(9) C13Z C11Z C12Z C15Z 49(2)  
C6C C5C C7C C8C 179.8(5) C13Z C11Z C12Z C16Z 170(2)  
C6C C5C C7C C12C -2.4(9) C14Z C9Z C10Z C11Z -41.8(18)  
C7C C5C C6C C1C -179.6(5) C11G C1G C2G C3G -179.6(4)  
C7C C8C C9C C10C -38.7(7) C11G C1G C6G C5G 179.1(4)  
C7C C8C C9C C14C 67.0(7) N1G C4G C5G C6G 179.5(4)  
C8C N1C C4C C3C 177.5(5) N1G C4G C5G C7G 0.2(5)  
C8C N1C C4C C5C -0.7(6) N1G C8G C9G C10G 146.2(5)  
C8C C7C C12C C11C -4.9(7) N1G C8G C9G C14G -108.3(6)  
C8C C7C C12C C15C -124.3(5) C1G C2G C3G C4G 0.5(8)  
C8C C7C C12C C16C 115.5(6) C2G C1G C6G C5G -0.5(8)

|                     |           |                     |           |
|---------------------|-----------|---------------------|-----------|
| C8C C9C C10C C11C   | 70.7(6)   | C2G C3G C4G N1G     | -179.9(5) |
| C8C C9C C14C C13C   | -82.1(6)  | C2G C3G C4G C5G     | -0.7(8)   |
| C9C C10C C11C C12C  | -77.2(6)  | C3G C4G C5G C6G     | 0.2(7)    |
| C9C C10C C11C C13C  | 41.0(6)   | C3G C4G C5G C7G     | -179.1(5) |
| C10C C9C C14C C13C  | 26.4(6)   | C4G N1G C8G C7G     | 1.0(6)    |
| C10C C11C C12C C7C  | 42.4(6)   | C4G N1G C8G C9G     | 177.5(5)  |
| C10C C11C C12C C15C | 162.7(5)  | C4G C5G C6G C1G     | 0.4(7)    |
| C10C C11C C12C C16C | -78.2(6)  | C4G C5G C7G C8G     | 0.4(5)    |
| C10C C11C C13C C14C | -26.9(6)  | C4G C5G C7G C12G    | -179.5(5) |
| C11C C13C C14C C9C  | 0.0(7)    | C5G C7G C8G N1G     | -0.9(6)   |
| C12C C7C C8C N1C    | -178.6(5) | C5G C7G C8G C9G     | -177.4(4) |
| C12C C7C C8C C9C    | 4.4(8)    | C5G C7G C12G C11G   | 176.9(5)  |
| C12C C11C C13C C14C | 90.1(6)   | C5G C7G C12G C15G   | 55.4(7)   |
| C13C C11C C12C C7C  | -68.7(6)  | C5G C7G C12G C16G   | -64.4(7)  |
| C13C C11C C12C C15C | 51.7(6)   | C6G C1G C2G C3G     | 0.0(9)    |
| C13C C11C C12C C16C | 170.7(5)  | C6G C5G C7G C8G     | -178.7(5) |
| C14C C9C C10C C11C  | -40.9(6)  | C6G C5G C7G C12G    | 1.4(9)    |
| C11D C1D C2D C3D    | -178.8(5) | C7G C5G C6G C1G     | 179.5(5)  |
| C11D C1D C6D C5D    | 178.7(4)  | C7G C8G C9G C10G    | -37.8(6)  |
| N1D C4D C5D C6D     | -179.1(5) | C7G C8G C9G C14G    | 67.7(6)   |
| N1D C4D C5D C7D     | 1.4(6)    | C8G N1G C4G C3G     | 178.5(5)  |
| N1D C8D C9D C10D    | 146.0(6)  | C8G N1G C4G C5G     | -0.8(5)   |
| N1D C8D C9D C14D    | -108.7(6) | C8G C7G C12G C11G   | -2.9(6)   |
| C1D C2D C3D C4D     | 1.2(9)    | C8G C7G C12G C15G   | -124.5(5) |
| C2D C1D C6D C5D     | 0.8(9)    | C8G C7G C12G C16G   | 115.7(5)  |
| C2D C3D C4D N1D     | 179.1(6)  | C8G C9G C10G C11G   | 69.7(5)   |
| C2D C3D C4D C5D     | -1.6(9)   | C8G C9G C14G C13G   | -81.4(5)  |
| C3D C4D C5D C6D     | 1.5(8)    | C9G C10G C11G C12G  | -76.6(5)  |
| C3D C4D C5D C7D     | -178.0(5) | C9G C10G C11G C13G  | 41.4(5)   |
| C4D N1D C8D C7D     | 1.0(6)    | C10G C9G C14G C13G  | 26.5(5)   |
| C4D N1D C8D C9D     | 177.1(5)  | C10G C11G C12G C7G  | 41.0(6)   |
| C4D C5D C6D C1D     | -1.0(8)   | C10G C11G C12G C15G | 163.0(4)  |
| C4D C5D C7D C8D     | -0.8(6)   | C10G C11G C12G C16G | -78.3(5)  |
| C4D C5D C7D C12D    | 177.1(5)  | C10G C11G C13G C14G | -27.1(6)  |
| C5D C7D C8D N1D     | -0.1(6)   | C11G C13G C14G C9G  | 0.3(6)    |
| C5D C7D C8D C9D     | -176.4(5) | C12G C7G C8G N1G    | 179.0(4)  |
| C5D C7D C12D C11D   | 175.3(5)  | C12G C7G C8G C9G    | 2.6(8)    |
| C5D C7D C12D C15D   | 54.1(7)   | C12G C11G C13G C14G | 90.4(5)   |
| C5D C7D C12D C16D   | -65.9(7)  | C13G C11G C12G C7G  | -69.9(5)  |
| C6D C1D C2D C3D     | -0.8(10)  | C13G C11G C12G C15G | 52.1(6)   |
| C6D C5D C7D C8D     | 179.8(6)  | C13G C11G C12G C16G | 170.8(4)  |
| C6D C5D C7D C12D    | -2.3(10)  | C14G C9G C10G C11G  | -41.3(5)  |



C7D C5D C6D C1D 178.3(6) C11H C1H C2H C3H 178.8(5)  
C7D C8D C9D C10D -38.3(8) C11H C1H C6H C5H -179.3(4)  
C7D C8D C9D C14D 67.0(7) N1H C4H C5H C6H 178.1(5)  
C8D N1D C4D C3D 177.9(6) N1H C4H C5H C7H 0.1(6)  
C8D N1D C4D C5D -1.5(6) N1H C8H C9H C10H 144.5(5)  
C8D C7D C12D C11D -7.1(7) N1H C8H C9H C14H -109.1(6)  
C8D C7D C12D C15D -128.4(6) C1H C2H C3H C4H -0.1(9)  
C8D C7D C12D C16D 111.7(6) C2H C1H C6H C5H 0.3(8)  
C8D C9D C10D C11D 68.8(6) C2H C3H C4H N1H -178.6(6)  
C8D C9D C14D C13D -80.9(6) C2H C3H C4H C5H 1.4(9)  
C9D C10D C11D C12D -77.3(6) C3H C4H C5H C6H -1.9(8)  
C9D C10D C11D C13D 40.5(6) C3H C4H C5H C7H -179.9(5)  
C10D C9D C14D C13D 27.7(6) C4H N1H C8H C7H 1.2(6)  
C10D C11D C12D C7D 44.3(6) C4H N1H C8H C9H -179.3(5)  
C10D C11D C12D C15D 166.0(5) C4H C5H C6H C1H 1.0(7)  
C10D C11D C12D C16D -74.3(6) C4H C5H C7H C8H 0.6(6)  
C10D C11D C13D C14D -25.6(6) C4H C5H C7H C12H -179.7(5)  
C11D C13D C14D C9D -1.4(7) C5H C7H C8H N1H -1.1(6)  
C12D C7D C8D N1D -178.2(5) C5H C7H C8H C9H 179.3(5)  
C12D C7D C8D C9D 5.5(8) C5H C7H C12H C11H 178.6(5)  
C12D C11D C13D C14D 92.1(6) C5H C7H C12H C15H 58.0(7)  
C13D C11D C12D C7D -67.1(6) C5H C7H C12H C16H -63.2(7)  
C13D C11D C12D C15D 54.7(6) C6H C1H C2H C3H -0.7(9)  
C13D C11D C12D C16D 174.4(5) C6H C5H C7H C8H -176.9(6)  
C14D C9D C10D C11D -41.1(6) C6H C5H C7H C12H 2.7(10)  
C11E C1E C2E C3E 179.4(5) C7H C5H C6H C1H 178.3(5)  
C11E C1E C6E C5E -179.4(4) C7H C8H C9H C10H -36.0(7)  
N1E C4E C5E C6E 179.7(5) C7H C8H C9H C14H 70.4(7)  
N1E C4E C5E C7E -0.5(6) C8H N1H C4H C3H 179.2(6)  
N1E C8E C9E C10E 145.3(6) C8H N1H C4H C5H -0.8(6)  
N1E C8E C9E C14E -109.6(6) C8H C7H C12H C11H -1.9(7)  
C1E C2E C3E C4E -0.8(10) C8H C7H C12H C15H -122.4(5)  
C2E C1E C6E C5E -0.5(9) C8H C7H C12H C16H 116.4(5)  
C2E C3E C4E N1E -179.9(6) C8H C9H C10H C11H 70.0(5)  
C2E C3E C4E C5E 1.1(9) C8H C9H C14H C13H -82.0(6)  
C3E C4E C5E C6E -1.0(8) C9H C10H C11H C12H -77.4(5)  
C3E C4E C5E C7E 178.7(5) C9H C10H C11H C13H 40.6(5)  
C4E N1E C8E C7E -1.1(6) C10H C9H C14H C13H 27.5(6)  
C4E N1E C8E C9E 178.9(5) C10H C11H C12H C7H 41.8(6)  
C4E C5E C6E C1E 0.7(8) C10H C11H C12H C15H 163.2(4)  
C4E C5E C7E C8E -0.1(6) C10H C11H C12H C16H -77.6(5)  
C4E C5E C7E C12E -176.8(5) C10H C11H C13H C14H -26.2(6)

C5E C7E C8E N1E 0.7(6) C11HC13HC14HC9H -0.8(6)  
 C5E C7E C8E C9E -179.2(5) C12HC7H C8H N1H 179.2(4)  
 C5E C7E C12E C11E 176.3(5) C12HC7H C8H C9H -0.3(8)  
 C5E C7E C12E C15E 56.6(8) C12HC11HC13HC14H90.7(6)  
 C5E C7E C12E C16E -63.6(7) C13HC11HC12HC7H -68.6(6)  
 C6E C1E C2E C3E 0.5(10) C13HC11HC12HC15H52.8(6)  
 C6E C5E C7E C8E 179.5(6) C13HC11HC12HC16H172.1(5)  
 C6E C5E C7E C12E 2.9(10) C14HC9H C10HC11H-41.3(5)

Table 7 Hydrogen Atom Coordinates ( $\text{\AA}\times 10^4$ ) and Isotropic Displacement Parameters ( $\text{\AA}^2\times 10^3$ ) for JW315a.

| Atom | x     | y    | z    | U(eq) |
|------|-------|------|------|-------|
| H1A  | -1894 | 5487 | 1554 | 44    |
| H2A  | 910   | 7253 | 1614 | 44    |
| H3A  | -830  | 6746 | 1442 | 43    |
| H6A  | 2250  | 5416 | 2288 | 39    |
| H9A  | -2414 | 4122 | 1701 | 56    |
| H10A | -1417 | 2976 | 1780 | 75    |
| H10B | -626  | 3479 | 1463 | 75    |
| H11A | 200   | 2946 | 2469 | 56    |
| H13A | -679  | 3474 | 3255 | 80    |
| H14A | -2250 | 4093 | 2816 | 81    |
| H15A | 1926  | 4505 | 2970 | 102   |
| H15B | 1670  | 3726 | 3176 | 102   |
| H15C | 835   | 4353 | 3240 | 102   |
| H16A | 1176  | 3615 | 1588 | 92    |
| H16B | 1933  | 3322 | 2171 | 92    |
| H16C | 2093  | 4109 | 1951 | 92    |
| H1B  | 6797  | 4133 | -21  | 45    |
| H2B  | 7611  | 6606 | 252  | 46    |
| H3B  | 7642  | 5465 | -134 | 45    |
| H6B  | 5761  | 5952 | 1467 | 39    |
| H9B  | 5886  | 2963 | 381  | 51    |
| H10C | 6067  | 3217 | 1504 | 52    |
| H10D | 5227  | 2587 | 1277 | 52    |
| H11B | 4078  | 3380 | 1685 | 48    |
| H13B | 2900  | 3512 | 703  | 56    |
| H14B | 3934  | 3213 | -73  | 57    |
| H15D | 4055  | 5330 | 1432 | 73    |
| H15E | 3271  | 4709 | 1582 | 73    |
| H15F | 3483  | 4824 | 914  | 73    |
| H16D | 5886  | 4050 | 2196 | 81    |

|      |       |      |      |    |
|------|-------|------|------|----|
| H16E | 4804  | 4406 | 2361 | 81 |
| H16F | 5728  | 4885 | 2145 | 81 |
| H1C  | 9210  | 4385 | 9180 | 51 |
| H2C  | 5830  | 3046 | 8917 | 58 |
| H3C  | 7687  | 3285 | 9187 | 57 |
| H6C  | 5279  | 5005 | 8230 | 39 |
| H9C  | 10248 | 5574 | 8903 | 59 |
| H10E | 9904  | 6505 | 8167 | 61 |
| H10F | 9117  | 5876 | 7877 | 61 |
| H11C | 8188  | 7045 | 8054 | 49 |
| H13C | 8365  | 7245 | 9137 | 57 |
| H14C | 9613  | 6394 | 9650 | 62 |
| H15G | 5662  | 6225 | 8428 | 62 |
| H15H | 6203  | 6976 | 8344 | 62 |
| H15I | 6564  | 6537 | 8942 | 62 |
| H16G | 7417  | 5843 | 7381 | 70 |
| H16H | 6608  | 6498 | 7391 | 70 |
| H16I | 6206  | 5720 | 7520 | 70 |
| H1D  | 6599  | 3565 | 5041 | 49 |
| H2D  | 7753  | 1148 | 5302 | 58 |
| H3D  | 7576  | 2285 | 4903 | 53 |
| H6D  | 5675  | 1615 | 6460 | 47 |
| H9D  | 5240  | 4597 | 5301 | 57 |
| H10G | 3570  | 4683 | 5737 | 64 |
| H10H | 3559  | 3877 | 5505 | 64 |
| H11D | 3540  | 4055 | 6627 | 55 |
| H13D | 5320  | 4554 | 7083 | 58 |
| H14D | 6297  | 4934 | 6308 | 58 |
| H15J | 5154  | 2461 | 7110 | 71 |
| H15K | 4469  | 3075 | 7360 | 71 |
| H15L | 5669  | 3232 | 7219 | 71 |
| H16J | 3228  | 2809 | 5830 | 70 |
| H16K | 2925  | 2841 | 6487 | 70 |
| H16L | 3686  | 2222 | 6309 | 70 |
| H1E  | 9292  | 6728 | 4239 | 44 |
| H2E  | 10274 | 9180 | 4501 | 55 |
| H3E  | 10191 | 8034 | 4109 | 49 |
| H6E  | 8223  | 8636 | 5654 | 40 |
| H9E  | 8292  | 5596 | 4636 | 56 |
| H10I | 8419  | 5883 | 5754 | 59 |
| H10J | 7559  | 5266 | 5524 | 59 |
| H11E | 6430  | 6098 | 5900 | 54 |

|      |       |      |      |     |
|------|-------|------|------|-----|
| H13E | 5287  | 6203 | 4909 | 61  |
| H14E | 6363  | 5891 | 4155 | 61  |
| H15M | 6452  | 8029 | 5602 | 73  |
| H15N | 5654  | 7416 | 5754 | 73  |
| H15O | 5900  | 7507 | 5090 | 73  |
| H16M | 8253  | 6767 | 6421 | 81  |
| H16N | 7164  | 7140 | 6559 | 81  |
| H16O | 8107  | 7601 | 6342 | 81  |
| H1F  | 473   | 7789 | 5691 | 48  |
| H2F  | 3112  | 9690 | 5757 | 59  |
| H3F  | 1417  | 9101 | 5555 | 53  |
| H6F  | 4504  | 7980 | 6645 | 40  |
| H9F  | 154   | 6417 | 5849 | 45  |
| H10K | 1270  | 5358 | 6072 | 58  |
| H10L | 2073  | 5892 | 5795 | 58  |
| H11F | 2758  | 5449 | 6855 | 55  |
| H13F | 1516  | 5887 | 7509 | 55  |
| H14F | -33   | 6460 | 6942 | 50  |
| H15P | 4178  | 7055 | 7439 | 101 |
| H15Q | 3795  | 6301 | 7643 | 101 |
| H15R | 2971  | 6955 | 7591 | 101 |
| H16P | 3855  | 6180 | 6040 | 83  |
| H16Q | 4542  | 5959 | 6667 | 83  |
| H16R | 4593  | 6751 | 6434 | 83  |
| H1Z  | 840   | 8098 | 5720 | 43  |
| H2Z  | 4048  | 9578 | 5990 | 57  |
| H3Z  | 2215  | 9255 | 5707 | 51  |
| H6Z  | 4790  | 7669 | 6760 | 49  |
| H9Z  | 45    | 6779 | 5845 | 60  |
| H10M | 789   | 5598 | 5981 | 62  |
| H10N | 1735  | 6027 | 5721 | 62  |
| H11Z | 2296  | 5433 | 6739 | 68  |
| H13Z | 1305  | 6022 | 7463 | 75  |
| H14Z | -65   | 6771 | 6942 | 64  |
| H15S | 4170  | 6911 | 7351 | 78  |
| H15T | 3798  | 6148 | 7540 | 78  |
| H15U | 3001  | 6808 | 7552 | 78  |
| H16S | 3627  | 6044 | 5946 | 80  |
| H16T | 4216  | 5697 | 6553 | 80  |
| H16U | 4533  | 6478 | 6378 | 80  |
| H1G  | -1941 | 2108 | 6547 | 41  |
| H2G  | 1037  | 453  | 6656 | 54  |

|      |       |      |       |    |
|------|-------|------|-------|----|
| H3G  | -753  | 901  | 6448  | 49 |
| H6G  | 2151  | 2319 | 7391  | 43 |
| H9G  | -2674 | 3354 | 6875  | 44 |
| H10O | -2050 | 4264 | 7604  | 50 |
| H10P | -1388 | 3572 | 7870  | 50 |
| H11G | -227  | 4639 | 7660  | 44 |
| H13G | -497  | 4843 | 6567  | 46 |
| H14G | -1971 | 4099 | 6097  | 44 |
| H15V | 2029  | 3601 | 7214  | 57 |
| H15W | 1649  | 4396 | 7289  | 57 |
| H15X | 1166  | 3960 | 6706  | 57 |
| H16V | 330   | 3397 | 8317  | 68 |
| H16W | 1245  | 3983 | 8285  | 68 |
| H16X | 1486  | 3177 | 8147  | 68 |
| H1H  | 795   | 5930 | 10783 | 41 |
| H2H  | -405  | 3545 | 10377 | 47 |
| H3H  | -303  | 4680 | 10800 | 46 |
| H6H  | 1912  | 4045 | 9367  | 36 |
| H9H  | 2291  | 6931 | 10672 | 44 |
| H10Q | 3936  | 6183 | 10467 | 52 |
| H10R | 4034  | 7012 | 10320 | 52 |
| H11H | 4121  | 6501 | 9382  | 44 |
| H13H | 2440  | 7125 | 8932  | 52 |
| H14H | 1385  | 7424 | 9686  | 54 |
| H15Y | 2356  | 5038 | 8704  | 56 |
| H    | 3111  | 5665 | 8533  | 56 |
| HA   | 1916  | 5831 | 8677  | 56 |
| H16Y | 4336  | 5200 | 10018 | 56 |
| HB   | 4576  | 5243 | 9349  | 56 |
| HC   | 3786  | 4644 | 9533  | 56 |

Table 8 Atomic Occupancy for JW315a.

| <i>Atom Occupancy</i> | <i>Atom Occupancy</i> | <i>Atom Occupancy</i> |
|-----------------------|-----------------------|-----------------------|
| C11F 0.6              | N1F 0.6               | H1F 0.6               |
| C1F 0.6               | C2F 0.6               | H2F 0.6               |
| C3F 0.6               | H3F 0.6               | C4F 0.6               |
| C5F 0.6               | C6F 0.6               | H6F 0.6               |
| C7F 0.6               | C8F 0.6               | C9F 0.6               |
| H9F 0.6               | C10F 0.6              | H10K 0.6              |
| H10L 0.6              | C11F 0.6              | H11F 0.6              |
| C12F 0.6              | C13F 0.6              | H13F 0.6              |
| C14F 0.6              | H14F 0.6              | C15F 0.6              |

|          |          |          |
|----------|----------|----------|
| H15P 0.6 | H15Q 0.6 | H15R 0.6 |
| C16F 0.6 | H16P 0.6 | H16Q 0.6 |
| H16R 0.6 | C11Z 0.4 | N1Z 0.4  |
| H1Z 0.4  | C1Z 0.4  | C2Z 0.4  |
| H2Z 0.4  | C3Z 0.4  | H3Z 0.4  |
| C4Z 0.4  | C5Z 0.4  | C6Z 0.4  |
| H6Z 0.4  | C7Z 0.4  | C8Z 0.4  |
| C9Z 0.4  | H9Z 0.4  | C10Z 0.4 |
| H10M 0.4 | H10N 0.4 | C11Z 0.4 |
| H11Z 0.4 | C12Z 0.4 | C13Z 0.4 |
| H13Z 0.4 | C14Z 0.4 | H14Z 0.4 |
| C15Z 0.4 | H15S 0.4 | H15T 0.4 |
| H15U 0.4 | C16Z 0.4 | H16S 0.4 |
| H16T 0.4 | H16U 0.4 |          |

## Experimental

Single crystals of C<sub>16</sub>H<sub>16</sub>CIN [JW315a] were used as received. A suitable crystal was selected and mounted on a nylon loop using a small amount of paratone oil on a 'Bruker APEX-II CCD' diffractometer. The crystal was kept at 173.0 K during data collection. Using Olex2 [1], the structure was solved with the ShelXS [2] structure solution program using Direct Methods and refined with the ShelXL [3] refinement package using Least Squares minimization.

1. Dolomanov, O.V., Bourhis, L.J., Gildea, R.J., Howard, J.A.K. & Puschmann, H. (2009), *J. Appl. Cryst.* 42, 339-341.
2. Sheldrick, G.M. (2008). *Acta Cryst.* A64, 112-122.
3. Sheldrick, G.M. (2008). *Acta Cryst.* A64, 112-122.

## Crystal structure determination of [JW315a]

**Crystal Data** for C<sub>16</sub>H<sub>16</sub>CIN (*M* = 257.75 g/mol): monoclinic, space group P2<sub>1</sub> (no. 4), *a* = 12.4101(3) Å, *b* = 18.9939(3) Å, *c* = 22.7815(4) Å,  $\beta$  = 99.0520(10)°, *V* = 5303.09(18) Å<sup>3</sup>, *Z* = 16, *T* = 173.0 K,  $\mu$ (CuK $\alpha$ ) = 2.372 mm<sup>-1</sup>, *D*<sub>calc</sub> = 1.291 g/cm<sup>3</sup>, 66305 reflections measured (3.928° ≤ 2 $\theta$  ≤ 144.904°), 20467 unique (*R*<sub>int</sub> = 0.0891, *R*<sub>sigma</sub> = 0.0731) which were used in all calculations. The final *R*<sub>1</sub> was 0.0522 (*I* > 2 $\sigma$ (*I*)) and *wR*<sub>2</sub> was 0.1280 (all data).

## Refinement model description

Number of restraints - 522, number of constraints - unknown.

Details:

1. Fixed Uiso

At 1.2 times of:

All C(H) groups, All C(H,H) groups, All N(H) groups

At 1.5 times of:

All C(H,H,H) groups

2. Rigid bond restraints

C11F, N1F, C1F, C2F, C3F, C4F, C5F, C6F, C7F, C8F, C9F, C10F, C11F, C12F, C13F, C14F, C15F, C16F

with sigma for 1-2 distances of 0.01 and sigma for 1-3 distances of 0.01

C11Z, N1Z, C1Z, C2Z, C3Z, C4Z, C5Z, C6Z, C7Z, C8Z, C9Z, C10Z, C11Z, C12Z, C13Z, C14Z, C15Z, C16Z

with sigma for 1-2 distances of 0.01 and sigma for 1-3 distances of 0.01

### 3. Uiso/Uanis restraints and constraints

C11F  $\approx$  N1F  $\approx$  C1F  $\approx$  C2F  $\approx$  C3F  $\approx$  C4F  $\approx$  C5F  $\approx$  C6F

$\approx$  C7F  $\approx$  C8F  $\approx$  C9F  $\approx$  C10F  $\approx$  C11F  $\approx$  C12F  $\approx$  C13F  $\approx$

C14F  $\approx$  C15F  $\approx$  C16F: within 1.7Å with sigma of 0.04 and sigma for terminal atoms of 0.08

C11Z  $\approx$  N1Z  $\approx$  C1Z  $\approx$  C2Z  $\approx$  C3Z  $\approx$  C4Z  $\approx$  C5Z  $\approx$  C6Z

$\approx$  C7Z  $\approx$  C8Z  $\approx$  C9Z  $\approx$  C10Z  $\approx$  C11Z  $\approx$  C12Z  $\approx$  C13Z  $\approx$

C14Z  $\approx$  C15Z  $\approx$  C16Z: within 1.7Å with sigma of 0.04 and sigma for terminal atoms of 0.08

Uanis(C2Z)  $\approx$  Ueq: with sigma of 0.01 and sigma for terminal atoms of 0.02

### 4. Same fragment restrains

{C11A, N1A, C1A, C2A, C3A, C4A, C5A, C6A, C7A, C8A, C9A, C10A, C11A, C12A, C13A, C14A, C15A, C16A} sigma for 1-2: 0.02, 1-3: 0.04

as

{C11F, N1F, C1F, C2F, C3F, C4F, C5F, C6F, C7F, C8F, C9F, C10F, C11F, C12F, C13F, C14F, C15F, C16F}

{C11A, N1A, C1A, C2A, C3A, C4A, C5A, C6A, C7A, C8A, C9A, C10A, C11A, C12A, C13A, C14A, C15A, C16A} sigma for 1-2: 0.02, 1-3: 0.04

as

{C11Z, N1Z, C1Z, C2Z, C3Z, C4Z, C5Z, C6Z, C7Z, C8Z, C9Z, C10Z, C11Z, C12Z, C13Z, C14Z, C15Z, C16Z}

### 5. Others

Fixed Sof: C11F(0.6) N1F(0.6) H1F(0.6) C1F(0.6) C2F(0.6) H2F(0.6) C3F(0.6) H3F(0.6) C4F(0.6) C5F(0.6) C6F(0.6) H6F(0.6) C7F(0.6) C8F(0.6) C9F(0.6) H9F(0.6) C10F(0.6) H10K(0.6) H10L(0.6) C11F(0.6) H11F(0.6) C12F(0.6) C13F(0.6) H13F(0.6) C14F(0.6) H14F(0.6) C15F(0.6) H15P(0.6) H15Q(0.6) H15R(0.6) C16F(0.6) H16P(0.6) H16Q(0.6) H16R(0.6) C11Z(0.4) N1Z(0.4) H1Z(0.4) C1Z(0.4) C2Z(0.4) H2Z(0.4) C3Z(0.4) H3Z(0.4) C4Z(0.4) C5Z(0.4) C6Z(0.4) H6Z(0.4) C7Z(0.4) C8Z(0.4) C9Z(0.4) H9Z(0.4) C10Z(0.4) H10M(0.4) H10N(0.4) C11Z(0.4) H11Z(0.4) C12Z(0.4) C13Z(0.4) H13Z(0.4) C14Z(0.4) H14Z(0.4) C15Z(0.4) H15S(0.4) H15T(0.4) H15U(0.4) C16Z(0.4) H16S(0.4) H16T(0.4) H16U(0.4)

### 6.a Ternary CH refined with riding coordinates:

C9A(H9A), C11A(H11A), C9B(H9B), C11B(H11B), C9C(H9C), C11C(H11C), C9D(H9D),

C11D(H11D), C9E(H9E), C11E(H11E), C9F(H9F), C11F(H11F), C9Z(H9Z), C11Z(H11Z),

C9G(H9G), C11G(H11G), C9H(H9H), C11H(H11H)

### 6.b Secondary CH2 refined with riding coordinates:

C10A(H10A,H10B), C10B(H10C,H10D), C10C(H10E,H10F), C10D(H10G,H10H), C10E(H10I),

H10J), C10F(H10K,H10L), C10Z(H10M,H10N), C10G(H10O,H10P),

C10H(H10Q,H10R)

6.c Aromatic/amide H refined with riding coordinates:

N1A(H1A), C2A(H2A), C3A(H3A), C6A(H6A), C13A(H13A), C14A(H14A),  
N1B(H1B),  
C2B(H2B), C3B(H3B), C6B(H6B), C13B(H13B), C14B(H14B), N1C(H1C),  
C2C(H2C),  
C3C(H3C), C6C(H6C), C13C(H13C), C14C(H14C), N1D(H1D), C2D(H2D),  
C3D(H3D),  
C6D(H6D), C13D(H13D), C14D(H14D), N1E(H1E), C2E(H2E), C3E(H3E),  
C6E(H6E),  
C13E(H13E), C14E(H14E), N1F(H1F), C2F(H2F), C3F(H3F), C6F(H6F), C13F(H13F),  
C14F(H14F), N1Z(H1Z), C2Z(H2Z), C3Z(H3Z), C6Z(H6Z), C13Z(H13Z),  
C14Z(H14Z),  
N1G(H1G), C2G(H2G), C3G(H3G), C6G(H6G), C13G(H13G), C14G(H14G),  
N1H(H1H),  
C2H(H2H), C3H(H3H), C6H(H6H), C13H(H13H), C14H(H14H)

6.d Idealised Me refined as rotating group:

C15A(H15A,H15B,H15C), C16A(H16A,H16B,H16C), C15B(H15D,H15E,H15F),  
C16B(H16D,  
H16E,H16F), C15C(H15G,H15H,H15I), C16C(H16G,H16H,H16I),  
C15D(H15J,H15K,H15L),  
C16D(H16J,H16K,H16L), C15E(H15M,H15N,H15O), C16E(H16M,H16N,H16O),  
C15F(H15P,  
H15Q,H15R), C16F(H16P,H16Q,H16R), C15Z(H15S,H15T,H15U),  
C16Z(H16S,H16T,H16U),  
C15G(H15V,H15W,H15X), C16G(H16V,H16W,H16X), C15H(H15Y,H,HA),  
C16H(H16Y,HB,HC)

This report has been created with Olex2, compiled on 2015.01.26 svn.r3151 for OlexSys.  
Please [let us know](#) if there are any errors or if you would like to have additional features.
